# Supplementary material for: Resolving the full spectrum of human genome variation using Linked-Reads
Source: HighWire-hosted journal article supplement (doi:10.1101/gr.234443.118), 2019-03-20

# Vitess

## The Complete Story

Percona Live Data Performance Conference

April 20, 2016

Sugu Sougoumarane, Anthony Yeh

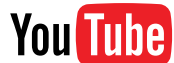

<http://vitess.io>

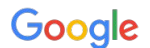

# What is Vitess?

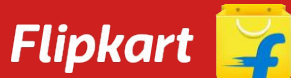

*"Flipkart's developers might soon forget what MySQL sharding is, thanks to Vitess."*

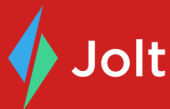

*"After researching many different sharding strategies and tools used by the biggest companies we could find, Vitess was the obvious choice."*

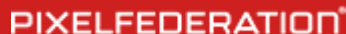

*"With Vitess, it is possible to shard your application data out of the box, with not more than 10 changed lines of code!"*

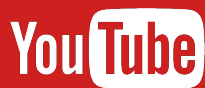

*"We had to come up with something that would leap ahead of the curve instead of just fighting fires. When we finally built the initial feature list, it was obvious that we were addressing problems that are common to all growing organizations."*

# Outline

- Vitess Overview
  - Cluster Architecture
  - Client Libraries
  - Sharding Demo
- V3 API Deep Dive
  - Evolution
  - Concepts
  - Example

# Vitess Overview

# Encapsulated MySQL Scalability

## Built on proven technologies:

- MySQL Replication
- InnoDB

## Using proven techniques:

- Shared-nothing shards
- Consistent hashing

## And proven at scale:

- Continuously deployed at YouTube (1B+ users)
- Thousands of DB servers, one oncall

## Encapsulation means:

- The app is hidden from Vitess
  - Nothing YouTube-specific
- Sharding is hidden from the app
  - Looks like one logical DB
- Complexity is hidden from the operator
  - Operator overhead is  $O(1)$  as number of servers grows
- Maintenance is hidden from end users
  - No user-visible downtime

# The Secret Vitess Master Plan

## ✓ Phase 1

*YouTube never has to worry about DB scalability again.*

## ➡ Phase 2

*Anyone can run MySQL at YouTube scale in the cloud.*

## Phase 3

*More workloads move into the cloud. (\$\$\$)*

# What's New

# Client Libraries

- Java (JDBC)
- PHP (PDO)
- Python (PEP 0249)
- Go (database/sql)

# Query Support

- Cross-shard auto-increment
- Cross-shard joins
- Automatic shard lookup tables (secondary vindexes)

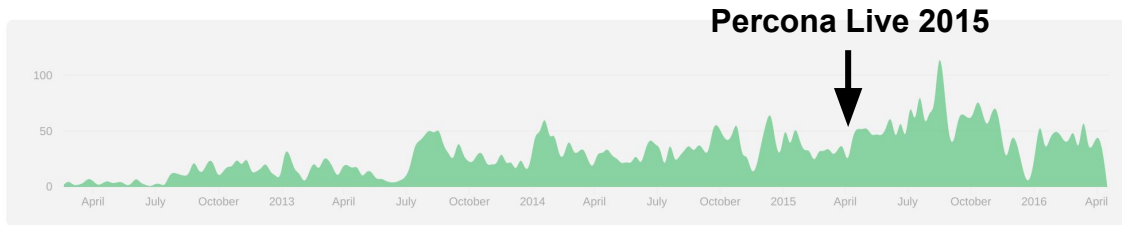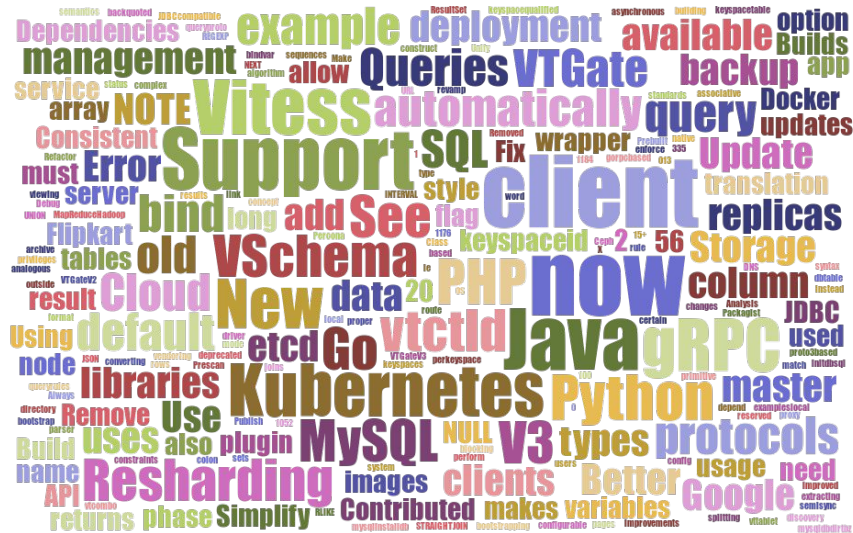

# Scorecard: Last year's Roadmap slide

- MySQL 5.6 ✓
- Benchmarks (YCSB) ✓
- VTGate V3 ✓
  - Automatic lookup tables ✓
  - Cross-shard auto\_increment ✓
  - MySQL binary protocol
- High-level automation
  - One-click resharding ✓
  - Rolling (OOB) schema changes
- More documentation
  - Architecture / design ✓
  - How-to guides ✓
- Kubernetes
  - API server proxy for debug access ✓
  - Replication controllers for tablets
  - Cloud plugins for backup/restore (Google Cloud Storage) ✓
- More client support
  - gRPC ✓
  - PHP ✓
- Long-term
  - Cross-shard transactions (2PC)
  - Cross-shard joins/aggregation ✓



# Cluster Architecture

# Components

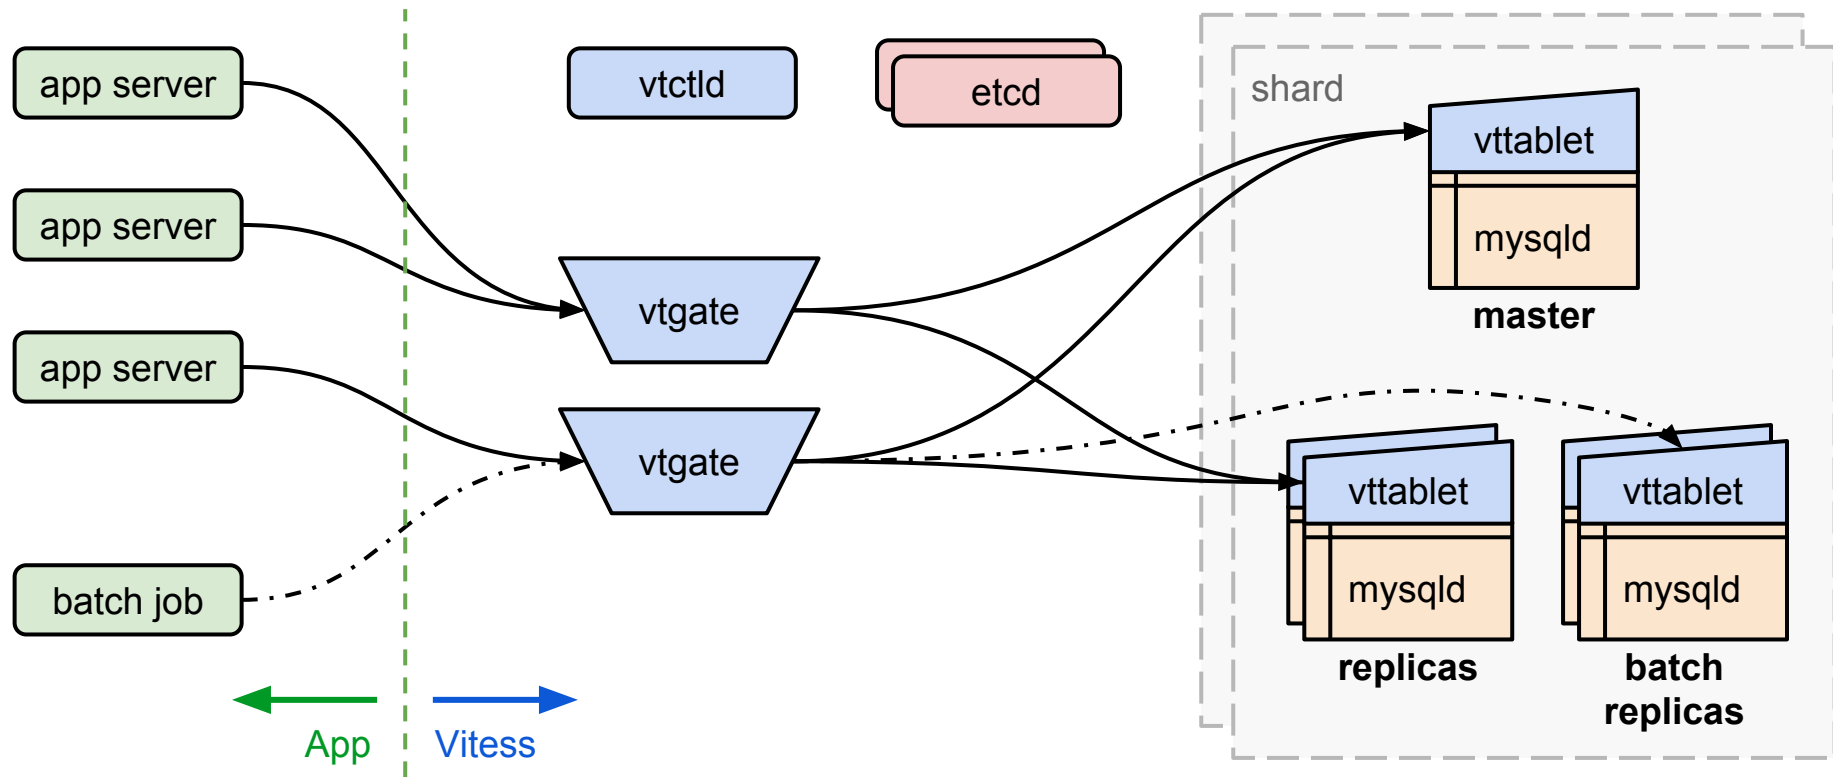

# Topology

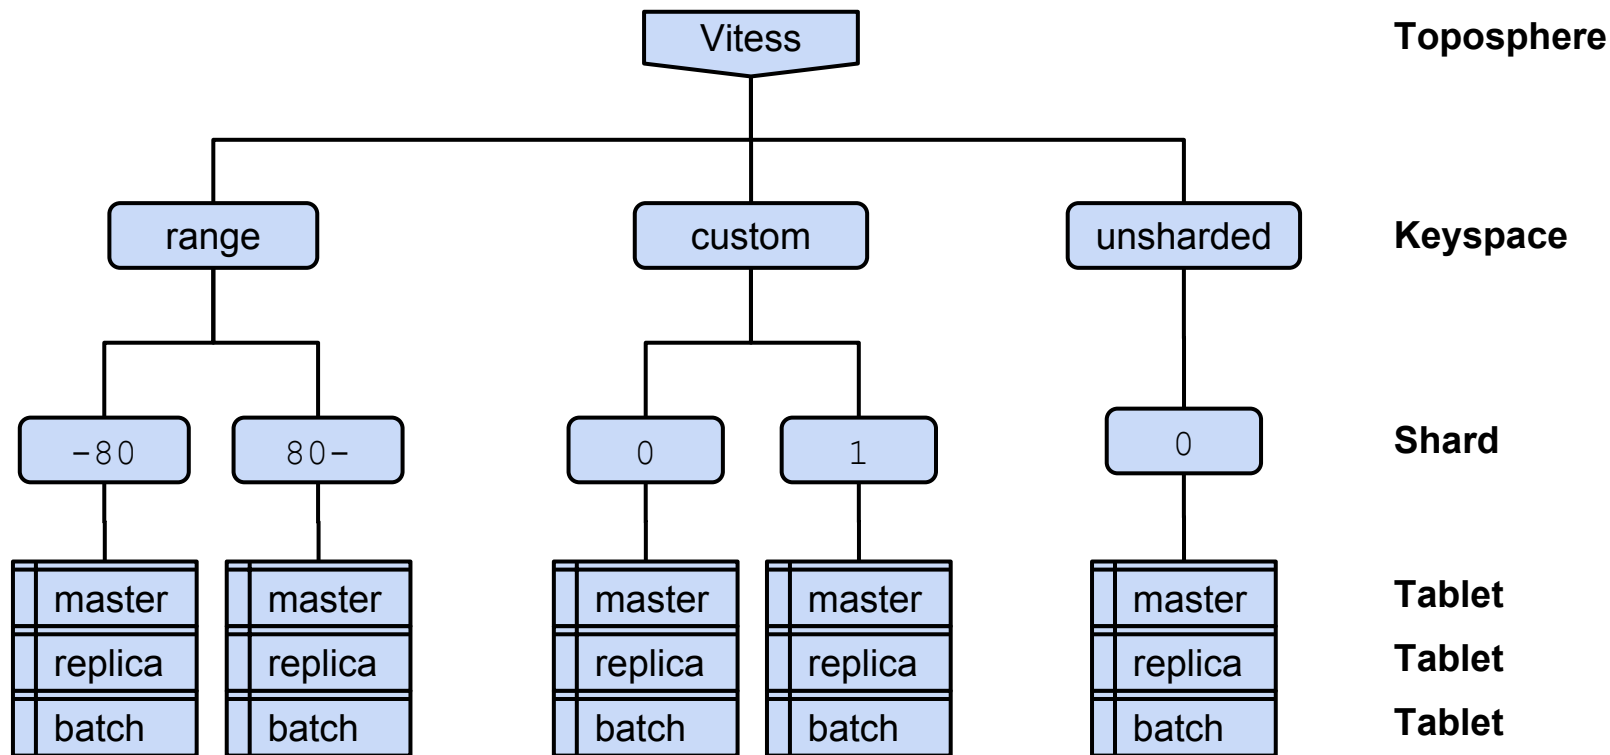

# Consistent Hashing

- Keyspace ID: hash of sharding key (e.g. user ID)
- Shard Name: [start]-[end]
  - `keyspace_id`, [start] and [end] are all byte arrays
  - Compare byte arrays lexicographically (string compare):
    - `[start] <= keyspace_id < [end]`
  - Leave out [start] or [end] to make that side unbounded

| Shard Name | Key Range (assuming 64-bit keyspace IDs)          |
|------------|---------------------------------------------------|
| -80        | 00 00 00 00 00 00 00 00 - 7F FF FF FF FF FF FF FF |
| 80-        | 80 00 00 00 00 00 00 00 - FF FF FF FF FF FF FF FF |

**Bonus Question:** What's the first shard name if you want 512 equal shards?

*Hint: What's the first key range for 256 shards? What's the midpoint of that range?*

# Client Libraries

# Java

- JDBC-compatible interface
  - Contributed by Flipkart
  - <https://github.com/youtube/vitess>

```
Connection conn =  
    DriverManager.getConnection("jdbc:vitess://vtgate:15991/keyspace", null);  
String sql = "select * from test_table where id = ?";  
PreparedStatement preparedStatement = conn.prepareStatement(sql);  
preparedStatement.setInt(1, 10);  
rs = preparedStatement.executeQuery();
```

# PHP

- PDO-compatible interface
  - Open-sourced by Pixel Federation
  - <https://github.com/pixelfederation/vitess-php-pdo>

```
$pdo = new PDO("vitess:dbname=keyspace;host=vtgate;port=15991");  
$stmt = $pdo->prepare("SELECT * FROM user WHERE user_id IN (?, ?)");  
$result = $stmt->execute([151, 152]);
```

# Python

- PEP 249-compatible interface
  - <https://github.com/youtube/vitess/blob/master/examples/kubernetes/guestbook>

```
conn = vtgate_client.connect('grpc', 'vtgate:15991', timeout)
cursor = conn.cursor(tablet_type='replica', keyspace='keyspace')
cursor.execute('SELECT message, time_created_ns FROM messages WHERE page=:page
ORDER BY time_created_ns', {'page': page})
entries = [row[0] for row in cursor.fetchall()]
```



# Go

- database/sql driver
  - <https://godoc.org/github.com/youtube/vitess/go/vt/vitessdriver>

```
db, err := vitessdriver.Open("vtgate:15991", "master", timeout)
tx, err := db.Begin()
_, err := tx.Exec("INSERT INTO test_table (msg) VALUES (?)", "V is for speed")
err := tx.Commit()
```

# Sharding Demo

[vitess.io/getting-started](https://vitess.io/getting-started)

[vitess.io/user-guide/sharding-kubernetes.html](https://vitess.io/user-guide/sharding-kubernetes.html)

# Guestbook

<http://viteess.ddns.net>

## Guestbook Page 62

<http://viteess.ddns.net/page/62>  
[/env](#)

# Kubernetes

 **kubernetes**

← guestbook

**Replication controller**

Name  
guestbook

Namespace  
default

Pods  
10 running

Label selector  
app: guestbook

Labels  
app: guestbook

Images  
viteess/guestbook

**Services**

Name  
guestbook

Label selector  
app: guestbook

Internal endpoint  
guestbook:80 TCP

External endpoint  
104.197.29.52:80

PODS

EVENTS

| ↑ Pod           | Status  | Restarts | Age        | CPU (cores) | Memory (B) | Cluster IP | Node                                   | Logs |
|-----------------|---------|----------|------------|-------------|------------|------------|----------------------------------------|------|
| guestbook-001ny | Running | 1        | 20 minutes | 0.004       | 60.883 Mi  | 10.64.2.5  | gke-example-default-pool-013ab373-f4it | Logs |
| guestbook-88bfy | Running | 1        | 20 minutes | 0.004       | 69.289 Mi  | 10.64.2.4  | gke-example-default-pool-013ab373-f4it | Logs |
| guestbook-8hn3p | Running | 1        | 20 minutes | 0.005       | 79.031 Mi  | 10.64.4.8  | gke-example-default-pool-013ab373-79tg | Logs |
| guestbook-kgeby | Running | 8        | 3 days     | 0.005       | 85.828 Mi  | 10.64.3.3  | gke-example-default-pool-013ab373-k3v6 | Logs |
| guestbook-pw0mx | Running | 1        | 20 minutes | 0.004       | 58.531 Mi  | 10.64.0.8  | gke-example-default-pool-013ab373-fpvz | Logs |
| guestbook-py4s8 | Running | 7        | 4 days     | 0.005       | 116.414 Mi | 10.64.1.8  | gke-example-default-pool-013ab373-h3k2 | Logs |
| guestbook-sb8j3 | Running | 8        | 4 days     | 0.004       | 65.477 Mi  | 10.64.0.6  | gke-example-default-pool-013ab373-fpvz | Logs |
| guestbook-sggnh | Running | 1        | 20 minutes | 0.005       | 68.773 Mi  | 10.64.3.7  | gke-example-default-pool-013ab373-k3v6 | Logs |
| guestbook-sw5z2 | Running | 1        | 20 minutes | 0.004       | 81.398 Mi  | 10.64.2.6  | gke-example-default-pool-013ab373-f4it | Logs |
| guestbook-zbno3 | Running | 1        | 20 minutes | 0.004       | 66.656 Mi  | 10.64.2.7  | gke-example-default-pool-013ab373-f4it | Logs |

# vtctld

Vitess

 DASHBOARD

 TOPOLOGY BROWSER

 SCHEMA MANAGER

 ROUTING INDEXES

Shard Status

Shard Record

Keyspace/Shard

test\_keyspace/0

Master Tablet

None

Tablets (by cell)

TEST

test-100 [master]

Host

[10.64.2.3:15002](#)

IP Address

[10.64.2.3:15002](#)

Seconds Behind Master

0

Health Error

None

STATUS

test-101 [replica]

Host

[10.64.0.7:15002](#)

IP Address

[10.64.0.7:15002](#)

Seconds Behind Master

0

Health Error

None

STATUS

YouTube

Google 21

# vttablet

## Status for vttablet

Started: Wed, 20 Apr 2016 06:20:09 UTC

Running on vttablet-100  
View [variables](#), [debugging profiles](#).

## Tablet

|                                                                                                                                                |                                                                                                                                          |                                                                                                                                               |                                                                                                                                                  |
|------------------------------------------------------------------------------------------------------------------------------------------------|------------------------------------------------------------------------------------------------------------------------------------------|-----------------------------------------------------------------------------------------------------------------------------------------------|--------------------------------------------------------------------------------------------------------------------------------------------------|
| Alias: test-0000000100<br>Keyspace: test_keyspace Shard: 0<br>Serving graph: test_keyspace 0 master<br>Replication graph: test/test_keyspace/0 | <a href="#">Schema</a><br><a href="#">Schema Query Plans</a><br><a href="#">Schema Query Stats</a><br><a href="#">Schema Table Stats</a> | <a href="#">Query Stats</a><br><a href="#">Consolidations</a><br><a href="#">Current Query Log</a><br><a href="#">Current Transaction Log</a> | <a href="#">Health Check</a><br><a href="#">Query Service Health Check</a><br><a href="#">Memcache</a><br><a href="#">Current Stream Queries</a> |
|------------------------------------------------------------------------------------------------------------------------------------------------|------------------------------------------------------------------------------------------------------------------------------------------|-----------------------------------------------------------------------------------------------------------------------------------------------|--------------------------------------------------------------------------------------------------------------------------------------------------|

## Health

Current status: **healthy**

Polling health information from . (healthCheckInterval: 5s; degradedThreshold: 30s; unhealthyThreshold: 2h0m0s)

## Health History

| Time                           | Healthcheck Result                                                                                                       |
|--------------------------------|--------------------------------------------------------------------------------------------------------------------------|
| Apr 20, 2016 at 06:24:07 (UTC) | healthy                                                                                                                  |
| Apr 20, 2016 at 06:21:01 (UTC) | unhealthy: Unknown database 'vt_test_keyspace' (errno 1049)                                                              |
| Apr 20, 2016 at 06:20:16 (UTC) | unhealthy: Can't connect to local MySQL server through socket '/vt/vtdataroot/vt_0000000100/mysql.sock' (2) (errno 2002) |

**healthy**

serving traffic.

**unhappy**

will serve traffic only if there are no fully healthy tablets.

**unhealthy**

will not serve traffic.

## Queryservice

# Sharding Information

## Schema

```
CREATE TABLE messages (  
  page BIGINT(20) UNSIGNED,  
  time_created_ns BIGINT(20) UNSIGNED,  
  message VARCHAR(10000),  
  PRIMARY KEY (page, time_created_ns)  
) ENGINE=InnoDB
```

## VSchema

```
{  
  "Sharded": true,  
  "Vindexes": { "hash": {"Type": "hash"} },  
  "Tables": {  
    "messages": {  
      "ColVindexes": [  
        {"Col": "page", "Name": "hash"}  
      ]  
    }  
  }  
}
```

# Live Migration

Old and new shards overlap during migration.

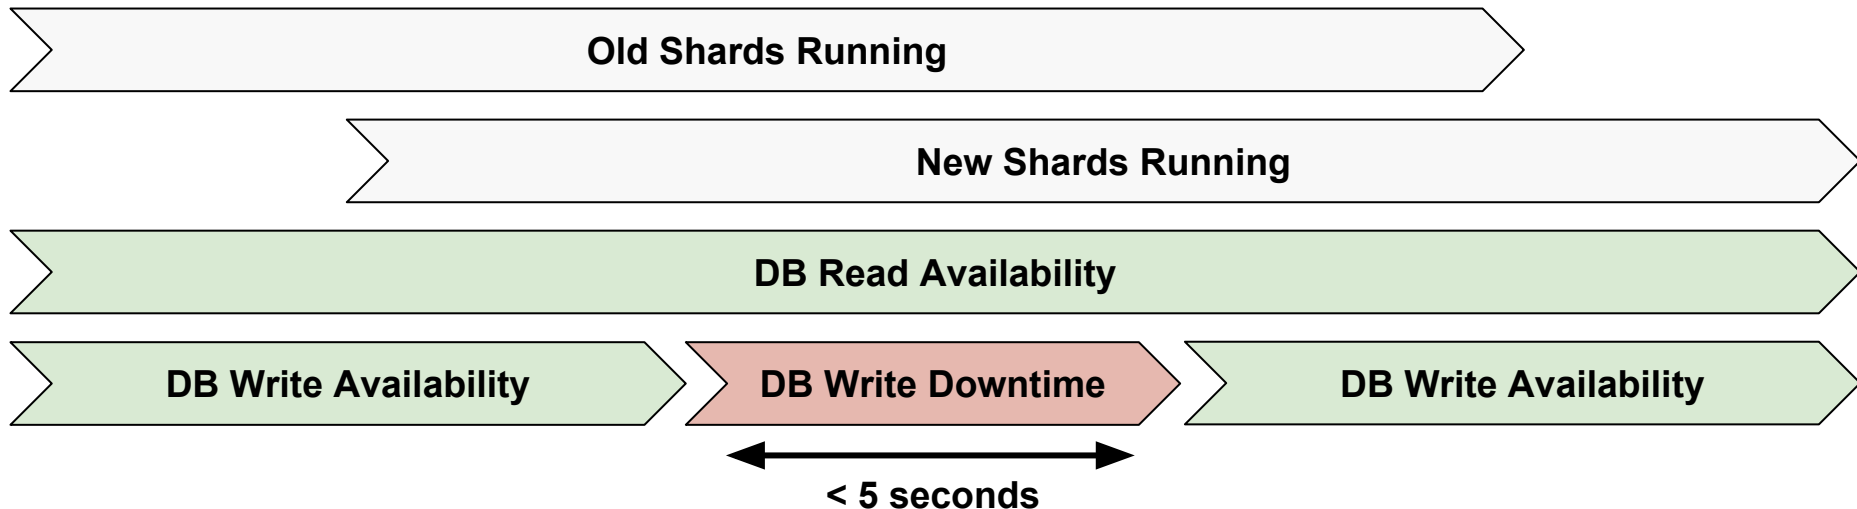



# V3 API ~~Deep Dive~~ Snorkel

# Evolution

# V0

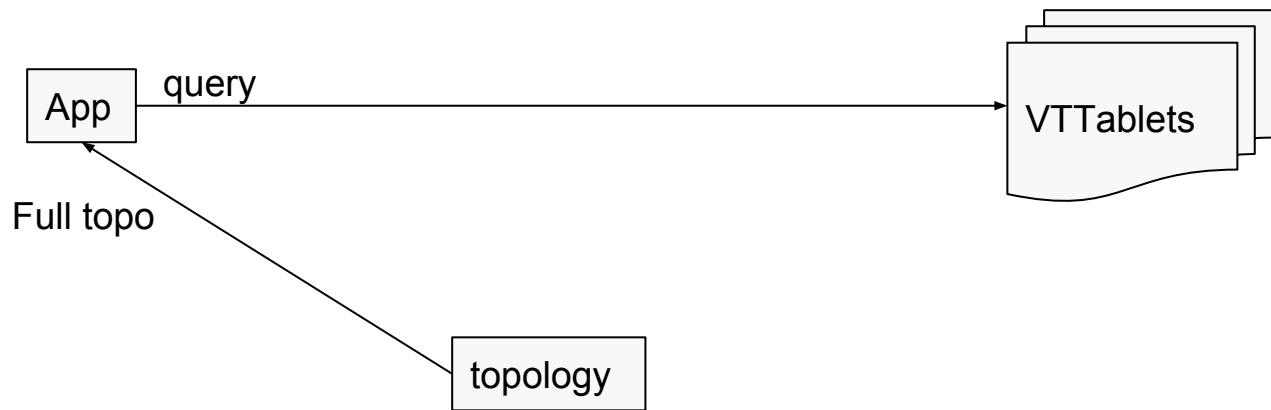

# V1

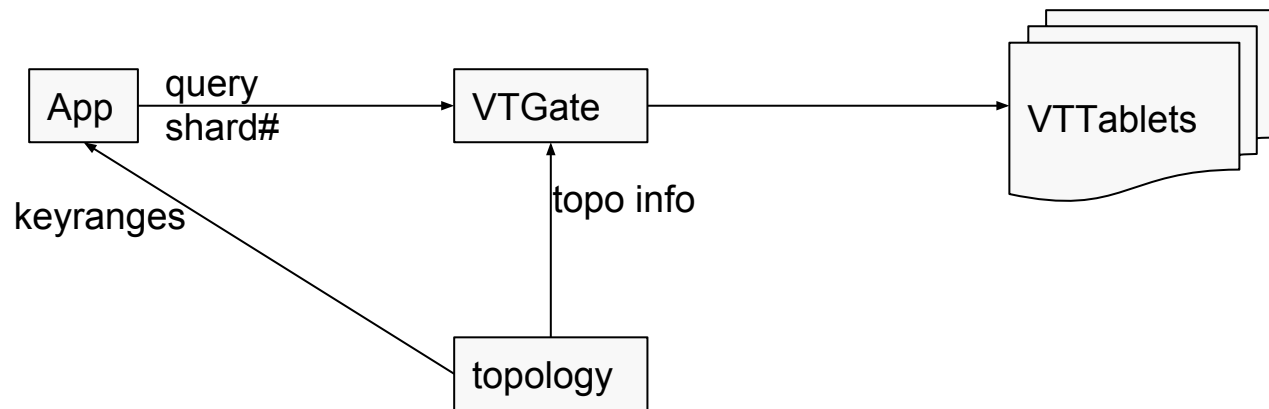

# V2

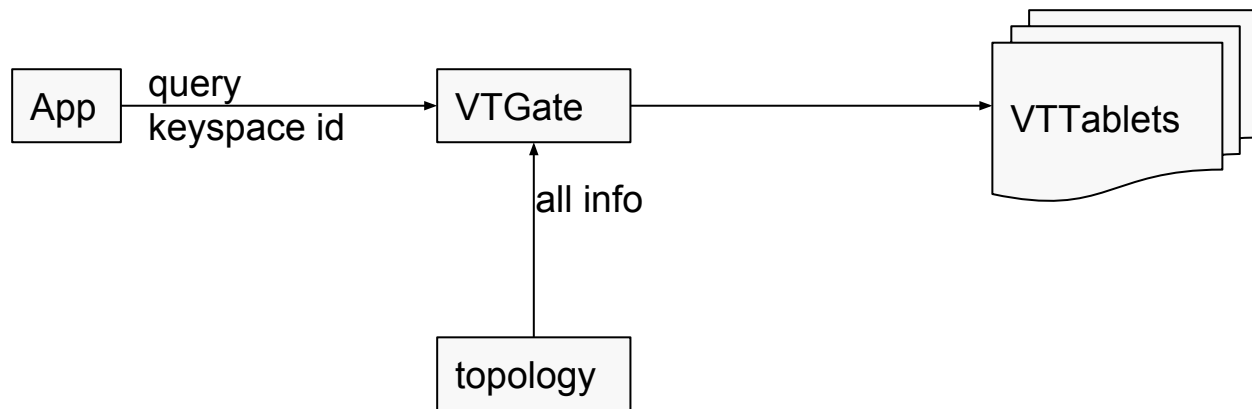

# V3

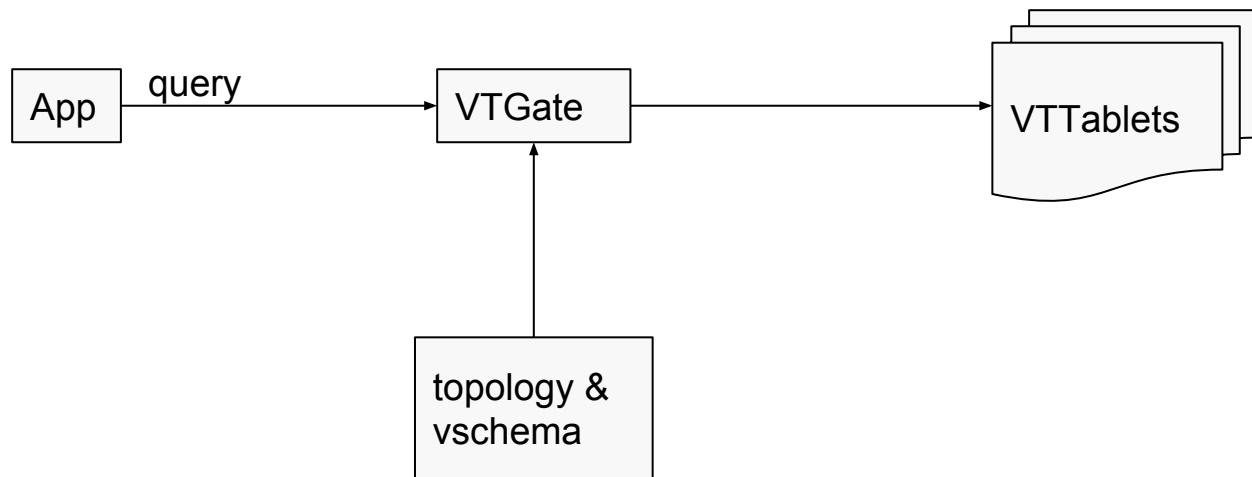

# Game changer

- Drop-in replacement\*
- Feel like a unified database
- DB-compliant APIs
  - Third party tools can integrate
- Sharding key can be an afterthought

\* mostly

# Concepts



# What's an index

---

- Enforces constraints
  - Lets you scan a subset of the rows
- 
- An index is a table
  - A table can act as an index

# Vindexes (Vitess Indexes)

- Analogous to SQL indexes
- Output of a Vindex is one or many keyspace ids
- May be Unique or NonUnique
- A Primary Vindex must be Unique
- A Vindex can be Functional or Lookup
- A Vindex can be user-defined
  - Pluggable sharding scheme

# Index vs Vindex

| SQL                   | Vitess                                    |
|-----------------------|-------------------------------------------|
| Row ID (not in MySQL) | Keyspace ID                               |
| Primary Key           | Primary Vindex (usually the sharding key) |
| Secondary index       | Lookup Table (cross-shard index)          |
| Foreign Key           | Shared Lookup Table                       |
| Auto-inc              | Sequences                                 |
|                       | Custom Index (pluggable sharding)         |

# Vindex usage

- Routing: Where should a query be sent
- Sharding: Where should a row be sent
  - No explicit designation of sharding key
  - Works equally well with user-defined vindexes

# What's a table

---

- A SELECT can stand-in for a table
- A database can serve SELECTs
- A database can be treated like a table

# Parallels

SQL engine

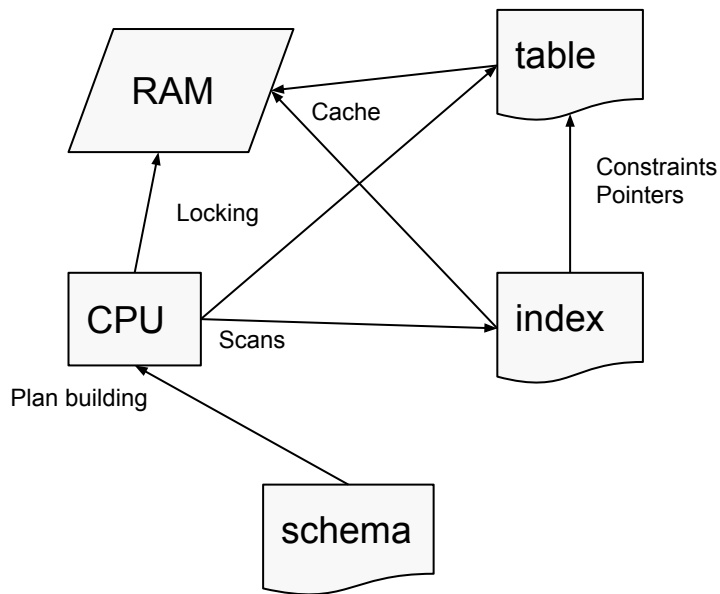

Vitess

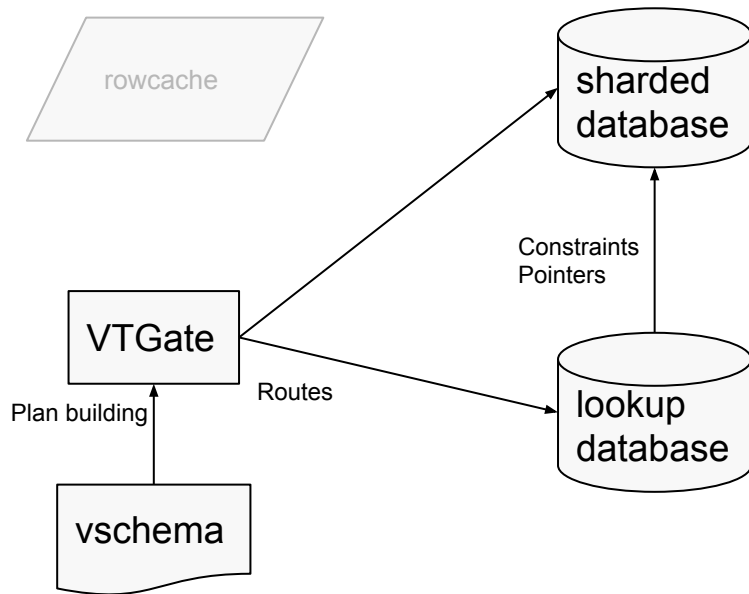

# Some differences

- Network hops are much more expensive
- Each node is versatile
- Full databases underneath, instead of dumb tables
- Entire queries (or chunks) can be outsourced
- Results can still be combined like a traditional engine
- VTGate is both an engine and a router

# Example

<https://github.com/.../examples/demo>



# Schema

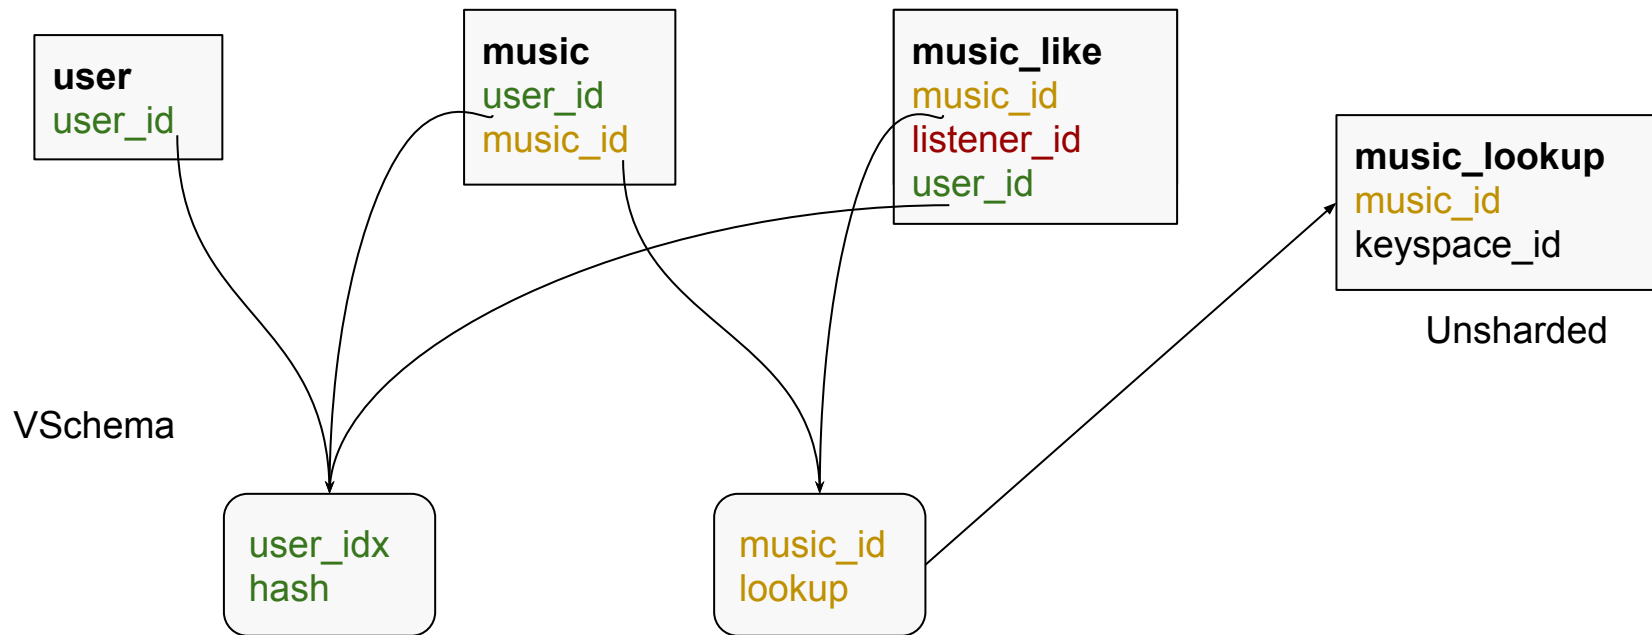

# Queries

- `select * from user where user_id=5`
- `select * from user where user_id in (1, 5)`
- `select * from music where user_id=5`
- `select * from music where music_id=2`
- `select * from music_like where music_id=2`
- `select * from user`

# Joins and subqueries

---

- Treat databases as tables
- Outsource as much as possible to the databases
- Do only wire-up work in VTGate

# Join queries

- `select u.name, m.song from user u join music m on u.user_id=m.user_id where user_id=5`
- `select m.song, u.name from music m join music_like ml on m.music_id=ml.music_id join user u on ml.listener_id=u.user_id where m.music_id=2`
  - `select m.song, ml.listener from music m join music_like ml on m.music_id=ml.music_id where m.music_id=2`
  - `select u.name from user u where u.user_id=:ml_listener`
- `select u1.name, u2.name from user u1 join user u2 on u1.user_id = u2.fan_id`

# Current limitations

---

- Cross-shard post-processing
- Cross-shard subqueries
- Any work that cannot be outsourced (other than joins)

# Distributed transactions

*“If a group of transactional engines provide a certain durability guarantee, then it’s possible to extend the same guarantee to distributed transactions that span those engines”*

## Exclusions

- Commit should be non-failable
- No internal errors
- No isolation guarantees

# The End...?

# Automated Master Election

- Orchestrator
  - by Shlomi Noach (GitHub, formerly Booking.com)
  - [github.com/outbrain/orchestrator](https://github.com/outbrain/orchestrator)

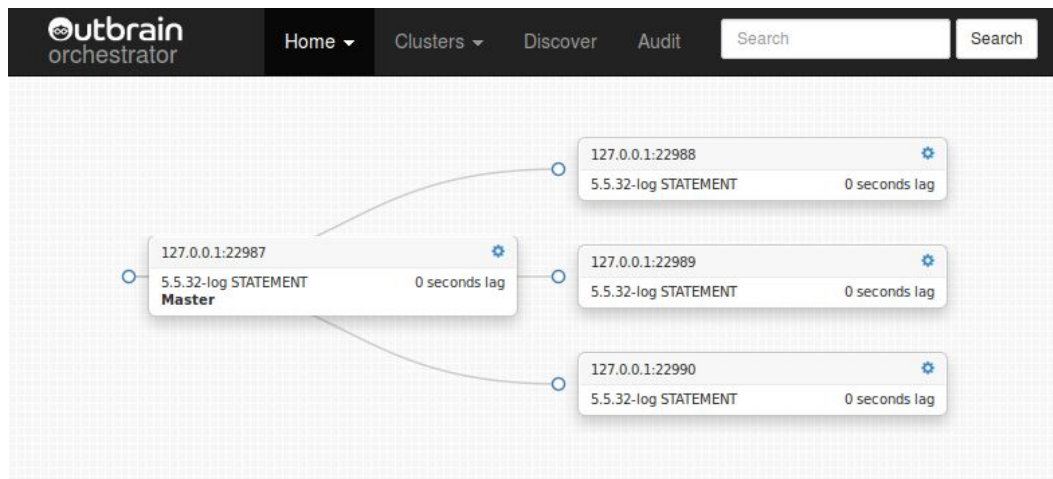



# Automated Background Schema Rollout

- For schema changes that are too slow to replicate
- Options
  - pt-online-schema-change
  - <https://github.com/square/shift>
  - Google MySQL "Pivot"

# Resources

## **Try Vitess**

[vitess.io/getting-started](https://vitess.io/getting-started)

## **Contribute**

[github.com/youtube/vitess](https://github.com/youtube/vitess)

## **Contact Us**

[vitess@googlegroups.com](mailto:vitess@googlegroups.com)

## **Get Updates**

[groups.google.com/d/forum/vitess-announce](https://groups.google.com/d/forum/vitess-announce)

[blog.vitess.io](https://blog.vitess.io)

## **Cloud Native Computing Foundation**

[cncf.io](https://cncf.io)

## **Kubernetes**

[kubernetes.io](https://kubernetes.io)

# Extra Slides

# Join example

select a.id, a.a1, b.b1 from a join b on a.n = b.n where a.id = 5

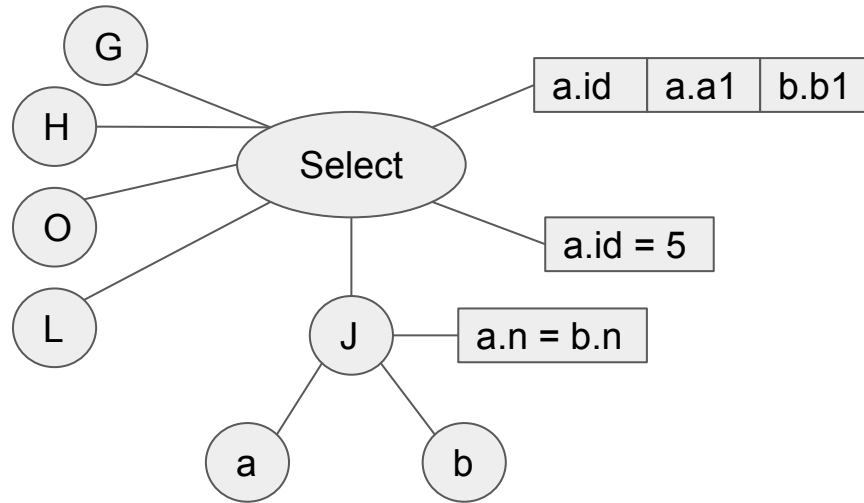

# Build plan

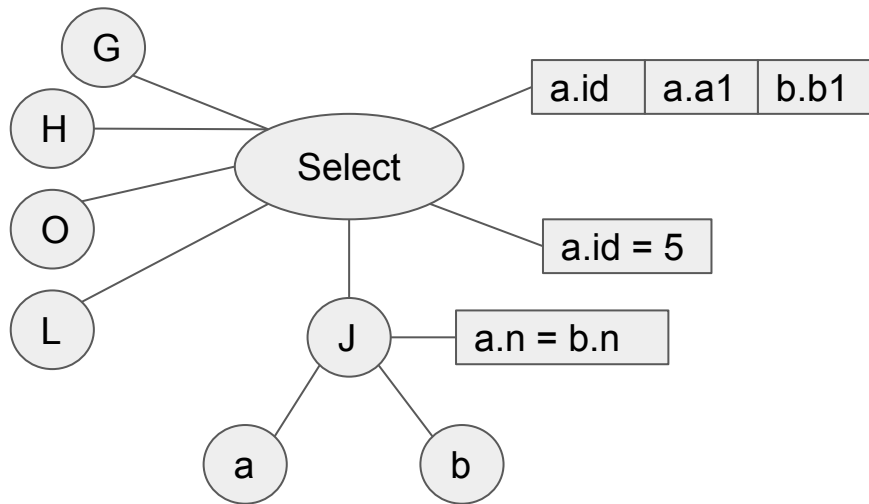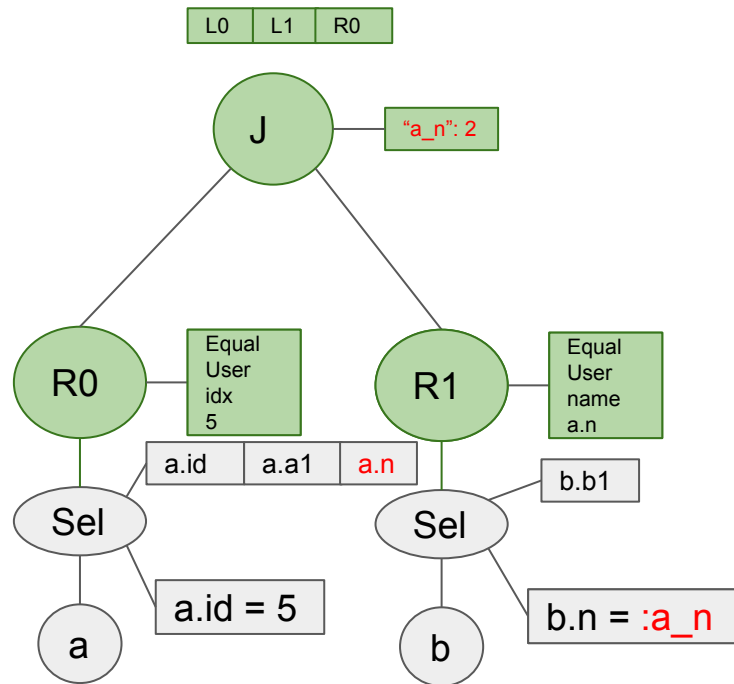

# Finalize plan

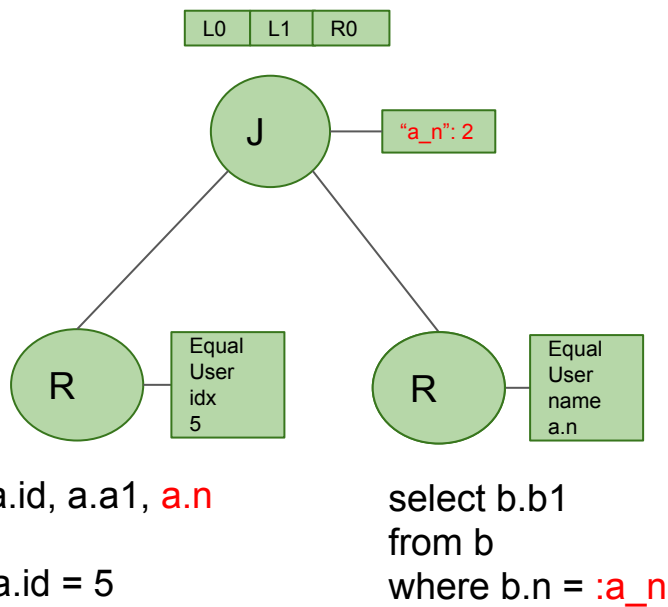

Supplement: Supplemental_longranger-2.2.zip [file percona-2016.pdf › lr2.2-public/lib/go/src/code.google.com/vitess/docs/resources/percona-2016.pdf]
