# Supplementary material for: Resolving the full spectrum of human genome variation using Linked-Reads
Source: PubMed Central journal article supplement (PMC6442396; doi:10.1101/gr.234443.118), 2019-04
Supplement: supp_gr.234443.118_Supplemental_Figures_Tables.pdf [file supp_gr.234443.118_Supplemental_Figures_Tables.pdf]

# Supplementary Figures and Tables for: Resolving the Full Spectrum of Human Genome Variation using Linked-Reads

*Patrick Marks<sup>a</sup>, Sarah Garcia<sup>a</sup>, Alvaro Martinez Barrio<sup>a</sup>, Kamila Belhocine<sup>a</sup>, Jorge Bernate<sup>a</sup>, Rajiv Bharadwaj<sup>a</sup>, Keith Bjornson<sup>a</sup>, Claudia Catalanotti<sup>a</sup>, Josh Delaney<sup>a</sup>, Adrian Fehr<sup>a</sup>, Ian T. Fiddes<sup>a</sup>, Brendan Galvin<sup>a</sup>, Haynes Heaton<sup>a,e,f</sup>, Jill Herschleb<sup>a</sup>, Christopher Hindson<sup>a</sup>, Esty Holt<sup>b</sup>, Cassandra B. Jabara<sup>a,g</sup>, Susanna Jett<sup>a,h</sup>, Nikka Keivanfar<sup>a</sup>, Sofia Kyriazopoulou-Panagiotopoulou<sup>a,i</sup>, Monkol Lek<sup>c,d</sup>, Bill Lin<sup>a</sup>, Adam Lowe<sup>a</sup>, Shazia Mahamdallie<sup>b</sup>, Shamoni Maheshwari<sup>a</sup>, Tony Makarewicz<sup>a</sup>, Jamie Marshall<sup>d</sup>, Francesca Meschi<sup>a</sup>, Chris O'keefe<sup>a</sup>, Heather Ordonez<sup>a</sup>, Pranav Patel<sup>a</sup>, Andrew Price<sup>a</sup>, Ariel Royall<sup>a</sup>, Elise Ruark<sup>b</sup>, Sheila Seal<sup>b</sup>, Michael Schnall-Levin<sup>a</sup>, Preyas Shah<sup>a</sup>, David Stafford<sup>a</sup>, Stephen Williams<sup>a</sup>, Indira Wu<sup>a</sup>, Andrew Wei Xu<sup>a</sup>, Nazneen Rahman<sup>b</sup>, Daniel MacArthur<sup>c,d</sup>, Deanna M. Church<sup>a,j</sup>*

2019-02-01 16:52:56

**Author affiliations** a: 10x Genomics, 7068 Koll Center Parkway, Suite 401, Pleasanton, CA 94566;

b: The Institute of Cancer Research, Division of Genetics & Epidemiology, 15 Cotswold Road,

London, SM2 5NG, UK; c: Analytic and Translational Genetics Unit, Massachusetts General

Hospital, Boston, MA; d: Program in Medical and Population Genetics, Broad Institute of MIT and

Harvard, Cambridge, MA; e: Current affiliation, Wellcome Trust Sanger Institute, Hinxton CB10

<sup>20</sup> 1SA, UK; f: Current affiliation, University of Cambridge, Cambridge, UK; g: Current affiliation,  
<sup>21</sup> Purigen Biosystems, Inc., 5700 Stoneridge Drive, Suite 100, Pleasanton, CA 94588; h: Current  
<sup>22</sup> affiliation, LevitasBio, Inc., 3283 25th Street, 3, San Francisco, CA 94110; i: Current affiliation,  
<sup>23</sup> Illumina, Inc., 499 Illinois Street, Suite 201, San Francisco, CA 94158; j: Current affiliation, Inscripta  
<sup>24</sup> Inc., 5500 Central Avenue #220, Boulder, CO 80301

## 25 Supplemental Figures

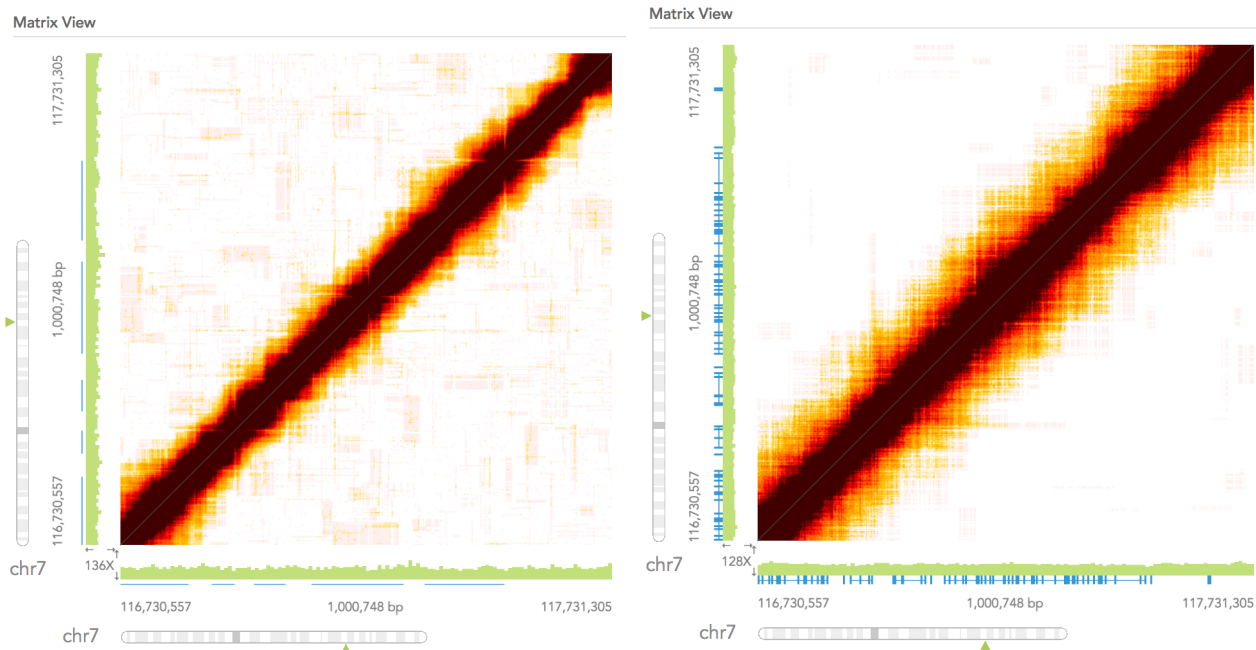

Figure 1: Improvements in Chromium Genome relative to GemCode. Loupe browser screenshots of GemCode data (left) and Chromium Genome data (right) showing barcode overlap patterns plotted between a region on chromosome 7 and itself. Overlap is strongest along the diagonal, with decreasing overlap occurring as a function of distance. Off of the diagonal there is more barcode sharing in the GemCode data (indicated by the light orange background signal) due to increased barcode collisions owing to the reduced number of barcodes and partitions in the GemCode assay.

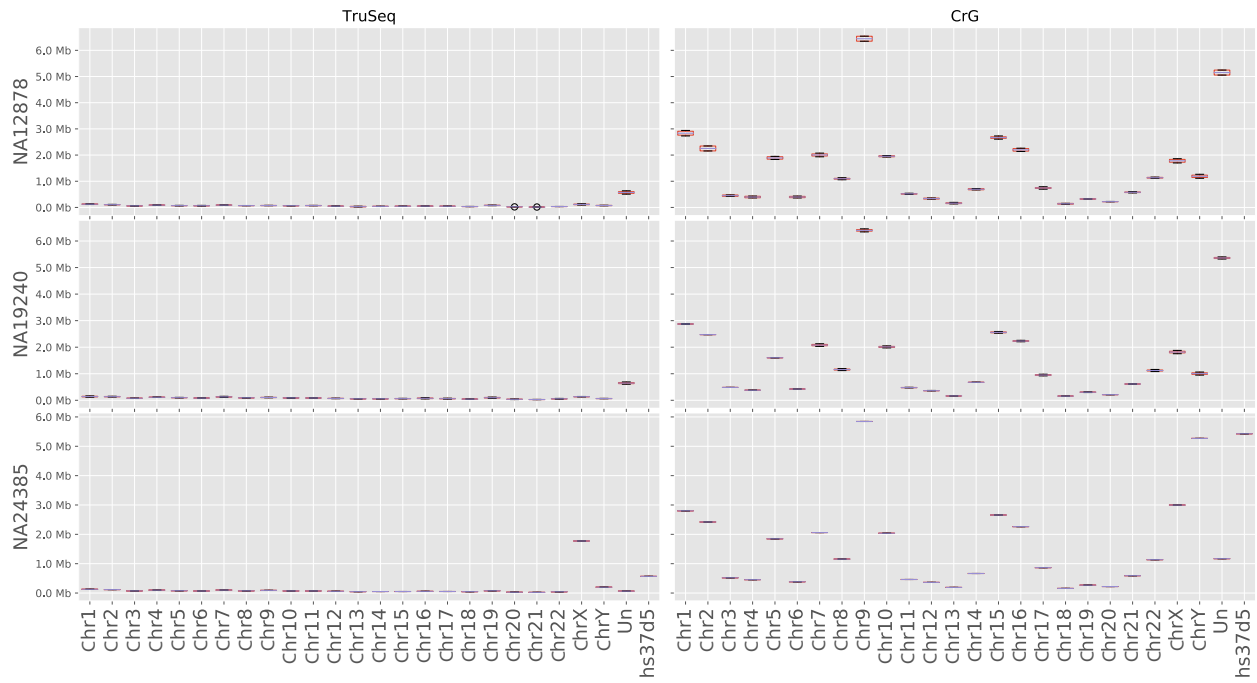

Figure 2: Uniquely aligning sequence by chromosome. Data in the left column is from PCR- TruSeq, and in the right column is lrWGS. The y-axis represents the amount of sequence covered by the unique alignments. The x-axis represents the chromosome assignment of the regions being assessed. The top row represents 4 replicates from the NA12878 sample, second row represents 2 replicates from the NA19240 sample, and the third row represents 1 replicate of NA24385.

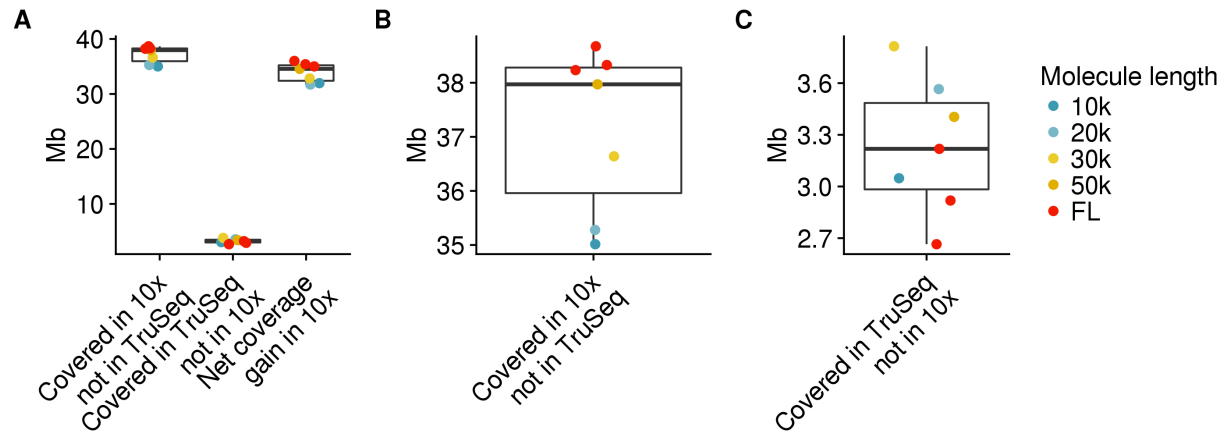

Figure 3: Increasing input molecule length improves 10x Chromium Genome alignments. The y-axis shows the amount of sequence with a coverage of  $\geq 5$  reads at mapQ30 in one genome assay but not the other. All comparisons use data from the NA12878 cell line. Panel (B) and (C) are zoomed-in views of box plots in (A).

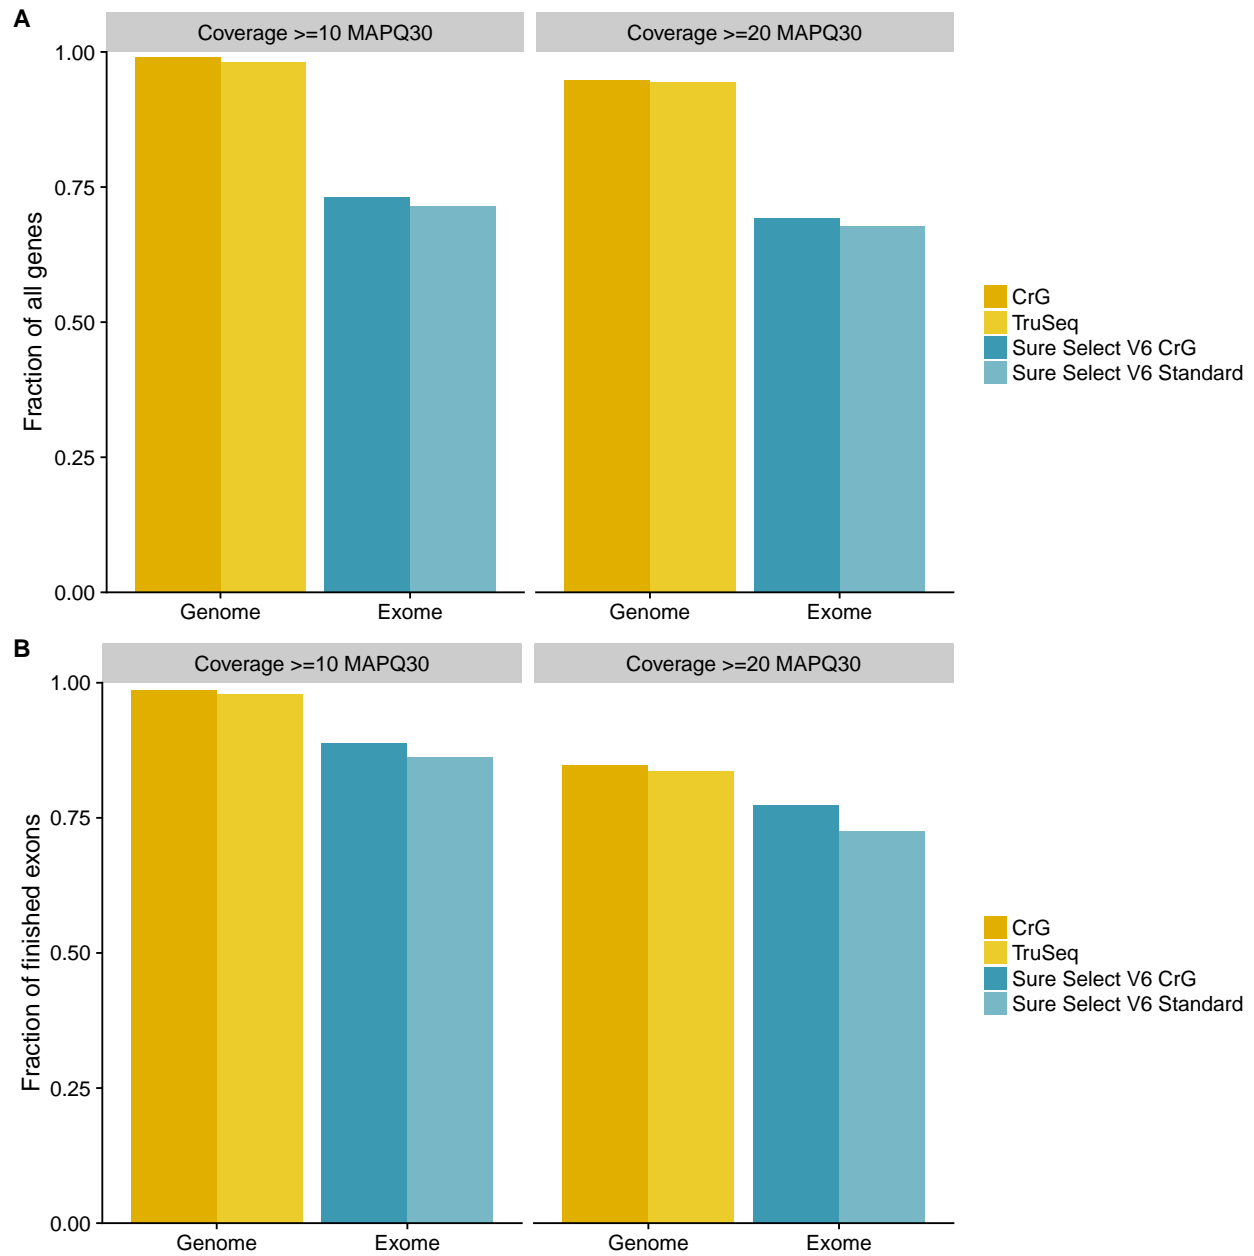

Figure 4: Improved coverage and gene finishing across the genome and exome. Upper panel shows fraction of all genes for which coverage is greater than 10 or 20 reads, with MapQ30 or greater. Lower panel shows fraction of finished exons for which more than 99 percent of bases within an exon meet the same coverage and quality metrics. In each panel, Genome is shown in yellow, Exome in blue.

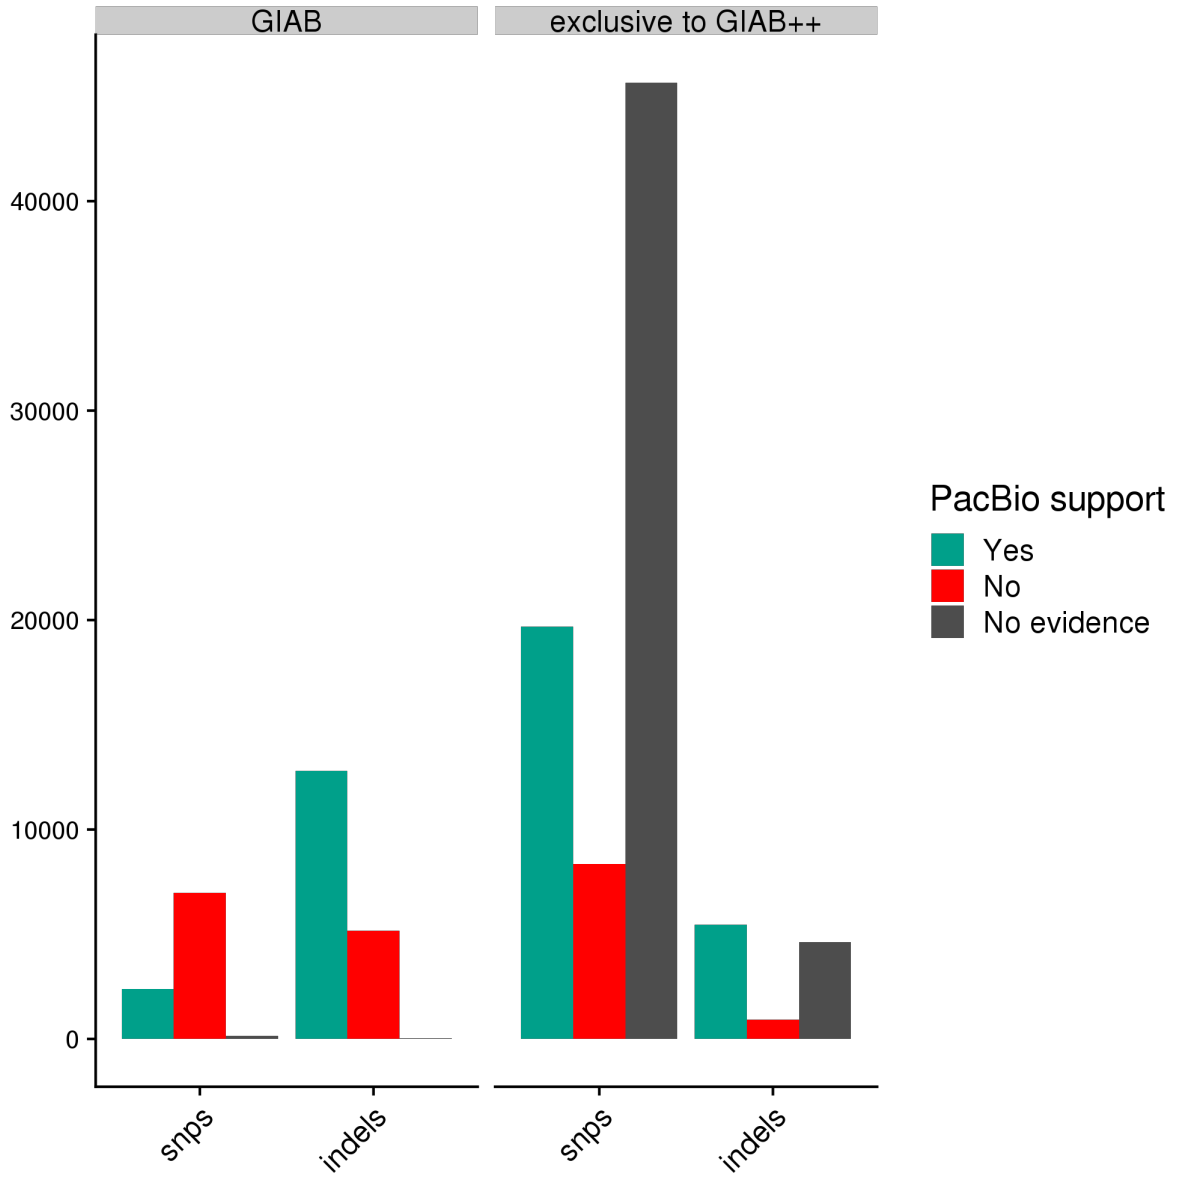

Figure 5: Many putative False Positive calls have PacBio support. On left is the number of putative false positive calls for which PacBio shows support (green), does not show support (red), or lacks coverage over the region (<10reads, grey). On right is the same analysis across the extended truth set.

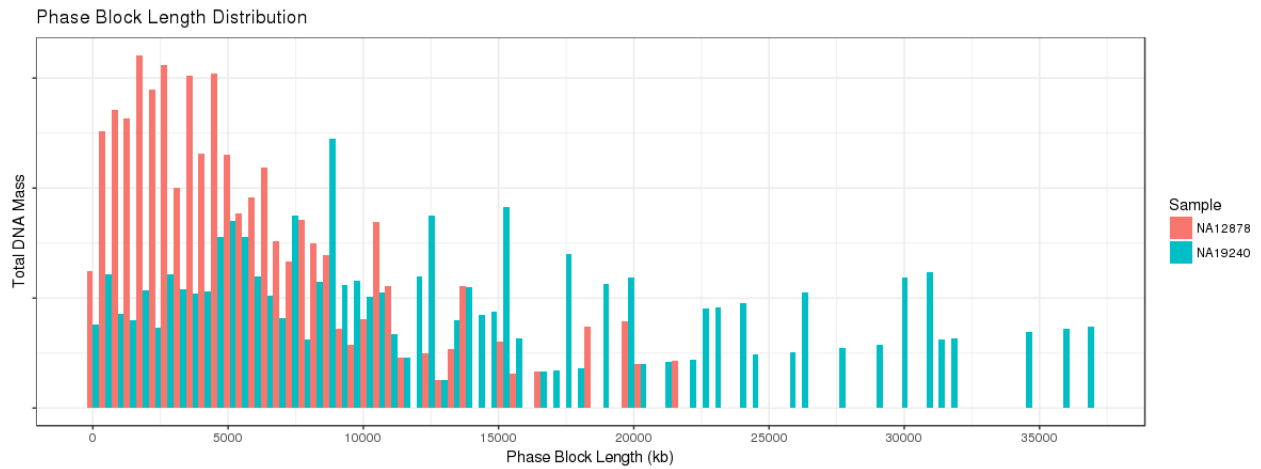

Figure 6: Phase block distribution of NA19240 and NA12878. Length weighted phase block length distribution of input molecule length matched NA12878 and NA19240. Both samples have an input molecule length around 80 kb, but the phase block length distribution is larger for NA19240 due to the increased heterozygosity in this sample. Phase block lengths for both samples were taken from the phase\_blocks.h5 file generated by Long Ranger and plotted as the length weighted histogram of phase block lengths.



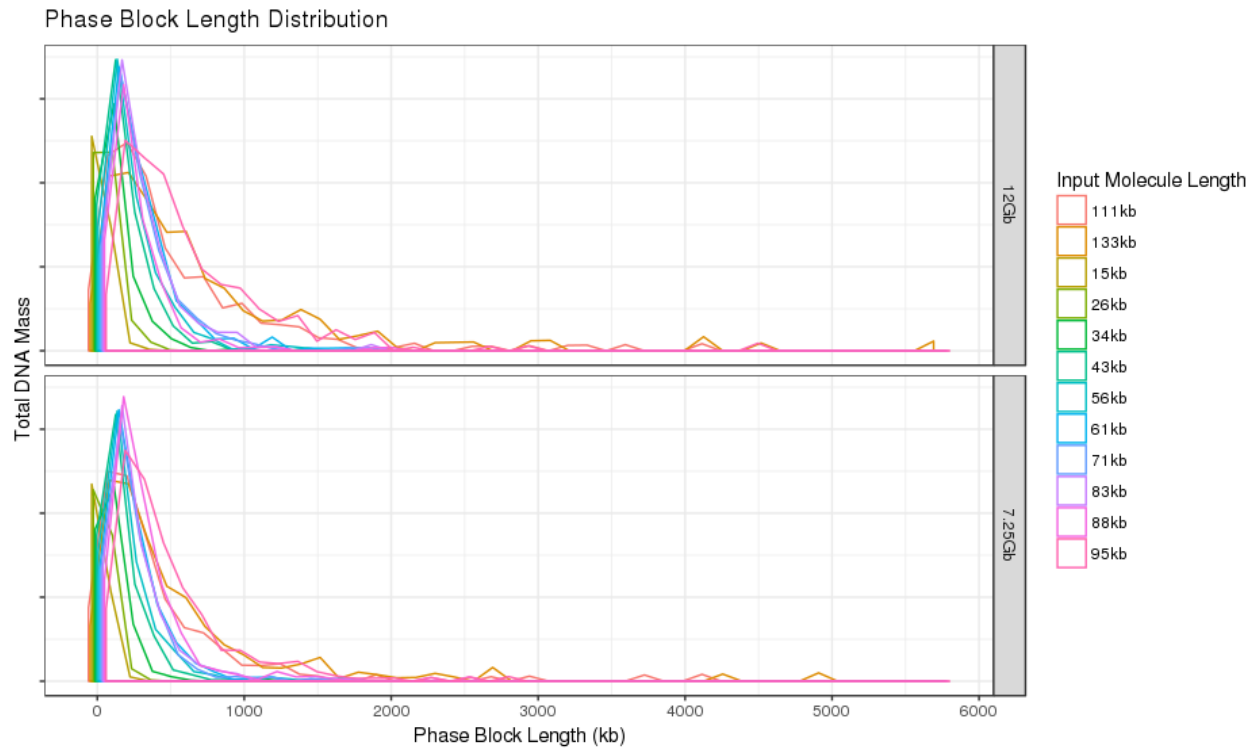

Figure 7: Impact of molecule length on phase block distributions of exome samples from individuals with inherited disease. Length weighted phase-block size distribution for clinical exome samples at 7.25 Gb and 12 Gb sequencing depth, colored by input molecule length. Longer input molecule length leads to longer phase blocks. Phase block lengths for both samples were taken from the phase\_blocks.h5 file generated by Long Ranger and plotted as the length weighted histogram of phase block lengths.

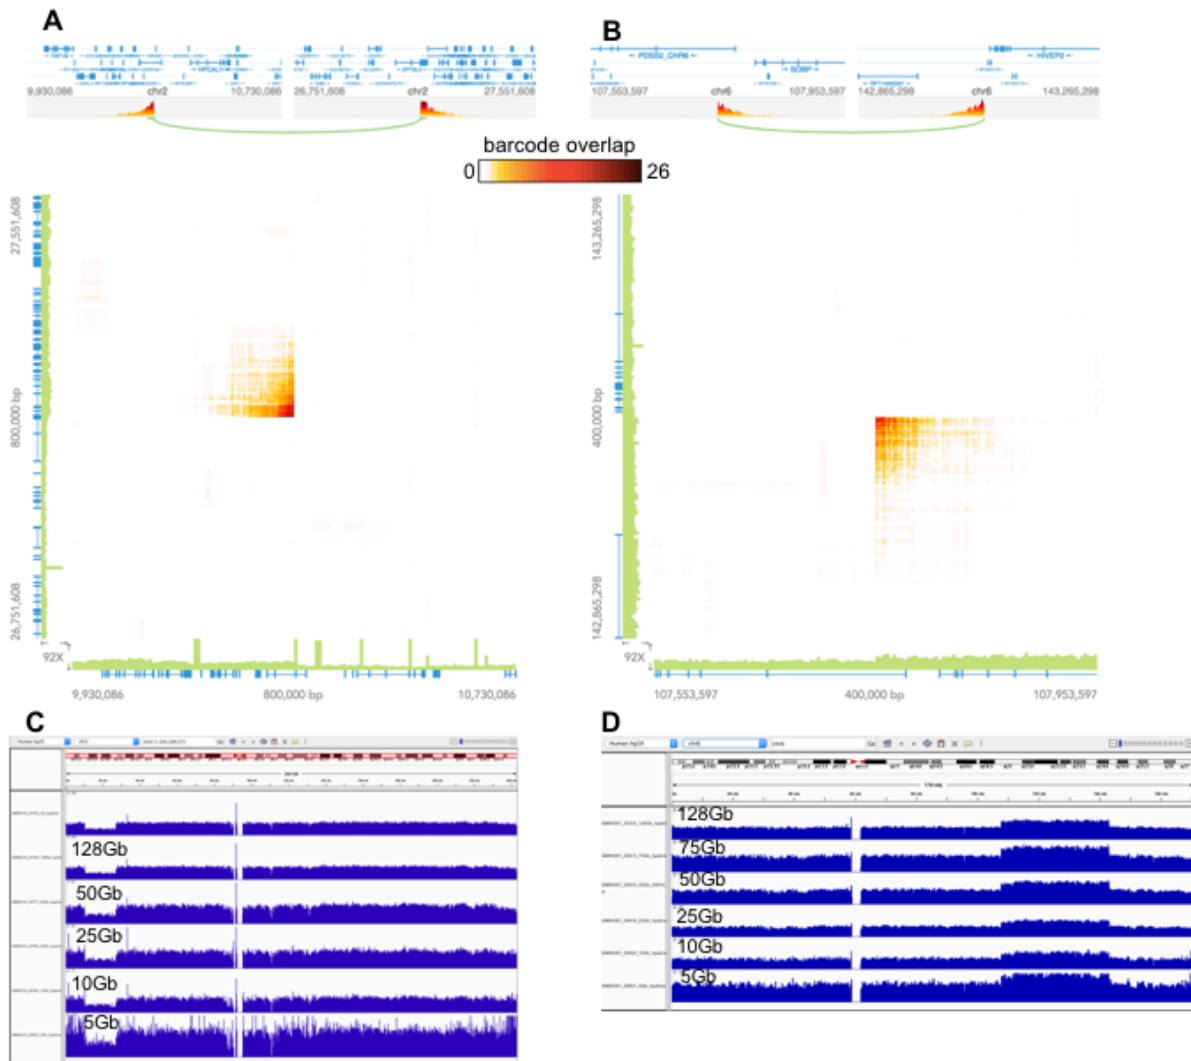

Figure 8: Copy number variants detected with barcode overlap and barcode coverage. Visualizations of a deletion event in sample GM09261: 46,XY,del(2)(p25.1p23) (A and C) and a duplication event in sample GM09367: 46,XX,dup(6)(q21q24) (B and D). A, B. Barcode overlap linear (top) and matrix (bottom) views of these events with 128 Gb sequence. These events were not called by barcode overlap at lower sequence depths. C, D. IGV tracks showing barcode coverage in the event regions with sequence depths of 128 Gb down to 5 Gb, as indicated. Both events were called by the barcode coverage method at all sequence depths tested.

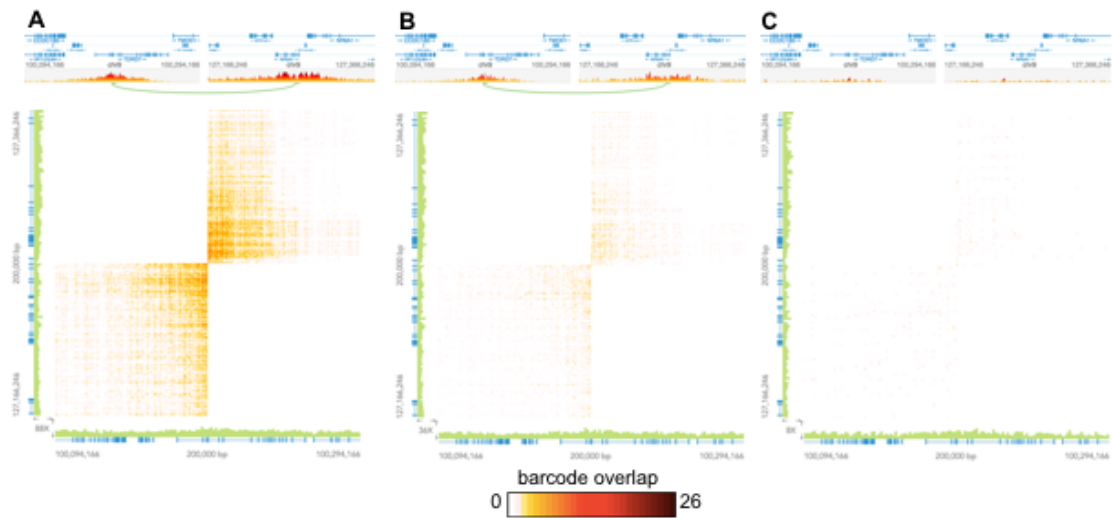

Figure 9: Detection of event for GM21075: 46,XY,inv(9)(q22.3q34.1). A. Barcode Matrix view showing a balanced inversion detected on the long arm of chromosome 9 with 128 Gb of Linked-Read sequence data. B. Barcode matrix view of the same inversion event shown with only 50 Gb of Linked-Read sequence coverage, the lowest coverage at which Long Ranger called this event. C. The same event shown with 10 Gb of Linked-Read sequence coverage showing that there is signal for this event in the data at this coverage level, even though Long Ranger does not make the definitive call.

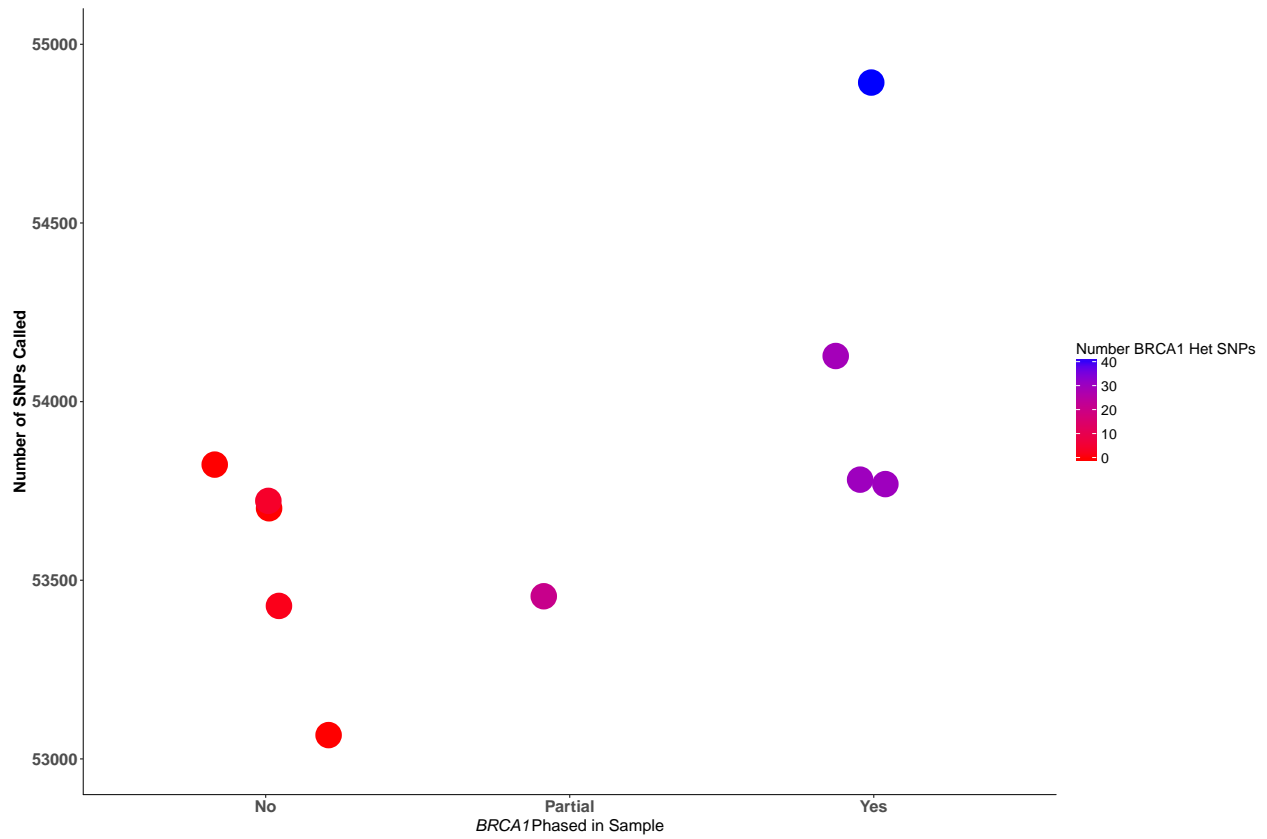

Figure 10: Comparison of variant density at the *BRCA1* locus in samples where *BRCA1* is phased vs. when it is not phased. Samples with less variation fail to phase.



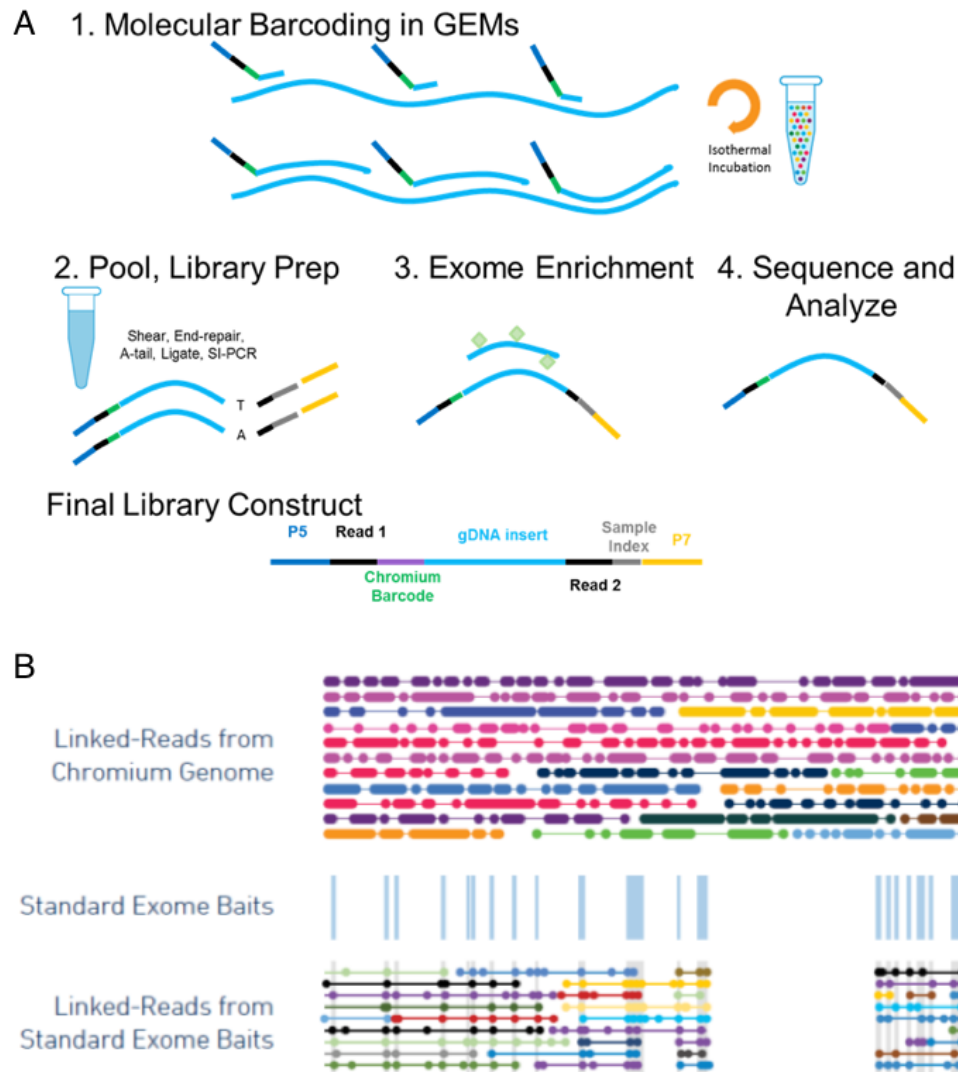

Figure 12: Exome capture scheme. A. The Chromium Exome workflow includes industry-standard library preparation steps, exome capture, and standard short-read sequencing. Barcoded gel beads are mixed with high-molecular weight DNA and enzyme mixture, then combined with an oil-surfactant solution in a double-cross microfluidic junction. Gel bead droplets are collected and dissolved, and whole-genome primer extension is initiated to generate barcoded fragments. Barcoded fragments are pooled and can be used for final library preparation. B. Exome baits can be used to isolate genic content for exome sequencing. Barcoded fragments are assembled into Linked-Reads using barcode identity and physical proximity by alignment. Linked-Reads are amenable to standard capture for maintenance of long-range phasing and/or performance over regions of interest.

Table 1: Comparison of uniquely aligning sequence per assay to genome annotation information

| Sample  | Sex | Method | Unique aligning seq | Unique in exon | % in exon | Unique in SD | % in SD | Unique in decoy | % in decoy |
|---------|-----|--------|---------------------|----------------|-----------|--------------|---------|-----------------|------------|
| NA12878 | F   | CrG    | 36454253            | 1838221        | 5.04%     | 28301860     | 77.64%  | 5054699         | 13.87%     |
| NA24385 | M   | CrG    | 44231881            | 2124519        | 4.80%     | 33896875     | 76.63%  | 5425578         | 12.27%     |
| NA19240 | F   | CrG    | 37643806            | 1849618        | 4.91%     | 28699783     | 76.24%  | 5401123         | 14.35%     |
| NA12878 | F   | Tru    | 2151952             | 109503         | 5.09%     | 635160       | 29.52%  | 591793          | 27.50%     |
| NA24385 | M   | Tru    | 4122860             | 169393         | 4.11%     | 700745       | 17.00%  | 568695          | 13.79%     |
| NA19240 | F   | Tru    | 2991088             | 175180         | 5.86%     | 690759       | 23.09%  | 690858          | 23.10%     |

<sup>26</sup> Table 1: Comparison of uniquely aligning sequence per assay to genome annotation information.  
<sup>27</sup> We took 1 replicate from each sample and compared the uniquely aligning sequence to regions  
<sup>28</sup> annotated as segmental duplication (SD), regions annotated as exonic per Ensembl annotation, or  
<sup>29</sup> the human decoy sequence (hs37d5). For each comparison, both absolute number of bases and  
<sup>30</sup> percentage of bases are provided.



Table 2: Sensitivity and Specificity

| Variable                         | CrG NA12878 | PCR- NA12878 | CrG NA24385 | PCR- NA24385 |
|----------------------------------|-------------|--------------|-------------|--------------|
| Sensitivity (het SNVs)           | 0.995       | 0.997        | 0.996       | 0.998        |
| Specificity (het SNVs)           | 0.996       | 0.998        | 0.997       | 0.999        |
| Sensitivity (het indels)         | 0.952       | 0.984        | 0.953       | 0.988        |
| Specificity (het indels)         | 0.956       | 0.987        | 0.955       | 0.990        |
| Sensitivity (homalt SNVs)        | 0.999       | 0.999        | 0.999       | 0.999        |
| Specificity (homalt SNVs)        | 0.999       | 1.000        | 0.999       | 1.000        |
| Sensitivity (homalt indels)      | 0.988       | 0.996        | 0.986       | 0.997        |
| Specificity (homalt indels)      | 0.941       | 0.974        | 0.939       | 0.975        |
| Sensitivity (het SNVs) (++)      | 0.992       | 0.994        | 0.995       | 0.997        |
| Specificity (het SNVs) (++)      | 0.970       | 0.984        | 0.966       | 0.980        |
| Sensitivity (het indels) (++)    | 0.940       | 0.974        | 0.926       | 0.983        |
| Specificity (het indels) (++)    | 0.926       | 0.966        | 0.886       | 0.939        |
| Sensitivity (homalt SNVs) (++)   | 0.998       | 0.997        | 0.999       | 0.998        |
| Specificity (homalt SNVs) (++)   | 0.982       | 0.995        | 0.977       | 0.991        |
| Sensitivity (homalt indels) (++) | 0.981       | 0.991        | 0.955       | 0.993        |
| Specificity (homalt indels) (++) | 0.918       | 0.959        | 0.882       | 0.922        |

<sup>31</sup> Table 2: Sensitivity/specificity by inferred zygosity. Hap.py was used to determine the error rate of  
<sup>32</sup> variants called by Long Ranger for NA12878 and NA24385 in both the GIAB confident regions as  
<sup>33</sup> well as the ++ confident regions. The extended summary results are tabulated here, reporting on  
<sup>34</sup> the sensitivity and specificity of heterozygous and homozygous variant calls.

Table 3: Manual review of small variant calling

| Ex | Location            | Manual<br>assessment | Quality | LR<br>genotype | GIAB<br>genotype | Supporting<br>reads/ Total<br>reads Hap1 | Supporting<br>reads/ Total<br>reads Hap2 | Supporting<br>reads/ Total<br>reads PB | Supporting<br>reads/ Total<br>reads TruSeq |
|----|---------------------|----------------------|---------|----------------|------------------|------------------------------------------|------------------------------------------|----------------------------------------|--------------------------------------------|
| 1  | chr1:569427:C:T     | TP                   | 1205.77 | 0/1            | ./.              | 15/15                                    | 25/25                                    | 7/52                                   | 13/14                                      |
| 2  | chr2:21106587:T:C   | TP                   | 578.77  | 0/1            | ./.              | 10/10                                    | 20/20                                    | 1/25                                   | 13/29                                      |
| 3  | chr2:120171025:G:A  | TP                   | 164.77  | 0/1            | ./.              | 0/20                                     | 15/16                                    | 0/41                                   | 22/53                                      |
| 4  | chr1:91227215:G:A   | FP                   | 673.77  | 0/1            | 1/1              | 0                                        | 0                                        | 42/43                                  | 36/36                                      |
| 5  | chr1:174312140:G:A  | FP                   | 190.77  | 0/1            | ./.              | 0/12                                     | 0/5                                      | 2/49                                   | 1/36                                       |
| 6  | chr10:31964340:G:C  | TP                   | 606.77  | 0/1            | ./.              | 0/14                                     | 9/9                                      | 0/60                                   | 9/33                                       |
| 7  | chr10:120532871:T:A | FP                   | 127.77  | 0/1            | ./.              | 0/0                                      | 0/0                                      | 2/50                                   | 0/22                                       |
| 8  | chr13:69502758:G:T  | FP                   | 391.77  | 0/1            | ./.              | 0/0                                      | 0/0                                      | 1/55                                   | 0/21                                       |
| 9  | chr14:59356314:C:A  | TP                   | 678.78  | 1 1            | 0/1              | 0/1                                      | 3/3                                      | 34/52                                  | 21/21                                      |
| 10 | chr15:72150190:T:C  | FP                   | 67.77   | 0/1            | ./.              | 4/7                                      | 0/17                                     | 0/48                                   | 6/38                                       |
| 11 | chr17:1132584:C:T   | TP                   | 415.77  | 1/1            | 0/1              | 0/6                                      | 4/4                                      | 19/47                                  | 10/24                                      |
| 12 | chr18:4101856:G:A   | FP                   | 85.77   | 0/1            | ./.              | 4/24                                     | 1/14                                     | 0/49                                   | 1/23                                       |
| 13 | chr18:41688063:G:A  | TP                   | 733.77  | 0/1            | ./.              | 11/11                                    | 0/16                                     | 3/48                                   | 13/25                                      |
| 14 | chr19:16496584:T:A  | FP                   | 60      | 0/1            | ./.              | 0/7                                      | 0/6                                      | 0/63                                   | 4/31                                       |
| 15 | chr2:10614364:G:A   | TP                   | 161.77  | 0/1            | ./.              | 0/13                                     | 16/16                                    | 5/34                                   | 16/30                                      |
| 16 | chr2:120171060:A:C  | TP                   | 198.77  | 0/1            | ./.              | 0/25                                     | 16/16                                    | 1/42                                   | 24/59                                      |
| 17 | chr2:153864925:A:G  | TP                   | 101.77  | 0/1            | ./.              | 0/9                                      | 2/2                                      | 13/33                                  | 0/4                                        |
| 18 | chr2:242916020:T:C  | TP                   | 450.77  | 0/1            | 1/1              | 9/9                                      | 0/13                                     | 15/45                                  | 8/21                                       |
| 19 | chr3:8963428:C:T    | FP                   | 76.77   | 0/1            | ./.              | 0/0                                      | 0/0                                      | 0/38                                   | 1/25                                       |
| 20 | chr3:119160680:G:A  | TP                   | 429.77  | 0/1            | ./.              | 8/8                                      | 0/17                                     | 5/49                                   | 14/26                                      |
| 21 | chr4:65497558:A:C   | TP                   | 547.77  | 0/1            | ./.              | 0/16                                     | 12/12                                    | 0/37                                   | 14/39                                      |

Table 3: Manual review of small variant calling (*continued*)

| Ex | Location          | Manual<br>assessment | Quality | LR<br>genotype | GIAB<br>genotype | Supporting<br>reads/ Total<br>reads Hap1 | Supporting<br>reads/ Total<br>reads Hap2 | Supporting<br>reads/ Total<br>reads PB | Supporting<br>reads/ Total<br>reads TruSeq |
|----|-------------------|----------------------|---------|----------------|------------------|------------------------------------------|------------------------------------------|----------------------------------------|--------------------------------------------|
| 22 | chr5:8079967:A:G  | ?                    | 1174    | 0/1            | 1/1              | ~200/202                                 | ~200/200                                 | 42/47                                  | 28/28                                      |
| 23 | chr5:72174473:G:A | FP                   | 67.77   | 0/1            | ./.              | 1/10                                     | 4/16                                     | 0/42                                   | 0/23                                       |
| 24 | chr6:19909664:A:C | FP                   | 367.77  | 0/1            | ./.              | 0/22                                     | 0/10                                     | 0/67                                   | 0/24                                       |
| 25 | chr7:2406995:A:C  | FP                   | 45.77   | 0/1            | ./.              | 0/7                                      | 0/5                                      | 1/38                                   | 3/27                                       |

35 Table 3: Manual review of small variant calling. Linked-Reads alignments made with Long Ranger  
36 using GATK, PacBio alignments and PCR-free TruSeq alignments made with BWA were loaded to  
37 IGV for manual inspection. Columns are: 1) Number; 2) Location; 3) Manual assessment of call; 4)  
38 Quality score of variant call from the VCF; 5) Long Ranger called genotype; 6) GIAB called  
39 genotype; 7) Read support for call in Haplotype 1; 8) Read support for call in Haploypye 2; 9) Read  
40 support for call in PacBio; 10) Read support for call in PCR-free TruSeq; 11) File with screenshot of  
41 review.

Table 4: Summary of phasing accuracy analysis for lrWGS control samples

| Sample  | Phase Block N <sub>50</sub> (bp) | Long Switch<br>Error Rate | Short Switch<br>Error Rate | Fraction<br>Correct in<br>Phase Block | Fraction<br>Correct in<br>Gene |
|---------|----------------------------------|---------------------------|----------------------------|---------------------------------------|--------------------------------|
| NA12878 | 9424660                          | 0                         | 0                          | 0.986                                 | 0.999                          |
| NA12878 | 6539869                          | 0                         | 0                          | 0.976                                 | 1.000                          |

Table 5: Gene, variant distance, and RVSI score for clinically-relevant genes

| Sample  | Gene  | Var1                | Var2                               | Variant distance | RVIS score | RVIS percent | Molecule length | Variant phased |
|---------|-------|---------------------|------------------------------------|------------------|------------|--------------|-----------------|----------------|
| B12-38  | DYSF  | chr2:71,778,243dupT | chr2:71,817,342_71,817,343delinsAA | 39,097 bp        | -1.31      | 4.65%        | 13,553 bp       | No             |
| B12-38  | DYSF  | chr2:71,778,243dupT | chr2:71,817,342_71,817,343delinsAA | 39,097 bp        | -1.31      | 4.65%        | 16,911 bp       | No             |
| B12-38  | DYSF  | chr2:71,778,243dupT | chr2:71,817,342_71,817,343delinsAA | 39,097 bp        | -1.31      | 4.65%        | 18,439 bp       | No             |
| B12-38  | DYSF  | chr2:71,778,243dupT | chr2:71,817,342_71,817,343delinsAA | 39,097 bp        | -1.31      | 4.65%        | 18,461 bp       | Yes            |
| B12-38  | DYSF  | chr2:71,778,243dupT | chr2:71,817,342_71,817,343delinsAA | 39,097 bp        | -1.31      | 4.65%        | 19,309 bp       | Yes            |
| B12-38  | DYSF  | chr2:71,778,243dupT | chr2:71,817,342_71,817,343delinsAA | 39,097 bp        | -1.31      | 4.65%        | 21,226 bp       | Yes            |
| B12-38  | DYSF  | chr2:71,778,243dupT | chr2:71,817,342_71,817,343delinsAA | 39,097 bp        | -1.31      | 4.65%        | 34,800 bp       | Yes            |
| B12-38  | DYSF  | chr2:71,778,243dupT | chr2:71,817,342_71,817,343delinsAA | 39,097 bp        | -1.31      | 4.65%        | 42,939 bp       | Yes            |
| B12-38  | DYSF  | chr2:71,778,243dupT | chr2:71,817,342_71,817,343delinsAA | 39,097 bp        | -1.31      | 4.65%        | 85,077 bp       | Yes            |
| B12-38  | DYSF  | chr2:71,778,243dupT | chr2:71,817,342_71,817,343delinsAA | 39,097 bp        | -1.31      | 4.65%        | 88,410 bp       | Yes            |
| B12-38  | DYSF  | chr2:71,778,243dupT | chr2:71,817,342_71,817,343delinsAA | 39,097 bp        | -1.31      | 4.65%        | 119,747 bp      | Yes            |
| B12-38  | DYSF  | chr2:71,778,243dupT | chr2:71,817,342_71,817,343delinsAA | 39,097 bp        | -1.31      | 4.65%        | 130,101 bp      | Yes            |
| B12-112 | POMT2 | chr14:77,745,107A>G | chr14:77,778,305C>T                | 33,198 bp        | -0.93      | 9.68%        | 10,609 bp       | No             |
| B12-112 | POMT2 | chr14:77,745,107A>G | chr14:77,778,305C>T                | 33,198 bp        | -0.93      | 9.68%        | 12277 bp        | No             |
| B12-112 | POMT2 | chr14:77,745,107A>G | chr14:77,778,305C>T                | 33,198 bp        | -0.93      | 9.68%        | 15,536 bp       | No             |
| B12-112 | POMT2 | chr14:77,745,107A>G | chr14:77,778,305C>T                | 33,198 bp        | -0.93      | 9.68%        | 16,546 bp       | No             |
| B12-112 | POMT2 | chr14:77,745,107A>G | chr14:77,778,305C>T                | 33,198 bp        | -0.93      | 9.68%        | 20,782 bp       | No             |
| B12-112 | POMT2 | chr14:77,745,107A>G | chr14:77,778,305C>T                | 33,198 bp        | -0.93      | 9.68%        | 21,106 bp       | No             |
| B12-112 | POMT2 | chr14:77,745,107A>G | chr14:77,778,305C>T                | 33,198 bp        | -0.93      | 9.68%        | 21,858 bp       | No             |
| B12-112 | POMT2 | chr14:77,745,107A>G | chr14:77,778,305C>T                | 33,198 bp        | -0.93      | 9.68%        | 54,569 bp       | Yes            |
| B12-112 | POMT2 | chr14:77,745,107A>G | chr14:77,778,305C>T                | 33,198 bp        | -0.93      | 9.68%        | 55,546 bp       | Yes            |
| B12-112 | POMT2 | chr14:77,745,107A>G | chr14:77,778,305C>T                | 33,198 bp        | -0.93      | 9.68%        | 107,082 bp      | Yes            |

Table 5: Gene, variant distance, and RVSI score for clinically-relevant genes (*continued*)

| Sample  | Gene  | Var1                | Var2                | Variant distance | RVIS score | RVIS percent | Molecule length | Variant phased |
|---------|-------|---------------------|---------------------|------------------|------------|--------------|-----------------|----------------|
| B12-112 | POMT2 | chr14:77,745,107A>G | chr14:77,778,305C>T | 33,198 bp        | -0.93      | 9.68%        | 112,692 bp      | Yes            |
| B12-21  | TTN   | chr2:179,585,773C>A | chr2:179,531,966C>A | 53,807 bp        | 2.17       | 98.04%       | 17,432 bp       | Yes            |
| B12-21  | TTN   | chr2:179,585,773C>A | chr2:179,531,966C>A | 53,807 bp        | 2.17       | 98.04%       | 18,128 bp       | Yes            |
| B12-21  | TTN   | chr2:179,585,773C>A | chr2:179,531,966C>A | 53,807 bp        | 2.17       | 98.04%       | 18,158 bp       | Yes            |
| B12-21  | TTN   | chr2:179,585,773C>A | chr2:179,531,966C>A | 53,807 bp        | 2.17       | 98.04%       | 20,756 bp       | Yes            |
| B12-21  | TTN   | chr2:179,585,773C>A | chr2:179,531,966C>A | 53,807 bp        | 2.17       | 98.04%       | 28,799 bp       | Yes            |
| B12-21  | TTN   | chr2:179,585,773C>A | chr2:179,531,966C>A | 53,807 bp        | 2.17       | 98.04%       | 29,796 bp       | Yes            |
| B12-21  | TTN   | chr2:179,585,773C>A | chr2:179,531,966C>A | 53,807 bp        | 2.17       | 98.04%       | 47,443 bp       | Yes            |
| B12-21  | TTN   | chr2:179,585,773C>A | chr2:179,531,966C>A | 53,807 bp        | 2.17       | 98.04%       | 63,218 bp       | Yes            |
| B12-21  | TTN   | chr2:179,585,773C>A | chr2:179,531,966C>A | 53,807 bp        | 2.17       | 98.04%       | 64,199 bp       | Yes            |
| B12-21  | TTN   | chr2:179,585,773C>A | chr2:179,531,966C>A | 53,807 bp        | 2.17       | 98.04%       | 67,034 bp       | Yes            |
| B12-21  | TTN   | chr2:179,585,773C>A | chr2:179,531,966C>A | 53,807 bp        | 2.17       | 98.04%       | 90,767 bp       | Yes            |
| B12-21  | TTN   | chr2:179,585,773C>A | chr2:179,531,966C>A | 53,807 bp        | 2.17       | 98.04%       | 93,253 bp       | Yes            |
| UC-394  | TTN   | chr2:179,584,098C>T | chr2:179,395,221T>A | 188,877 bp       | 2.17       | 98.04%       | 13,118 bp       | Yes            |
| UC-394  | TTN   | chr2:179,584,098C>T | chr2:179,395,221T>A | 188,877 bp       | 2.17       | 98.04%       | 16,791 bp       | No             |
| UC-394  | TTN   | chr2:179,584,098C>T | chr2:179,395,221T>A | 188,877 bp       | 2.17       | 98.04%       | 18,192 bp       | No             |
| UC-394  | TTN   | chr2:179,584,098C>T | chr2:179,395,221T>A | 188,877 bp       | 2.17       | 98.04%       | 18,841 bp       | No             |
| UC-394  | TTN   | chr2:179,584,098C>T | chr2:179,395,221T>A | 188,877 bp       | 2.17       | 98.04%       | 28,033 bp       | No             |
| UC-394  | TTN   | chr2:179,584,098C>T | chr2:179,395,221T>A | 188,877 bp       | 2.17       | 98.04%       | 30,653 bp       | No             |
| UC-394  | TTN   | chr2:179,584,098C>T | chr2:179,395,221T>A | 188,877 bp       | 2.17       | 98.04%       | 32,530 bp       | No             |
| UC-394  | TTN   | chr2:179,584,098C>T | chr2:179,395,221T>A | 188,877 bp       | 2.17       | 98.04%       | 69,939 bp       | Yes            |
| UC-394  | TTN   | chr2:179,584,098C>T | chr2:179,395,221T>A | 188,877 bp       | 2.17       | 98.04%       | 87,045 bp       | Yes            |

Table 5: Gene, variant distance, and RVISI score for clinically-relevant genes (*continued*)

| Sample | Gene | Var1                | Var2                | Variant distance | RVIS score | RVIS percent | Molecule length | Variant phased |
|--------|------|---------------------|---------------------|------------------|------------|--------------|-----------------|----------------|
| UC-394 | TTN  | chr2:179,584,098C>T | chr2:179,395,221T>A | 188,877 bp       | 2.17       | 98.04%       | 88,605 bp       | Yes            |
| UC-394 | TTN  | chr2:179,584,098C>T | chr2:179,395,221T>A | 188,877 bp       | 2.17       | 98.04%       | 89,863 bp       | Yes            |



42 Table 5: Gene, variant distance, and RVSI score for clinically-relevant genes. Impact of molecule  
43 length and constraint on the ability of Linked-Reads to phase causative variants. As molecule  
44 length increases within a sample, the likelihood that two causative variants will be phased relative  
45 to each other also increases. However, genes that are not highly constrained (e.g. *TTN*) are more  
46 likely to show phasing between distant variants at small molecule lengths because more  
47 heterozygous variants are likely to occur between those variants than in highly constrained genes.

Table 6: Structural variant calls

|                        | NA12878 | NA12878 | SVClassify | PacBio  | PacBio  | PacBio |
|------------------------|---------|---------|------------|---------|---------|--------|
|                        | lrWGS   | lrWGS   |            | MtSinai | MtSinai | NGMLR  |
|                        | (ALL)   | (PASS)  |            | (ALL)   | (PASS)  | (PASS) |
| total SVs              | 9923    | 4573    | 2676       | 38839   | 10310   | 22877  |
| total DEL >30Kb        | 293     | 17      | 11         | 101     | 23      | 36     |
| total DEL <30Kb        | 4569    | 4512    | 2665       | 20856   | 4472    | 9897   |
| total INS >30Kb        | NA      | NA      | NA         | 14      | 6       | NA     |
| total INS <30Kb        | NA      | NA      | NA         | 17868   | 5809    | 12052  |
| total INV >30Kb        | 2287    | 4       | NA         | NA      | NA      | 57     |
| total INV <30Kb        | 0       | 0       | NA         | NA      | NA      | 93     |
| total DUP >30Kb        | 288     | 6       | NA         | NA      | NA      | 9      |
| total DUP <30Kb        | 0       | 0       | NA         | NA      | NA      | 594    |
| total UNK >30Kb        | 1078    | 2       | NA         | NA      | NA      | NA     |
| total UNK <30Kb        | 0       | 0       | NA         | NA      | NA      | NA     |
| total DISTAL >30Kb     | 1380    | 8       | NA         | NA      | NA      | NA     |
| total DISTAL <30Kb     | 28      | 24      | NA         | NA      | NA      | NA     |
| total TRA >30Kb        | NA      | NA      | NA         | NA      | NA      | 119    |
| total DUP/INS <30Kb    | NA      | NA      | NA         | NA      | NA      | 8      |
| total INVDUP <30Kb     | NA      | NA      | NA         | NA      | NA      | 12     |
| total INV/INVDUP <30Kb | NA      | NA      | NA         | NA      | NA      | NA     |
| total DEL/INS <30Kb    | NA      | NA      | NA         | NA      | NA      | NA     |

<sup>48</sup> Table 6: Structural variant calls and ground truth. Columns correspond to datasets generated for  
<sup>49</sup> this article or by other groups that can be used as ground truth. The row segmentation  
<sup>50</sup> corresponds to SVs larger or equal to 30Kb and smaller than that size. This segmentation  
<sup>51</sup> corresponds to the SVs reported in Long Ranger's large\_sv.vcf and dels.vcf, respectively.

Table 7: Mendelian analysis

| Locus                    | NA12878 | NA12892 | NA12891 | In svclassify? | Classification | Description                                                                                                |
|--------------------------|---------|---------|---------|----------------|----------------|------------------------------------------------------------------------------------------------------------|
| chr1:72766325-72811837   | 1 1     | 1 1     | 1 1     | Yes            | TP             | NA                                                                                                         |
| chr1:15255548-152587734  | 0 1     | -       | 1 1     | Yes            | TP             | NA                                                                                                         |
| chr2:34695837-34736559   | 1 0     | 0 1     | 1 1     | Yes            | TP             | NA                                                                                                         |
| chr2:52749692-52785263   | 1 1     | 0 1     | 1 1     | Yes            | TP             | NA                                                                                                         |
| chr3:129763385-129806737 | 1 1     | 1 1     | 1 0     | Yes            | TP             | NA                                                                                                         |
| chr3:162512134-162626333 | 1 0     | 0 1     | 1 1     | Yes            | TP             | NA                                                                                                         |
| chr4:34779956-34828940   | 0 1     | 0 1     | 0 1     | Yes            | TP             | NA                                                                                                         |
| chr5:104432114-104503672 | 1 0     | 1 0     | -       | Yes            | TP             | NA                                                                                                         |
| chr1:189690000-189790000 | 0/1     | 1 0     | -       | No             | likely-FP      | Deletion super-setting the loci below. Breakpoint disagreement with mother<br>(chr1:189704514-189783350)   |
| chr1:189704517-189783347 | 1 0     | 1 0     | -       | No             | TP             | Breakpoint agreement with mother<br>(chr1:189704514-189783350)                                             |
| chr11:55360000-55490000  | 0/1     | -       | 0/1     | No             | Complex        | Different 3' breakpoint with father<br>(chr11:55360000-55430000), Overlaps inheritance consistent UNK call |
| chr2:242900000-243080000 | 0/1     | -       | -       | No             | likely-FP      | Missing inheritance support                                                                                |
| chr20:1561086-1594155    | 0 1     | 1 1     | -       | No             | TP             | NA                                                                                                         |
| chr4:161043706-161074850 | 1 0     | -       | 1 0     | No             | TP             | NA                                                                                                         |
| chr6:67008738-67048908   | 1 0     | 1 0     | -       | No             | TP             | NA                                                                                                         |
| chr6:78967204-79036470   | 0 1     | -       | 0 1     | No             | TP             | NA                                                                                                         |
| chr8:39232084-39387222   | 1 0     | 1 0     | -       | No             | TP             | NA                                                                                                         |

<sup>52</sup> Table 7: Description of structural variant calls unique to svclassify or Long Ranger. Calls were  
<sup>53</sup> compared to Long Ranger calls made in NA12878, NA12892, NA12891 and manually reviewed.

Table 8: Coriell samples

| X1                    | X2                     | Samples                                                                     | Event in Sample         | Barcode<br>Coverage | Barcode<br>Overlap | Both<br>Methods |
|-----------------------|------------------------|-----------------------------------------------------------------------------|-------------------------|---------------------|--------------------|-----------------|
| Copy Number<br>Losses | Terminal<br>Events     | GM06936: 46,XX,del(10)(p13>qter)                                            | Deletion                | Yes                 | No†                | Yes             |
| .                     | .                      | GM10989: 46,XY,del(9)(p23)                                                  | Deletion                | Yes                 | No†                | Yes             |
| .                     | .                      | GM20027: 45,X                                                               | Aneuploidy              | Yes                 | No†                | Yes             |
| .                     | .                      | GM21886: 46,XY,r(18)(p11q21)                                                | Ring chromosome         | Yes                 | No†                | Yes             |
| .                     | .                      | GM06226*: 46,XY,der(1)t(1;16)(q44;p12)mat                                   | Derivative chromosome   | Yes                 | No†                | Yes             |
| .                     | .                      | GM21699*: 46,XY,der(6)t(3;6)(p26;q26)                                       | Derivative chromosome   | Yes                 | No†                | Yes             |
| .                     | .                      | GM14485*:<br>46,XY,der(8)del(8)(p23.3)dup(8)(p23.1-<br>>p11.2::p23.1->qter) | Derivative chromosome   | Yes                 | No†                | Yes             |
| Copy Number<br>Losses | Non-Terminal<br>Events | GM09888: 46,XX,del(8)(q23q24.1)                                             | Deletion                | Yes                 | Yes                | Yes             |
| .                     | .                      | GM14164: 46,XX,del(13)(q13q32)                                              | Deletion                | Yes                 | Yes                | Yes             |
| .                     | .                      | GM09216: 46,XY,del(2)(p25.1p23)                                             | Deletion                | Yes                 | Yes                | Yes             |
| .                     | .                      | GM10925‡: 46,XY,del(7)(p14p12)                                              | Deletion                | No                  | Yes                | Yes             |
| Copy Number<br>Gains  | Terminal<br>Events     | GM05966:<br>46,XY,dup(14)(pter->q24::q22->qter)                             | Duplication             | Yes                 | No†                | Yes             |
| .                     | .                      | GM01416: 48,XXXX                                                            | Aneuploidy              | Yes                 | No†                | Yes             |
| .                     | .                      | GM05067: 47,XY,+del(9)(q11)mat                                              | Partial Aneuploidy      | Yes                 | No†                | Yes             |
| .                     | .                      | GM16362: 47,XY,+del(22)(q11.2q13.3)                                         | Partial Aneuploidy      | Yes                 | No†                | Yes             |
| .                     | .                      | GM20556: 47,XY,+idic(15)(q13)                                               | Isodicentric chromosome | Yes                 | No†                | Yes             |
| .                     | .                      | GM06870: 47,XX,+i(18)(p10)                                                  | Isodicentric chromosome | Yes                 | No†                | Yes             |

Table 8: Coriell samples (*continued*)

| X1                     | X2                     | Samples                                                                                   | Event in Sample        | Barcode<br>Coverage | Barcode<br>Overlap | Both<br>Methods |
|------------------------|------------------------|-------------------------------------------------------------------------------------------|------------------------|---------------------|--------------------|-----------------|
| .                      | .                      | GM06226*: 46,XY,der(1)t(1;16)(q44;p12)mat                                                 | Derivative chromosome  | Yes                 | No†                | Yes             |
| .                      | .                      | GM21699*: 46,XY,der(6)t(3;6)(p26;q26)                                                     | Derivative chromosome  | Yes                 | No†                | Yes             |
| .                      | .                      | GM14485*:<br>46,XY,der(8)del(8)(p23.3)dup(8)(:p23.1-<br>>p11.2::p23.1->qter)              | Derivative chromosome  | Yes                 | No†                | Yes             |
| Copy Number<br>Gains   | Non-Terminal<br>Events | GM09367: 46,XX,dup(6)(q21q24)                                                             | Duplication            | Yes                 | Yes                | Yes             |
| Copy Neutral<br>Events | Translocations         | GM06226*: 46,XY,der(1)t(1;16)(q44;p12)mat                                                 | Derivative chromosome  | No†                 | Yes                | Yes             |
| .                      | .                      | GM21699*: 46,XY,der(6)t(3;6)(p26;q26)                                                     | Derivative chromosome  | No†                 | Yes                | Yes             |
| .                      | .                      | GM14485*:<br>46,XY,der(8)del(8)(p23.3)dup(8)(:p23.1-<br>>p11.2::p23.1->qter)              | Derivative chromosome  | No†                 | Yes                | Yes             |
| .                      | .                      | GM22765: 46,XY,t(4;14;11)(q34.1;q21;q22.2)                                                | Balanced translocation | No†                 | Yes                | Yes             |
| .                      | .                      | GM10207:<br>46,XY,t(10;14)(10qter>10p13::14q24.3><br>14qter;14pter>14q24.3::10p13>10pter) | Balanced translocation | No†                 | Yes                | Yes             |
| .                      | .                      | GM18825: 46,XX,t(5;10)(p13.3;q21.1)                                                       | Balanced translocation | No†                 | Yes                | Yes             |
| .                      | .                      | GM22709§: 46,XY,t(16;20)(q11.2;q13.2)                                                     | Balanced translocation | No†                 | No                 | No              |
| Copy Neutral<br>Events | Inversions             | GM21075: 46,XY,inv(9)(q22.3q34.1)                                                         | Inversion              | No†                 | Yes                | Yes             |

54 Table 8: Long Ranger SV analysis of 23 Coriell samples with multiply-confirmed balanced or  
55 unbalanced SVs. \*Sample contains multiple structural variants. †Algorithm not expected to detect  
56 this variant type. ‡Deletion in GM10925 falls in a segmental duplication; was called with  
57 high-quality score by Long Ranger but filtered as a likely false positive. §Balanced translocation in  
58 GM22709 falls within a heterochromatic region on chromosome 16 where there are known gaps in  
59 the reference assembly.

Table 9: Intermediate SV calls with other call sets

| Intermediate SV metrics                                  | NA12878       |
|----------------------------------------------------------|---------------|
| Number of deletion calls from GATK                       | 1,824         |
| Number of deletion calls from LongRanger                 | 4,118         |
| Number of merged calls                                   | 5,136         |
| Average deletion size                                    | 696bp         |
| Number of heterozygous calls                             | 3,015         |
| Number of homozygous calls                               | 2,038         |
| Number of svclassify merged calls                        | 5,390         |
| Number of calls that match Svclassify truth set (Recall) | 2,024 (88.2%) |
| Number of false positive calls (Precision)               | 3,109 (39.4%) |
| Number of false negative calls                           | 257           |
| Comparison to Lumpy                                      | NA12878       |
| Number of deletion calls                                 | 19,307        |
| Number of svclassify merged calls                        | 10,588        |
| Average deletion size                                    | 767bp         |
| Number of calls that match Svclassify truth set (Recall) | 1,263 (55.4%) |
| Number of false positive calls (Precision)               | 8,307 (13.2%) |
| Number of false negative calls                           | 1018          |

60 Table 9: Extended intermediate SV (50 bp to 30 kb) results. Long Ranger produces SV calls in the 50  
61 bp to 30 kb range using barcode-related algorithms described above. Additionally, small indels are  
62 called using the Genome Analysis Toolkit (GATK). These two approaches work synergistically,  
63 with GATK's ability to call indels falling off as a function of read length (in this case, 2X150 bp). To  
64 evaluate this, we used SURVIVOR (Jeffares et al. 2017) to merge deletions  $\geq 50$  bp called by GATK  
65 with the intermediate SVs called by Long Ranger. This merged variant set was then merged again  
66 with SURVIVOR with the svclassify truth set (Parikh et al. 2016) in order to report the resulting  
67 true positive and false positive rates as well as the associated recall and precision. This is the same  
68 as Table 4 in the main text, but with the input being the merged results of Long Ranger deletions



69 and GATK instead of just Long Ranger. We saw that the addition of GATK added only 7 new true  
70 positive hits, reflecting the lack of small variants in the svclassify truth set.

71 To establish a comparison to existing methods, we also ran the Long Ranger alignments through  
72 the lumpyexpress (Layer et al., 2014) structural variant calling tool using standard parameters. We  
73 found that lumpyexpress called more than three times as many variants, with lower true positive  
74 and much higher false positive rates.

## <sup>75</sup> **Supplemental Files**

<sup>76</sup> Supplemental File 1: Per variant report of PacBio evidence for putative false positive calls.
