# Supplementary material for: Resolving the full spectrum of human genome variation using Linked-Reads
Source: Genome Res. 2019 Apr;29(4):635–45. doi: 10.1101/gr.234443.118 (PMC6442396; doi:10.1101/gr.234443.118)
Supplement: Supplemental Material [file supp_gr.234443.118_Supplemental_File_S1.xlsx]

## Sheet: hg19_FP_validation
type	PacBio_validated	chrom	pos	REF	ALT	TRUTH_GT	CrG_GT	PacBio_ALT	PacBio_COV	TruSeq_ALT	TruSeq_COV	Hap1_ALT	Hap1_COV	Hap2_ALT	Hap2_COV	Unphased_ALT	Unphased_COV
indels	Yes	chr10	100116276	CT	C	.	2018-01-01	39	46	23	26	8	12	13	16	5	6
indels	Yes	chr10	100271312	G	GGTGTGT	.	2018-01-01	44	45	23	23	5	6	3	3	15	16
indels	Yes	chr10	100538021	C	CAGAGAGAGAGAGAG	.	0/1	43	43	6	6	8	8	1	1	4	4
indels	Yes	chr10	100639609	C	CGT	2018-01-01	0/1	48	53	21	22	13	13	4	8	1	3
indels	Yes	chr10	100647892	A	AAC	.	0/1	36	50	14	26	7	7	0	6	3	4
indels	Yes	chr10	100720483	ATTTT	A	.	0/1	33	41	13	36	8	9	8	12	1	10
indels	Yes	chr10	100923984	TTATATATATATATA	T	.	2018-01-01	9	35	4	9	0	2	6	6	0	0
indels	No	chr10	10105652	AAC	A	.	0/1	4	40	3	17	8	13	0	12	0	0
indels	Yes	chr10	101080456	T	TACAC	.	2018-01-01	23	48	10	16	10	10	1	6	2	2
indels	Yes	chr10	10119091	T	TTATA	.	2018-01-01	42	43	17	17	2	2	10	11	2	2
indels	Yes	chr10	101231268	AGAAGGAAGGAAG	A	.	0/1	25	43	6	17	0	3	1	2	4	7
indels	Yes	chr10	101344915	T	TTGTGTGTG	.	2018-01-01	36	37	20	20	7	7	12	12	2	2
indels	Yes	chr10	101399479	T	TACACACAC	.	0/1	40	51	18	24	15	17	1	8	2	5
indels	Yes	chr10	101427686	C	CT	.	2018-01-01	20	38	19	19	6	7	7	9	6	6
indels	Yes	chr10	101430777	A	AAAT	0/1	2018-01-01	14	22	10	27	5	5	0	2	2	3
indels	Yes	chr10	101460151	GTGTGTGTGTGTGTGTGTGTA	G	1|0	2018-01-01	30	38	22	22	10	10	8	8	5	5
indels	Yes	chr10	101460155	GTGTGTGTGTGTGTGTA	G	0|1	2018-01-01	36	38	22	22	10	10	8	8	5	5
indels	Yes	chr10	101794993	AAATAAT	A	.	2018-01-01	11	13	17	17	5	5	2	2	1	1
indels	Yes	chr10	102150503	T	TTATA	.	2018-01-01	28	32	20	20	0	0	0	0	7	7
indels	Yes	chr10	102285474	CGTGTGT	C	.	0/1	18	36	8	8	2	2	3	3	12	17
indels	No	chr10	102323090	CTGTGTG	C	.	0/1	3	26	6	19	4	4	0	4	2	6
indels	No	chr10	102430061	CT	C	.	0/1	3	26	0	29	2	13	5	13	2	20
indels	No	chr10	102430068	T	TA	.	0/1	1	26	0	29	2	12	4	12	1	19
indels	No	chr10	102623687	GACAC	G	.	0/1	3	23	15	27	0	11	6	8	1	3
indels	No	chr10	102653645	TACAC	T	.	0/1	2	41	1	19	5	10	0	6	0	2
indels	Yes	chr10	102875275	CATT	C	.	0/1	10	14	20	22	11	11	3	5	2	2
indels	Yes	chr10	102875278	T	TATC	1|0	2018-01-01	28	29	18	21	5	5	13	14	2	2
indels	Yes	chr10	102897800	TCG	T	1|0	2018-01-01	20	25	16	26	15	16	5	9	6	9
indels	No	chr10	103021263	T	TG	.	0/1	2	32	2	27	6	19	3	13	1	6
indels	Yes	chr10	10308215	TTGGTGTTCATGTCGCTGGTGTTCATGACGCTGGTGTTCATGTCCCTGGTGTTCGTGACGCTGGTGTTCATGTCGC	T	.	2018-01-01	23	25	5	5	2	2	2	2	3	3
indels	Yes	chr10	103235679	C	CATAT	.	2018-01-01	22	24	22	22	5	6	11	12	1	1
indels	Yes	chr10	103441475	A	AAAT	.	2018-01-01	39	41	24	24	3	3	7	7	7	7
indels	Yes	chr10	103469072	GTATATATATATATATATATATATA	G	2018-01-01	0/1	33	34	18	18	4	5	5	5	7	8
indels	Yes	chr10	103469074	ATATATATATATATATATATATA	A	.	0/1	35	36	18	18	4	5	5	5	6	6
indels	Yes	chr10	103536611	C	CCACA	.	0/1	19	29	8	20	1	6	10	10	4	7
indels	No	chr10	104064932	TTGTG	T	.	0/1	6	37	10	21	0	3	5	6	4	8
indels	Yes	chr10	104251689	AT	A	.	0/1	22	45	5	26	0	1	1	3	5	7
indels	Yes	chr10	10455900	C	CAT	.	2018-01-01	40	42	26	26	7	7	4	4	19	19
indels	Yes	chr10	104588921	A	AAC	.	2018-01-01	19	20	18	18	11	14	11	11	2	2
indels	Yes	chr10	104675802	AATATAT	A	.	2018-01-01	10	36	5	13	0	2	3	3	1	2
indels	Yes	chr10	104704338	C	CGT	.	2018-01-01	37	38	24	24	10	13	16	16	3	3
indels	Yes	chr10	104722447	CTG	C	.	2018-01-01	12	33	17	21	7	7	6	6	5	5
indels	Yes	chr10	104791594	GC	G	0/1	2018-01-01	24	42	8	21	0	12	14	14	0	2
indels	Yes	chr10	104943019	G	GATAT	.	2018-01-01	29	31	15	15	5	5	5	5	1	2
indels	No	chr10	104995191	T	TC	.	0/1	0	33	0	28	5	19	3	12	0	2
indels	Yes	chr10	105043505	C	CT	0/1	2018-01-01	11	34	16	23	3	6	13	13	2	4
indels	No	chr10	105536194	CTG	C	.	0/1	1	27	1	19	0	2	2	2	1	15
indels	No	chr10	105767526	CAAAT	C	.	0/1	2	39	0	18	0	2	0	0	2	6
indels	Yes	chr10	10619327	T	TTTATTATTATTATTA	.	2018-01-01	40	41	24	24	8	9	14	14	2	2
indels	Yes	chr10	106218352	GTATATATATATA	G	.	0/1	27	43	3	11	0	7	11	11	2	6
indels	Yes	chr10	106294512	C	CTTTCTT	.	2018-01-01	15	21	14	19	0	0	5	8	3	7
indels	Yes	chr10	106527358	CTCCCCCT	C	0/1	2018-01-01	21	35	6	13	0	2	7	8	0	0
indels	Yes	chr10	106785595	A	AACACAC	.	2018-01-01	34	35	24	24	5	5	5	6	19	20
indels	No	chr10	106929207	ATGT	A	.	0/1	0	39	0	23	5	7	0	23	3	16
indels	No	chr10	106929231	G	GACA	.	0/1	1	40	0	24	5	5	0	26	4	19
indels	No	chr10	10700142	C	CA	.	0/1	8	47	0	47	5	10	0	14	1	2
indels	No	chr10	107091746	TTG	T	.	0/1	1	28	0	24	3	10	0	11	1	11
indels	Yes	chr10	107230660	T	TACACACAC	.	0/1	24	35	13	18	10	10	0	8	0	0
indels	Yes	chr10	107325713	TTCTCTCTCTCTCTCTCTC	T	.	0/1	10	38	11	19	3	3	0	8	1	4
indels	Yes	chr10	107429567	CCACACACA	C	.	0/1	10	30	8	19	12	12	1	6	0	0
indels	Yes	chr10	107520896	TTGTGTG	T	.	0/1	11	31	7	14	8	8	0	6	0	1
indels	Yes	chr10	107536124	GTTGT	G	.	0/1	21	25	0	0	0	3	5	5	0	0
indels	No	chr10	107554065	AGTGT	A	.	0/1	6	35	8	15	10	10	0	9	2	14
indels	Yes	chr10	107601516	CATATATATAT	C	.	0/1	15	26	6	15	10	11	0	6	0	1
indels	Yes	chr10	107602240	T	TTGTGTGTG	.	0/1	26	32	7	12	13	13	2	7	3	4
indels	Yes	chr10	107619844	CATATATATATATAT	C	.	0/1	12	36	8	13	6	6	0	3	0	0
indels	Yes	chr10	107816823	TTTTC	T	.	0/1	11	38	7	16	5	7	0	6	0	0
indels	Yes	chr10	107898117	T	TCA	0/1	2018-01-01	45	45	29	29	8	8	9	9	8	9
indels	Yes	chr10	107915497	A	AGTGTGTGTGTGTGT	.	2018-01-01	39	39	23	23	7	7	5	5	10	10
indels	Yes	chr10	107948759	A	AAC	.	2018-01-01	39	39	22	23	12	12	3	3	3	3
indels	No	chr10	107988325	AAC	A	.	0/1	2	30	0	12	5	12	1	12	3	9
indels	Yes	chr10	108102142	T	TTGTGTGTGTGTGTGTGTGTGTGTGTGTGTG	2018-01-01	0/1	39	39	18	18	13	13	8	8	12	12
indels	Yes	chr10	108102167	T	TGTGTGTGTGTGTGTGTGTGTGTGTG	.	0/1	36	38	11	15	5	6	3	9	7	11
indels	Yes	chr10	108216109	CATATATAT	C	.	0/1	14	43	3	5	0	5	8	8	2	2
indels	Yes	chr10	108274164	CTGTGTG	C	.	2018-01-01	12	31	12	13	0	2	7	7	4	4
indels	No	chr10	108654028	CGTGTGT	C	.	0/1	9	42	0	13	0	10	3	5	1	7
indels	Yes	chr10	108684219	T	TTATCTATC	0/1	2018-01-01	31	46	7	15	4	4	2	3	7	8
indels	No	chr10	108798158	T	TG	.	2018-01-01	6	39	3	13	7	9	7	10	1	1
indels	Yes	chr10	108884711	CT	C	.	0/1	32	49	3	16	3	7	0	6	1	3
indels	Yes	chr10	109000513	C	CCACACACACACA	.	0/1	32	45	7	20	11	11	0	6	1	2
indels	Yes	chr10	109058799	CTGTGTGTG	C	.	0/1	11	38	6	11	6	6	1	7	2	2
indels	Yes	chr10	109088102	TATTC	T	.	0/1	17	42	15	23	7	7	0	18	3	3
indels	Yes	chr10	109088106	C	CATTC	.	0/1	23	42	8	23	0	7	17	18	0	2
indels	Yes	chr10	109243860	CTATATATATATATATATATATATATA	C	.	0/1	20	40	6	16	7	7	1	6	1	3
indels	Yes	chr10	109353802	A	AAGAGAGAG	.	2018-01-01	18	18	22	22	14	14	10	11	2	3
indels	Yes	chr10	109393741	CTTTTTTTTTT	C	.	2018-01-01	37	39	17	17	10	10	16	16	2	3
indels	No	chr10	109626145	AACACACAC	A	.	0/1	8	42	11	18	0	13	5	5	2	4
indels	Yes	chr10	109686853	A	AAT	.	2018-01-01	27	27	23	24	7	7	6	11	5	5
indels	No	chr10	109702103	TAC	T	.	0/1	7	47	0	12	2	3	1	5	0	2
indels	No	chr10	109758009	CTG	C	.	0/1	3	36	7	21	0	4	4	6	2	3
indels	Yes	chr10	110076068	A	AT	.	2018-01-01	23	38	14	14	2	2	6	6	2	2
indels	Yes	chr10	110076077	AATATATTATGTAATTATATATT	A	.	2018-01-01	30	39	13	14	3	3	7	7	2	2
indels	No	chr10	110081112	TTG	T	.	0/1	4	48	7	29	8	9	1	10	3	8
indels	Yes	chr10	110083495	A	ATCTGTCTG	.	2018-01-01	43	45	17	17	17	17	12	13	4	4
indels	No	chr10	110249448	C	CACTGTGTTAGGTCTGTCCCCTTCCAGACGGACAGACCTAACACAGTGACCAGTTGCTTATT	.	0/1	1	49	0	24	1	3	2	17	4	19
indels	No	chr10	110354204	GAC	G	.	0/1	4	50	3	14	1	14	4	7	1	4
indels	Yes	chr10	110381431	C	CTG	.	2018-01-01	46	48	29	29	11	11	14	14	6	6
indels	Yes	chr10	110405974	TA	T	0/1	2018-01-01	29	38	37	37	15	16	9	9	3	3
indels	Yes	chr10	11043743	CT	C	.	0/1	16	33	13	30	2	18	3	3	5	11
indels	Yes	chr10	110639944	A	AAAT	0/1	2018-01-01	19	27	14	25	5	5	1	3	0	0
indels	Yes	chr10	11067200	G	GTATATATATATA	.	2018-01-01	39	40	15	17	8	8	10	10	5	6
indels	No	chr10	110701365	AATAT	A	.	0/1	6	48	0	17	1	8	2	5	0	3
indels	No	chr10	111147012	A	AT	.	0/1	3	26	0	29	1	7	7	9	7	10
indels	Yes	chr10	111482810	C	CATATATATATATATATATATATATATATATAT	.	2018-01-01	35	35	13	13	4	4	3	3	1	2
indels	Yes	chr10	111555279	CTTTA	C	.	0/1	18	42	15	34	13	13	0	9	0	0
indels	Yes	chr10	111823495	TTATATATATATATATA	T	.	2018-01-01	21	46	7	15	7	7	0	2	0	1
indels	Yes	chr10	112052042	A	AT	0/1	2018-01-01	17	55	19	38	1	4	14	14	7	7
indels	Yes	chr10	112223378	GCACACACACACA	G	.	0/1	11	34	10	24	0	5	6	6	2	2
indels	No	chr10	112262731	GT	G	.	0/1	7	38	1	26	0	0	0	9	4	9
indels	Yes	chr10	112879274	GCTCTCTCTCT	G	.	0/1	12	39	8	16	8	8	0	7	0	5
indels	Yes	chr10	112879280	TCTCT	T	.	0/1	14	38	9	18	8	8	3	6	1	5
indels	No	chr10	113396396	GGTGTGTGT	G	.	0/1	3	32	1	8	0	3	2	5	1	14
indels	No	chr10	113538005	AACACAC	A	.	0/1	0	33	0	9	7	7	1	5	2	5
indels	No	chr10	113676781	GAT	G	.	2018-01-01	3	47	5	11	1	4	2	2	3	4
indels	Yes	chr10	113726310	GAGAAAGAA	G	.	2018-01-01	17	31	6	12	3	3	1	2	3	4
indels	No	chr10	113883205	GAC	G	.	0/1	1	32	0	18	1	3	1	11	4	11
indels	Yes	chr10	113945329	GACACACACACACACACAC	G	.	0/1	13	41	3	12	0	6	11	11	0	7
indels	No	chr10	113958847	ATG	A	.	0/1	6	29	4	19	0	3	11	12	3	7
indels	Yes	chr10	11395937	AGTGTGTGTGTGT	A	.	0/1	8	30	11	16	6	6	0	11	2	4
indels	Yes	chr10	113959925	AATATATATATATATAT	A	.	2018-01-01	19	42	10	17	0	4	6	6	1	2
indels	Yes	chr10	114290822	T	TCA	.	2018-01-01	28	29	19	19	6	6	10	10	11	11
indels	Yes	chr10	114297070	G	GTATATATATATATA	.	2018-01-01	37	39	14	14	9	9	4	4	0	0
indels	Yes	chr10	114351297	A	ACACACAC	.	0/1	42	44	20	23	8	10	4	4	11	12
indels	Yes	chr10	114472233	T	TCACA	.	2018-01-01	27	29	17	18	3	4	7	7	4	6
indels	No	chr10	114521529	CTG	C	.	0/1	3	45	8	18	0	8	6	7	2	7
indels	No	chr10	114750408	TGA	T	.	0/1	1	43	0	30	2	13	2	4	0	5
indels	Yes	chr10	114823652	C	CGT	.	2018-01-01	50	52	29	29	5	8	10	10	4	4
indels	No	chr10	114970624	AG	A	.	0/1	5	46	0	16	1	1	1	3	0	9
indels	Yes	chr10	115034556	T	TCACACA	.	2018-01-01	35	35	32	32	5	5	6	6	9	9
indels	No	chr10	11504740	G	GTAATCCACCAGTGGATTACTTGCCAGA	.	0/1	0	55	0	26	3	9	0	7	0	2
indels	Yes	chr10	115148588	CT	C	.	0/1	14	30	2	21	7	16	1	8	1	4
indels	Yes	chr10	115274501	CAACA	C	1|0	2018-01-01	41	46	14	14	11	12	4	4	4	4
indels	Yes	chr10	115274504	CA	C	0|1	2018-01-01	43	47	14	14	12	12	4	4	4	4
indels	Yes	chr10	115634201	TTGTGTGTGTG	T	.	0/1	23	48	8	18	7	7	4	7	2	4
indels	Yes	chr10	116041776	C	CTTTTTTTTTTTT	.	2018-01-01	37	37	27	27	3	3	9	9	10	10
indels	Yes	chr10	116071993	AGTGTGTGTGTGTGTGT	A	.	0/1	34	38	21	23	5	7	2	3	6	6
indels	Yes	chr10	116071995	TGTGTGTGTGTGTGT	T	.	0/1	34	38	24	24	5	6	3	3	4	4
indels	Yes	chr10	116128526	AACAC	A	.	0/1	17	48	12	25	7	9	2	7	0	0
indels	Yes	chr10	116325547	C	CTTTTT	.	2018-01-01	23	35	23	23	2	2	3	4	17	17
indels	Yes	chr10	116398381	TACACACAC	T	.	2018-01-01	26	39	16	17	3	3	5	5	7	7
indels	Yes	chr10	116409159	AAAAT	A	.	2018-01-01	41	50	9	9	2	2	3	3	3	3
indels	No	chr10	116476169	AAC	A	.	2018-01-01	2	44	0	17	3	11	2	12	0	2
indels	Yes	chr10	116558315	A	AC	.	2018-01-01	30	47	18	18	10	10	7	7	3	5
indels	Yes	chr10	116640439	A	AACACAC	.	2018-01-01	31	32	21	21	8	9	15	15	5	6
indels	No	chr10	116651296	ATG	A	.	0/1	3	45	12	24	6	8	0	10	1	2
indels	No	chr10	116679508	CTG	C	.	0/1	3	35	1	17	2	6	0	10	1	4
indels	Yes	chr10	116973793	T	TACACACAC	.	0/1	24	43	15	23	0	12	5	5	4	5
indels	Yes	chr10	117390337	T	TACAC	.	2018-01-01	31	34	14	15	2	4	8	9	2	2
indels	Yes	chr10	117500348	CACACACACACACACACAA	C	1|0	2018-01-01	37	43	20	20	5	5	13	15	4	5
indels	Yes	chr10	117596977	CCACACACACACA	C	.	0/1	19	41	7	17	9	10	0	8	1	1
indels	Yes	chr10	117851607	T	TACACAC	.	2018-01-01	38	39	12	12	7	7	9	9	1	1
indels	Yes	chr10	117907567	A	ATGTGTGCATGCG	.	2018-01-01	23	24	26	27	13	13	10	10	1	1
indels	Yes	chr10	117965108	GATATATATATAT	G	.	0/1	19	37	8	16	0	4	3	3	0	0
indels	Yes	chr10	117965438	T	TCACA	.	0/1	18	32	11	17	13	15	0	5	2	3
indels	Yes	chr10	117972035	A	AAC	.	2018-01-01	28	47	5	11	6	6	1	12	0	0
indels	Yes	chr10	11830153	CA	C	1|0	2018-01-01	39	44	31	31	10	10	11	11	2	2
indels	Yes	chr10	118485536	A	ACGCG	.	2018-01-01	34	35	18	18	13	13	15	15	15	15
indels	Yes	chr10	118572758	A	ATTTTTTTTT	.	2018-01-01	26	27	20	20	4	4	5	5	2	2
indels	Yes	chr10	118811510	C	CATATATATATATATATATAT	.	2018-01-01	46	47	14	14	1	1	2	2	8	9
indels	Yes	chr10	11889155	T	TAA	0/1	2018-01-01	35	42	25	27	5	12	7	7	4	4
indels	Yes	chr10	118941887	CATATATAT	C	.	0/1	10	37	9	19	8	8	0	6	1	3
indels	Yes	chr10	119064982	T	TACAC	.	2018-01-01	20	36	6	14	15	15	0	11	3	3
indels	Yes	chr10	119130429	T	TTGTGTGTGTGTGTGTGTG	.	0/1	32	43	11	20	6	7	0	10	1	3
indels	Yes	chr10	119286170	G	GTGTATATA	.	2018-01-01	52	52	27	27	6	6	3	3	18	18
indels	Yes	chr10	119444957	T	TACACACACACAC	.	2018-01-01	38	40	26	26	12	12	8	8	6	6
indels	No	chr10	119449894	T	TGGAGCAATGACAGCCTCAGAGTCCCAATTTGCAAAGGGCTCTCAGAAGTCTGTCTTTGCTCCACTGTGATCAATTTGTGCATTGATCACAGA	.	0/1	0	39	0	21	2	7	2	14	0	3
indels	Yes	chr10	119492975	TA	T	.	0/1	15	34	1	25	4	4	2	5	1	1
indels	Yes	chr10	119578654	G	GACACACACACACACAC	.	2018-01-01	55	56	28	28	18	18	12	13	5	5
indels	Yes	chr10	119748272	C	CTGTGTGTGTGTG	.	2018-01-01	49	50	16	16	6	6	13	14	3	3
indels	Yes	chr10	119966165	GTGTA	G	.	0/1	19	59	2	17	4	7	1	10	5	9
indels	No	chr10	120036175	AGT	A	.	0/1	5	35	14	25	0	8	11	13	1	3
indels	Yes	chr10	120221496	T	TAAAAAAA	.	2018-01-01	58	62	21	21	7	7	16	16	5	5
indels	No	chr10	120285701	CCT	C	.	0/1	4	36	1	26	2	5	0	7	3	20
indels	Yes	chr10	120520430	G	GC	.	2018-01-01	41	43	22	23	8	9	2	5	18	21
indels	No	chr10	120780136	GAC	G	.	0/1	0	34	1	21	1	2	2	9	4	12
indels	Yes	chr10	120788134	AGAAG	A	.	2018-01-01	27	30	20	21	1	1	3	3	5	8
indels	Yes	chr10	12096772	TA	T	.	0/1	12	27	8	23	3	3	0	8	0	2
indels	Yes	chr10	121236314	TTTTCTTTC	T	.	2018-01-01	20	32	10	12	1	1	2	3	2	3
indels	Yes	chr10	121281139	A	AAAGGAAGGAAGG	0|1	2018-01-01	18	23	14	16	1	2	5	5	3	6
indels	No	chr10	121350274	GAGAA	G	.	0/1	5	22	6	16	0	4	1	1	1	1
indels	Yes	chr10	121406510	C	CAAAAAAAAAAAA	CAAAAAAAAAAAAAA	.	2018-02-01	18	28	12	17	3	9	7	chr10	0	2
indels	Yes	chr10	121452612	CTGTGTGTGTGTGTGTGTG	C	.	2018-01-01	28	31	18	20	5	5	5	5	1	1
indels	No	chr10	12145490	CTGTG	C	.	0/1	11	46	14	26	6	6	0	11	0	0
indels	Yes	chr10	121525253	CTG	C	.	2018-01-01	12	36	17	20	7	7	8	8	2	2
indels	Yes	chr10	121545047	CGAGAGAGA	C	.	2018-01-01	16	41	6	13	10	10	0	3	4	6
indels	Yes	chr10	12173893	AC	A	.	2018-01-01	39	43	4	4	2	2	2	2	0	0
indels	No	chr10	121751789	TAC	T	.	0/1	7	44	5	25	0	10	9	10	2	4
indels	Yes	chr10	121999686	GCT	G	.	2018-01-01	28	43	14	14	2	2	5	5	3	3
indels	Yes	chr10	122503405	AACACAC	A	.	0/1	8	30	13	14	0	5	10	11	1	5
indels	Yes	chr10	122557544	ACC	A	.	2018-01-01	34	35	16	17	9	9	8	8	9	10
indels	No	chr10	122605344	GTCCTTCACCCTTAGCGGCAAGTCCCGCTTTCCTGGGGCAGGGGCAAGTACCCCTCAACCCCTTC	G	.	0/1	5	25	1	12	0	11	4	4	0	3
indels	Yes	chr10	122725636	C	CTGTGTG	.	2018-01-01	22	39	7	13	1	7	8	8	2	2
indels	No	chr10	122793571	A	AG	.	0/1	0	36	0	25	3	10	3	8	1	5
indels	No	chr10	122793574	AC	A	.	0/1	2	36	0	25	3	10	3	8	1	5
indels	Yes	chr10	122923071	T	TACACAC	.	2018-01-01	24	25	27	27	13	13	10	10	3	3
indels	Yes	chr10	122933606	AC	A	1|0	2018-01-01	16	26	14	21	5	11	12	12	2	4
indels	Yes	chr10	122933607	C	CACACA	0|1	2018-01-01	21	26	10	21	10	11	7	12	3	4
indels	No	chr10	123139493	TACAC	T	.	0/1	5	21	8	17	5	5	0	6	0	2
indels	Yes	chr10	123151717	CT	C	2018-01-01	0/1	27	34	25	27	3	7	5	7	2	2
indels	Yes	chr10	123162915	G	GTATATATA	.	2018-01-01	44	45	30	30	5	5	1	1	6	7
indels	Yes	chr10	123350503	G	GCA	.	0/1	18	33	16	23	2	12	9	9	1	3
indels	No	chr10	123375265	G	GCC	.	0/1	7	29	11	24	16	17	4	18	0	1
indels	No	chr10	123428196	A	ATCTT	.	0/1	0	42	0	15	0	12	6	20	0	0
indels	Yes	chr10	123489758	AGTGT	A	.	0/1	10	34	8	18	8	9	0	7	2	6
indels	Yes	chr10	12349325	GTA	G	.	0/1	15	45	12	17	0	19	14	14	2	3
indels	Yes	chr10	123529748	A	AACACAC	.	2018-01-01	24	27	14	15	4	6	13	14	2	2
indels	Yes	chr10	12370719	CA	C	.	2018-01-01	24	37	12	23	1	23	17	18	6	8
indels	No	chr10	123807370	C	CATTTT	.	0/1	1	36	0	18	2	10	3	16	0	4
indels	Yes	chr10	123885831	C	CTGTGTGTGTGTGTGTG	.	2018-01-01	21	21	16	16	16	17	8	8	5	5
indels	Yes	chr10	124237908	A	ATT	.	2018-01-01	20	34	14	14	4	4	1	1	1	2
indels	No	chr10	124539019	ATG	A	.	0/1	5	25	8	16	8	9	0	13	0	2
indels	No evidence	chr10	124686405	C	CAGAA	.	2018-01-01	4	7	6	10	1	1	0	2	2	4
indels	Yes	chr10	124992625	CTCCCTTCCCTTCCCTTCCCT	C	0/1	2018-01-01	6	12	6	10	4	4	5	7	1	1
indels	Yes	chr10	125157338	CGTGTGTGTGTGTGTGTGT	C	.	0/1	23	59	7	30	0	16	9	9	2	3
indels	Yes	chr10	125205583	CGTGTGTGTGT	C	.	2018-01-01	22	24	24	25	3	3	8	8	2	2
indels	No	chr10	12521939	G	GC	.	0/1	5	37	0	36	4	10	1	18	0	2
indels	Yes	chr10	125406655	AAAGGAAGGAAGGAAGGAAGG	A	.	0/1	20	29	5	16	9	9	0	4	0	2
indels	Yes	chr10	125409113	G	GGTGTGT	.	2018-01-01	44	45	23	23	6	6	10	10	2	2
indels	No	chr10	125413212	GAAGGA	G	.	2018-01-01	1	19	5	10	3	4	0	4	0	0
indels	Yes	chr10	125660945	T	TTGTG	.	0/1	41	46	12	19	3	3	7	11	1	3
indels	Yes	chr10	125667206	CCCT	C	1|0	2018-01-01	22	30	12	13	1	7	14	14	3	5
indels	Yes	chr10	125667207	CCT	C	0|1	2018-01-01	28	37	25	28	10	15	17	18	3	5
indels	Yes	chr10	126101836	T	TACACAC	.	0/1	37	46	9	16	1	9	9	9	2	4
indels	No	chr10	12611553	C	CAAA	.	0/1	1	17	4	11	0	11	3	5	1	1
indels	No	chr10	126173239	CAG	C	0/1	2018-01-01	2	33	11	23	2	4	11	12	1	3
indels	Yes	chr10	126217595	CT	C	.	2018-01-01	28	31	12	13	11	13	13	14	2	3
indels	Yes	chr10	126294846	C	CGG	.	2018-01-01	31	42	30	31	12	12	10	11	5	5
indels	Yes	chr10	126565137	CAAATAAATAAAT	C	.	0/1	12	25	3	12	0	8	11	11	0	0
indels	No	chr10	126749032	CGT	C	0/1	2018-01-01	4	41	13	27	12	13	4	8	1	1
indels	No evidence	chr10	127093616	AGGTGACATGATGCAACATCAT	A	.	0/1	1	5	4	11	14	14	0	19	1	1
indels	Yes	chr10	127381342	G	GACACACACAC	.	0/1	13	35	14	26	7	7	0	3	3	7
indels	Yes	chr10	127601012	AGTGTGTGTGTGTGTGTGTGT	A	.	0/1	21	39	5	14	12	13	0	7	1	4
indels	Yes	chr10	127641369	TACACACACAC	T	.	2018-01-01	18	27	9	10	6	7	6	6	0	0
indels	Yes	chr10	127661462	A	AACAC	.	2018-01-01	38	42	21	22	6	9	8	8	2	2
indels	Yes	chr10	127679819	G	GGTGT	.	2018-01-01	35	36	19	20	8	8	13	14	5	5
indels	No	chr10	127891068	TTC	T	.	0/1	1	27	0	19	0	5	1	4	3	14
indels	Yes	chr10	128086718	T	TG	.	0/1	10	33	2	32	3	6	1	12	1	1
indels	Yes	chr10	128104006	TTGTGTG	T	.	2018-01-01	27	40	14	16	2	2	7	7	1	1
indels	Yes	chr10	128178627	T	TATAATATATAATATATAATATAATA	0/1	2018-01-01	19	42	13	20	6	6	0	1	0	0
indels	Yes	chr10	128614293	CTG	C	.	2018-01-01	13	33	14	17	4	7	5	5	8	9
indels	Yes	chr10	128864119	GA	G	2018-01-01	0/1	35	44	27	27	0	1	10	10	15	16
indels	Yes	chr10	128919719	A	ATGTGTGTGTGTGTGTGTG	.	2018-01-01	44	44	35	35	3	3	3	3	25	26
indels	No	chr10	128948452	T	TTC	.	0/1	4	41	0	23	0	4	1	13	5	24
indels	Yes	chr10	129047694	TATACAC	T	0/1	2018-01-01	11	29	19	19	5	6	8	8	4	6
indels	Yes	chr10	129047696	TACACAC	T	0/1	2018-01-01	11	31	17	18	7	7	6	7	4	6
indels	Yes	chr10	129148570	A	AC	0/1	2018-01-01	19	29	18	18	10	10	9	9	0	0
indels	Yes	chr10	129148574	C	CCT	0/1	2018-01-01	25	30	19	19	10	10	9	9	0	0
indels	No	chr10	129195236	C	CTA	.	0/1	6	26	4	12	5	5	1	9	0	1
indels	Yes	chr10	12920254	ATGTG	A	.	0/1	13	34	10	16	0	12	5	8	3	3
indels	Yes	chr10	129326728	A	AGT	.	2018-01-01	38	39	18	18	12	12	6	6	1	1
indels	Yes	chr10	129443169	G	GTATATATATATATATATA	.	2018-01-01	48	49	14	14	2	2	7	7	4	4
indels	Yes	chr10	129634516	G	GAC	.	0/1	31	46	13	21	7	8	0	9	0	0
indels	Yes	chr10	129669219	ATCTCTCTCTCTC	A	.	0/1	18	35	8	13	8	10	1	14	3	4
indels	Yes	chr10	129669227	CTCTC	C	.	0/1	25	36	14	15	6	7	15	15	4	4
indels	Yes	chr10	129927789	CTA	C	.	0/1	17	50	14	20	3	4	2	7	1	1
indels	Yes	chr10	130068048	GT	G	.	2018-01-01	24	35	13	28	4	13	7	7	0	0
indels	Yes	chr10	130245598	CTTCT	C	1|0	2018-01-01	26	35	14	21	4	7	5	5	5	6
indels	Yes	chr10	13025128	GTGTATATATATATATATA	G	.	0/1	11	34	13	15	7	7	1	5	1	1
indels	Yes	chr10	130340171	A	AACACACACACAC	.	2018-01-01	27	28	25	25	2	5	12	12	4	4
indels	Yes	chr10	130435947	GAC	G	.	2018-01-01	11	39	16	16	11	11	12	12	3	5
indels	Yes	chr10	130695561	C	CAGAGAGAG	.	2018-01-01	40	40	19	19	10	10	12	12	12	12
indels	Yes	chr10	130721988	CATCT	C	.	2018-01-01	32	38	23	23	1	1	5	5	4	4
indels	Yes	chr10	130969277	T	TACAC	.	2018-01-01	57	57	22	22	8	8	5	5	6	6
indels	Yes	chr10	131092507	T	TGGAAGGAAGGAA	.	2018-01-01	37	38	22	22	5	5	5	5	1	1
indels	Yes	chr10	131219067	C	CAAAT	.	2018-01-01	21	43	6	9	3	3	0	0	4	6
indels	Yes	chr10	131286268	T	TAC	2018-01-01	0/1	30	30	18	18	2	4	6	6	33	36
indels	Yes	chr10	131915384	C	CATAAATAA	.	2018-01-01	38	42	16	16	4	4	8	8	1	2
indels	Yes	chr10	13209585	C	CGGG	.	2018-01-01	17	38	29	29	9	9	11	11	9	9
indels	No	chr10	132132133	GCACACACA	G	.	0/1	9	39	12	20	0	3	12	12	0	0
indels	Yes	chr10	132155307	GCA	G	.	2018-01-01	13	28	19	20	13	15	6	6	0	2
indels	No	chr10	132201002	A	ATTCCCCAGGTCTCTCAGGTCAAGGTGCCACGAATGACCACCATGACCAGAGAGGCCTGGGTGGCATGCCTTCCCCTGGGAGAGGAAAGCTCGGGCACC	.	0/1	0	41	0	17	1	10	3	11	0	2
indels	Yes	chr10	132257667	GGGGAGGGGTGTCATCCAAGGTGAAGAGCGAGAGGTGTTCCCCAAGGTGAAGAGGGAGACGTATTCTCCAAGATGAAGA	G	.	2018-01-01	14	15	12	13	3	3	5	5	0	0
indels	Yes	chr10	132454344	CGGACATGCAGGTGGGGGTG	C	.	2018-01-01	9	10	4	6	4	7	4	9	7	9
indels	No evidence	chr10	132454368	GGACGTGCAGGTGGGGGTGGGGCGGGCGTGCAGGTGGGGGTGGGGCGGACGTGCAGGTGGGGGTGGGGCGGGCGTGCAGGTGGGGGTGGGGCGGACGTGCAGGTGGGGGTGGGGCGGACA	G	.	2018-01-01	0	5	2	3	0	2	4	7	0	3
indels	No	chr10	132747952	GA	G	.	0/1	2	30	0	32	0	9	6	10	0	11
indels	Yes	chr10	132818979	CCACACCCCACATCCCTCCAGGGCT	C	.	0/1	15	26	1	6	1	4	7	7	1	1
indels	No evidence	chr10	132842372	GGATGCCTTCACTCCTGGGGAGCTCTGGAAGCCCTTACTCTTGGGGAGCACCAAAGCCCTCCTGGGGAGCACTA	G	.	2018-01-01	3	4	0	0	0	0	0	0	2	2
indels	Yes	chr10	133015971	CTTTTTT	C	.	2018-01-01	24	32	2	8	5	5	0	0	2	2
indels	Yes	chr10	133052565	A	AATAT	0/1	2018-01-01	27	39	14	22	4	4	0	1	1	2
indels	Yes	chr10	133083690	GAA	G	1|0	2018-01-01	18	24	7	11	14	15	12	17	2	3
indels	Yes	chr10	133083800	GA	G	1|0	2018-01-01	18	20	12	12	6	7	11	14	1	1
indels	Yes	chr10	133083801	A	AAAAG	0|1	2018-01-01	14	19	6	8	3	6	11	11	1	1
indels	Yes	chr10	133113936	GTA	G	1|0	2018-01-01	33	43	13	17	3	6	7	7	3	4
indels	No	chr10	133184488	CCAGAGGGAGGAGTGGAGAGAAGAGTTGAGGGAGGACCAGAGGGAGGAGCAAGGTAGGAGGTAGGGAGGAG	C	.	0/1	0	37	0	17	16	22	1	44	2	42
indels	No	chr10	133227059	GGA	G	.	0/1	1	39	0	14	0	3	0	0	6	14
indels	Yes	chr10	133340631	C	CCTCTCTCTCT	.	2018-01-01	36	37	21	21	6	6	13	13	1	2
indels	No	chr10	133439388	CCAA	C	.	0/1	0	24	0	20	5	21	1	14	0	2
indels	No	chr10	133459706	AC	A	.	0/1	1	22	1	15	1	4	1	7	0	1
indels	No	chr10	133459710	AGTTTG	A	.	0/1	0	22	0	14	1	4	1	7	0	1
indels	No	chr10	133459715	G	GAAAAA	.	0/1	0	22	0	14	1	4	2	7	0	1
indels	Yes	chr10	133502425	A	AGGATGGAT	.	0/1	12	25	6	15	11	12	36	75	24	40
indels	Yes	chr10	133524039	G	GC	0/1	2018-01-01	11	29	7	9	13	14	7	14	3	3
indels	Yes	chr10	133821805	T	TTA	.	2018-01-01	32	42	7	15	4	4	1	3	3	4
indels	Yes	chr10	133840036	GT	G	.	2018-01-01	11	28	15	29	8	8	2	7	2	2
indels	Yes	chr10	133840041	T	TG	.	0/1	13	28	19	31	0	9	8	8	0	2
indels	Yes	chr10	133840043	T	TTTTGTTTTTG	.	0/1	17	28	20	31	0	10	8	8	0	2
indels	No	chr10	133876029	CGAAGATG	C	.	0/1	0	35	2	21	0	9	1	6	2	10
indels	No	chr10	133954073	ACTTGGAGGAGGTAACGAGGGTCTCCTGCCGGGTCCTGGGCTTGGAGGAGGTAACGAGGGTCTCCTGCCGGGTCCTGGG	A	.	0/1	2	15	4	12	0	10	3	3	1	2
indels	Yes	chr10	133974422	T	TGG	.	0/1	11	16	7	8	19	26	0	0	1	3
indels	Yes	chr10	134094682	GACACACAC	G	.	0/1	10	22	16	24	0	5	11	11	1	4
indels	Yes	chr10	134210667	CCGGCGG	C	0/1	2018-01-01	9	20	13	24	0	2	3	4	0	2
indels	No evidence	chr10	134580754	GAGCTTGGGTGGGAGCCGGAGGATGCGGCTTCAGGGAGCTTGGGTGGGAGCTGGAGGATGCGGCCTCGGAGCTTGGGTGGGAGCTGGAGGATGTGTCCTC	G	.	2018-01-01	3	5	3	7	2	2	0	2	3	3
indels	Yes	chr10	134606067	ACAGCATCTACACTGGGTCCGGGAACCGTGTGGGGGTGCAGCGTCTACACTGGGTCCGGGAACCGTGTGGGTGCAGCGTCTACACTGGGTCCGGGAACCGTGTGCGTG	A	.	2018-01-01	14	14	8	8	4	5	3	3	3	3
indels	Yes	chr10	134636260	A	AGTGCTGATGTGTGCTGTGTGTGCACTTGTGTGTGCTGTGTGTGTGCTGATGTGTGCTGTGTGATGTGT	.	0/1	16	18	7	9	61	110	39	73	27	52
indels	Yes	chr10	134636686	C	CTGA	.	2018-01-01	27	32	23	23	274	307	207	220	147	157
indels	Yes	chr10	134637241	C	CTG	.	0/1	18	40	11	19	89	275	118	226	70	169
indels	Yes	chr10	134701188	CCTCT	C	.	0/1	13	40	8	16	35	51	17	82	14	26
indels	Yes	chr10	134748813	CGATCTTCTCATTCCCCTCAGCACCCAAACCCACTGT	C	.	0/1	6	19	3	13	10	10	0	16	1	2
indels	No	chr10	134879899	T	TG	.	0/1	3	21	0	1	77	303	195	231	140	323
indels	Yes	chr10	135016597	ACCCCCAAACGCACGGCGTCCAGCGGGGAGCACTCGGCCCCCAAACGCACGGCGTCCAGCGGGGAGCACTCGGCCCCCAAACGCACAGAGTCCAGCGGGGAGCACTCGG	A	.	0/1	16	23	9	20	7	7	2	5	1	1
indels	Yes	chr10	135035567	CTT	C	.	2018-01-01	22	25	28	28	2	2	7	7	2	4
indels	Yes	chr10	135035950	CGT	C	.	2018-01-01	9	22	16	18	5	6	1	1	2	2
indels	Yes	chr10	135144161	C	CAAAA	.	2018-01-01	35	38	14	14	3	3	7	7	8	8
indels	Yes	chr10	135150713	A	AAC	.	0/1	22	23	24	24	24	25	121	124	161	168
indels	Yes	chr10	135150717	C	CA	2018-01-01	0/1	17	23	20	25	19	26	97	127	114	183
indels	Yes	chr10	135157435	CTTT	C	.	2018-01-01	25	25	16	24	5	6	3	5	3	5
indels	Yes	chr10	13516523	CGATACCCGTCACCGCTGTTGGACTCGGGTT	C	.	0/1	18	37	5	18	2	13	10	10	0	1
indels	Yes	chr10	135202324	TGTCATCCCGGGGCTCTCTTTCTCCATGCAGGTCTG	T	.	2018-01-01	38	39	21	21	6	6	9	9	6	6
indels	Yes	chr10	135391486	C	CAGGT	.	0/1	26	41	0	1	6	6	0	7	0	0
indels	Yes	chr10	135451540	CT	C	.	0/1	12	19	2	18	5	5	1	10	0	1
indels	No evidence	chr10	135454588	T	TC	.	2018-01-01	8	9	0	0	3	3	3	3	1	1
indels	No evidence	chr10	135464104	T	TA	.	0/1	4	7	1	10	10	10	0	9	1	2
indels	No	chr10	135469796	C	CG	.	0/1	5	29	8	16	8	8	0	18	3	7
indels	Yes	chr10	135475238	CT	C	.	0/1	13	21	21	27	8	8	0	4	2	3
indels	No	chr10	135508801	GAC	G	.	0/1	0	15	0	2	3	7	1	16	1	6
indels	No	chr10	135513254	T	TC	.	0/1	3	17	3	8	7	8	3	18	3	6
indels	No	chr10	1359947	T	TGG	.	0/1	7	28	13	21	12	13	6	18	1	2
indels	Yes	chr10	13776840	CTATTTATT	C	.	0/1	16	27	6	14	7	7	1	14	1	1
indels	Yes	chr10	13776844	TTATT	T	.	0/1	22	27	11	13	7	7	15	15	1	1
indels	No	chr10	14090823	TTAGAATAGAATAGAA	T	.	2018-01-01	3	14	4	6	0	0	4	4	0	0
indels	Yes	chr10	14169997	CTCTTTCTT	C	.	0/1	13	30	8	23	0	3	8	9	1	10
indels	Yes	chr10	14216878	C	CTGTG	0|1	2018-01-01	10	37	10	21	1	9	12	13	2	2
indels	Yes	chr10	14241277	CTTATT	C	0/1	2018-01-01	26	36	23	30	11	17	7	7	2	2
indels	Yes	chr10	14437003	CTCTATCTATCTA	C	.	0/1	9	23	3	10	0	4	9	10	1	1
indels	Yes	chr10	14514325	A	AACACAC	.	2018-01-01	57	58	9	9	4	4	6	6	8	8
indels	Yes	chr10	14653483	TTATATATA	T	.	2018-01-01	24	48	13	15	2	5	4	6	2	3
indels	Yes	chr10	15007704	AGAGAGAGAGAGG	A	0|1	2018-01-01	35	37	26	27	6	6	13	13	0	0
indels	Yes	chr10	1502170	TGTAGCAAACCTGCCTGTGACCTGAGTTTACCTGC	T	.	2018-01-01	16	20	15	15	8	9	5	5	4	4
indels	Yes	chr10	1502241	AGCAAACCTGCCTGTGACCTGAGTTTACCTGCGTAACGAACCTGCCTGTGACCTGAGTTTACCTGCGTT	A	.	2018-01-01	22	23	1	2	2	2	1	2	1	1
indels	Yes	chr10	15163375	G	GT	.	0/1	15	55	0	31	3	7	0	7	3	16
indels	Yes	chr10	15305728	A	ATCTG	0/1	2018-01-01	21	24	23	29	6	7	2	3	4	5
indels	No	chr10	15523529	C	CAGAAAATTATCAATAATTTTCTTAGTAGTAATAATCACAGTTATTACTACTA	.	0/1	0	28	3	22	4	13	3	18	0	0
indels	Yes	chr10	1556373	A	AATATATATAT	.	2018-01-01	33	33	20	20	3	3	10	10	1	1
indels	Yes	chr10	15603208	C	CTA	.	2018-01-01	30	30	16	16	3	3	11	12	1	2
indels	Yes	chr10	15686432	AATATATATATATATATATATATAT	A	.	0/1	26	37	2	5	0	4	2	3	0	1
indels	Yes	chr10	15686446	TATATATATAT	T	.	0/1	31	36	6	7	3	3	1	1	1	1
indels	Yes	chr10	1571250	AAATCCTCCAATCAGTCCACCCACCATGCCCAACACC	A	.	0/1	19	39	4	13	3	17	16	18	0	6
indels	Yes	chr10	1571313	CCCCAACACAAATCCTCCAATCAGTCCACGCACCATCCCCAACACAAATCCTCCAATCAGTCCACGCACCATG	C	.	0/1	11	36	2	14	1	18	9	16	1	8
indels	No	chr10	1571341	CGCACCATCCCCAACACAAATCCTCCAATCAGTCCACGCACCATGCCCAACACCAATCCTCCAATCAGTCCACGCACCATCCCCAACACAAATCCTCCAATCAGTCCACGCACCATGCCCAACACCAATCCTCCAATCAGTCCAT	C	.	0/1	9	40	0	12	0	15	7	22	1	10
indels	No	chr10	15749960	GAC	G	.	0/1	6	42	10	17	9	12	0	10	1	2
indels	Yes	chr10	15782883	GATT	G	.	2018-01-01	10	14	17	17	6	7	3	3	0	0
indels	Yes	chr10	16223421	GGAAAGAAA	G	.	2018-01-01	13	41	8	18	1	5	3	4	2	6
indels	No	chr10	16582127	CGT	C	.	0/1	7	50	4	17	0	8	9	11	2	3
indels	Yes	chr10	16608366	C	CAGAGAG	.	2018-01-01	30	30	12	12	10	10	17	17	5	6
indels	No	chr10	16724534	TAC	T	.	0/1	0	45	0	16	3	11	0	7	2	5
indels	Yes	chr10	16764854	T	TATACATATATGTATATATACACACATATACATATATGTAAATATACACAC	.	0/1	16	44	15	37	0	15	26	28	3	12
indels	Yes	chr10	17144251	CCTATTTATTTAT	C	.	0/1	13	33	14	28	0	7	8	8	1	2
indels	Yes	chr10	17144252	CTATT	C	.	2018-01-01	31	34	12	12	5	5	7	7	2	2
indels	Yes	chr10	17219712	A	AACAC	.	2018-01-01	48	50	19	19	6	6	13	13	2	2
indels	Yes	chr10	17381113	C	CT	0/1	2018-01-01	14	32	14	30	1	3	6	6	1	2
indels	No	chr10	17598186	TAC	T	.	0/1	4	46	0	17	2	18	1	7	2	5
indels	Yes	chr10	17655096	GGTGTGT	G	.	0/1	8	30	11	15	1	2	5	6	2	6
indels	No evidence	chr10	17792892	CT	C	.	0/1	1	1	0	14	10	12	1	8	0	1
indels	No evidence	chr10	17796923	T	TTTTATTTA	.	0/1	0	0	0	10	4	4	0	10	0	1
indels	No evidence	chr10	17800322	CT	C	.	0/1	0	0	0	0	0	16	15	15	0	1
indels	No evidence	chr10	17803692	C	CA	.	2018-01-01	0	0	0	5	8	9	3	7	1	3
indels	No evidence	chr10	17808854	GT	G	.	0/1	0	0	0	9	1	16	12	13	0	1
indels	No evidence	chr10	17809912	C	CTT	.	0/1	0	1	3	12	3	15	12	13	0	4
indels	No evidence	chr10	17810095	T	TGTTTG	.	0/1	0	1	1	12	3	5	15	15	0	4
indels	No evidence	chr10	17810726	A	ATGTGTG	.	0/1	0	0	2	19	2	16	10	11	0	1
indels	No evidence	chr10	17811123	AC	A	.	0/1	0	1	0	2	1	19	25	25	0	0
indels	No evidence	chr10	17816025	TA	T	.	0/1	1	1	0	13	9	11	0	15	0	1
indels	No evidence	chr10	17816029	TTTG	T	.	0/1	0	1	0	12	11	12	0	16	0	1
indels	No evidence	chr10	17816797	T	TTCTCTCTCTCTCTC	.	0/1	0	0	0	7	6	6	0	7	0	0
indels	No evidence	chr10	17833290	TA	T	.	2018-01-01	2	2	0	0	6	7	6	6	0	0
indels	No evidence	chr10	17834082	T	TTTAA	.	0/1	1	2	0	0	0	9	4	4	0	1
indels	No evidence	chr10	17838653	G	GT	.	0/1	0	0	0	0	0	6	8	10	0	0
indels	No evidence	chr10	17848077	AG	A	.	2018-01-01	1	1	0	0	0	0	1	1	1	1
indels	No evidence	chr10	17861452	ATGTGTGTGTGTGTG	A	.	2018-01-01	0	0	0	0	2	2	0	0	0	0
indels	No evidence	chr10	17892260	GTTTT	G	.	2018-01-01	1	1	0	0	0	0	1	1	1	1
indels	No evidence	chr10	17902284	GT	G	.	0/1	0	0	0	0	0	1	0	1	1	1
indels	No evidence	chr10	17904232	TA	T	.	2018-01-01	0	0	0	0	0	0	3	3	5	5
indels	No evidence	chr10	17915507	CT	C	.	2018-01-01	0	0	0	0	0	0	0	0	2	2
indels	No evidence	chr10	17927833	CATCATGATCATGATCATGATCATG	C	.	2018-01-01	1	1	0	0	2	2	1	1	10	10
indels	No evidence	chr10	17928968	A	AAGC	.	2018-01-01	1	1	0	0	2	2	5	5	7	7
indels	No evidence	chr10	17941120	CA	C	.	2018-01-01	1	2	0	0	2	2	1	2	5	10
indels	No evidence	chr10	17942287	C	CCT	.	2018-01-01	1	2	0	0	1	1	0	0	3	3
indels	No evidence	chr10	17943703	C	CA	.	2018-01-01	0	2	0	0	0	0	3	3	5	6
indels	No evidence	chr10	17944452	TA	T	.	2018-01-01	2	2	0	0	2	2	0	0	3	3
indels	No evidence	chr10	17945970	CA	C	.	2018-01-01	3	3	0	0	2	2	0	0	5	6
indels	No evidence	chr10	17948314	C	CT	.	2018-01-01	1	2	0	0	2	2	1	1	10	11
indels	No evidence	chr10	17951300	A	AT	.	2018-01-01	0	1	0	0	5	5	0	1	8	8
indels	No evidence	chr10	17956351	ATG	A	.	2018-01-01	1	1	1	1	2	2	2	2	18	18
indels	No evidence	chr10	17959776	TATATA	T	.	2018-01-01	0	0	1	1	1	1	0	0	6	7
indels	No evidence	chr10	17972783	AT	A	.	0/1	1	2	3	6	0	0	0	0	5	8
indels	No evidence	chr10	18081072	T	TTTAA	.	2018-01-01	0	1	0	0	0	0	3	3	0	0
indels	No evidence	chr10	18094369	GGTGTGTGTGT	G	.	2018-01-01	0	0	0	0	4	5	5	5	4	4
indels	No evidence	chr10	18110488	T	TTG	.	2018-01-01	0	0	0	0	0	0	6	6	3	3
indels	No evidence	chr10	18119849	A	ATT	.	2018-01-01	1	1	3	4	1	1	1	1	2	2
indels	Yes	chr10	18488870	C	CTGTGTG	.	2018-01-01	43	45	14	14	8	8	1	1	3	3
indels	Yes	chr10	18674303	CT	C	.	0/1	20	35	8	15	6	6	0	8	0	0
indels	Yes	chr10	19237733	A	AATAT	.	2018-01-01	31	37	16	17	4	4	3	4	4	4
indels	Yes	chr10	19601329	ATG	A	.	0/1	11	42	1	19	4	8	0	17	0	1
indels	Yes	chr10	19771581	T	TAC	.	2018-01-01	57	60	19	20	5	6	7	8	0	0
indels	Yes	chr10	19851226	G	GTAGATAGA	.	2018-01-01	35	41	19	20	2	2	7	7	0	0
indels	Yes	chr10	19944459	GTATA	G	.	2018-01-01	23	37	9	17	3	3	3	6	6	7
indels	Yes	chr10	20058356	TTTTC	T	0/1	2018-01-01	18	32	11	19	3	5	1	3	0	2
indels	No	chr10	20107156	GGT	G	.	0/1	1	36	0	12	0	5	2	12	0	4
indels	Yes	chr10	20226473	GTATATATATATATA	G	.	2018-01-01	18	38	13	22	4	4	0	6	0	0
indels	Yes	chr10	20340324	AATATATATATATATATAT	A	.	0/1	23	44	8	18	2	2	0	2	0	0
indels	Yes	chr10	20361353	G	GAGAA	0/1	2018-01-01	21	34	12	23	0	4	11	11	0	0
indels	Yes	chr10	20478405	C	CATAT	.	2018-01-01	32	36	20	20	8	8	3	4	1	1
indels	Yes	chr10	20483119	CTGTGTG	C	.	0/1	16	42	7	15	15	15	0	8	2	3
indels	Yes	chr10	2061446	AAAGGAAGG	A	.	2018-01-01	23	24	14	15	1	1	2	2	0	1
indels	Yes	chr10	20636971	CCACACACA	C	.	0/1	13	32	7	21	3	3	1	10	1	2
indels	Yes	chr10	20698644	T	TTCCT	0|1	2018-01-01	23	30	9	10	7	9	3	3	3	3
indels	Yes	chr10	20729759	CTTT	C	.	0/1	19	44	2	7	0	16	3	3	0	0
indels	Yes	chr10	20729763	C	CA	.	0/1	20	45	2	7	0	16	3	3	0	0
indels	Yes	chr10	20956773	C	CTG	.	2018-01-01	29	29	23	24	9	12	6	6	5	7
indels	No	chr10	21251932	AACACAC	A	0/1	2018-01-01	9	39	9	19	4	4	0	5	0	2
indels	Yes	chr10	21632832	AAAAGAAAGAAAG	A	.	0/1	11	25	4	9	2	2	0	4	0	1
indels	Yes	chr10	21749567	T	TTTTG	.	2018-01-01	16	35	10	18	0	3	11	12	1	3
indels	Yes	chr10	21907958	T	TACACAC	.	2018-01-01	15	25	4	16	9	9	0	1	3	4
indels	No	chr10	22094368	GAC	G	.	0/1	0	33	1	17	2	9	1	10	0	1
indels	Yes	chr10	22141021	TACACACACAC	T	.	0/1	12	33	10	21	10	10	0	8	3	7
indels	Yes	chr10	22172180	AACACACACACACACAC	A	.	0/1	12	42	8	19	13	13	1	23	5	8
indels	No	chr10	22197418	T	TG	.	2018-01-01	9	37	10	23	6	6	12	20	4	4
indels	Yes	chr10	2262205	C	CATATAT	.	2018-01-01	58	59	16	16	14	14	5	5	4	4
indels	Yes	chr10	22635359	G	GTTC	.	0/1	10	12	3	5	0	2	5	5	2	3
indels	Yes	chr10	22956794	C	CTGTGTG	.	0/1	23	32	12	20	1	8	3	3	4	5
indels	Yes	chr10	23005344	G	GAC	.	2018-01-01	35	37	13	13	8	9	15	15	5	6
indels	No	chr10	23068987	TAC	T	.	0/1	2	35	5	19	5	5	0	8	0	2
indels	No evidence	chr10	23441128	ATAATATATGATAGATATTATATG	A	.	0/1	1	3	5	9	0	4	3	4	0	0
indels	Yes	chr10	23738255	G	GTTCCTTCC	.	2018-01-01	29	34	12	13	1	1	4	4	6	8
indels	Yes	chr10	2381032	CT	C	0/1	2018-01-01	19	27	13	19	6	6	1	2	7	12
indels	Yes	chr10	23980613	CGTGTGTGT	C	.	2018-01-01	24	44	17	17	1	1	1	1	18	18
indels	Yes	chr10	2399035	A	AAAT	2018-01-01	0/1	40	42	19	19	9	9	1	3	6	6
indels	Yes	chr10	24110033	CGTGTGTGTGTGT	C	.	0/1	15	45	11	21	4	4	0	2	6	16
indels	No	chr10	24119750	TAC	T	.	0/1	1	54	0	13	4	5	0	0	3	25
indels	No	chr10	24235872	GTGGT	G	.	0/1	2	36	0	41	2	7	4	11	3	14
indels	No	chr10	24271458	TTCTC	T	.	0/1	9	46	6	17	1	6	6	7	1	5
indels	Yes	chr10	24284379	CTGTGTG	C	.	0/1	10	37	9	19	0	5	7	7	1	2
indels	No	chr10	24456213	CGT	C	.	0/1	3	35	0	18	0	7	2	5	2	7
indels	Yes	chr10	24482730	T	TACAC	.	2018-01-01	31	33	19	21	5	8	9	9	6	6
indels	No	chr10	24604858	T	TG	0/1	2018-01-01	7	28	4	22	4	7	8	8	6	7
indels	Yes	chr10	24612717	CGTGTGTGTGT	C	.	2018-01-01	20	31	24	26	4	6	4	4	3	3
indels	Yes	chr10	246145	G	GGTGTGTGTGTGTGTGTGTGTGTGTGT	.	2018-01-01	43	43	17	17	3	3	9	9	6	6
indels	No	chr10	2470294	T	TA	.	0/1	0	27	0	21	0	16	2	2	3	12
indels	Yes	chr10	2470312	AT	A	.	0/1	8	28	0	19	0	15	3	3	3	13
indels	Yes	chr10	2474278	C	CGT	.	2018-01-01	29	30	21	21	8	8	6	8	1	1
indels	Yes	chr10	247525	T	TACACACAC	.	2018-01-01	44	44	24	24	16	16	14	14	9	9
indels	Yes	chr10	24824781	T	TA	2018-01-01	0/1	17	35	23	25	5	8	15	15	10	11
indels	Yes	chr10	25012602	CCCG	C	0/1	2018-01-01	5	19	10	18	2	2	1	2	0	0
indels	Yes	chr10	25027055	T	TTTA	.	2018-01-01	24	24	13	13	4	4	1	1	2	2
indels	Yes	chr10	25035186	TAAAAAAGGCGGAGCCTGCAGTGAGCCGAGATTGCGCCACTGCACTCCAGCCTGGGCGACAGCGAGACTCCGTCTCAAAAAAAAAAAAAAAAAAAAA	T	.	0/1	10	24	4	17	6	6	0	11	0	0
indels	Yes	chr10	2515854	ATGTG	A	.	0/1	18	42	13	28	12	12	3	10	0	0
indels	Yes	chr10	2515856	GTG	G	.	0/1	20	39	27	29	11	11	10	11	0	0
indels	Yes	chr10	25184617	G	GATATAT	.	2018-01-01	27	27	13	13	6	7	7	7	1	1
indels	Yes	chr10	25229965	TTG	T	.	2018-01-01	12	38	21	21	5	5	11	12	3	3
indels	No evidence	chr10	2523808	GGGCTTCACTTGGCCACCATATTGAAAATGACACAGA	G	.	0/1	0	3	2	10	0	7	6	6	0	0
indels	No	chr10	25596155	G	GT	.	0/1	5	31	0	35	5	11	0	10	0	10
indels	Yes	chr10	2564088	AGGCGACACCCACACCTTATC	A	.	0/1	18	25	3	4	26	33	33	43	22	32
indels	Yes	chr10	25661029	GA	G	.	2018-01-01	27	33	22	22	6	6	10	10	1	1
indels	No	chr10	259242	C	CTGTAGGACAATCATTAGCCCACAGAACACCA	.	0/1	0	51	0	23	1	13	4	15	0	9
indels	Yes	chr10	25939784	G	GAAGAAAGA	.	2018-01-01	21	23	9	9	2	2	5	5	4	4
indels	Yes	chr10	25997854	ATGTGTGTGTG	A	.	0/1	18	48	11	22	9	9	0	11	0	4
indels	Yes	chr10	26042329	AGAAGAAGAAGAAGAAGAAGAAAAGAAGAAGAAG	A	.	0/1	22	25	8	10	1	3	7	7	0	11
indels	Yes	chr10	26173818	CT	C	.	0/1	26	39	5	18	6	10	1	9	1	1
indels	No	chr10	26381104	T	TGCAAAGCCTCGGCCTCCCAAAGTGCTGGGATTACAGGCGTGAGCCACCGCACCCGGCCGAAGCTTTGCATTCTTAAG	.	0/1	0	40	0	29	0	4	2	14	3	13
indels	Yes	chr10	26584437	G	GCACACACACACA	.	2018-01-01	35	38	20	20	7	7	2	2	27	28
indels	Yes	chr10	2659078	C	CAT	.	2018-01-01	38	38	19	19	8	11	6	6	3	3
indels	Yes	chr10	26834720	AC	A	1|0	2018-01-01	29	32	29	30	8	8	8	9	0	0
indels	Yes	chr10	27123477	A	AACACAC	.	0/1	22	34	8	19	0	9	9	9	1	1
indels	No	chr10	27151408	ATGG	A	.	0/1	0	25	0	25	0	0	0	15	0	18
indels	Yes	chr10	27637091	CTTTCCTTTCTTTCTTTCTTT	C	.	0/1	7	25	9	28	7	7	0	16	1	3
indels	Yes	chr10	27721589	AGTGTGTGTGTGT	A	.	2018-01-01	18	27	24	24	3	3	7	7	1	1
indels	No	chr10	2783084	G	GGAATGTTTGTGACGTTTAAACATTTCTCCATAATGACTGGGTACTTGAGTAATGATTAAACGTCACAAACATTCCC	.	0/1	0	34	0	20	3	5	2	11	0	8
indels	Yes	chr10	27974372	ATTTT	A	.	0/1	29	33	14	15	5	7	9	9	0	0
indels	Yes	chr10	27995474	C	CTGTG	.	2018-01-01	32	40	16	17	9	13	13	14	4	5
indels	Yes	chr10	28046026	A	AGT	.	2018-01-01	45	47	14	14	8	8	7	7	1	2
indels	Yes	chr10	28327378	A	AGTGT	.	2018-01-01	30	32	21	21	10	11	8	9	3	3
indels	Yes	chr10	28621175	C	CGT	.	2018-01-01	46	46	31	31	2	2	9	13	1	1
indels	Yes	chr10	28645868	ATT	A	.	0/1	20	31	5	12	9	14	1	9	1	3
indels	Yes	chr10	28660194	T	TCACACA	.	2018-01-01	50	51	17	17	5	5	8	8	3	3
indels	Yes	chr10	28997458	C	CGG	.	2018-01-01	29	30	24	24	10	10	4	4	3	3
indels	Yes	chr10	28997461	ACG	A	.	2018-01-01	21	29	25	25	9	10	4	4	3	3
indels	Yes	chr10	29006929	TTTCCTTCCTTCCTTCCTTCC	T	.	0/1	12	36	6	13	10	11	2	8	0	3
indels	Yes	chr10	29095461	A	AACACACACACACAC	.	2018-01-01	27	28	14	14	10	10	8	8	11	11
indels	No	chr10	29162295	GTA	G	.	0/1	0	33	0	18	2	4	1	6	1	7
indels	Yes	chr10	29326825	A	ATTAT	.	2018-01-01	28	32	12	13	3	3	8	8	2	2
indels	No	chr10	29551895	AAG	A	.	0/1	1	35	0	25	2	7	2	16	0	3
indels	Yes	chr10	29623341	T	TATATATATACAC	.	2018-01-01	23	23	21	21	12	12	4	7	2	2
indels	Yes	chr10	29677943	CTG	C	.	0/1	12	40	13	23	8	9	2	8	2	2
indels	Yes	chr10	29677945	G	GTC	1|0	2018-01-01	22	37	10	22	3	8	7	7	0	2
indels	Yes	chr10	29728733	C	CCTCACA	.	0/1	10	23	7	21	1	8	7	7	0	1
indels	No	chr10	29729236	GAT	G	.	0/1	0	40	0	14	3	6	0	5	0	2
indels	Yes	chr10	30061897	TGAGAGAGAGAGA	T	.	0/1	13	34	6	20	9	9	0	5	0	7
indels	Yes	chr10	30066644	C	CAAAAAAAAA	.	2018-01-01	39	40	27	27	9	9	10	10	2	2
indels	Yes	chr10	3019737	GAA	G	.	2018-01-01	26	34	11	11	3	3	6	6	7	10
indels	Yes	chr10	30529743	G	GAAGAAAGAAAGA	.	2018-01-01	35	37	20	20	0	0	0	0	18	19
indels	No	chr10	30537347	AAG	A	.	0/1	1	35	0	24	0	0	0	4	5	23
indels	Yes	chr10	310823	GCTGTAGGGTACAGGGCATGGGGTACGGTGTCTGGTGCATGTCACTAGGTTGACTCACAGCTGTAGGGTACAGGGCATGGGGTATGGTGTCCGGTGTATGTCACTAGGTTGACTCATAA	G	.	0/1	10	21	7	12	5	5	2	7	1	4
indels	No	chr10	31452833	GAT	G	0/1	2018-01-01	8	52	10	14	3	3	3	5	3	3
indels	No	chr10	31454098	TTGTGTG	T	0/1	2018-01-01	11	57	7	15	11	11	0	27	1	5
indels	Yes	chr10	31663975	T	TACACACAC	.	2018-01-01	59	60	28	28	8	8	11	11	6	6
indels	Yes	chr10	31686088	T	TTTA	.	2018-01-01	24	31	6	16	5	5	0	1	6	9
indels	No	chr10	31871884	C	CCCTGGGGCAGTGGCTGCATGTTTGTCCCATGGCTTCTCAGGG	.	0/1	0	28	0	29	2	10	1	3	0	3
indels	Yes	chr10	31959465	T	TATACACACACACACAC	.	0/1	29	47	9	20	26	26	0	26	7	8
indels	No	chr10	32036057	GAC	G	.	0/1	9	39	12	24	2	14	14	14	2	5
indels	Yes	chr10	32105096	C	CGTGTGT	.	0/1	30	31	21	21	6	7	6	6	6	6
indels	No	chr10	32159013	C	CAAATGTTTGGTAGCCTGATACTGTCAGGCTACCAAACATTTGTGGT	.	0/1	0	50	0	28	0	5	5	10	0	2
indels	Yes	chr10	32222790	C	CATATATATATATAT	.	0/1	19	46	3	13	4	4	0	4	1	2
indels	Yes	chr10	32376628	CTT	C	.	2018-01-01	28	39	19	23	6	8	8	12	2	3
indels	Yes	chr10	32377349	C	CA	.	0/1	18	35	20	21	6	6	5	6	1	1
indels	Yes	chr10	32377358	AT	A	1|0	2018-01-01	34	35	21	21	6	6	6	6	1	1
indels	Yes	chr10	32497461	C	CTT	.	2018-01-01	18	38	17	18	2	2	8	9	7	9
indels	Yes	chr10	32497659	C	CG	.	2018-01-01	22	38	25	25	4	4	7	8	13	14
indels	No	chr10	32637301	G	GT	.	0/1	1	30	0	27	2	4	0	14	4	20
indels	No	chr10	32637304	CA	C	.	0/1	1	31	0	29	2	4	0	13	4	20
indels	Yes	chr10	32640970	AT	A	.	0/1	19	32	2	15	4	6	1	10	6	14
indels	Yes	chr10	32689977	C	CTCCT	.	2018-01-01	34	39	11	11	8	8	6	6	4	5
indels	Yes	chr10	32822174	A	AACAC	.	2018-01-01	38	43	18	19	16	16	7	7	3	3
indels	Yes	chr10	32965138	C	CA	.	2018-01-01	20	31	8	8	3	3	1	1	0	0
indels	Yes	chr10	33117386	AGAAGAAGAG	A	.	0/1	14	40	9	17	5	6	0	6	4	6
indels	Yes	chr10	33163681	T	TACAC	.	2018-01-01	39	43	26	26	8	9	5	6	2	2
indels	No	chr10	33167321	A	AAT	.	0/1	1	45	0	23	4	17	4	20	0	4
indels	Yes	chr10	33183511	GCTTTGCCCCAGCCA	G	.	2018-01-01	42	43	18	18	7	7	7	7	1	2
indels	Yes	chr10	33313293	T	TTTCCTTCCTTCCTTCCTTCCTTCC	.	2018-01-01	31	31	12	12	3	3	8	8	4	4
indels	Yes	chr10	33317178	CTTTCTTTCTTTCTTTCTTTCTTTCTTTCTTTG	C	.	0/1	19	22	11	14	2	4	2	2	1	2
indels	No	chr10	33374486	G	GAACACTCTATTTCTTCATCTGTTCAGTAGGAA	.	0/1	0	33	0	27	1	13	4	23	1	3
indels	Yes	chr10	33527833	C	CTG	.	2018-01-01	41	43	24	24	10	10	13	14	3	3
indels	No	chr10	33532861	TTG	T	.	0/1	4	33	0	16	1	4	1	10	2	6
indels	Yes	chr10	33845923	AT	A	0/1	2018-01-01	15	30	10	21	1	3	12	12	0	1
indels	No	chr10	33996041	A	ATTGTGTGGTG	.	0/1	0	44	0	28	1	6	1	16	3	12
indels	Yes	chr10	3409640	GATTATT	G	.	2018-01-01	13	21	7	14	0	3	8	8	2	2
indels	Yes	chr10	34487381	GGT	G	.	2018-01-01	16	36	9	19	4	7	4	4	1	1
indels	Yes	chr10	34702072	T	TAC	.	0/1	43	60	11	21	0	9	10	12	1	4
indels	No	chr10	34831162	T	TGTGTGCAC	TGTGTGTGCAC	.	2018-02-01	6	36	7	18	8	11	0	chr10	1	7
indels	Yes	chr10	34894108	ATT	A	.	2018-01-01	22	31	5	13	3	7	2	6	0	1
indels	Yes	chr10	34900735	CT	C	.	0/1	24	32	2	19	1	5	11	19	1	3
indels	No	chr10	34973806	TAC	T	.	0/1	8	49	11	21	13	14	1	13	0	1
indels	Yes	chr10	35110807	AAAAAG	A	.	0/1	19	38	4	25	0	10	4	5	0	1
indels	No	chr10	35281167	AACACAC	A	.	0/1	6	33	8	19	0	4	2	2	3	10
indels	Yes	chr10	35438817	A	AACAC	.	2018-01-01	46	46	23	23	2	2	1	1	15	17
indels	No	chr10	3550079	TCACA	T	.	0/1	8	33	9	16	15	19	0	13	0	0
indels	Yes	chr10	35579150	T	TCA	.	2018-01-01	33	34	19	20	3	4	3	3	8	9
indels	No	chr10	35624827	GAC	G	.	0/1	1	42	0	20	0	1	1	1	2	16
indels	No	chr10	35676895	T	TCAAC	.	0/1	0	36	0	28	0	15	3	3	6	30
indels	No	chr10	35676897	AGTTG	A	.	0/1	0	36	0	30	0	15	3	3	6	30
indels	No	chr10	35705088	CGT	C	.	0/1	2	36	0	17	3	3	0	0	1	12
indels	Yes	chr10	35771677	G	GGT	.	2018-01-01	45	45	15	15	0	0	0	0	12	14
indels	Yes	chr10	35793965	CT	C	.	0/1	20	41	2	24	0	2	1	4	7	25
indels	Yes	chr10	35876282	GTCTCTCTCTCTCTCTCTCTCTCTCTC	G	.	2018-01-01	20	38	17	21	3	3	5	5	4	44
indels	Yes	chr10	35972969	A	ATTT	.	2018-01-01	50	53	23	23	3	3	5	5	8	8
indels	Yes	chr10	36187136	CTGTG	C	.	2018-01-01	23	33	13	14	10	12	5	6	2	2
indels	Yes	chr10	36294748	G	GAA	.	2018-01-01	21	37	32	33	8	8	8	10	2	2
indels	Yes	chr10	36300115	G	GC	.	0/1	8	24	2	10	4	4	0	15	0	2
indels	Yes	chr10	36359756	CGTGTGT	C	.	0/1	11	40	12	21	0	10	7	7	0	3
indels	No	chr10	36416802	T	TTC	.	2018-01-01	3	38	0	15	3	9	1	14	0	1
indels	No	chr10	36416804	TGA	T	.	2018-01-01	0	38	0	15	3	9	1	14	0	1
indels	No	chr10	36441686	ATT	A	.	0/1	0	35	0	25	2	7	1	10	1	6
indels	No	chr10	36499444	A	ATGTAATTGCAAAAACTAATAGTATATATTTTCAAAAATATATACTATTAGTTTTTGCAATTACATGT	.	0/1	0	44	0	15	2	6	0	5	0	0
indels	Yes	chr10	36597772	G	GGGAAGGAA	.	0/1	28	39	10	18	1	8	14	14	0	0
indels	Yes	chr10	36724958	CACACACAT	C	1|0	2018-01-01	9	30	7	15	7	16	14	14	4	7
indels	Yes	chr10	36724962	CACAT	C	0|1	2018-01-01	25	31	17	17	16	18	15	15	8	8
indels	No	chr10	36847372	GTGTGTA	G	.	0/1	4	28	2	13	1	23	7	9	1	1
indels	Yes	chr10	36930933	CACACACACACACACACACACACACACACACAT	C	1|0	2018-01-01	43	49	14	18	11	12	7	10	2	5
indels	Yes	chr10	36930937	CACACACACACACACACACACACACACAT	C	0|1	2018-01-01	48	49	17	17	9	12	10	10	2	5
indels	Yes	chr10	36939118	ATGTGTGTGTGTG	A	.	0/1	24	35	12	15	5	5	3	3	0	1
indels	Yes	chr10	36939122	GTGTGTGTG	G	.	0/1	27	36	18	18	7	7	9	9	0	0
indels	Yes	chr10	36981744	CG	C	.	0/1	27	32	16	27	8	11	1	12	1	4
indels	Yes	chr10	37153434	AAAATAAAT	A	.	2018-01-01	37	40	17	17	8	8	2	2	2	2
indels	Yes	chr10	37557825	T	TAC	.	2018-01-01	45	45	22	23	2	2	2	3	4	6
indels	Yes	chr10	3803010	T	TTTCC	.	2018-01-01	29	35	19	19	9	9	12	12	1	1
indels	Yes	chr10	38032068	TG	T	.	0/1	23	31	15	21	1	21	9	14	1	4
indels	Yes	chr10	38522132	CT	C	.	0/1	16	33	8	24	2	9	8	10	1	2
indels	Yes	chr10	38523627	C	CAAAAA	.	0/1	23	44	2	15	0	4	6	6	0	0
indels	Yes	chr10	38528368	G	GAAAAAA	.	0/1	17	28	13	23	0	14	12	13	0	4
indels	Yes	chr10	38538808	A	AT	0/1	2018-01-01	17	30	18	32	0	3	11	12	4	7
indels	Yes	chr10	38566285	CT	C	.	0/1	31	58	14	34	0	12	22	22	4	14
indels	Yes	chr10	38567495	TA	T	.	0/1	25	49	6	30	5	31	12	12	1	11
indels	Yes	chr10	38568627	TG	T	.	0/1	24	54	7	25	1	28	30	31	1	18
indels	Yes	chr10	38681390	A	AGAT	.	0/1	15	25	10	24	6	6	0	11	1	4
indels	Yes	chr10	38681391	TAAAA	T	.	0/1	17	31	10	24	6	6	0	11	1	4
indels	Yes	chr10	3869159	AACACACAC	A	.	2018-01-01	23	63	9	25	9	10	1	5	2	4
indels	Yes	chr10	38711331	T	TTGTGTGTGTG	.	0/1	19	29	0	16	4	4	1	8	1	3
indels	Yes	chr10	38747220	C	CAAAA	.	0/1	10	30	9	14	10	10	0	6	1	3
indels	Yes	chr10	38766184	T	TCA	.	2018-01-01	20	21	9	9	17	18	16	20	4	4
indels	Yes	chr10	38932410	A	AT	.	0/1	7	24	1	12	10	10	1	15	1	3
indels	No	chr10	38933663	T	TTTTTTTTTC	.	0/1	1	20	0	13	2	6	0	17	3	3
indels	Yes	chr10	38944316	AT	A	.	0/1	19	38	5	15	16	16	1	11	0	1
indels	Yes	chr10	38945416	TA	T	.	0/1	22	42	15	28	11	11	0	15	3	4
indels	Yes	chr10	38948301	CTTT	C	.	0/1	17	34	4	40	13	14	0	5	0	8
indels	Yes	chr10	38948698	C	CA	.	0/1	20	38	9	23	17	18	1	16	1	1
indels	Yes	chr10	38972231	CA	C	.	2018-01-01	14	28	10	18	1	9	9	10	1	2
indels	Yes	chr10	39101066	G	GTTCCATTCCA	.	0/1	15	20	10	16	1	9	4	4	1	1
indels	No	chr10	39101984	GTTCCATTCCATTCCATTCCATTCCA	G	.	0/1	4	24	8	24	7	19	0	25	1	7
indels	Yes	chr10	3984316	AAG	A	.	0/1	7	21	9	20	2	14	7	10	3	4
indels	Yes	chr10	4120361	AAAAG	A	.	2018-01-01	16	17	9	10	5	5	1	2	0	2
indels	Yes	chr10	4251204	C	CAGAGAGAG	.	2018-01-01	29	39	9	12	0	0	8	8	5	5
indels	Yes	chr10	4304068	CTTCT	C	.	2018-01-01	15	23	10	16	1	2	4	4	1	4
indels	Yes	chr10	43267495	GC	G	1|0	2018-01-01	31	34	26	28	12	12	9	9	5	5
indels	Yes	chr10	4363845	C	CTTTTT	.	0/1	28	31	25	25	13	13	17	17	2	2
indels	No	chr10	43638941	ATGTG	A	.	0/1	8	44	6	16	4	4	0	8	2	3
indels	Yes	chr10	44268891	C	CTATATA	.	2018-01-01	39	42	10	11	3	3	0	1	1	1
indels	Yes	chr10	44729642	TTTATTATTA	T	.	0/1	15	30	13	20	0	10	4	5	2	2
indels	No	chr10	45214059	ATGGT	A	.	0/1	2	39	0	22	2	13	3	11	1	14
indels	No	chr10	45214063	T	TACCA	.	0/1	0	39	0	20	2	13	3	11	1	14
indels	Yes	chr10	45247126	T	TTTTC	2018-01-01	0/1	20	25	15	19	2	3	0	6	3	7
indels	No	chr10	45259726	GCTCTCTCT	G	.	0/1	2	48	3	14	3	5	1	6	1	4
indels	No	chr10	45348485	CAT	C	.	0/1	1	40	0	23	1	14	2	5	2	9
indels	No	chr10	45816434	AG	A	.	0/1	6	36	0	26	0	17	3	17	1	5
indels	Yes	chr10	460679	G	GTGTGTATATATA	.	0/1	23	37	13	24	5	5	0	14	1	4
indels	Yes	chr10	46079574	CATATATAT	C	.	2018-01-01	18	45	10	19	4	5	3	12	0	0
indels	Yes	chr10	4615053	A	AATAT	.	2018-01-01	30	37	9	20	4	4	2	3	3	3
indels	Yes	chr10	46254740	C	CCA	.	2018-01-01	9	10	2	2	6	6	3	4	3	3
indels	Yes	chr10	46254741	C	CA	.	2018-01-01	9	10	2	3	3	8	3	3	3	3
indels	No evidence	chr10	46292053	A	AAAACAAAC	.	0/1	2	2	2	18	0	5	8	8	0	4
indels	No evidence	chr10	46302268	A	AAGAG	.	2018-01-01	0	0	0	0	7	7	7	7	0	0
indels	No evidence	chr10	46306436	CA	C	.	0/1	0	0	0	0	2	2	1	10	2	2
indels	No evidence	chr10	46311434	A	ATT	.	2018-01-01	0	0	0	0	4	4	7	7	0	0
indels	No evidence	chr10	46319890	GT	G	.	0/1	0	1	0	1	0	4	5	5	0	0
indels	No evidence	chr10	46336552	ATT	A	.	0/1	1	1	0	0	0	1	3	4	1	1
indels	No evidence	chr10	46338744	C	CAAAA	.	2018-01-01	1	2	0	0	0	0	2	2	0	0
indels	No evidence	chr10	46344923	T	TGA	.	0/1	0	1	0	0	3	3	0	6	1	2
indels	No evidence	chr10	46344924	T	TG	.	0/1	0	1	0	0	3	3	0	6	0	2
indels	No evidence	chr10	46352587	TCACACA	T	.	0/1	0	0	1	3	0	3	6	7	2	4
indels	No evidence	chr10	46353025	G	GGT	.	2018-01-01	0	0	0	0	0	0	10	10	1	1
indels	No evidence	chr10	46398523	G	GA	.	2018-01-01	0	0	0	0	0	0	4	4	0	0
indels	No evidence	chr10	46574984	GA	G	.	0/1	0	0	0	0	2	3	0	0	0	1
indels	No evidence	chr10	46592005	AT	A	.	0/1	0	0	0	0	0	2	2	2	0	2
indels	No evidence	chr10	46592703	GT	G	.	0/1	1	1	0	0	1	3	1	1	1	1
indels	No evidence	chr10	46593401	TAGAC	T	.	0/1	0	1	0	0	0	3	3	3	0	0
indels	No evidence	chr10	46620341	A	AACAC	.	2018-01-01	0	0	0	0	1	1	0	0	1	1
indels	Yes	chr10	46690972	A	AG	.	2018-01-01	29	38	5	5	6	6	1	1	4	5
indels	Yes	chr10	46692025	A	ACG	.	2018-01-01	33	38	7	7	10	10	4	4	13	16
indels	Yes	chr10	46692032	C	CACAT	.	0/1	28	37	8	8	10	10	0	3	8	15
indels	Yes	chr10	46692034	C	CAT	.	0/1	30	38	7	7	10	10	0	3	9	16
indels	Yes	chr10	46695979	ATGAG	A	.	2018-01-01	11	11	0	0	3	3	3	3	3	3
indels	No evidence	chr10	46698546	ATTTTT	A	.	0/1	6	6	8	8	3	4	0	1	5	6
indels	No evidence	chr10	46819887	T	TATAA	.	2018-01-01	0	0	0	0	0	0	0	0	3	3
indels	No evidence	chr10	46868095	TA	T	.	2018-01-01	0	0	0	0	0	0	3	3	1	1
indels	No evidence	chr10	46868099	TA	T	.	2018-01-01	0	0	0	0	0	0	3	3	1	1
indels	No evidence	chr10	46891755	G	GT	.	2018-01-01	0	0	0	0	0	0	5	5	2	2
indels	Yes	chr10	46989839	CA	C	.	0/1	30	45	29	39	17	17	0	5	3	3
indels	No	chr10	47149885	A	ATT	.	0/1	10	41	0	29	6	6	0	24	0	4
indels	No evidence	chr10	47160230	G	GA	.	0/1	1	3	10	11	0	1	6	6	3	4
indels	No evidence	chr10	47161890	AT	A	.	0/1	1	2	0	0	0	0	6	9	0	0
indels	No evidence	chr10	47177208	CAT	C	.	0/1	0	3	0	0	0	3	3	3	0	4
indels	No evidence	chr10	47209903	T	TA	.	0/1	0	0	0	0	0	3	5	5	0	0
indels	No evidence	chr10	47218371	TA	T	.	0/1	1	1	0	0	5	5	0	5	1	4
indels	No evidence	chr10	47222493	AACACAC	A	.	2018-01-01	0	0	0	0	4	5	0	0	1	2
indels	No evidence	chr10	47242215	GATGGAA	G	.	0/1	0	0	0	0	6	6	0	9	5	7
indels	No evidence	chr10	47248524	A	ATGTG	.	2018-01-01	1	1	0	0	0	0	3	4	2	2
indels	No evidence	chr10	47278823	CTT	C	.	0/1	0	0	0	1	1	5	4	6	1	6
indels	No evidence	chr10	47279917	T	TGATAGATA	.	2018-01-01	0	0	0	0	2	2	8	8	1	1
indels	No evidence	chr10	47285696	AG	A	.	0/1	0	0	0	0	0	10	13	13	1	1
indels	No evidence	chr10	47306237	CT	C	.	0/1	0	0	0	0	1	6	2	5	3	5
indels	Yes	chr10	47367013	GA	G	.	0/1	7	13	9	19	7	8	0	11	0	1
indels	Yes	chr10	4739992	TGATA	T	0/1	2018-01-01	28	34	11	11	12	14	4	4	0	0
indels	Yes	chr10	47411004	CA	C	.	0/1	3	11	0	25	1	6	0	2	6	17
indels	Yes	chr10	47705833	CA	C	.	0/1	17	25	0	10	9	10	0	9	1	1
indels	Yes	chr10	47708270	AGCCGGG	A	.	0/1	11	23	0	3	5	5	0	9	0	0
indels	Yes	chr10	47711117	CT	C	.	0/1	12	16	0	2	3	4	0	8	0	0
indels	Yes	chr10	47712504	C	CT	.	0/1	7	20	5	12	0	6	4	4	0	0
indels	Yes	chr10	47717765	ATATG	A	1|0	2018-01-01	20	25	10	13	4	6	5	5	0	0
indels	No	chr10	47730928	A	AC	.	2018-01-01	0	11	5	18	9	10	0	7	0	0
indels	Yes	chr10	47730929	C	CA	.	0/1	5	11	8	16	1	7	7	7	0	0
indels	No evidence	chr10	47750198	G	GTGGA	.	0/1	3	8	9	9	9	9	0	3	2	2
indels	No evidence	chr10	47770650	TTTA	T	.	2018-01-01	0	0	0	0	0	0	0	0	2	4
indels	No evidence	chr10	47899794	ATT	A	.	2018-01-01	0	0	0	0	2	2	0	0	0	0
indels	No evidence	chr10	47901586	G	GT	.	2018-01-01	0	0	0	0	5	6	1	1	4	5
indels	No evidence	chr10	47950399	CG	C	.	2018-01-01	0	1	4	7	8	8	0	0	0	0
indels	No evidence	chr10	47953851	TAAAATAAAG	T	.	0/1	2	5	0	0	0	11	5	5	0	0
indels	No	chr10	47968076	A	AG	.	0/1	3	14	0	16	0	11	9	9	3	8
indels	Yes	chr10	47968387	AAGAC	A	0/1	2018-01-01	14	14	3	7	5	5	8	8	0	0
indels	No evidence	chr10	47981044	CT	C	.	0/1	0	2	1	14	0	14	7	7	0	3
indels	No evidence	chr10	48002382	G	GTA	.	0/1	4	4	0	0	13	14	3	10	0	0
indels	No evidence	chr10	48012750	AT	A	.	0/1	0	0	0	3	0	6	2	2	0	0
indels	No evidence	chr10	48013459	TACACAC	T	.	0/1	0	0	0	0	0	3	8	8	0	0
indels	No evidence	chr10	48026659	A	AACACACAC	.	0/1	2	3	0	1	0	3	4	4	0	0
indels	No evidence	chr10	48036165	GGATA	G	.	0/1	0	2	0	3	0	4	3	3	0	0
indels	No evidence	chr10	48036169	A	AGATAGATA	.	0/1	2	2	3	3	7	7	0	2	0	0
indels	No evidence	chr10	48187126	TATTTCC	T	.	0/1	0	0	0	0	5	5	0	2	1	1
indels	No evidence	chr10	48206810	ATGTGTG	A	.	0/1	0	1	0	0	3	3	0	0	0	1
indels	No evidence	chr10	48210961	AT	A	.	0/1	1	1	0	0	3	4	1	4	1	5
indels	No evidence	chr10	48258453	CGATG	C	.	2018-01-01	0	0	0	0	1	1	0	0	0	7
indels	Yes	chr10	48361643	C	CGTGTGTGT	.	0/1	17	34	11	14	0	4	7	7	3	4
indels	Yes	chr10	48501001	T	TGT	.	0/1	20	38	2	19	1	10	9	9	0	2
indels	No evidence	chr10	48891399	AC	A	.	0/1	2	2	0	11	0	0	2	10	1	5
indels	No evidence	chr10	48891403	A	AG	.	0/1	0	2	0	11	0	0	2	10	1	5
indels	No evidence	chr10	48918795	CA	C	.	0/1	0	0	0	7	0	0	1	9	6	12
indels	No evidence	chr10	48925203	CT	C	.	0/1	0	1	0	2	0	0	0	2	2	3
indels	No evidence	chr10	48931942	AAC	A	.	2018-01-01	0	1	0	0	0	0	1	1	2	3
indels	No evidence	chr10	49081508	G	GT	.	2018-01-01	1	1	0	0	1	1	0	0	2	2
indels	No evidence	chr10	49203913	GT	G	.	2018-01-01	9	9	4	7	0	0	0	0	5	7
indels	No evidence	chr10	49235558	CA	C	.	2018-01-01	2	5	1	2	0	0	1	2	4	5
indels	No evidence	chr10	49241902	AT	A	.	0/1	4	4	6	10	0	0	0	0	6	10
indels	No evidence	chr10	49250690	C	CT	.	2018-01-01	0	0	5	5	2	2	1	1	4	4
indels	No evidence	chr10	49256568	TA	T	.	2018-01-01	1	1	0	0	0	0	2	3	7	7
indels	No evidence	chr10	49261198	TTTTGTTTG	T	.	2018-01-01	2	3	0	0	0	0	2	2	1	1
indels	Yes	chr10	49270324	CA	C	.	2018-01-01	12	17	1	3	0	0	2	3	4	4
indels	No evidence	chr10	49275188	A	AGTG	.	2018-01-01	3	3	0	0	0	0	0	0	2	2
indels	Yes	chr10	4936906	G	GACACAC	.	2018-01-01	51	52	30	30	11	11	7	7	4	4
indels	Yes	chr10	49430021	T	TTGGA	0/1	2018-01-01	22	40	11	25	35	39	2	19	79	133
indels	Yes	chr10	49495131	TACACAC	T	.	2018-01-01	15	45	6	12	1	2	2	5	1	1
indels	Yes	chr10	49562846	AC	A	.	0/1	20	38	17	33	21	21	0	16	2	3
indels	No	chr10	4957882	CAT	C	.	0/1	4	45	13	21	11	13	1	7	1	4
indels	Yes	chr10	49611960	T	TTGTGTGTG	.	0/1	20	32	9	22	10	10	1	6	0	0
indels	Yes	chr10	4971376	AC	A	.	2018-01-01	37	37	8	8	5	5	1	1	0	0
indels	Yes	chr10	4971383	A	ATAT	.	2018-01-01	36	37	8	8	5	5	1	1	0	0
indels	Yes	chr10	4971387	TG	T	.	2018-01-01	36	37	8	8	5	5	1	1	0	0
indels	No	chr10	49833738	TAC	T	.	2018-01-01	6	42	16	16	9	10	7	7	6	7
indels	Yes	chr10	49889629	C	CATATATATAT	.	2018-01-01	29	30	26	26	11	12	6	6	2	2
indels	Yes	chr10	50136398	C	CGTGTGTGT	.	2018-01-01	39	40	18	18	14	15	12	13	7	7
indels	Yes	chr10	50228772	A	AGGAAGGAAGGAAG	.	0/1	17	28	7	14	1	5	9	9	3	3
indels	Yes	chr10	50420732	GAGGGAGGAAGGAAGGAAGGAAGGAAGGAAGGAAGGAAGGA	G	.	0/1	12	28	6	23	7	9	1	10	2	9
indels	Yes	chr10	50425353	C	CGTGT	.	2018-01-01	29	30	10	10	9	9	6	6	5	5
indels	Yes	chr10	50972243	C	CGTGTGT	.	2018-01-01	24	24	15	15	8	8	6	6	8	9
indels	No evidence	chr10	51360808	T	TTGTTATAA	.	0/1	1	3	0	0	0	5	4	4	0	0
indels	No evidence	chr10	51362454	T	TAAA	.	0/1	0	2	6	6	0	4	7	7	0	0
indels	No evidence	chr10	51364472	CAAAAA	C	.	0/1	0	1	0	0	0	2	6	6	0	1
indels	No evidence	chr10	51365124	ATC	A	.	0/1	0	1	0	1	0	7	3	3	0	1
indels	No evidence	chr10	51365762	AT	A	.	0/1	0	2	1	25	1	5	5	6	0	0
indels	No evidence	chr10	51366404	C	CT	.	0/1	0	2	0	0	0	6	3	3	0	1
indels	No evidence	chr10	51366575	A	AAATAGTTT	.	0/1	0	2	0	0	0	6	5	5	0	1
indels	No evidence	chr10	51366656	CA	C	.	0/1	0	2	0	0	0	2	4	4	0	0
indels	No evidence	chr10	51367092	ACT	A	.	0/1	0	1	0	0	0	5	3	3	0	0
indels	No evidence	chr10	51367960	A	AT	.	0/1	0	0	0	24	4	8	0	10	0	1
indels	No evidence	chr10	51371103	GC	G	.	0/1	1	2	0	0	0	4	2	2	0	0
indels	No evidence	chr10	51371122	AT	A	.	0/1	1	2	0	0	0	1	2	2	0	0
indels	No evidence	chr10	51371950	CTTGA	C	.	0/1	3	3	0	0	0	4	2	2	0	0
indels	No evidence	chr10	51372467	G	GACTC	.	0/1	2	3	0	0	0	3	6	6	0	1
indels	No evidence	chr10	51372731	T	TAAAA	.	0/1	3	4	0	0	0	3	2	2	0	0
indels	No evidence	chr10	51373528	CT	C	.	0/1	2	2	0	0	0	8	5	5	0	0
indels	No evidence	chr10	51376947	CA	C	.	2018-01-01	3	3	0	0	1	1	4	4	0	0
indels	No evidence	chr10	51377208	C	CAGTG	.	0/1	2	3	0	0	0	6	3	3	0	0
indels	No evidence	chr10	51377382	TA	T	.	0/1	2	3	0	0	0	4	3	3	0	0
indels	No evidence	chr10	51377850	C	CA	.	0/1	3	3	0	1	0	2	8	8	0	1
indels	No evidence	chr10	51379530	C	CTTTTTTTTTTTTTTTT	.	0/1	3	3	0	0	0	0	5	5	0	0
indels	No evidence	chr10	51380706	A	AT	.	0/1	2	2	0	0	0	4	4	4	0	0
indels	No evidence	chr10	51381358	CT	C	.	0/1	2	2	0	0	0	3	4	4	0	0
indels	No evidence	chr10	51381623	G	GT	.	0/1	0	2	0	0	0	6	3	3	0	0
indels	No evidence	chr10	51381730	CT	C	.	0/1	1	1	0	0	0	4	5	5	0	0
indels	No evidence	chr10	51382579	C	CT	.	0/1	1	1	0	0	0	3	4	4	0	0
indels	No evidence	chr10	51383430	A	AGC	.	0/1	0	0	0	0	0	2	3	3	0	0
indels	No evidence	chr10	51384045	C	CTTATTATTATTA	.	0/1	1	1	0	0	0	2	3	3	0	0
indels	No evidence	chr10	51384388	G	GTTAAC	.	0/1	1	1	0	0	0	3	5	5	0	0
indels	No evidence	chr10	51384601	CTCCTT	C	.	0/1	1	1	0	0	0	3	6	6	0	0
indels	No evidence	chr10	51387179	TC	T	.	0/1	1	1	0	0	0	5	5	5	0	0
indels	No evidence	chr10	51387920	TAAAC	T	.	0/1	2	2	0	0	0	2	3	3	0	0
indels	No evidence	chr10	51388050	TC	T	.	0/1	1	2	0	0	0	5	3	3	0	0
indels	No evidence	chr10	51389032	ATT	A	.	0/1	3	3	0	0	0	0	2	2	0	0
indels	No evidence	chr10	51670352	A	AG	.	2018-01-01	0	0	0	0	0	0	0	0	5	5
indels	No evidence	chr10	51670706	TAC	T	.	0/1	0	0	0	0	0	0	0	0	4	6
indels	No evidence	chr10	51690616	CTTT	C	.	0/1	1	2	0	0	0	0	0	0	3	7
indels	No evidence	chr10	51693555	GCTA	G	.	2018-01-01	2	3	0	0	0	0	0	0	5	6
indels	No evidence	chr10	51702851	GACACACACAC	G	.	2018-01-01	1	3	0	0	0	0	5	5	1	1
indels	No evidence	chr10	51721126	CA	C	.	0/1	9	9	0	0	2	2	1	1	15	19
indels	No evidence	chr10	51721157	A	AAT	.	2018-01-01	8	9	0	0	0	0	1	1	19	20
indels	Yes	chr10	51721348	GTTTTTTTTTT	G	.	2018-01-01	6	10	0	0	0	0	0	0	13	13
indels	Yes	chr10	51721949	CTT	C	.	2018-01-01	6	11	0	0	0	0	0	0	14	16
indels	Yes	chr10	51721961	CTTTTT	C	.	2018-01-01	7	11	0	0	0	0	0	0	15	15
indels	Yes	chr10	51722653	CT	C	.	2018-01-01	9	17	1	1	0	0	0	0	15	22
indels	No evidence	chr10	51899444	AGCCTG	A	.	2018-01-01	0	0	0	0	0	0	7	7	0	0
indels	No evidence	chr10	51899453	A	AAG	.	2018-01-01	0	0	0	0	0	0	6	6	0	0
indels	No evidence	chr10	51899641	AAAAC	A	.	2018-01-01	0	0	0	0	0	1	3	3	0	0
indels	No evidence	chr10	51900934	A	AT	.	2018-01-01	0	0	0	0	0	0	15	15	0	0
indels	No evidence	chr10	51906319	G	GA	.	2018-01-01	0	0	0	0	0	0	9	9	1	1
indels	No evidence	chr10	51926275	T	TC	.	2018-01-01	1	1	0	0	0	0	2	2	1	1
indels	No evidence	chr10	51958042	AT	A	.	0/1	0	0	5	5	0	3	4	4	0	0
indels	No evidence	chr10	51958751	TACACAC	T	.	0/1	0	0	0	0	0	2	7	7	0	0
indels	No evidence	chr10	51966297	T	TACAC	.	2018-01-01	1	1	1	1	1	1	2	3	1	1
indels	No evidence	chr10	51971942	A	AACACACAC	.	0/1	3	3	0	0	0	0	8	8	2	2
indels	No evidence	chr10	51975873	C	CACCCCCTGACAGGCCCCAGTGTGTGATGTTCCCCTCCCTGTGTCCATGTGTTCTCATTGTTCAACTCCCACTTATGAGA	.	0/1	0	2	0	5	0	2	2	7	0	1
indels	No evidence	chr10	51977890	T	TA	.	2018-01-01	1	1	6	6	0	0	3	3	0	0
indels	No evidence	chr10	51981458	GGATA	G	2018-01-01	0/1	1	1	1	1	0	4	5	6	0	0
indels	No evidence	chr10	51981462	A	AGATAGATA	.	0/1	0	1	0	1	4	4	0	6	0	0
indels	No	chr10	52200035	AATAT	A	.	0/1	1	46	0	21	0	3	0	1	2	9
indels	Yes	chr10	52413487	A	AGT	.	0/1	31	41	11	23	13	15	0	7	4	8
indels	Yes	chr10	52457159	AGTGTGTGTGTGTGT	A	.	2018-01-01	12	35	6	11	0	12	6	6	0	1
indels	Yes	chr10	52467759	GGA	G	.	0/1	12	29	0	13	0	14	4	4	0	1
indels	Yes	chr10	52513916	T	TAC	.	2018-01-01	13	14	0	0	14	15	6	6	0	0
indels	Yes	chr10	52513926	C	CACAT	.	2018-01-01	11	14	0	0	13	17	7	7	0	0
indels	Yes	chr10	52518948	G	GAGACTCTTCCCCTATA	.	2018-01-01	17	17	0	0	1	1	2	2	0	0
indels	Yes	chr10	52654462	C	CATAT	.	2018-01-01	36	39	22	22	5	5	1	2	2	2
indels	Yes	chr10	52667881	A	AATATATAT	.	2018-01-01	41	41	14	14	6	6	15	15	5	6
indels	Yes	chr10	52822379	CT	C	.	0/1	17	40	1	31	1	3	1	9	2	14
indels	No	chr10	52853548	TTA	T	.	0/1	8	39	7	18	4	6	13	20	7	15
indels	No	chr10	52865621	G	GTTTATGTTTAA	.	0/1	0	42	0	20	4	4	0	29	3	5
indels	No	chr10	52873704	CGT	C	.	0/1	1	45	0	16	1	1	3	8	1	8
indels	No	chr10	52981882	G	GC	.	2018-01-01	8	46	8	24	4	5	7	8	13	15
indels	Yes	chr10	53093912	TTCTCTCTCTC	T	.	2018-01-01	39	44	20	23	5	5	8	9	4	4
indels	No evidence	chr10	53313458	TATACGTGTATATAATATATGTATATATTAG	T	.	2018-01-01	3	3	6	6	6	6	5	5	1	1
indels	Yes	chr10	533507	GTTT	G	.	0/1	14	36	1	15	2	4	0	4	2	5
indels	Yes	chr10	53659431	GTATA	G	.	2018-01-01	10	33	9	18	0	3	9	11	0	0
indels	Yes	chr10	53777802	AT	A	.	0/1	15	37	0	19	3	8	0	8	0	1
indels	Yes	chr10	53866465	A	AAATAAT	.	0/1	31	49	10	23	7	8	0	3	4	5
indels	Yes	chr10	53876924	C	CTGTGTGTG	.	2018-01-01	42	44	12	12	9	9	2	4	9	9
indels	No	chr10	53909030	G	GAA	.	0/1	3	54	0	20	0	3	0	7	4	15
indels	No	chr10	53909035	GTT	G	.	0/1	1	54	0	20	0	2	0	8	4	15
indels	Yes	chr10	5450976	CATAT	C	.	2018-01-01	12	35	11	20	1	4	7	9	9	14
indels	Yes	chr10	54566675	TTA	T	.	2018-01-01	22	37	9	20	3	11	8	11	1	1
indels	No	chr10	54570650	C	CT	.	0/1	5	35	0	26	3	18	3	16	0	2
indels	Yes	chr10	54588093	T	TACACACAC	.	0/1	34	37	9	15	2	8	10	10	6	7
indels	Yes	chr10	54810960	GCTCTCTCT	G	.	0/1	16	38	6	15	1	7	12	12	2	3
indels	Yes	chr10	55140944	TATATATATATATAA	T	1|0	2018-01-01	30	44	11	13	1	3	3	3	0	0
indels	Yes	chr10	55140948	TATATATATAA	T	0|1	2018-01-01	37	44	11	12	2	3	2	2	0	0
indels	Yes	chr10	55184398	GT	G	0/1	2018-01-01	18	36	11	22	0	15	5	8	3	4
indels	Yes	chr10	55373127	TTGTGTG	T	.	0/1	12	46	7	15	0	13	9	9	1	2
indels	Yes	chr10	55611431	AATATATATATATATATATATATAT	A	.	0/1	16	41	7	10	6	6	0	0	0	0
indels	Yes	chr10	55881762	T	TAC	0/1	2018-01-01	46	52	15	15	18	18	17	19	6	7
indels	Yes	chr10	55949685	A	ATG	.	2018-01-01	31	32	20	21	4	5	9	9	2	2
indels	Yes	chr10	5596904	CGTGT	C	.	0/1	12	40	15	28	13	14	1	11	3	7
indels	Yes	chr10	56073890	TAC	T	.	0/1	16	38	11	23	1	1	2	10	1	1
indels	Yes	chr10	56263024	T	TGTGA	.	2018-01-01	53	53	33	33	7	7	6	6	7	7
indels	Yes	chr10	5633880	CT	C	0|1	2018-01-01	43	46	25	25	7	7	9	9	2	2
indels	No	chr10	5642147	CTGTG	C	.	2018-01-01	11	53	19	31	1	7	7	8	2	2
indels	Yes	chr10	56557267	AACACACACAC	A	.	0/1	19	39	15	21	7	7	3	10	0	0
indels	Yes	chr10	56564687	T	TTATATATATATATATATATATATA	.	2018-01-01	31	31	21	21	4	4	6	6	2	2
indels	Yes	chr10	56613078	T	TATATAC	.	0/1	14	23	8	19	0	8	7	7	3	4
indels	Yes	chr10	56816289	ATT	A	0/1	2018-01-01	13	26	12	25	10	10	0	7	1	3
indels	Yes	chr10	56816292	TTC	T	0/1	2018-01-01	12	26	12	24	0	8	6	6	2	3
indels	Yes	chr10	56907411	CT	C	0/1	2018-01-01	20	31	12	18	9	12	1	5	0	0
indels	Yes	chr10	57073959	G	GTA	.	0/1	32	39	7	18	11	11	1	12	1	4
indels	Yes	chr10	57090598	A	ATG	.	2018-01-01	33	36	22	22	8	9	7	9	1	1
indels	Yes	chr10	57119480	G	GTATA	.	0/1	23	50	7	15	2	13	7	10	0	1
indels	Yes	chr10	57161354	C	CTGTG	.	2018-01-01	44	45	16	16	12	12	5	5	1	1
indels	Yes	chr10	57165043	G	GATATATATATATAT	.	0/1	30	48	13	26	3	3	0	8	0	1
indels	Yes	chr10	57191842	AACACACACACAC	A	.	0/1	15	33	13	19	11	12	0	9	0	0
indels	Yes	chr10	57191854	C	CACACACACACACACACAC	.	0/1	14	36	7	18	1	12	7	7	0	0
indels	Yes	chr10	57210715	CTATATATA	C	.	2018-01-01	13	41	14	24	0	5	6	6	0	0
indels	Yes	chr10	57303891	TATAC	T	.	0/1	30	39	8	11	5	6	7	7	2	2
indels	Yes	chr10	57303895	CATACATATATAT	C	.	2018-01-01	22	36	7	12	4	5	6	7	2	2
indels	Yes	chr10	57327604	GA	G	.	0/1	13	33	2	20	12	12	0	15	0	1
indels	No	chr10	57418563	C	CTTACAGAAGCCTTTAAATTAACTTTCAGATTTTAAAATTATCTTAAAGGCTTCTGTAAGTAG	.	0/1	1	46	0	24	3	7	0	9	1	3
indels	Yes	chr10	5749689	TCACACA	T	.	2018-01-01	27	48	14	16	11	12	5	6	1	1
indels	Yes	chr10	5757604	TG	T	0/1	2018-01-01	33	44	9	29	1	17	11	11	1	3
indels	Yes	chr10	5757606	GT	G	0/1	2018-01-01	28	44	23	30	14	15	0	12	1	3
indels	Yes	chr10	578482	T	TGA	.	0/1	18	30	5	21	0	19	23	23	2	5
indels	Yes	chr10	57913107	C	CATATAT	0/1	2018-01-01	27	28	23	23	10	10	9	10	0	0
indels	Yes	chr10	57976087	TG	T	1|0	2018-01-01	28	31	31	31	17	17	16	16	5	5
indels	Yes	chr10	58159409	GTGTATATATA	G	.	0/1	17	45	11	20	4	17	17	18	1	3
indels	No	chr10	58239061	CATAT	C	.	2018-01-01	7	35	4	10	5	7	1	4	1	1
indels	Yes	chr10	58240103	CAGAAAGAAAGAAAGAAAGAAAGAA	C	.	0/1	23	35	11	14	11	11	4	8	2	2
indels	Yes	chr10	58240278	AAGAAAGAAAGAAAGAAAGAG	A	.	0/1	18	37	4	11	0	9	6	7	0	4
indels	No	chr10	58240340	GGAAAGAAAGAAAGAAAGAAA	G	.	0/1	7	35	3	11	5	6	0	7	1	4
indels	Yes	chr10	58478371	GCACA	G	.	2018-01-01	32	52	23	23	12	14	9	9	2	3
indels	Yes	chr10	58528102	TTA	T	.	2018-01-01	24	38	15	15	6	9	3	3	1	1
indels	Yes	chr10	58584692	CTATATA	C	.	0/1	7	26	11	15	1	2	4	6	0	0
indels	Yes	chr10	58645672	T	TAA	.	2018-01-01	33	46	31	31	4	4	5	5	3	3
indels	Yes	chr10	59384512	TTGTGTGTGTG	T	.	0/1	15	45	6	13	0	20	10	10	0	2
indels	Yes	chr10	59426611	TG	T	.	0/1	28	41	20	28	12	14	0	11	2	2
indels	No	chr10	59518434	ATG	A	.	0/1	4	32	7	17	11	12	0	20	1	3
indels	Yes	chr10	59518436	G	GTG	.	0/1	23	32	10	17	1	12	19	20	1	3
indels	Yes	chr10	6024151	A	ATTTTTT	.	2018-01-01	41	44	21	21	8	8	8	8	0	0
indels	Yes	chr10	6031354	CTATT	C	.	2018-01-01	15	45	6	22	9	9	0	6	0	1
indels	No	chr10	6042922	C	CTGTGTGTGTG	CTGTGTGTGTGTG	.	2018-02-01	4	27	6	14	0	8	9	chr10	3	3
indels	Yes	chr10	60467762	A	ATTTTT	.	2018-01-01	32	35	18	18	13	13	8	9	16	18
indels	Yes	chr10	60576505	CTG	C	.	2018-01-01	15	41	10	13	5	6	9	13	3	3
indels	Yes	chr10	60624005	T	TA	.	2018-01-01	30	31	10	10	4	4	8	9	3	4
indels	Yes	chr10	6093780	C	CTATATATATA	.	2018-01-01	48	48	24	24	1	1	4	4	2	2
indels	Yes	chr10	60939602	TACAC	T	.	0/1	13	51	12	21	3	17	11	11	8	8
indels	No	chr10	61208589	T	TAGAA	.	0/1	0	45	0	37	2	14	3	14	0	1
indels	No evidence	chr10	61456768	GCCCCGTCCGGGAGGTGAGGGGCGCCTCTGCCTGGCCGCCCCTACTGGGAAGTGAGGAGCCCCTCTGCCCCGCCAGCCGCCCTGTCCGGGAGGGAGGTGGGGGGGTTCAGCCCCCCGCCCAGCCAGCCA	G	.	2018-01-01	8	8	4	5	3	3	1	1	0	0
indels	Yes	chr10	61481132	G	GGT	.	0/1	28	40	16	31	0	5	6	7	3	13
indels	Yes	chr10	61770589	AACACACACACACACAC	A	.	0/1	17	41	10	23	11	11	0	10	0	1
indels	Yes	chr10	61773835	GATATATATATATATATATATATAT	G	.	0/1	22	37	6	9	4	4	0	5	0	0
indels	Yes	chr10	61773849	TATATATATAT	T	.	0/1	25	33	8	8	3	3	3	4	0	0
indels	Yes	chr10	62048647	A	AAC	2018-01-01	0/1	28	28	24	24	2	3	4	4	7	12
indels	No	chr10	62142555	CTATATA	C	.	0/1	6	38	1	1	0	0	0	0	7	10
indels	Yes	chr10	62142557	ATATA	A	.	0/1	21	50	17	17	1	1	0	0	17	19
indels	Yes	chr10	62516663	G	GTATATATATA	.	2018-01-01	53	54	10	11	9	9	2	3	6	6
indels	Yes	chr10	62559359	C	CAG	.	2018-01-01	32	40	16	16	5	5	3	3	6	6
indels	No	chr10	62573146	T	TTTA	.	0/1	1	20	0	30	2	13	1	5	2	10
indels	No	chr10	62754762	TA	T	.	0/1	3	46	0	30	0	17	5	5	0	2
indels	No	chr10	62754769	G	GT	.	0/1	5	44	0	30	0	17	5	5	0	3
indels	Yes	chr10	62835380	C	CTG	.	2018-01-01	40	40	16	16	0	0	1	1	14	16
indels	Yes	chr10	62874404	C	CATTT	0/1	2018-01-01	17	35	8	14	0	0	1	1	7	8
indels	No	chr10	62942465	C	CT	.	0/1	5	35	0	22	0	7	2	2	3	22
indels	Yes	chr10	63077074	CATATAT	C	.	0/1	11	40	4	13	8	8	1	3	1	4
indels	Yes	chr10	6318801	T	TTGTG	.	2018-01-01	39	39	24	24	6	6	14	14	2	2
indels	No	chr10	63462985	GACAC	G	.	2018-01-01	10	40	8	16	5	6	5	8	1	1
indels	Yes	chr10	63470011	AGTGTGT	A	.	2018-01-01	15	34	7	8	18	19	6	7	1	1
indels	No	chr10	63484300	C	CTCCCATATCTAAGTTTTAGATATGGGAGTGTTT	.	0/1	0	39	0	25	2	12	3	17	0	4
indels	Yes	chr10	6349473	TTTCCTTCC	T	.	2018-01-01	21	40	9	22	5	5	0	6	0	1
indels	Yes	chr10	63532278	A	AAGAG	.	2018-01-01	34	35	28	28	13	14	8	8	5	5
indels	Yes	chr10	63591055	GGT	G	.	2018-01-01	14	41	11	13	10	10	7	11	1	2
indels	Yes	chr10	63925178	CT	C	2018-01-01	0/1	27	38	17	23	8	10	3	14	2	4
indels	No	chr10	63933643	C	CA	.	0/1	11	46	0	22	4	8	2	18	0	1
indels	No	chr10	64133909	G	GA	.	0/1	2	41	0	31	1	12	0	9	2	4
indels	Yes	chr10	64296430	GC	G	0/1	2018-01-01	14	33	10	26	1	16	13	13	2	3
indels	Yes	chr10	64376236	G	GCCTT	.	2018-01-01	36	37	10	10	5	8	7	8	2	2
indels	Yes	chr10	64407678	CACAT	C	0|1	2018-01-01	35	40	15	16	8	8	14	15	19	19
indels	No	chr10	64426805	TCTA	T	.	0/1	0	41	0	17	0	12	2	2	3	11
indels	No	chr10	64426811	C	CGG	.	0/1	1	43	2	18	0	11	2	3	2	12
indels	No	chr10	64426816	CTTTAA	C	.	0/1	0	43	1	20	0	11	3	3	2	11
indels	No	chr10	64426823	C	CCGT	.	0/1	0	34	1	20	0	10	2	3	2	9
indels	No	chr10	64426827	ATT	A	.	0/1	1	43	0	22	0	10	3	3	2	9
indels	No	chr10	64426831	T	TAAAAA	.	0/1	1	43	2	23	1	13	2	3	2	9
indels	No evidence	chr10	64649314	T	TGAAA	.	2018-01-01	2	3	5	6	0	0	1	1	1	2
indels	No	chr10	64702326	A	AAAAGG	.	0/1	1	40	0	37	0	12	4	5	3	23
indels	No	chr10	64702337	ATCCTT	A	.	0/1	0	41	0	35	0	13	4	5	3	24
indels	Yes	chr10	64837197	TA	T	0/1	2018-01-01	22	33	11	25	8	8	2	4	1	1
indels	Yes	chr10	65065272	CCTCT	C	.	2018-01-01	19	39	9	22	0	3	9	9	4	5
indels	Yes	chr10	65243992	GGATGGATAGATAGATAGATA	G	0|1	2018-01-01	29	32	17	18	16	16	6	6	2	4
indels	Yes	chr10	65316376	TTTTTTTTTTGTTGTTTTG	T	.	0/1	23	32	16	20	15	18	4	9	0	5
indels	Yes	chr10	65316382	T	TTG	.	0/1	17	31	10	20	5	15	9	10	1	5
indels	No	chr10	65686410	CTG	C	.	0/1	2	48	0	23	2	17	2	5	0	4
indels	Yes	chr10	65849324	TACACACACAC	T	.	0/1	16	44	6	13	3	4	0	0	2	6
indels	Yes	chr10	65874223	G	GGTGT	.	2018-01-01	31	33	14	14	5	5	8	8	10	10
indels	No	chr10	65892891	C	CACA	.	0/1	1	27	0	22	1	16	0	5	6	19
indels	No	chr10	65892896	ATTG	A	.	0/1	0	43	0	22	1	16	0	4	6	21
indels	No	chr10	66036761	AACACAC	A	.	0/1	9	38	11	23	0	8	8	8	3	6
indels	Yes	chr10	66098238	C	CAGAG	.	2018-01-01	37	38	15	15	4	4	7	7	11	12
indels	No	chr10	6610626	ATTTTTT	A	.	0/1	0	33	0	21	1	14	3	11	0	1
indels	Yes	chr10	66649882	TC	T	.	0/1	29	29	22	22	3	3	4	4	13	13
indels	Yes	chr10	6670634	CTATATATATATATATATATATA	C	.	2018-01-01	11	22	7	18	3	3	0	3	1	1
indels	Yes	chr10	66972497	G	GAGAAAGAAAGAAAGAA	.	2018-01-01	15	40	14	26	0	7	8	8	1	2
indels	Yes	chr10	66996750	CAA	C	1|0	2018-01-01	21	36	8	18	2	9	9	10	0	0
indels	Yes	chr10	67028929	CATAT	C	.	0/1	18	32	11	15	1	1	3	5	4	5
indels	Yes	chr10	67029636	GT	G	.	0/1	23	37	5	17	0	9	7	7	3	4
indels	Yes	chr10	67029638	AG	A	.	0/1	23	37	5	17	0	9	7	7	3	4
indels	No evidence	chr10	67032455	GT	G	.	2018-01-01	0	0	1	7	0	1	3	3	1	1
indels	No evidence	chr10	67032457	AG	A	.	2018-01-01	0	0	1	7	0	1	3	3	1	1
indels	Yes	chr10	67114679	T	TCACA	.	2018-01-01	32	32	18	18	5	5	14	14	6	6
indels	Yes	chr10	67319254	TA	T	.	0/1	18	38	0	18	0	16	4	11	1	6
indels	Yes	chr10	6737709	A	ATGTGTG	.	0/1	36	38	25	25	19	20	6	9	4	6
indels	Yes	chr10	67450950	CTA	C	.	2018-01-01	20	38	18	19	7	10	13	17	1	1
indels	Yes	chr10	67985148	AATAT	A	.	2018-01-01	31	49	18	19	11	15	9	9	2	2
indels	Yes	chr10	68069664	AAAAT	A	.	2018-01-01	52	55	8	8	6	6	1	2	0	0
indels	Yes	chr10	68120354	CTTCTTTCT	C	.	0/1	9	26	4	14	4	6	0	4	0	3
indels	Yes	chr10	68140358	CCTATCTAT	C	0/1	2018-01-01	23	40	15	15	10	10	8	11	0	0
indels	Yes	chr10	68140379	CTATCTATA	C	0/1	2018-01-01	20	41	18	20	9	12	11	12	0	1
indels	Yes	chr10	68303665	GTGTGTATATATATA	G	.	0/1	12	38	10	15	6	6	1	4	0	0
indels	No	chr10	6835080	TAC	T	.	0/1	10	47	5	21	0	0	0	0	6	17
indels	Yes	chr10	68357269	C	CATATAT	.	2018-01-01	16	23	1	4	4	5	0	2	1	1
indels	Yes	chr10	68428180	A	ATATG	.	2018-01-01	39	47	26	27	8	10	14	16	1	2
indels	Yes	chr10	68445075	GTATGTGTGTATA	G	.	0/1	13	42	5	18	0	8	4	5	0	6
indels	Yes	chr10	68445081	GTGTATA	G	.	0/1	28	32	17	18	8	8	4	5	1	6
indels	Yes	chr10	68455674	A	AG	.	2018-01-01	17	37	18	19	3	3	8	8	0	0
indels	Yes	chr10	68812071	ACTCTCT	A	.	0/1	10	38	8	11	9	9	0	2	0	0
indels	Yes	chr10	69058943	TC	T	.	0/1	12	42	0	19	3	7	1	2	3	17
indels	No	chr10	69289493	A	AGGAAATTCATGACAAATAGGGCATACTTGCTGGATTTGTCATGAATTTCCTATT	.	0/1	0	34	0	23	0	1	1	1	3	14
indels	Yes	chr10	69325801	G	GTATATATATATATATATATATA	.	2018-01-01	33	34	8	8	1	1	3	3	9	9
indels	No	chr10	69383572	TTTA	T	.	0/1	0	32	0	24	0	5	0	0	3	15
indels	Yes	chr10	69406904	TTA	T	.	2018-01-01	12	43	13	13	0	0	1	3	12	18
indels	No	chr10	69494904	AAC	A	.	0/1	3	53	0	21	1	10	0	0	10	30
indels	Yes	chr10	69706105	AACACACACACAC	A	.	0/1	12	38	7	15	0	2	7	7	6	10
indels	Yes	chr10	70003423	G	GAGAAAGAAAGAAAGAAAGAA	.	2018-01-01	35	37	21	21	6	6	8	8	5	5
indels	Yes	chr10	70090466	CGTGTGTGTGTGTGTGT	C	.	0/1	19	48	10	27	2	2	0	2	1	13
indels	Yes	chr10	70136246	T	TATATATATATTC	.	2018-01-01	36	36	18	18	4	4	0	0	7	8
indels	No	chr10	70208689	GGT	G	.	0/1	3	39	1	16	1	2	0	1	3	16
indels	Yes	chr10	70314899	CA	C	.	0/1	11	25	4	22	2	11	11	16	6	9
indels	Yes	chr10	70398522	TTGTGTGTG	T	.	0/1	9	31	11	24	0	14	19	20	0	0
indels	Yes	chr10	7052671	T	TTGTG	.	2018-01-01	23	45	8	13	4	4	0	5	1	1
indels	Yes	chr10	70605875	TTTATTATTA	T	0|1	2018-01-01	16	33	13	25	9	9	0	5	3	5
indels	Yes	chr10	7062810	G	GTATA	.	2018-01-01	41	41	20	20	4	4	8	9	1	1
indels	Yes	chr10	70634324	TAAAAACCCTTGCTTCCCGGGAGGCGGAGCTTGCAGTGAGTCGAGATCCCGCCACTGCACTCCAGCCTGGGCGACAGAGCGAGACTCCGTCTCAAAAAAAAAAAAAAAAAAAA	T	.	0/1	11	26	11	21	0	9	5	5	1	2
indels	Yes	chr10	71256076	CAAT	C	.	2018-01-01	13	15	13	13	6	6	2	2	2	2
indels	Yes	chr10	71339042	G	GACACAC	.	2018-01-01	27	29	15	15	9	9	8	9	1	1
indels	Yes	chr10	71349299	AGTGTGTGT	A	.	0/1	13	39	12	23	10	11	0	13	1	4
indels	Yes	chr10	7177935	TTCTC	T	.	0/1	13	40	4	24	7	8	0	6	0	7
indels	Yes	chr10	71839321	G	GCA	.	2018-01-01	25	25	23	23	3	3	9	10	10	10
indels	Yes	chr10	71943266	GGAAGGAAA	G	0|1	2018-01-01	48	48	16	16	18	18	8	8	4	4
indels	Yes	chr10	72153228	CTTTTTTTTTTTTTTTTT	C	.	2018-01-01	25	29	14	15	9	9	4	4	1	1
indels	Yes	chr10	72161155	T	TAATAATAATAATA	0/1	2018-01-01	40	48	27	33	4	6	9	9	4	4
indels	Yes	chr10	72161159	A	AATAAT	0/1	2018-01-01	46	49	30	33	7	7	8	10	4	4
indels	Yes	chr10	72267506	CGTGTGTGTGTGTGT	C	.	0/1	15	35	8	19	0	16	9	10	1	8
indels	Yes	chr10	72267516	TGTGT	T	.	0/1	25	37	20	20	17	17	5	8	4	8
indels	Yes	chr10	72426131	A	AAATAAT	.	2018-01-01	35	35	18	18	2	2	4	4	2	2
indels	Yes	chr10	72479123	TACACACACACACAC	T	.	0/1	12	29	6	13	11	12	0	6	1	3
indels	No	chr10	72573670	TCA	T	.	0/1	2	29	7	16	7	7	0	8	3	5
indels	Yes	chr10	72720705	T	TAG	2018-01-01	0/1	32	32	22	22	86	89	75	77	33	34
indels	Yes	chr10	72720910	T	TGA	2018-01-01	0/1	39	39	15	15	44	44	63	67	17	18
indels	Yes	chr10	72851438	CAA	C	.	0/1	10	31	13	26	21	21	0	6	0	1
indels	Yes	chr10	73008622	TCTCACACA	T	.	2018-01-01	13	25	20	25	15	16	11	12	1	2
indels	No	chr10	73163083	CCTTTCTTTCTTTCTTTCTTT	C	.	0/1	6	29	2	11	0	2	3	3	0	1
indels	Yes	chr10	73344299	C	CTGTGTGTGTGTGTGTGTG	.	2018-01-01	46	46	24	24	14	14	14	14	11	12
indels	Yes	chr10	73594976	A	AAAAT	.	2018-01-01	16	34	6	13	0	3	9	9	3	3
indels	Yes	chr10	738072	T	TATATA	.	0/1	26	28	16	22	1	2	2	2	1	1
indels	Yes	chr10	74163387	T	TTGTGTG	.	2018-01-01	29	30	15	15	8	8	3	3	10	10
indels	Yes	chr10	74264906	AT	A	.	0/1	17	33	3	27	0	5	1	2	5	25
indels	No	chr10	74365176	C	CCT	.	0/1	6	47	0	32	1	13	0	0	6	24
indels	Yes	chr10	74406979	TG	T	2018-01-01	0/1	33	35	42	42	14	14	2	2	15	15
indels	No	chr10	74438581	GTC	G	.	0/1	5	43	0	30	0	10	0	0	6	16
indels	Yes	chr10	74540269	A	AGTGTGTGTGTGT	.	2018-01-01	48	48	24	25	4	5	1	1	21	22
indels	Yes	chr10	74592692	A	ATGTGTGTGTGTGTGTGTGTGTG	.	2018-01-01	41	42	21	21	3	3	3	3	39	39
indels	No	chr10	74900480	A	ACC	.	0/1	1	37	4	29	0	2	2	4	4	19
indels	Yes	chr10	75076245	G	GAT	.	2018-01-01	47	48	17	17	1	1	1	1	23	24
indels	Yes	chr10	75195775	ATGTGTGTG	A	.	0/1	10	34	10	25	1	3	1	1	5	16
indels	Yes	chr10	75443110	C	CAAA	.	0/1	10	18	1	1	13	13	1	8	2	3
indels	Yes	chr10	7558208	TTG	T	.	2018-01-01	26	51	15	18	7	7	4	4	1	2
indels	Yes	chr10	75699188	C	CGTGTGTGT	.	0/1	30	36	7	19	0	11	18	18	3	7
indels	Yes	chr10	75722603	AT	A	.	2018-01-01	26	35	25	25	4	4	4	4	2	4
indels	No	chr10	75751878	AGT	A	.	0/1	2	38	0	10	2	4	3	14	2	9
indels	Yes	chr10	75874192	T	TGC	.	0/1	40	43	19	19	15	15	12	13	27	27
indels	Yes	chr10	75944259	TTGTGTG	T	.	2018-01-01	11	33	7	7	0	2	7	7	9	12
indels	Yes	chr10	76124445	GGTGTGTGTGTGTGTGTGT	G	.	2018-01-01	20	29	16	19	1	1	2	2	13	13
indels	No	chr10	76378770	TTGTG	T	.	2018-01-01	6	41	6	17	8	8	0	4	3	9
indels	Yes	chr10	76425494	T	TGA	.	0/1	26	33	5	12	0	6	4	4	0	2
indels	No	chr10	76625552	GGCATGAGCCACT	G	.	0/1	0	37	0	38	0	4	5	5	18	35
indels	Yes	chr10	76776617	CT	C	.	2018-01-01	33	47	14	28	5	11	9	13	9	11
indels	Yes	chr10	77033659	ATTT	A	.	0/1	13	36	2	24	2	5	1	7	0	2
indels	Yes	chr10	7720987	G	GCACA	.	2018-01-01	37	40	23	23	11	13	7	7	3	3
indels	Yes	chr10	77469179	C	CGT	.	0/1	27	49	2	21	3	4	0	6	7	28
indels	No	chr10	77554182	T	TGGTCGCCG	.	0/1	0	52	0	24	4	4	0	12	0	9
indels	No	chr10	77554189	TTCTCTTGG	T	.	0/1	0	53	1	22	4	4	0	13	0	9
indels	No	chr10	77559438	TTG	T	.	2018-01-01	11	44	14	15	8	12	6	6	1	2
indels	Yes	chr10	78278038	CATCT	C	.	2018-01-01	9	27	10	18	3	3	1	4	2	2
indels	Yes	chr10	78303074	CTGTGTGTGTGTGTGTGTG	C	.	0/1	19	40	5	16	0	15	12	13	1	2
indels	No	chr10	78303663	G	GC	.	0/1	6	41	0	27	2	4	3	19	1	2
indels	Yes	chr10	78339959	T	TACAC	.	2018-01-01	49	51	9	9	7	7	5	6	3	3
indels	No	chr10	78354861	T	TGAGTAGCTGGGCCTGGGCATGGTGGCACGCCCTGTAGTCCCAGCTACTCAGGAGGCTGAGGCAGAC	.	0/1	0	39	0	28	1	11	3	7	0	8
indels	Yes	chr10	78566451	TGTGC	T	1|0	2018-01-01	30	48	9	17	22	22	16	28	2	3
indels	Yes	chr10	78566453	TGC	T	0|1	2018-01-01	36	48	17	17	22	22	28	29	3	3
indels	No	chr10	78767411	GTA	G	.	0/1	5	31	14	30	0	6	9	10	3	4
indels	Yes	chr10	78767413	A	ATATATATATA	.	0/1	15	31	15	29	6	6	1	10	1	4
indels	Yes	chr10	78828610	AACACACACACACACAC	A	.	0/1	28	43	6	16	11	11	0	7	2	5
indels	Yes	chr10	78886829	AACACACACACACACACACACAC	A	.	0/1	19	33	14	23	6	6	0	7	1	2
indels	No	chr10	7890736	CT	C	.	0/1	1	34	0	23	0	31	7	7	2	14
indels	No	chr10	7890744	T	TA	.	0/1	0	34	0	24	0	31	6	6	3	15
indels	No	chr10	78931158	CGTGT	C	.	0/1	7	30	8	19	7	8	0	6	2	4
indels	No	chr10	78958326	GATAT	G	.	2018-01-01	5	24	8	21	0	7	9	12	1	3
indels	No	chr10	79259161	GTA	G	.	0/1	1	42	0	23	0	7	2	4	3	20
indels	Yes	chr10	79332365	T	TATA	.	0/1	20	34	2	18	0	5	2	2	0	3
indels	Yes	chr10	79429062	A	AACAC	.	2018-01-01	25	25	17	17	9	11	10	10	7	7
indels	Yes	chr10	79509123	C	CGTGTGTGTGTGTGTGTGTGT	.	2018-01-01	42	43	30	30	11	11	9	9	6	6
indels	No	chr10	79728579	T	TG	.	0/1	4	33	3	28	5	19	4	6	5	16
indels	No	chr10	79787893	C	CAAGAGATTTTCAACAGGAGAGTATCTTGATAAGAGTTCTCCTTCTGGAAAATCTCTTGATTCATGGTGGA	.	0/1	0	37	0	16	4	14	1	9	0	6
indels	No	chr10	79888625	ATG	A	.	0/1	2	39	0	20	1	5	1	9	4	14
indels	No	chr10	79933263	C	CAAGTG	.	2018-01-01	1	27	0	26	4	17	2	20	1	9
indels	Yes	chr10	80112227	C	CATATATATAT	.	2018-01-01	42	42	19	19	2	2	4	4	3	4
indels	Yes	chr10	80518951	GAGAA	G	.	2018-01-01	22	27	15	16	1	1	4	5	2	2
indels	Yes	chr10	80519085	A	AAAAGAAAG	.	2018-01-01	17	21	11	14	0	0	6	6	1	1
indels	No	chr10	80589289	TTG	T	.	2018-01-01	2	42	5	15	13	14	0	19	1	4
indels	No	chr10	80613679	GCC	G	.	2018-01-01	3	34	0	21	3	28	4	16	0	2
indels	Yes	chr10	80935340	CGTGTGT	C	.	0/1	7	26	14	22	3	3	1	16	3	7
indels	Yes	chr10	81077552	C	CGTGTGT	.	2018-01-01	36	41	8	9	4	4	14	14	5	5
indels	No	chr10	81085585	GTGTCTCCA	G	.	0/1	0	32	0	28	4	42	6	22	7	38
indels	No	chr10	81149285	AGTGT	A	.	0/1	6	31	10	25	0	4	3	3	0	2
indels	No	chr10	81205950	CGT	C	.	0/1	1	28	0	18	2	9	0	10	1	7
indels	Yes	chr10	81233990	A	AAG	.	2018-01-01	40	41	25	25	6	6	5	5	6	6
indels	Yes	chr10	81243064	A	AGT	0/1	2018-01-01	37	37	24	24	7	9	8	8	0	0
indels	Yes	chr10	81288357	ACTT	A	.	0/1	7	17	8	17	0	5	12	12	1	3
indels	Yes	chr10	81340852	CAAGAAAGA	C	.	0/1	19	40	6	19	1	14	18	18	1	2
indels	Yes	chr10	81340856	AAAGA	A	.	0/1	31	40	17	18	13	15	13	19	2	2
indels	Yes	chr10	81349334	T	TAGAA	.	0/1	16	27	13	23	21	21	0	18	2	2
indels	Yes	chr10	81349337	C	CTAGCT	.	0/1	15	28	13	22	18	18	0	18	2	2
indels	Yes	chr10	81429419	T	TACAA	.	0/1	15	42	4	12	0	12	13	13	0	0
indels	Yes	chr10	81433110	GA	G	.	0/1	28	39	0	3	0	13	7	7	0	0
indels	No	chr10	81435513	TTG	T	.	0/1	3	33	18	26	9	14	0	6	3	5
indels	Yes	chr10	81437005	A	AC	.	0/1	12	31	2	13	1	12	13	13	0	1
indels	Yes	chr10	81439690	AATCT	A	.	0/1	21	53	5	14	0	17	14	14	0	0
indels	Yes	chr10	81483412	TAA	T	.	0/1	6	15	0	11	1	5	0	0	1	3
indels	Yes	chr10	81518102	TGCAGTGA	T	.	0/1	12	24	0	12	0	9	3	3	1	6
indels	Yes	chr10	81520408	A	AC	.	0/1	8	21	0	16	0	18	12	12	0	5
indels	Yes	chr10	81520409	A	AAACAAAC	.	0/1	9	21	0	15	0	18	13	13	0	5
indels	Yes	chr10	81533310	AT	A	.	0/1	10	17	1	16	0	22	7	7	0	1
indels	Yes	chr10	81562382	A	ATTTATTATTTTTT	.	2018-01-01	18	18	19	20	4	5	9	9	1	2
indels	Yes	chr10	81565259	T	TTCTA	.	2018-01-01	32	32	2	2	3	3	7	7	0	0
indels	Yes	chr10	81570841	T	TACCA	.	2018-01-01	18	21	7	7	6	6	3	3	0	0
indels	Yes	chr10	81574758	C	CT	.	2018-01-01	15	22	1	1	6	6	5	6	0	0
indels	Yes	chr10	81576366	T	TAGG	.	2018-01-01	19	19	0	0	9	9	5	5	0	0
indels	Yes	chr10	81587551	GT	G	.	2018-01-01	20	24	19	22	9	13	10	14	2	2
indels	Yes	chr10	81591774	TGAGA	T	.	2018-01-01	26	33	19	23	20	20	13	13	4	4
indels	Yes	chr10	81634373	G	GGGGT	.	0/1	11	25	0	10	0	7	8	8	0	2
indels	Yes	chr10	81948267	A	ATATATATATATG	.	2018-01-01	40	41	13	13	2	2	6	6	7	7
indels	Yes	chr10	81990184	CA	C	.	0/1	16	23	25	28	5	9	8	8	3	3
indels	Yes	chr10	82086165	ATTTTTTTTTT	A	.	2018-01-01	24	43	8	20	1	7	8	8	1	1
indels	Yes	chr10	822152	CTTCT	C	.	0/1	11	24	3	9	0	0	4	4	3	9
indels	Yes	chr10	82464270	T	TCA	.	0/1	47	50	13	25	12	12	1	7	1	1
indels	No	chr10	8249658	T	TTGGCCTCCCAAAGTGATGGGATACAGGCTGGGCACGGTGGCTCATGCCTGTAATCCCAGCACTTTGGGAGGCCAAGATGGGCAGATCATGAGGTCAAGAGATCGAGACCATCC	.	0/1	0	34	0	30	5	14	0	13	0	2
indels	Yes	chr10	82581952	GA	G	.	0/1	15	32	10	23	13	13	1	19	2	2
indels	No	chr10	82890226	C	CT	.	2018-01-01	6	48	12	18	6	9	0	2	4	4
indels	Yes	chr10	82956527	TACACACACACACAC	T	.	0/1	21	38	4	16	9	9	0	11	0	2
indels	Yes	chr10	83216740	ATGTG	A	2018-01-01	0/1	22	44	15	23	2	10	22	22	2	4
indels	Yes	chr10	83216742	GTG	G	.	0/1	24	44	21	21	12	12	21	21	3	4
indels	Yes	chr10	83302981	C	CTATA	.	2018-01-01	30	31	19	19	2	2	4	4	2	2
indels	Yes	chr10	83315549	CT	C	.	0/1	17	37	6	20	10	10	0	12	1	2
indels	No	chr10	83695632	AAC	A	.	2018-01-01	4	40	6	22	0	1	5	8	8	15
indels	Yes	chr10	8372369	GGTGTGTGTGT	G	.	2018-01-01	11	39	6	15	5	6	0	11	1	3
indels	Yes	chr10	83763744	AACACACAC	A	.	0/1	16	42	10	21	0	7	7	7	5	9
indels	Yes	chr10	83869291	TTGTGTG	T	.	0/1	7	27	9	19	0	10	8	8	0	0
indels	No evidence	chr10	840050	GCAATGTCAGTCCTACCCAATGTCGGTCCTACGCAATGTCGGTCCTACC	G	.	2018-01-01	3	9	0	1	1	1	1	1	0	0
indels	Yes	chr10	84050394	AT	A	.	2018-01-01	32	36	16	18	9	9	16	17	4	4
indels	Yes	chr10	84061442	C	CTATATATATATATA	.	0/1	52	52	19	19	6	6	4	4	0	0
indels	Yes	chr10	84122089	ATGTGTGTGTGTG	A	.	0/1	18	46	6	15	0	6	5	5	0	1
indels	No	chr10	84277363	GTC	G	.	0/1	1	32	0	25	0	4	3	5	2	15
indels	Yes	chr10	84480566	CATATATATAT	C	.	2018-01-01	13	25	12	25	5	6	0	7	0	0
indels	Yes	chr10	84480570	T	TAC	.	0/1	16	26	10	27	0	7	6	7	0	0
indels	Yes	chr10	84521678	CTCTT	C	.	0/1	20	44	6	12	3	5	1	6	0	2
indels	Yes	chr10	84521682	T	TTCTT	.	0/1	24	46	7	11	2	5	5	5	2	2
indels	Yes	chr10	8469866	GATATATATATATATATATAT	G	.	0/1	17	29	6	14	0	2	2	3	1	1
indels	Yes	chr10	84925934	ATT	A	.	0/1	15	43	2	25	3	5	0	15	3	3
indels	Yes	chr10	84952106	CTT	C	.	0/1	15	40	15	28	6	10	1	16	0	2
indels	Yes	chr10	85068133	C	CTCTCTCTATA	.	2018-01-01	51	51	21	21	3	3	6	6	10	10
indels	Yes	chr10	85157514	A	ACT	2018-01-01	0/1	49	49	19	19	1	2	8	8	17	20
indels	Yes	chr10	85208452	AC	A	2018-01-01	0/1	35	40	18	18	5	5	2	2	24	25
indels	Yes	chr10	85566404	C	CCACACACACACA	.	0/1	25	36	11	22	0	12	11	11	0	1
indels	Yes	chr10	85624078	GAGAA	G	.	2018-01-01	22	36	6	7	5	6	4	4	2	2
indels	Yes	chr10	8567521	GAAGAAAGA	G	.	2018-01-01	9	27	7	13	0	3	4	5	2	2
indels	Yes	chr10	8588804	CGAGAGAGAGAGAGAGAGAGA	C	.	2018-01-01	22	32	17	18	1	2	3	3	3	3
indels	No	chr10	86069177	A	AG	.	0/1	1	35	0	26	0	0	0	10	4	13
indels	Yes	chr10	86155941	C	CTG	2018-01-01	0/1	40	43	27	27	5	5	10	10	15	20
indels	No	chr10	86244246	CGT	C	.	0/1	1	57	0	26	1	3	2	3	3	10
indels	Yes	chr10	86493801	G	GCTCTCT	.	2018-01-01	42	42	22	22	7	7	7	7	5	5
indels	Yes	chr10	86515897	T	TACACAC	.	2018-01-01	38	38	24	24	6	6	6	6	6	7
indels	No	chr10	86561734	T	TTTTGCTC	.	0/1	1	48	0	37	0	2	0	23	3	9
indels	Yes	chr10	87103280	GTGTT	G	0/1	2018-01-01	29	29	18	19	4	5	4	4	0	0
indels	No	chr10	87604177	TACAC	T	.	2018-01-01	12	53	6	16	10	10	3	15	2	2
indels	Yes	chr10	87625712	GGAGAGAGA	G	.	0/1	15	45	10	13	1	3	8	8	0	2
indels	Yes	chr10	8770107	C	CTG	.	2018-01-01	40	42	18	19	5	6	8	8	6	7
indels	No	chr10	87847098	TTG	T	0/1	2018-01-01	6	29	16	18	12	15	13	16	11	15
indels	Yes	chr10	88084569	CT	C	.	0/1	13	31	1	25	0	0	0	0	6	27
indels	No	chr10	88094938	C	CCCTGGCTGGCTGCAAAT	.	0/1	0	41	0	23	0	0	0	0	4	25
indels	No	chr10	88354664	TA	T	.	0/1	1	26	0	26	0	1	0	5	2	5
indels	Yes	chr10	88447807	C	CGTGTGT	.	2018-01-01	26	26	14	14	10	10	13	14	7	7
indels	Yes	chr10	88496503	TCACA	T	0/1	2018-01-01	12	23	19	23	4	7	9	9	3	6
indels	No	chr10	8850996	T	TAGTCAATTGTAAATACATGCATATAGTTATGCATAATTTCTTTACAATTGACTACATATAAAGTACATGC	.	0/1	0	49	0	23	0	1	1	7	2	11
indels	Yes	chr10	88709651	G	GATA	.	0/1	19	19	11	11	9	9	1	1	2	3
indels	Yes	chr10	88726907	CGTGT	C	.	2018-01-01	17	29	16	19	7	8	6	7	0	0
indels	Yes	chr10	88735065	T	TTATA	.	0/1	22	30	11	32	9	9	1	11	0	3
indels	Yes	chr10	88904373	ATTTTTTTTTTT	A	.	0/1	19	34	10	25	10	10	0	12	1	2
indels	Yes	chr10	88905457	C	CTT	.	0/1	17	30	2	9	10	11	0	13	1	1
indels	Yes	chr10	88905459	G	GTTCATCC	.	0/1	18	31	2	9	10	10	0	12	1	1
indels	Yes	chr10	88908322	GC	G	.	0/1	12	27	10	23	16	16	1	10	1	1
indels	Yes	chr10	88959803	T	TA	0/1	2018-01-01	6	23	12	23	4	10	15	17	4	5
indels	Yes	chr10	88974681	CT	C	.	2018-01-01	34	45	23	23	5	6	5	7	6	7
indels	Yes	chr10	88982810	AG	A	.	2018-01-01	12	13	24	24	6	6	6	6	4	4
indels	Yes	chr10	88984556	CT	C	.	2018-01-01	10	11	7	7	3	3	1	1	0	0
indels	No evidence	chr10	88993041	GTC	G	.	0/1	3	5	2	3	11	11	0	32	2	2
indels	Yes	chr10	88995793	C	CT	.	0/1	5	11	0	5	0	8	7	8	0	0
indels	Yes	chr10	88997451	CTTTTTTT	C	.	2018-01-01	6	13	10	18	7	7	0	4	0	1
indels	No evidence	chr10	89014608	CCA	C	.	2018-01-01	5	7	3	3	12	12	14	15	0	0
indels	No evidence	chr10	89014647	CTTTTTT	C	.	0/1	4	8	4	6	13	13	0	10	1	3
indels	No evidence	chr10	89014927	A	AT	0/1	2018-01-01	6	9	11	12	11	13	4	4	1	1
indels	Yes	chr10	89016833	T	TTAA	.	0/1	4	10	0	11	4	4	0	14	0	0
indels	No evidence	chr10	89017700	TTGG	T	.	0/1	6	6	2	2	6	6	1	2	0	0
indels	Yes	chr10	89017701	TG	T	.	0/1	13	13	15	15	5	5	13	13	0	0
indels	Yes	chr10	89018398	AATTTT	A	.	0/1	6	16	5	13	8	8	0	10	0	1
indels	No evidence	chr10	89032800	C	CA	.	0/1	0	4	0	33	7	7	1	13	0	1
indels	No evidence	chr10	89054705	A	AT	.	0/1	0	1	0	0	2	12	7	11	0	0
indels	No evidence	chr10	89057657	G	GTCTC	.	0/1	2	2	0	3	0	13	4	4	0	2
indels	Yes	chr10	89066948	AT	A	.	0/1	4	15	0	2	0	18	12	12	0	0
indels	No evidence	chr10	89115922	C	CAG	.	0/1	3	9	0	8	0	12	7	7	0	3
indels	Yes	chr10	89126833	GC	G	.	2018-01-01	16	16	1	1	4	4	4	4	0	1
indels	No	chr10	89141679	CTTTTTTTTTTTTT	C	.	0/1	11	118	4	13	0	7	6	7	0	3
indels	Yes	chr10	89157531	TTAGATAGATAGA	T	.	0/1	15	27	6	16	0	10	10	10	1	2
indels	No evidence	chr10	89195733	C	CA	.	0/1	4	9	1	19	0	11	3	3	0	2
indels	No evidence	chr10	89217017	TC	T	.	2018-01-01	0	2	0	0	1	6	8	8	0	0
indels	No evidence	chr10	89217019	TC	T	.	2018-01-01	0	2	0	0	1	6	9	9	0	0
indels	No evidence	chr10	89223278	C	CA	.	2018-01-01	0	3	0	0	1	1	5	7	0	0
indels	Yes	chr10	89343590	A	AATATATAT	.	2018-01-01	42	42	19	19	8	8	7	7	1	1
indels	Yes	chr10	89428415	A	ATGTG	.	2018-01-01	42	60	8	20	17	18	0	3	1	1
indels	No	chr10	8967678	AAT	A	.	0/1	8	41	8	22	10	10	0	9	1	1
indels	No	chr10	89836392	C	CATGACACTGATAGAAACCTCCTTAAGGTTTCTATCAGTGTCATGATTTTACATTATAGGCCCTCTGCACCCCTGAAGTTGAAAGCAGAGAGAAGGGTTATTGGGAGCAGAGGGCCTATAATGTAAAATT	.	0/1	0	33	0	27	1	14	4	16	1	6
indels	Yes	chr10	9000449	T	TACACAC	.	2018-01-01	35	36	21	21	8	8	5	5	2	2
indels	No	chr10	90089843	TATATAA	T	.	2018-01-01	4	22	6	7	1	1	2	3	5	7
indels	Yes	chr10	9044415	A	AGTGTGTGT	.	2018-01-01	38	44	19	19	6	6	12	12	3	3
indels	Yes	chr10	9062987	T	TAC	TACACACAC	.	2018-02-01	11	30	7	20	7	10	0	chr10	0	0
indels	No	chr10	90642240	T	TTC	.	0/1	4	41	0	25	1	11	4	17	0	5
indels	Yes	chr10	90801647	GTCTCTCTCTCTCTCTCTCTCTC	G	.	0/1	20	56	6	23	12	13	0	15	1	2
indels	Yes	chr10	90913755	A	ATG	.	2018-01-01	34	38	28	28	12	14	10	10	1	1
indels	Yes	chr10	9097761	TTATATATATATATATATATATATA	T	1|0	2018-01-01	27	47	6	17	0	1	8	8	0	0
indels	Yes	chr10	91008199	ATATTTATTTATTTATTTATTTATTTAT	A	.	2018-01-01	29	38	11	17	0	2	8	8	1	2
indels	No	chr10	91021120	GGTTT	G	.	0/1	0	42	0	28	1	18	4	8	0	1
indels	Yes	chr10	9113959	A	AGTGTGT	.	2018-01-01	43	44	18	18	13	13	11	11	4	4
indels	Yes	chr10	91154334	AATATATATATATATAT	A	.	2018-01-01	16	43	6	12	0	1	5	5	0	3
indels	No	chr10	91247721	GTA	G	.	2018-01-01	3	46	7	13	4	4	1	3	1	1
indels	Yes	chr10	9149074	C	CCA	.	0/1	32	38	10	12	9	11	3	16	3	4
indels	Yes	chr10	91516797	G	GTGTATA	.	0/1	35	35	16	17	8	11	15	16	2	3
indels	No	chr10	9159831	T	TATAG	.	0/1	1	26	0	21	2	6	2	19	1	2
indels	Yes	chr10	91616218	AT	A	.	0/1	16	40	1	25	2	8	5	13	0	6
indels	Yes	chr10	91750237	TTTTC	T	.	0/1	15	31	6	12	4	5	0	1	0	1
indels	Yes	chr10	9175411	T	TTGTGTGTGTG	.	2018-01-01	35	36	20	20	11	11	7	7	4	4
indels	No	chr10	91832979	TG	T	.	0/1	5	38	2	22	4	15	0	17	4	8
indels	Yes	chr10	9195189	CTTCT	C	.	0/1	25	39	14	21	1	8	6	6	0	1
indels	No	chr10	92193523	CTG	C	.	2018-01-01	6	30	15	15	5	6	11	13	17	17
indels	Yes	chr10	92285369	C	CCT	.	0/1	38	42	15	29	2	11	5	5	0	4
indels	No	chr10	92350679	C	CA	.	0/1	5	41	15	29	17	18	1	16	2	7
indels	No	chr10	92372016	CA	C	.	0/1	7	35	2	25	0	14	0	5	5	9
indels	Yes	chr10	92694480	T	TGATA	0/1	2018-01-01	36	36	14	15	9	9	4	4	13	13
indels	Yes	chr10	92695033	GGATAGATA	G	.	2018-01-01	22	42	13	24	1	3	5	5	6	9
indels	No	chr10	92869306	A	AAAATGGTTTTAGAAATGGATTTTCTAATTTTCTTCAATGAATATGCATTACTTATGAAATTAAAAATCCATTTCTAAAACCATTTTGTAGCACTT	.	0/1	0	42	0	28	0	9	3	8	2	15
indels	Yes	chr10	93009128	GTATATATATATATATA	G	.	2018-01-01	37	42	15	15	6	6	4	4	2	2
indels	Yes	chr10	93162297	G	GCA	.	0/1	43	59	6	16	5	5	0	6	5	8
indels	Yes	chr10	93333014	G	GAA	.	0/1	34	39	11	11	4	5	3	3	3	3
indels	No	chr10	93368959	TCA	T	0|1	2018-01-01	8	48	14	17	8	13	3	8	3	4
indels	Yes	chr10	93386001	T	TTG	.	2018-01-01	39	40	21	21	11	12	8	9	6	6
indels	Yes	chr10	93646213	T	TTTTATTTA	.	2018-01-01	40	42	29	29	5	5	3	3	2	2
indels	No	chr10	93864301	G	GT	.	0/1	0	27	1	36	0	6	3	10	0	3
indels	Yes	chr10	94066965	TGTGTGC	T	1|0	2018-01-01	13	32	13	29	14	14	9	15	4	5
indels	No	chr10	94111658	CGT	C	.	0/1	3	46	11	26	0	3	7	7	0	2
indels	Yes	chr10	94111660	T	TGTGT	.	0/1	36	47	13	25	3	3	0	7	2	2
indels	Yes	chr10	94199284	CTATA	C	.	0/1	15	46	9	16	6	6	7	11	2	3
indels	No evidence	chr10	9438231	A	AAGCAGGTGCAACTATGAGTGGAG	.	2018-01-01	3	3	11	11	1	1	2	2	8	8
indels	Yes	chr10	94485076	T	TTGTGTGTG	.	2018-01-01	48	48	25	25	14	14	15	15	0	0
indels	Yes	chr10	94528397	G	GGAGAGAGA	.	2018-01-01	38	38	27	27	13	13	9	9	0	0
indels	Yes	chr10	94622088	C	CCA	.	2018-01-01	31	34	32	32	8	8	25	25	21	22
indels	No	chr10	94864240	CATAT	C	.	0/1	10	40	10	22	0	13	5	6	0	0
indels	Yes	chr10	94935950	T	TGTGCGCGCGCGCGCGCGCTC	.	2018-01-01	30	31	29	30	11	11	16	16	0	0
indels	Yes	chr10	95039580	T	TAC	0/1	2018-01-01	33	34	21	21	10	10	9	9	1	1
indels	Yes	chr10	95039581	A	AC	0/1	2018-01-01	32	35	20	21	10	11	9	9	1	1
indels	Yes	chr10	95188323	A	AAC	.	0/1	25	37	7	13	0	6	5	6	3	3
indels	Yes	chr10	95201754	A	AACAC	.	0/1	20	31	9	16	9	11	0	6	3	5
indels	Yes	chr10	95590993	G	GTC	2018-01-01	0/1	36	40	12	12	5	5	3	5	69	100
indels	Yes	chr10	95729739	TTCTCCC	T	.	0/1	12	35	4	24	2	5	0	0	1	8
indels	Yes	chr10	95926336	GGTGT	G	.	0/1	13	37	9	20	8	8	0	3	2	3
indels	Yes	chr10	95967271	CGTGTGT	C	.	0/1	17	37	7	9	4	6	9	9	2	3
indels	Yes	chr10	95967273	TGTGT	T	.	0/1	25	43	16	16	10	11	10	10	3	4
indels	Yes	chr10	95980133	TTATATATATA	T	.	2018-01-01	14	39	11	21	6	6	0	4	1	3
indels	Yes	chr10	95994819	T	TCACACACA	.	2018-01-01	45	50	13	13	6	6	21	21	5	6
indels	No	chr10	96072871	CA	C	.	0/1	1	34	1	31	3	10	3	14	3	12
indels	No	chr10	96072876	G	GT	.	0/1	0	34	0	31	3	10	3	15	3	12
indels	No	chr10	96102310	TACACAC	T	.	0/1	4	31	0	14	3	4	0	7	0	6
indels	No evidence	chr10	96218808	ACTGATTGGTCCATTTTACAGAGAG	A	.	2018-01-01	1	2	6	6	3	3	6	6	2	2
indels	Yes	chr10	96335511	TGG	T	.	0/1	33	45	13	21	10	13	1	23	3	11
indels	Yes	chr10	96335528	TTGTGTGTG	T	.	0/1	12	47	1	14	1	7	11	11	0	10
indels	Yes	chr10	9663164	CCTCT	C	.	0/1	13	50	7	19	1	6	5	6	0	6
indels	Yes	chr10	96767445	TTA	T	.	0/1	13	47	13	16	12	14	0	7	0	1
indels	No evidence	chr10	9696980	A	ACATTTATTTATATATAAATGTGTATTAAATATG	.	0/1	8	9	9	18	0	2	4	4	0	2
indels	Yes	chr10	97124930	A	ATGTGTGTG	.	2018-01-01	39	39	22	22	9	9	12	12	5	6
indels	Yes	chr10	97243982	CA	C	.	0/1	12	31	9	25	10	11	1	22	2	4
indels	Yes	chr10	97989410	C	CTGTG	.	2018-01-01	26	29	31	31	14	15	14	14	2	3
indels	No	chr10	98244347	TACAC	T	.	0/1	7	29	1	18	2	2	3	8	1	5
indels	No	chr10	98244349	CAC	C	.	0/1	7	28	20	20	2	2	7	8	5	5
indels	Yes	chr10	98278604	G	GATAAA	0/1	2018-01-01	51	52	31	31	21	21	14	14	1	1
indels	Yes	chr10	98278606	T	TAAA	0/1	2018-01-01	50	50	31	31	21	21	12	13	1	1
indels	Yes	chr10	98303101	C	CTTTTTTTTTTT	.	2018-01-01	33	35	22	22	9	10	9	9	4	4
indels	Yes	chr10	98357028	TTTCCTTCC	T	.	0/1	16	41	4	16	0	10	12	14	0	2
indels	Yes	chr10	98400884	G	GCGCA	.	2018-01-01	25	25	28	28	11	11	14	14	5	5
indels	Yes	chr10	98441770	TAG	T	.	2018-01-01	17	43	18	18	7	8	13	15	3	3
indels	No	chr10	98487827	CTGTGTG	C	.	0/1	13	53	9	17	1	7	16	16	2	6
indels	No	chr10	98771832	TAC	T	.	2018-01-01	6	37	9	11	2	3	1	1	8	10
indels	Yes	chr10	98796805	TTG	T	.	2018-01-01	9	34	13	17	2	4	2	3	5	6
indels	Yes	chr10	98943775	C	CCACA	.	0/1	19	36	8	15	0	4	11	13	4	4
indels	Yes	chr10	98946024	TACACACACAC	T	.	0/1	18	46	10	24	6	7	1	13	1	7
indels	Yes	chr10	99071833	TAC	T	.	2018-01-01	26	39	15	18	6	6	9	11	4	4
indels	Yes	chr10	99157780	G	GTA	0/1	2018-01-01	27	39	13	20	3	4	0	4	3	3
indels	Yes	chr10	99164900	AT	A	.	0/1	24	50	2	28	1	2	4	10	2	7
indels	Yes	chr10	99284041	T	TG	.	0/1	11	36	7	22	0	24	25	26	3	5
indels	Yes	chr10	9958724	T	TAA	.	0/1	18	35	10	26	1	11	11	14	0	0
indels	Yes	chr10	99600005	A	AAGAGAG	.	2018-01-01	33	33	17	17	5	5	5	5	3	3
indels	Yes	chr10	99602364	TA	T	.	0/1	14	25	0	19	1	4	2	7	3	3
indels	No	chr10	99617119	GACAC	G	.	0/1	13	52	10	20	3	9	9	11	3	6
indels	Yes	chr10	99617121	CAC	C	.	0/1	13	51	17	20	7	8	8	8	5	6
indels	Yes	chr10	99764838	C	CAT	.	2018-01-01	38	38	19	19	8	11	5	5	9	10
indels	Yes	chr10	99802772	G	GT	GTT	.	2018-02-01	15	41	7	20	0	16	9	chr10	3	8
indels	No	chr1	100029392	G	GGTTGGACTTGTTTACAGTCCCACCAACA	.	0/1	1	58	0	22	0	9	0	1	6	22
indels	Yes	chr1	100264311	GTTTTT	G	.	2018-01-01	40	47	21	22	10	10	11	15	11	11
indels	Yes	chr1	100288467	TCCTCTACCTCCTCTTCCTCTA	T	0/1	2018-01-01	24	32	17	21	8	12	8	8	3	5
indels	Yes	chr1	100419106	TTA	T	.	2018-01-01	10	26	20	22	5	7	4	5	0	0
indels	Yes	chr1	100706922	TTGTGTG	T	.	2018-01-01	10	29	8	11	2	2	0	0	6	8
indels	Yes	chr1	100727704	T	TTA	2018-01-01	0/1	40	41	22	22	7	7	0	0	12	16
indels	Yes	chr1	100817529	A	AGT	.	2018-01-01	27	27	29	29	2	2	0	0	22	23
indels	No	chr1	100942922	T	TGG	.	0/1	0	32	1	32	0	0	0	7	5	20
indels	No	chr1	100942926	TCC	T	.	0/1	0	32	0	31	0	0	0	7	5	20
indels	No	chr1	101180263	G	GA	.	0/1	2	60	0	26	4	4	0	19	0	1
indels	No	chr1	101180268	CT	C	.	0/1	1	59	0	26	4	4	0	20	0	1
indels	Yes	chr1	101212063	G	GAGAA	2018-01-01	0/1	44	48	18	19	2	3	8	8	3	3
indels	Yes	chr1	101330729	AAGAGAGAGAG	A	.	2018-01-01	15	36	9	11	6	6	3	5	1	10
indels	Yes	chr1	101380749	TTTTC	T	.	2018-01-01	14	24	6	15	3	5	0	0	3	6
indels	Yes	chr1	10142690	CTT	C	.	0/1	20	38	1	23	3	6	0	7	6	15
indels	Yes	chr1	101516126	G	GGTGTGT	.	0/1	35	39	17	18	10	11	1	2	5	7
indels	No	chr1	10162034	GGT	G	.	0/1	3	46	0	25	0	5	3	6	1	12
indels	Yes	chr1	101680730	CG	C	.	2018-01-01	30	34	26	26	9	9	13	13	9	9
indels	Yes	chr1	101685371	T	TTG	.	2018-01-01	44	46	19	19	8	8	3	6	6	6
indels	Yes	chr1	101881927	G	GTATATATATATATATATATATA	.	2018-01-01	47	47	13	13	8	8	12	12	1	1
indels	Yes	chr1	101896940	CCACACA	C	.	2018-01-01	17	46	18	18	5	6	7	7	2	2
indels	Yes	chr1	101987187	C	CGT	.	2018-01-01	39	39	21	21	7	12	5	5	0	0
indels	Yes	chr1	102180344	T	TACACAC	.	2018-01-01	35	35	23	23	4	4	7	8	21	21
indels	Yes	chr1	102293565	G	GCT	.	2018-01-01	26	44	13	24	1	12	12	15	85	93
indels	Yes	chr1	10248315	T	TAA	0/1	2018-01-01	11	37	12	24	0	1	4	4	0	0
indels	Yes	chr1	102483586	G	GA	.	0/1	48	51	27	27	2	2	4	4	14	14
indels	Yes	chr1	102637135	T	TTATATATA	.	2018-01-01	33	34	21	21	2	2	3	4	7	7
indels	Yes	chr1	10275196	TTATATATATATATA	T	.	2018-01-01	18	25	10	23	6	6	1	6	0	0
indels	Yes	chr1	102813946	CTGTGTG	C	2018-01-01	0/1	15	37	12	13	8	8	0	1	5	5
indels	Yes	chr1	102813948	GTGTG	G	.	0/1	33	54	22	23	8	8	5	6	7	7
indels	Yes	chr1	102841361	A	ATGTGTGTGTGTG	.	2018-01-01	34	37	19	19	3	3	8	8	0	0
indels	Yes	chr1	102959369	TTGTGTG	T	.	0/1	12	42	2	15	2	10	14	14	1	2
indels	Yes	chr1	102959373	GTG	G	.	0/1	22	47	15	16	7	9	14	14	1	1
indels	No evidence	chr1	103049014	GTATATATACATATATATGTGTATA	G	0/1	2018-01-01	3	9	7	7	4	5	2	2	0	0
indels	No	chr1	103049204	TATATAC	T	.	0/1	5	25	8	19	7	9	3	8	0	1
indels	Yes	chr1	103049248	CTGTG	C	.	0/1	16	53	7	23	0	7	7	8	2	3
indels	Yes	chr1	103049252	G	GTGTG	.	0/1	27	52	16	23	7	7	0	7	1	3
indels	Yes	chr1	103107095	CTTTTT	C	.	2018-01-01	42	45	14	14	8	9	7	7	2	2
indels	No	chr1	103188960	ATC	A	.	0/1	10	43	3	20	4	5	1	10	3	6
indels	No	chr1	103254024	AAC	A	.	2018-01-01	4	27	6	17	0	7	7	8	1	2
indels	Yes	chr1	103426042	GT	G	.	2018-01-01	24	38	23	25	11	13	12	13	3	4
indels	No	chr1	103486491	T	TTC	.	0/1	2	28	1	20	2	2	0	8	0	1
indels	No	chr1	103486496	GGA	G	.	0/1	1	28	0	20	2	2	0	8	0	1
indels	Yes	chr1	103501878	GTATATA	G	.	2018-01-01	17	35	11	11	0	0	2	2	8	8
indels	Yes	chr1	103565022	G	GAT	.	0/1	26	47	1	27	0	4	3	3	4	15
indels	Yes	chr1	103650433	GAC	G	.	2018-01-01	16	61	15	15	3	3	2	2	13	16
indels	No	chr1	103741397	AAG	A	.	0/1	0	27	0	20	0	0	1	6	3	19
indels	No evidence	chr1	103934123	AT	A	.	0/1	1	2	0	0	1	11	6	8	1	2
indels	No evidence	chr1	103936966	AT	A	.	0/1	0	1	0	0	0	5	4	5	0	0
indels	No evidence	chr1	103936978	G	GAA	.	2018-01-01	1	1	0	0	5	5	7	7	0	0
indels	No evidence	chr1	103969360	GGT	G	.	0/1	0	0	0	0	1	6	5	6	0	0
indels	No evidence	chr1	103974135	G	GA	.	0/1	0	0	0	0	2	5	6	6	0	0
indels	No evidence	chr1	103974289	T	TCAC	.	0/1	0	0	0	0	0	7	7	7	0	0
indels	No evidence	chr1	103974938	T	TAC	.	0/1	0	0	0	0	10	12	0	4	0	0
indels	No evidence	chr1	103978825	CA	C	.	0/1	0	0	0	0	2	8	2	2	0	1
indels	No evidence	chr1	103980249	TTA	T	.	0/1	0	0	0	0	2	11	7	8	0	0
indels	No evidence	chr1	103980666	T	TA	.	0/1	0	0	0	0	1	7	5	6	0	0
indels	No evidence	chr1	103983376	CT	C	.	0/1	0	0	0	0	0	5	5	5	0	1
indels	No evidence	chr1	103992287	ATTAT	A	.	0/1	0	0	0	0	0	9	6	6	0	0
indels	No evidence	chr1	103997509	CGTAT	C	.	0/1	2	8	0	0	13	13	1	9	0	0
indels	Yes	chr1	103998726	AT	A	.	0/1	6	10	0	0	0	9	7	7	0	0
indels	Yes	chr1	104000881	TTG	T	.	0/1	5	18	0	0	0	15	7	8	1	3
indels	Yes	chr1	104029943	AG	A	.	2018-01-01	35	36	14	15	3	4	4	7	6	11
indels	No evidence	chr1	104160	A	AACACACAC	.	2018-01-01	0	0	7	8	13	13	2	3	1	1
indels	Yes	chr1	104595373	GTATATATATATATATATATATATA	G	.	0/1	17	31	7	11	0	3	0	0	9	10
indels	Yes	chr1	104802438	GTGTGTGTGTGTT	G	1|0	2018-01-01	21	37	13	18	1	5	8	8	1	1
indels	Yes	chr1	104802442	GTGTGTGTT	G	0|1	2018-01-01	31	41	27	27	8	9	8	8	1	1
indels	Yes	chr1	105133740	A	AACACACACACACACAC	.	2018-01-01	32	33	32	32	12	12	8	8	0	0
indels	Yes	chr1	105155325	GTA	G	0|1	2018-01-01	16	36	19	20	6	6	7	10	3	3
indels	Yes	chr1	105171667	CATATAT	C	.	2018-01-01	38	45	18	18	4	4	12	12	0	0
indels	Yes	chr1	105243697	GTATATATATATA	G	.	2018-01-01	14	43	8	18	0	2	7	7	0	1
indels	No	chr1	105397963	CGT	C	.	0/1	2	33	0	21	1	3	0	0	4	17
indels	Yes	chr1	105509643	C	CAATATTCAATTG	.	2018-01-01	30	31	23	23	10	10	18	18	20	20
indels	Yes	chr1	105576409	TTA	T	.	0/1	8	26	12	22	1	17	10	10	9	10
indels	Yes	chr1	105576410	T	AT	.	0/1	15	26	10	21	15	17	0	10	2	10
indels	Yes	chr1	105692984	CTGTGTGTGTGTG	C	.	0/1	19	33	5	15	2	2	0	4	1	2
indels	Yes	chr1	105798924	ATGTGTG	A	.	0/1	11	32	8	16	1	14	16	17	3	5
indels	Yes	chr1	105844963	T	TTG	.	2018-01-01	32	34	16	16	7	7	15	17	3	3
indels	Yes	chr1	105890597	G	GCA	0/1	2018-01-01	34	38	16	16	9	11	11	11	3	6
indels	Yes	chr1	105912499	TACACACACACACAC	T	.	0/1	15	22	6	15	6	6	0	7	0	2
indels	Yes	chr1	106009299	AACAC	A	.	0/1	13	48	7	21	0	9	8	8	0	1
indels	No evidence	chr1	10616	CCGCCGTTGCAAAGGCGCGCCG	C	.	2018-01-01	1	3	1	3	0	0	0	0	6	6
indels	Yes	chr1	106268454	GA	G	.	0/1	20	41	11	30	0	14	13	13	4	6
indels	Yes	chr1	106311761	GATGATTATACATGATATTATATATCATATAATCATCT	G	.	0/1	13	39	7	13	0	4	13	15	0	1
indels	Yes	chr1	106350124	C	CAGAGAG	.	2018-01-01	33	34	9	9	9	9	13	13	7	7
indels	Yes	chr1	106406217	ATGTGTGTGTG	A	.	0/1	18	42	8	17	0	4	2	2	1	2
indels	No	chr1	106509115	C	CT	.	0/1	6	38	0	23	0	3	8	9	9	24
indels	Yes	chr1	106969035	A	AAAAG	.	2018-01-01	30	39	26	26	14	15	8	8	17	17
indels	Yes	chr1	106988163	CGT	C	.	2018-01-01	12	45	5	6	1	1	8	9	5	7
indels	Yes	chr1	107019198	TTATATA	T	.	0/1	12	31	8	15	0	3	1	1	4	5
indels	Yes	chr1	107493089	GGTGTGTGTGTGT	G	.	2018-01-01	23	39	2	14	1	8	11	11	0	0
indels	No	chr1	107770323	TAC	T	.	0/1	3	47	0	34	2	8	1	11	0	0
indels	Yes	chr1	107822656	G	GGTGT	0/1	2018-01-01	20	29	8	21	7	8	0	5	2	3
indels	Yes	chr1	107862487	T	TTTTA	.	2018-01-01	38	45	31	35	6	7	13	14	3	3
indels	No	chr1	107936656	AAC	A	.	0/1	3	37	0	26	0	10	1	5	2	2
indels	Yes	chr1	10818386	T	TCTCTC	.	0/1	28	44	18	30	12	12	0	17	0	4
indels	No	chr1	108356589	AGT	A	.	2018-01-01	10	48	18	19	9	10	7	8	4	6
indels	Yes	chr1	108427027	TTTATTATTATTATTA	T	.	0/1	29	45	9	17	10	10	1	4	1	1
indels	Yes	chr1	108431754	A	AGTGT	.	2018-01-01	48	49	21	21	7	7	12	14	4	4
indels	Yes	chr1	108451442	AACACAC	A	.	2018-01-01	15	30	16	18	3	5	10	11	6	6
indels	Yes	chr1	108561255	CATAT	C	.	0/1	11	43	8	22	8	9	0	19	1	2
indels	Yes	chr1	108577672	G	GCACACA	.	2018-01-01	52	53	17	17	6	6	12	12	1	1
indels	Yes	chr1	108730544	T	TTATATATATATATA	.	0/1	26	38	6	20	0	10	9	9	0	1
indels	Yes	chr1	108910572	TTATATATATATATATATATATATATATATATATATA	T	1|0	2018-01-01	11	28	8	15	3	3	0	4	3	5
indels	No evidence	chr1	108933476	G	GA	.	2018-01-01	1	2	0	0	1	1	1	3	0	0
indels	No evidence	chr1	108943885	AAGAT	A	.	2018-01-01	1	2	0	0	3	4	1	1	1	2
indels	No evidence	chr1	108955047	TATAAA	T	.	0/1	0	0	0	0	5	5	1	4	0	2
indels	No evidence	chr1	108955149	TTTTTAA	T	.	0/1	0	0	0	0	0	0	5	5	2	6
indels	No evidence	chr1	108964124	TGTGAGTTGAGGTGCCAGAC	T	.	0/1	0	3	0	0	3	5	1	1	0	2
indels	No evidence	chr1	108969068	T	TAAATAAAC	0/1	2018-01-01	1	2	2	2	3	3	5	6	3	5
indels	No evidence	chr1	108970832	CT	C	.	2018-01-01	2	2	0	0	3	4	4	5	2	2
indels	No evidence	chr1	108977214	CA	C	.	0/1	4	6	0	0	0	2	2	3	0	0
indels	No evidence	chr1	108978457	C	CCCA	.	0/1	3	3	1	1	1	1	4	4	1	1
indels	No evidence	chr1	108981155	TGATACCAAA	T	2018-01-01	0/1	2	5	2	2	0	11	6	6	0	3
indels	No evidence	chr1	108992038	CTATATA	C	.	2018-01-01	2	4	0	0	5	5	0	0	0	0
indels	No evidence	chr1	108998660	G	GGAAAGAAAGAAAAAGAAA	.	2018-01-01	1	3	0	0	3	3	0	2	3	3
indels	Yes	chr1	109033437	CGGAGAG	C	.	2018-01-01	35	37	11	11	4	4	0	0	7	7
indels	No	chr1	109187681	C	CCTGACAGGAAGTCAGGGA	.	0/1	0	43	0	21	0	5	0	3	3	12
indels	Yes	chr1	109198470	T	TACAC	.	0/1	36	47	11	23	0	10	9	9	2	5
indels	Yes	chr1	109218520	TG	T	.	2018-01-01	20	21	12	18	3	5	3	3	2	4
indels	No	chr1	109262367	TGAGAGA	T	.	0/1	10	41	8	16	7	7	1	7	1	3
indels	Yes	chr1	109399162	G	GA	.	0/1	21	42	12	22	7	7	0	8	0	1
indels	No	chr1	109399340	TCA	T	.	0/1	5	44	3	18	7	14	0	20	0	0
indels	No	chr1	109509389	AACACAC	A	.	0/1	6	33	8	19	0	9	14	14	0	1
indels	No evidence	chr1	109575	C	CGTGT	.	0/1	0	0	0	0	19	20	0	1	4	6
indels	Yes	chr1	109689694	A	ATT	.	2018-01-01	24	40	29	30	8	8	7	8	0	0
indels	Yes	chr1	109761884	C	CATATATATAT	.	2018-01-01	38	40	9	9	11	11	2	2	0	0
indels	Yes	chr1	109761910	T	TATATATATATGGAG	.	2018-01-01	38	43	9	15	10	11	1	3	0	0
indels	No	chr1	109761957	CTATA	C	.	0/1	7	41	6	14	1	10	6	6	0	2
indels	Yes	chr1	109761961	A	ATATA	.	0/1	26	41	8	13	9	10	0	6	2	2
indels	Yes	chr1	109921321	GATATATATATATATATATAT	G	.	2018-01-01	28	59	6	14	0	2	3	3	1	2
indels	No	chr11	100032562	TAC	T	.	0/1	2	39	2	15	1	1	0	5	7	16
indels	Yes	chr11	100074531	T	TACACACACAC	.	2018-01-01	35	36	17	17	10	10	9	9	12	12
indels	Yes	chr11	100212884	G	GACACACACAC	.	2018-01-01	22	42	14	29	0	5	15	15	4	5
indels	No	chr11	100254969	TGGGAG	T	.	0/1	0	32	0	27	2	3	1	10	0	7
indels	Yes	chr11	100328604	TAATA	T	0/1	2018-01-01	20	30	9	13	5	5	1	2	0	0
indels	No	chr11	100448499	GTCTCTC	G	.	0/1	7	36	1	10	4	6	1	7	0	8
indels	Yes	chr11	100476801	G	GAAAAAAAA	.	2018-01-01	44	46	25	25	14	14	13	13	6	6
indels	Yes	chr11	100482524	TTATATATATATATATATATATATATATATA	T	.	0/1	19	32	9	10	0	1	8	8	3	3
indels	Yes	chr1	110052992	TACACACACACAC	T	.	0/1	20	36	10	21	0	4	5	5	3	6
indels	Yes	chr11	100550081	G	GTATATA	.	0/1	33	33	17	17	4	5	7	7	7	7
indels	Yes	chr11	100599445	GTATATATATA	G	.	2018-01-01	16	41	8	19	2	3	0	4	3	4
indels	Yes	chr11	100728817	G	GGTGTGT	.	2018-01-01	36	38	19	19	3	3	6	6	11	12
indels	Yes	chr11	10077071	TACACACACAC	T	.	2018-01-01	30	47	13	14	5	5	6	9	2	2
indels	No	chr11	100826825	G	GC	.	0/1	2	39	0	22	1	17	6	24	0	7
indels	No	chr11	100826833	AG	A	.	0/1	2	39	0	21	1	14	6	25	0	7
indels	Yes	chr11	101173125	A	ATTTT	.	2018-01-01	32	38	19	20	9	9	9	9	2	2
indels	Yes	chr11	101276043	TTATATATATATATATA	T	.	0/1	27	50	12	24	6	6	0	4	1	1
indels	Yes	chr11	101276055	ATATA	A	.	0/1	29	48	8	19	4	4	3	4	0	0
indels	No	chr11	101330218	A	AAAATACTAAACAGTTTATTTTAATCATAGCTTAAAACAAACTGTTTAGTATTTTAG	.	0/1	0	59	0	27	3	9	1	7	0	3
indels	Yes	chr11	101355326	ATGTGTGTGTG	A	.	0/1	24	50	5	16	9	11	0	18	1	2
indels	Yes	chr11	101557282	C	CGTGTGTGTGTGTGTGT	.	2018-01-01	44	44	19	19	9	9	14	14	1	1
indels	Yes	chr11	101759855	T	TAAGA	.	2018-01-01	30	37	12	12	6	7	3	3	0	0
indels	No	chr11	101787759	ATG	A	.	2018-01-01	10	47	15	16	5	9	8	8	1	2
indels	Yes	chr11	101804545	A	AC	0/1	2018-01-01	9	34	7	16	7	7	4	6	3	3
indels	Yes	chr11	10279628	T	TACACAC	.	0/1	34	35	36	36	16	16	15	15	1	1
indels	No	chr11	102818396	TTG	T	.	0/1	3	28	7	21	0	10	11	13	2	4
indels	Yes	chr11	102848415	A	ATGTGTGTGTGTGTGTGTG	.	2018-01-01	47	47	19	19	11	11	1	1	17	17
indels	Yes	chr11	102848449	G	GTGTGTGTGTGTGT	.	0/1	49	51	15	20	7	12	0	5	12	14
indels	Yes	chr11	10287040	CGG	C	.	0/1	26	40	7	20	5	8	0	7	1	2
indels	Yes	chr1	110301766	AGTGT	A	.	0/1	10	31	4	13	0	4	9	9	3	5
indels	No	chr11	103324343	CAT	C	.	0/1	2	31	14	27	0	8	11	12	0	2
indels	Yes	chr11	103422327	AGTGTGTGT	A	.	0/1	15	44	11	19	10	10	1	5	3	3
indels	Yes	chr11	103458262	TACACACAC	T	.	0/1	24	60	10	19	6	7	0	15	5	7
indels	Yes	chr11	103458264	C	CACAA	.	0/1	26	61	11	26	0	14	17	18	1	7
indels	Yes	chr11	103646393	AACACACAC	A	.	0/1	15	45	17	17	1	1	3	4	10	15
indels	Yes	chr11	103646395	CACACAC	C	.	0/1	16	31	17	17	1	1	3	3	10	12
indels	No	chr11	103722868	A	ACTTGTTGATCTACTTAAAGACAGAGATGATGTTTTGCAAAATAATCATTTAGTTCTATAAGTAGATCAACAAGTCATAAATG	.	0/1	0	30	0	32	1	16	4	12	3	23
indels	Yes	chr11	1039994	CGGCCAGCCCCTTCCCTGCCCCTT	C	1|0	2018-01-01	18	30	11	26	7	7	3	8	2	3
indels	Yes	chr11	104241110	CTATGTATATGTATATGTA	C	.	2018-01-01	29	55	11	19	0	0	3	3	1	1
indels	Yes	chr11	104486669	CTTTCTTTTCT	C	.	0/1	13	26	6	15	5	7	0	3	0	0
indels	No	chr11	104547639	GGT	G	0/1	2018-01-01	7	49	9	19	2	8	4	5	1	4
indels	Yes	chr11	104650479	AC	A	.	0/1	28	51	10	15	1	20	7	8	2	2
indels	Yes	chr1	11048112	G	GAGGA	.	2018-01-01	25	26	23	23	2	2	2	2	5	5
indels	No	chr11	105015099	GATATAT	G	.	0/1	0	35	0	6	2	3	0	3	1	2
indels	Yes	chr11	105042419	GGAGAGAGAGA	G	.	0/1	17	37	9	18	0	4	8	8	3	4
indels	No	chr11	105071135	TTATATA	T	.	0/1	4	20	3	7	4	4	2	6	0	1
indels	Yes	chr11	105167224	G	GC	.	2018-01-01	27	45	30	30	8	8	4	4	5	5
indels	Yes	chr11	105231062	CATATAT	C	.	2018-01-01	13	32	7	16	0	5	7	8	1	2
indels	Yes	chr11	105353616	AATATATATATATATATAT	A	.	0/1	19	46	8	10	0	7	8	8	0	0
indels	Yes	chr11	105654470	T	TTGTGTGTGTG	.	2018-01-01	43	47	26	27	11	15	12	13	3	4
indels	Yes	chr11	10578247	C	CCCTT	.	2018-01-01	30	32	18	18	4	4	6	6	2	2
indels	No	chr11	105792032	GGT	G	.	2018-01-01	3	42	9	23	0	12	11	16	5	10
indels	Yes	chr11	105871028	AATATATATAT	A	.	2018-01-01	17	47	1	3	2	2	2	2	0	0
indels	Yes	chr11	10606095	AATAT	A	.	2018-01-01	12	32	18	18	4	5	6	6	1	1
indels	No	chr11	106186682	CGTGT	C	.	0/1	7	32	10	20	0	13	10	11	0	0
indels	Yes	chr11	106202443	T	TCTTTCCTTTC	.	2018-01-01	36	37	22	22	11	11	12	13	1	1
indels	Yes	chr11	106276365	CT	C	.	0/1	18	45	1	17	5	10	2	13	0	1
indels	Yes	chr11	106277599	CGTGTGTGTGT	C	.	0/1	18	50	9	22	4	4	0	12	0	3
indels	Yes	chr11	106277603	TGTGTGT	T	.	0/1	18	43	9	13	4	4	5	7	1	3
indels	Yes	chr11	10644423	G	GACACACACACAC	.	2018-01-01	37	37	37	37	13	14	13	13	8	8
indels	Yes	chr11	106445908	AATATATATATATATATATATATATATATATAT	A	.	0/1	12	33	6	16	4	4	0	3	1	1
indels	Yes	chr11	106600785	AATAT	A	.	2018-01-01	26	49	10	12	3	4	0	0	3	5
indels	Yes	chr11	106970219	G	GGTGTGTGTGTGTGTGTGTGTGTGTGTGTGT	.	2018-01-01	49	49	26	26	5	5	11	11	13	14
indels	No	chr11	107079302	TTG	T	.	0/1	1	36	0	12	4	6	2	11	0	0
indels	Yes	chr11	107273599	GTATATATATATA	G	.	2018-01-01	18	36	16	26	0	10	12	13	3	5
indels	No	chr11	107304606	TTA	T	.	0/1	6	37	6	19	0	6	7	7	4	6
indels	Yes	chr11	107313608	G	GAGGAAGGA	.	0/1	22	42	8	17	7	7	0	3	0	1
indels	Yes	chr11	107331211	TTATATATATATATATATATATATA	T	.	0/1	12	38	6	7	3	3	0	4	2	4
indels	Yes	chr11	107370360	CT	C	.	2018-01-01	25	38	14	18	8	12	6	9	2	4
indels	Yes	chr11	107548220	A	AAAT	.	2018-01-01	22	22	20	20	4	4	2	2	2	2
indels	Yes	chr11	107877316	CATATATATATATATAT	C	.	0/1	19	38	5	15	0	2	5	5	2	3
indels	Yes	chr1	110796721	GGC	G	2018-01-01	0/1	25	41	22	24	0	3	6	9	5	14
indels	Yes	chr1	110796722	GC	G	.	2018-01-01	32	41	23	23	3	3	8	9	15	15
indels	Yes	chr11	108224797	A	AAC	.	2018-01-01	33	35	21	21	9	9	10	10	3	3
indels	Yes	chr11	108301624	AACACACACACACACACACACACACACAC	A	.	0/1	18	32	9	17	0	11	13	13	0	0
indels	No	chr11	108462473	GAGATCCAGT	G	.	0/1	0	56	0	17	0	18	2	2	1	10
indels	No	chr11	108462489	T	TTAAA	.	0/1	4	56	0	18	1	23	2	2	4	11
indels	Yes	chr11	108513087	AAAC	A	1|0	2018-01-01	13	18	6	22	3	4	0	4	0	0
indels	No	chr11	108743547	T	TCCC	.	0/1	7	36	11	19	7	7	3	17	3	5
indels	Yes	chr11	108819597	TTGTGTGTGTGTGTG	T	.	0/1	12	32	6	18	4	5	0	10	1	1
indels	No evidence	chr11	108835056	TTATATTTATATTTTATATAAATATAAAAATATATATTTATATTTTATATAAATATAAAAATATATATTTATATTTTATATAAATATAAAAATATATATTTATATTTTATATAAATATAAAAATA	T	.	2018-01-01	2	2	14	14	1	1	2	2	0	0
indels	Yes	chr11	108918038	AGTGTGTGTGTGTGT	A	.	0/1	19	40	8	16	19	20	0	11	0	0
indels	Yes	chr11	109010797	CTTTC	C	.	0/1	15	34	14	16	6	7	8	8	3	4
indels	Yes	chr11	109292859	A	AGGCGGC	.	2018-01-01	10	27	15	21	11	12	0	1	3	4
indels	Yes	chr11	10935386	ATGTGTGTGTGTGTGTGTG	A	.	0/1	46	53	11	11	9	11	9	9	6	7
indels	Yes	chr11	10935388	GTGTGTGTGTGTGTGTG	G	.	0/1	48	55	11	11	11	11	5	6	7	8
indels	Yes	chr11	109571571	A	AACACAC	.	2018-01-01	30	30	24	24	6	6	1	1	5	6
indels	No	chr11	109759341	CAG	C	.	0/1	1	36	0	22	0	8	0	1	7	29
indels	No	chr11	109759348	G	GTC	.	0/1	9	36	0	20	0	8	0	1	7	27
indels	Yes	chr11	109908440	CTGTG	C	.	2018-01-01	16	38	12	13	0	0	0	0	17	17
indels	Yes	chr11	11034115	GGT	G	.	2018-01-01	19	44	16	17	9	10	8	8	1	1
indels	Yes	chr11	110754948	CAGAGAGAGAGAGAGAG	C	.	0/1	20	41	7	16	0	3	5	5	2	3
indels	Yes	chr11	110800419	GAGATAGAT	G	.	0/1	16	34	8	16	9	9	0	9	0	0
indels	Yes	chr11	110875863	ATGTGTGTGTGTG	A	.	0/1	11	36	6	17	0	6	12	12	1	2
indels	Yes	chr11	110899845	CCA	C	.	0/1	10	25	16	28	2	13	17	18	0	0
indels	Yes	chr11	110899846	C	AC	.	0/1	10	24	15	27	14	15	0	17	0	0
indels	Yes	chr11	110943310	G	GACAC	.	2018-01-01	32	32	19	19	13	13	5	6	3	3
indels	No	chr11	111149281	GTC	G	.	0/1	0	33	1	12	0	3	2	2	2	13
indels	No	chr11	111188297	TTG	T	.	0/1	0	31	1	28	0	6	2	6	4	22
indels	No	chr11	111242754	TAC	T	.	0/1	5	44	10	20	0	2	6	6	7	13
indels	Yes	chr11	111435342	AACACACACACACACACACACAC	A	.	0/1	21	40	7	13	0	4	5	6	1	3
indels	Yes	chr11	111435352	CACACACACACAC	C	.	0/1	29	39	11	13	4	5	3	3	1	2
indels	Yes	chr11	111609606	T	TTGTGTG	.	2018-01-01	31	33	13	13	11	11	3	3	5	5
indels	No	chr11	111691644	GCA	G	.	2018-01-01	7	42	14	26	1	7	9	9	4	6
indels	Yes	chr1	111195566	ATG	A	.	2018-01-01	17	43	23	25	7	9	9	9	2	2
indels	Yes	chr1	11120202	CGGCGCAGAGT	C	0/1	2018-01-01	21	43	11	20	0	0	0	0	8	11
indels	Yes	chr11	112143717	CTTTCTTTCTTTCTTTCTTTCTT	C	.	2018-01-01	33	37	23	24	16	16	1	5	3	5
indels	Yes	chr11	112529883	G	GTG	.	0/1	23	47	15	20	8	9	3	10	5	5
indels	Yes	chr11	112580139	C	CCTTCTTCTTCTTCTT	.	2018-01-01	33	35	12	12	1	1	10	10	5	5
indels	Yes	chr11	112628429	G	GCACACACACACACACACA	.	2018-01-01	29	30	17	17	7	8	9	9	3	3
indels	Yes	chr11	112815560	C	CGT	.	2018-01-01	23	23	22	23	5	8	5	6	5	5
indels	Yes	chr11	112896500	CGAGAGAGAGAGAGAGAGAGA	C	.	0/1	16	37	7	15	9	10	0	8	2	2
indels	Yes	chr11	112926700	GATATATATATATAT	G	.	0/1	22	36	7	17	6	7	0	6	1	2
indels	Yes	chr11	113003326	ATGTGTGTGTGTGTGTG	A	.	0/1	9	19	14	22	0	14	10	10	2	5
indels	Yes	chr11	113044313	GATATATATAT	G	.	2018-01-01	15	46	7	11	0	6	10	10	1	2
indels	Yes	chr11	113081497	A	AAC	.	2018-01-01	31	31	21	21	11	13	6	7	3	3
indels	No	chr11	113206191	TA	T	.	0/1	4	33	0	31	4	8	3	20	1	11
indels	Yes	chr11	113290168	G	GCACA	.	2018-01-01	23	23	22	22	10	10	16	17	1	1
indels	Yes	chr11	113303010	TTCTCTC	T	.	0/1	10	25	5	16	0	8	5	5	2	3
indels	Yes	chr11	113693180	CAG	C	.	2018-01-01	11	29	15	16	7	7	6	10	2	5
indels	No	chr11	113970056	C	CATACACACATATATAAAATAGATTTATTTTATATATGTGTGTATGTGTATTTAT	.	0/1	0	31	0	22	0	10	4	12	0	2
indels	Yes	chr11	11406845	AT	A	.	0/1	21	32	9	27	9	9	2	14	2	2
indels	Yes	chr11	114080884	A	AGT	.	2018-01-01	31	32	17	17	9	10	10	10	5	6
indels	Yes	chr11	114101353	T	TGG	.	2018-01-01	23	33	17	17	11	11	10	10	4	4
indels	Yes	chr11	114106346	CCCTT	C	.	2018-01-01	25	29	20	20	8	8	3	3	3	3
indels	Yes	chr1	111414436	T	TACACACAC	.	2018-01-01	39	42	21	21	7	10	10	10	2	2
indels	Yes	chr11	114264910	CT	C	.	0/1	15	34	12	28	3	4	0	6	1	3
indels	No evidence	chr11	114831782	TGTGGGCCGCGCACTGGCTGTGTGATCGGGGACAGGGTGGGCCGCGCACTGGCTGTGTGATCGGGGACAGGGTGGGCCGCGCACTGGCTGTGTGATCGGGGACAGGGTGGGCCGCGCACTGGCTGTGTGATCGGGGACAGG	T	.	0/1	1	6	4	8	1	1	0	2	2	4
indels	No	chr11	114839368	GTA	G	.	0/1	5	30	8	20	3	4	0	7	3	6
indels	Yes	chr11	114839370	A	ATA	.	0/1	19	26	12	20	2	6	6	7	3	6
indels	Yes	chr11	114988162	TTGTGTGTGTGTGTGTGTGTGTG	T	.	0/1	23	48	10	21	6	6	0	12	1	3
indels	Yes	chr11	115125269	A	AAC	.	0/1	32	36	10	17	2	5	10	10	2	3
indels	Yes	chr11	115226426	AAC	A	.	2018-01-01	11	31	19	19	7	8	5	5	2	3
indels	Yes	chr11	115287416	T	TACAC	.	2018-01-01	56	64	21	21	7	8	13	14	5	6
indels	Yes	chr11	115460455	A	AAC	.	0/1	27	36	14	17	1	11	12	14	2	8
indels	No	chr11	115497991	CT	C	.	0/1	4	36	1	20	3	6	0	13	0	1
indels	Yes	chr11	115506027	CTG	C	.	2018-01-01	20	45	23	24	8	8	3	3	1	1
indels	Yes	chr11	115532158	CATATAT	C	.	0/1	18	34	6	12	4	4	0	4	0	0
indels	Yes	chr11	115817995	AGAAGGAAGGAAG	A	.	2018-01-01	31	31	16	16	5	5	5	5	1	2
indels	Yes	chr11	115998086	C	CTGTGTGTGTG	.	0/1	27	35	10	20	5	5	0	6	1	2
indels	Yes	chr11	11612706	C	CGT	.	2018-01-01	54	54	32	32	9	10	14	14	1	2
indels	No	chr11	116142404	TCA	T	.	0/1	4	32	10	19	0	5	8	11	1	2
indels	Yes	chr11	11616391	CAT	C	1|0	2018-01-01	18	46	8	15	1	8	19	19	5	6
indels	Yes	chr11	116319165	C	CCT	0/1	2018-01-01	35	36	29	30	7	9	27	27	3	4
indels	No	chr11	116400916	ATGTGTGTGTG	A	.	0/1	13	53	8	9	6	6	0	8	2	4
indels	Yes	chr11	116437629	G	GCACACA	.	2018-01-01	19	20	17	17	18	18	15	15	8	9
indels	Yes	chr11	11659376	ATGTGTGTGTGTGTG	A	.	0/1	15	33	13	21	0	12	9	10	4	4
indels	Yes	chr11	11660145	A	ACT	.	2018-01-01	34	35	13	13	5	5	14	14	0	0
indels	No	chr11	116609314	G	GCACA	GCACACA	.	2018-02-01	1	39	0	21	4	13	4	chr11	0	3
indels	Yes	chr11	116612405	A	AAC	.	2018-01-01	31	32	20	20	5	6	9	9	3	3
indels	Yes	chr11	116883565	C	CT	.	2018-01-01	12	34	12	12	1	3	7	7	18	23
indels	Yes	chr11	117020146	G	GTTTTTTTTTTTT	.	2018-01-01	31	32	22	22	4	4	1	1	9	9
indels	Yes	chr11	117044880	T	TTGTGTG	.	2018-01-01	31	32	21	21	2	2	2	2	14	14
indels	Yes	chr1	11172016	A	AAAAC	2018-01-01	0/1	25	29	19	19	6	6	0	0	37	37
indels	Yes	chr11	117348064	AGTGTGTGTGT	A	.	0/1	25	37	6	16	13	18	2	12	0	5
indels	Yes	chr11	117355601	AGTGTGTGTGTGTGT	A	.	0/1	15	48	8	17	10	10	1	6	0	1
indels	No	chr11	117383476	TCA	T	.	0/1	4	36	3	18	16	21	1	10	2	5
indels	Yes	chr1	111745318	T	TACACAC	.	2018-01-01	28	28	22	23	16	16	18	19	4	4
indels	Yes	chr11	11752561	CTGTGTGTGTGTGTGTGTGTG	C	.	0/1	22	36	7	15	8	8	0	20	1	3
indels	Yes	chr11	11752577	GTGTG	G	.	0/1	30	35	12	13	6	6	16	20	3	5
indels	Yes	chr1	111758623	TTCTCTCTCTCTC	T	.	0/1	15	36	13	29	1	11	2	2	0	1
indels	Yes	chr1	111758629	CTCTCTC	C	.	0/1	27	30	30	31	12	13	2	2	1	1
indels	No	chr11	117854890	GCA	G	.	0/1	7	40	10	23	1	11	18	19	1	9
indels	No	chr11	117924022	AACACAC	A	.	0/1	7	31	11	22	7	7	0	5	1	3
indels	Yes	chr11	117970196	A	AAGAAAGAAAGAAAG	.	2018-01-01	25	34	18	25	4	7	12	12	4	6
indels	No	chr11	118250849	CGT	C	.	0/1	0	45	0	17	1	8	1	5	3	15
indels	Yes	chr11	118518986	T	TTGTGTGTG	.	2018-01-01	32	33	23	23	4	4	5	5	10	10
indels	No	chr11	118616362	GAC	G	.	0/1	2	32	1	28	2	5	1	11	3	8
indels	No	chr11	119107305	GTA	G	.	0/1	1	44	0	23	1	5	2	3	9	24
indels	Yes	chr11	119201246	C	CTTTTT	.	0/1	16	33	13	23	1	12	8	8	5	6
indels	Yes	chr1	111930385	CTT	C	.	2018-01-01	30	41	10	23	2	8	7	11	0	1
indels	Yes	chr11	119356996	GT	G	.	2018-01-01	28	29	20	20	17	17	17	17	0	0
indels	Yes	chr11	119357004	A	AC	.	2018-01-01	24	29	24	24	23	23	19	19	1	1
indels	Yes	chr11	119357022	TG	T	.	2018-01-01	26	29	28	28	29	29	16	16	3	3
indels	Yes	chr11	119394588	C	CGTGTGTGTGTGTGT	.	2018-01-01	33	34	21	21	20	20	22	22	5	5
indels	Yes	chr11	11944588	C	CAT	.	0/1	23	34	4	12	7	7	1	3	0	0
indels	Yes	chr11	119461022	C	CTCAATTCAAT	.	2018-01-01	22	24	17	17	3	3	7	7	1	1
indels	No	chr11	119467812	AGTGT	A	.	0/1	4	30	4	14	2	3	0	6	0	0
indels	Yes	chr11	119517871	ATGTGTGTGTGTGTG	A	.	0/1	8	23	3	12	9	10	0	8	0	4
indels	Yes	chr1	111970431	T	TAC	.	2018-01-01	27	29	10	10	6	6	1	1	7	10
indels	Yes	chr1	111971411	A	AAT	.	2018-01-01	40	42	16	16	3	3	1	1	5	6
indels	Yes	chr11	119723367	T	TTGTGTGTGTGTGTG	.	2018-01-01	25	25	25	25	8	9	8	8	2	2
indels	No	chr11	119854784	G	GCCCCCCCC	.	0/1	0	23	12	26	4	10	6	11	2	2
indels	Yes	chr11	119959497	ATG	A	.	2018-01-01	16	31	16	18	6	7	5	5	0	0
indels	Yes	chr11	120191230	G	GTATATA	.	0/1	33	35	19	19	4	6	8	8	1	1
indels	No	chr11	120313136	TAC	T	.	0/1	5	44	0	18	2	24	4	10	0	1
indels	Yes	chr11	120613235	A	AT	.	0/1	19	33	32	33	12	13	15	16	1	1
indels	Yes	chr11	120624006	CTGTGTGTG	C	.	2018-01-01	16	49	13	19	2	8	7	7	2	5
indels	Yes	chr11	121070034	A	AAAAGAAAGAAAGAAAG	.	2018-01-01	35	35	18	18	3	3	0	0	4	4
indels	No	chr11	121101282	G	GCCCT	.	0/1	1	43	0	37	0	6	3	4	4	33
indels	Yes	chr11	121313383	T	TTTAC	0/1	2018-01-01	20	27	27	32	8	8	6	11	0	1
indels	No	chr11	121547057	GTA	G	.	0/1	4	59	4	29	0	3	0	0	2	14
indels	Yes	chr11	121713329	TA	T	.	0/1	14	41	12	27	7	7	2	8	6	8
indels	Yes	chr11	121818390	CTTT	C	.	2018-01-01	22	26	15	16	5	6	8	8	8	8
indels	Yes	chr11	121859433	G	GAAGGAAAGAAAAGA	.	2018-01-01	28	31	15	15	14	14	8	8	3	6
indels	Yes	chr11	121859469	G	GGAAA	0/1	2018-01-01	10	30	7	14	11	13	4	8	1	4
indels	Yes	chr11	121905483	TATAC	T	.	0/1	11	38	24	28	1	13	17	20	2	2
indels	Yes	chr11	121905485	T	CACAT	.	0/1	17	38	5	20	14	14	1	16	0	1
indels	Yes	chr11	121951206	TTTTC	T	.	2018-01-01	6	16	4	9	0	2	6	6	5	5
indels	Yes	chr11	122150368	TACACAC	T	.	2018-01-01	19	41	15	15	2	2	1	1	11	11
indels	Yes	chr11	122152514	CA	C	2018-01-01	0/1	24	29	18	20	1	4	3	3	6	8
indels	Yes	chr11	122238467	AAAAGAAAGAAAGAAAG	A	.	2018-01-01	10	30	4	14	0	1	1	1	5	8
indels	Yes	chr11	122442230	T	TAC	.	0/1	26	32	9	23	0	4	7	10	2	6
indels	Yes	chr11	122500709	AAC	A	.	2018-01-01	15	32	22	26	11	11	6	7	2	2
indels	Yes	chr11	122705443	ATGTG	A	.	2018-01-01	15	47	8	16	10	10	0	5	3	5
indels	Yes	chr11	122849507	T	TC	.	0/1	28	57	14	25	0	6	8	10	1	1
indels	Yes	chr11	122849511	T	TC	.	0/1	27	58	12	24	0	7	10	11	1	1
indels	Yes	chr11	122867086	A	AAAAGAAAGAAAG	.	2018-01-01	40	40	10	10	6	6	3	3	5	5
indels	Yes	chr11	122895916	A	ATGTG	.	0/1	15	34	9	14	12	13	0	10	1	1
indels	Yes	chr11	123086842	CTTTTTTTTT	C	.	0/1	15	33	7	22	0	11	21	21	1	1
indels	Yes	chr11	123231476	TTTCCTTCCTTCCTTCC	T	.	0/1	13	36	4	8	1	11	8	10	0	1
indels	Yes	chr11	123274141	A	AATG	.	0/1	11	17	3	10	0	4	5	5	0	0
indels	Yes	chr11	123290406	AGTGTGT	A	.	2018-01-01	23	31	21	22	4	4	5	6	2	2
indels	Yes	chr11	123300968	CCT	C	.	0/1	9	34	7	27	7	9	1	12	2	10
indels	Yes	chr11	123300970	T	TCT	.	0/1	24	36	19	28	1	8	9	12	6	8
indels	Yes	chr11	123340484	TTTCCTTCC	T	0|1	2018-01-01	36	43	22	23	4	4	5	8	0	0
indels	No	chr11	123359637	T	TG	.	0/1	8	49	11	26	12	13	0	17	2	6
indels	Yes	chr11	123431391	CGTGTGTGTGT	C	.	2018-01-01	16	27	23	26	2	5	7	7	3	5
indels	Yes	chr11	123550702	AT	A	.	0/1	35	48	28	29	5	5	10	10	1	1
indels	Yes	chr1	112360662	GCACA	G	.	2018-01-01	29	48	15	15	4	4	4	4	7	7
indels	Yes	chr11	123640601	C	CATATAT	.	2018-01-01	39	39	17	17	2	2	2	2	13	15
indels	No	chr11	123755912	CTTCCT	C	.	0/1	0	39	0	22	0	0	0	4	4	22
indels	Yes	chr11	123771279	AC	A	.	0/1	12	40	4	31	2	3	0	5	4	28
indels	No	chr11	123858112	G	GGGACATGATTTCCAATTTCACCCATGTCCCTACAAA	.	0/1	0	41	0	18	2	10	0	1	4	26
indels	Yes	chr11	123961109	T	TACACACAC	.	2018-01-01	54	54	20	20	3	3	6	6	9	9
indels	Yes	chr11	123963614	GAGA	G	1|0	2018-01-01	12	22	14	14	1	1	3	4	9	10
indels	No	chr11	123980984	GA	G	.	0/1	11	64	0	23	1	1	1	12	3	5
indels	No	chr11	123980997	C	CT	.	0/1	1	63	0	23	1	1	0	14	3	5
indels	No	chr11	124036740	GTA	G	.	2018-01-01	2	43	9	18	0	0	1	1	8	10
indels	Yes	chr1	112409201	AACACACAC	A	.	0/1	18	60	6	11	0	8	4	4	6	9
indels	Yes	chr11	124154013	AATAAT	A	0|1	2018-01-01	33	37	25	26	4	5	6	6	11	11
indels	No	chr11	124203178	AGT	A	.	0/1	1	47	0	21	0	6	3	4	5	16
indels	No	chr11	124203182	A	AAC	.	0/1	2	48	0	18	0	6	3	4	4	16
indels	No	chr11	124303293	ATG	A	.	0/1	10	42	9	16	2	25	16	24	29	183
indels	Yes	chr11	124303329	G	GTGTA	.	0/1	23	44	5	20	20	35	1	28	52	91
indels	Yes	chr11	124422401	T	TTTGC	.	0/1	25	47	17	24	9	10	0	7	0	0
indels	Yes	chr11	124446273	G	GTATTATTATTATTATTATTAT	.	2018-01-01	43	43	24	24	5	5	4	4	1	1
indels	Yes	chr11	124688412	CT	C	.	2018-01-01	24	32	15	17	3	3	4	5	10	15
indels	Yes	chr11	124830138	TAAAGAAAAGTGCCGCGGAGCCTGCAGTGAGCCGAGATTGCGCCACTGCACTCCAGCCTGGGCGACAGCGAGACTCCGTCTCAAAAAAAAAAAAAAAAAAAAAAAAAAA	T	.	2018-01-01	11	11	9	9	2	2	8	8	5	5
indels	Yes	chr11	124906278	T	TTTCTC	.	2018-01-01	31	32	4	4	6	6	4	4	0	0
indels	Yes	chr11	125065779	G	GCACA	.	0/1	26	49	12	24	12	12	0	4	1	2
indels	Yes	chr11	125219733	T	TCACACA	.	2018-01-01	29	29	15	16	4	6	6	6	2	2
indels	Yes	chr11	125277646	AC	A	1|0	2018-01-01	36	39	25	26	9	9	9	9	4	4
indels	No	chr11	125345171	TACAC	T	.	0/1	8	50	15	26	10	14	0	12	0	4
indels	Yes	chr11	125401497	TTG	T	.	2018-01-01	13	32	8	8	11	11	8	11	2	2
indels	Yes	chr11	125527082	T	TTG	.	2018-01-01	52	54	30	30	11	12	9	9	1	1
indels	Yes	chr11	125548873	T	TTATA	.	0/1	43	44	20	20	5	5	13	14	0	0
indels	Yes	chr11	12555355	C	CTGAGGA	.	2018-01-01	25	26	28	28	12	12	10	10	1	1
indels	Yes	chr11	125828442	T	TTATA	.	0/1	28	28	20	20	9	9	8	8	5	5
indels	Yes	chr11	125828460	A	ATATATATGTG	.	2018-01-01	29	29	27	27	9	9	14	14	4	5
indels	Yes	chr1	112624399	AT	A	.	0/1	10	31	0	19	1	1	1	9	5	11
indels	Yes	chr11	12628046	C	CTATATATA	.	2018-01-01	37	38	13	13	3	3	6	6	2	2
indels	Yes	chr11	126726450	GTATATATATATATATATATATA	G	.	0/1	10	37	6	11	1	6	7	7	0	1
indels	No	chr11	126736425	T	TG	.	0/1	4	48	1	21	7	22	0	16	0	0
indels	No	chr1	112681292	A	ACT	.	0/1	3	39	0	25	2	4	2	25	4	21
indels	No	chr1	112681296	CAG	C	.	0/1	2	39	0	24	2	4	2	25	3	21
indels	Yes	chr11	126842064	T	TAGAGAGAGAGAGAG	.	0/1	29	30	17	17	5	5	9	9	5	5
indels	Yes	chr11	127116258	G	GTGTGTGT	.	0/1	34	38	7	10	2	11	3	13	4	13
indels	Yes	chr1	112713437	C	CAAGAAAGAAAGAAAGA	.	2018-01-01	34	35	9	9	3	3	5	5	8	8
indels	Yes	chr11	127330506	T	TAA	.	0/1	12	27	12	20	16	17	2	10	3	3
indels	No	chr11	127335977	GAAGAGAGAGAGAGAGAGAGA	G	.	0/1	11	46	0	18	3	6	0	10	1	1
indels	Yes	chr1	112764715	TCCTCAAGTGGGTCCCTGACCCCTGACCCCTGAGAAGCCTAACTGGGAGGCACCCCC	T	.	2018-01-01	33	33	11	11	8	8	4	4	10	10
indels	Yes	chr11	127810196	CT	C	.	2018-01-01	36	43	13	16	4	5	13	16	1	2
indels	No	chr11	128153171	C	CCTGGTCTAGGTCTCTTGAAATACAAAAGACCCAGCCCAGGAAAA	.	0/1	0	31	0	34	5	19	1	12	0	2
indels	No	chr11	128254953	AAT	A	.	0/1	11	62	5	18	0	5	5	7	0	0
indels	Yes	chr11	128306813	AAAGAAGAAAG	A	.	0/1	9	34	9	29	3	3	0	4	1	6
indels	Yes	chr11	128320854	G	GTATATATATATATATATATAGATATATA	.	2018-01-01	43	43	5	5	1	1	4	4	1	1
indels	No	chr11	128480760	C	CTGTGCTTTAAAGGCAGAAACAGAACAT	.	0/1	0	37	0	21	0	2	1	6	1	5
indels	No	chr11	128514134	G	GCC	.	2018-01-01	9	48	1	33	3	14	3	14	1	10
indels	Yes	chr11	128563836	CGAGAGA	C	.	2018-01-01	18	33	11	12	5	5	5	5	1	2
indels	Yes	chr11	128956442	CAT	C	.	2018-01-01	35	45	25	28	3	6	15	15	1	1
indels	Yes	chr11	128956445	G	GCA	.	0/1	36	45	29	29	6	6	14	15	1	1
indels	Yes	chr11	129091374	CTGTG	C	.	2018-01-01	23	37	19	20	5	5	3	3	1	1
indels	Yes	chr11	129105795	A	AAC	.	2018-01-01	45	46	26	27	2	2	8	11	3	3
indels	Yes	chr11	129154748	G	GCA	.	2018-01-01	30	32	19	21	12	13	5	5	5	6
indels	Yes	chr11	129179495	C	CTTTTTT	.	2018-01-01	23	26	21	21	11	11	6	6	5	5
indels	Yes	chr1	112930465	GAGGAAGGAAGGA	G	.	0/1	13	34	7	11	10	10	0	11	5	7
indels	Yes	chr1	112930620	GAGGAAGGAAGGA	G	.	0/1	18	33	4	14	0	12	4	4	1	2
indels	Yes	chr11	12950751	GC	G	.	2018-01-01	34	36	15	15	8	8	11	11	4	4
indels	Yes	chr11	129512440	A	ATGTGTGTGTG	.	2018-01-01	37	38	20	20	6	6	5	5	5	5
indels	Yes	chr11	129542041	GATATAT	G	.	0/1	18	40	7	10	0	1	4	4	2	3
indels	No	chr11	129555863	AAC	A	.	0/1	2	52	0	20	4	6	1	3	1	4
indels	Yes	chr11	129576737	G	GCACACA	.	2018-01-01	31	35	15	15	10	11	2	4	2	2
indels	Yes	chr11	129696462	A	AAAAT	.	2018-01-01	30	46	22	22	8	8	7	9	1	1
indels	Yes	chr11	129847150	T	TACAC	.	2018-01-01	34	37	23	24	6	7	13	13	0	1
indels	Yes	chr11	129911532	TA	T	0/1	2018-01-01	19	43	15	36	2	3	7	7	0	2
indels	Yes	chr1	113008067	A	AACACACACACACAC	.	2018-01-01	38	38	26	26	17	17	17	17	9	9
indels	No evidence	chr11	130301354	TTGGCTATGTTAAACCCAGGACCTGGCTATGTTAAACCCAGGACC	T	.	2018-01-01	0	0	4	4	2	2	2	2	4	4
indels	No	chr11	130440156	CGCACGTGT	C	.	0/1	0	22	0	21	4	21	2	10	1	6
indels	Yes	chr11	130529290	C	CAG	.	2018-01-01	35	36	18	18	9	10	6	8	4	4
indels	Yes	chr11	130626264	TG	T	.	2018-01-01	22	31	5	7	0	0	4	5	1	1
indels	No	chr11	130649266	T	TAGAA	.	0/1	1	33	0	25	3	15	2	17	1	8
indels	Yes	chr11	130925519	CATATATATATATATAT	C	1|0	2018-01-01	22	50	5	6	0	1	8	8	1	2
indels	No	chr11	131059867	CTGTGTG	C	.	0/1	6	29	8	21	0	8	11	12	2	5
indels	Yes	chr1	113111483	A	AATATAAATAAAT	.	0/1	16	24	13	26	0	5	10	10	1	1
indels	Yes	chr11	13117376	T	TA	0/1	2018-01-01	10	22	16	29	10	10	0	8	1	2
indels	Yes	chr11	13117378	A	AT	0/1	2018-01-01	10	22	12	29	0	10	6	6	0	1
indels	No	chr11	131177119	AAC	A	.	0/1	8	33	8	26	0	5	8	8	2	4
indels	Yes	chr11	131631703	CAATA	C	.	2018-01-01	51	56	7	7	2	2	1	1	5	5
indels	Yes	chr11	131735737	CCA	C	.	0/1	11	31	11	21	0	14	8	17	8	22
indels	Yes	chr11	131743924	AAT	A	.	2018-01-01	15	39	11	13	0	0	5	5	2	2
indels	No	chr11	131874499	TTC	T	.	0/1	7	42	10	21	9	9	0	6	1	3
indels	Yes	chr11	131913852	ATGTGTG	A	.	0/1	9	28	8	20	9	10	0	14	2	6
indels	Yes	chr11	131939258	ATCACAGGTTAGTTAACACGTCACTCAGCCAAGTTAACACGTCAAACTGACTGTCACCGGTTAGTTAACACGTCACACAGCCAAGTTAACACGTCAAACTGACCGTCACAGGTTAGTTAACATGTCACACAGCCAAGTTAACACGTCACACTGACCG	A	.	0/1	14	23	3	14	0	9	8	8	0	2
indels	Yes	chr11	131974831	GTA	G	.	2018-01-01	16	40	7	16	3	3	3	3	0	1
indels	Yes	chr11	132008508	CT	C	0|1	2018-01-01	54	54	32	33	5	5	11	11	4	4
indels	Yes	chr11	132057108	CGT	C	.	2018-01-01	12	39	19	22	6	6	11	12	4	5
indels	Yes	chr11	132148637	T	TTC	.	2018-01-01	32	32	16	16	6	6	8	9	3	5
indels	Yes	chr11	132390596	G	GTGTGTGTGTA	.	2018-01-01	36	37	17	17	14	22	18	18	4	4
indels	Yes	chr11	132557264	CATATATATATATATATATAT	C	.	2018-01-01	26	49	3	10	4	4	1	1	2	2
indels	Yes	chr1	113288635	CTTTT	C	.	0/1	22	43	8	24	0	9	6	10	1	5
indels	Yes	chr11	133006723	CGTGTGTGTGTGTGTGT	C	.	0/1	16	27	9	23	8	8	0	4	1	1
indels	Yes	chr11	133061399	GGT	G	0/1	2018-01-01	9	31	9	10	15	23	7	10	5	8
indels	Yes	chr11	133210503	CTG	C	.	2018-01-01	18	46	20	23	11	16	4	4	5	7
indels	Yes	chr11	13335776	C	CCACACA	.	2018-01-01	34	34	14	14	8	8	7	7	9	9
indels	Yes	chr1	113342771	C	CTTTTTTTTTTTTT	.	2018-01-01	42	42	20	20	10	10	13	13	7	7
indels	Yes	chr11	133528161	T	TTGGA	0/1	2018-01-01	20	34	10	22	0	12	23	24	9	11
indels	Yes	chr11	133817603	T	TTCTCTCTCTCTC	.	2018-01-01	20	33	11	25	2	3	10	10	1	1
indels	Yes	chr11	133818512	CTG	C	.	2018-01-01	12	25	18	21	8	9	5	5	0	2
indels	Yes	chr11	13386829	A	AAC	.	2018-01-01	38	40	28	28	2	2	7	8	4	4
indels	No	chr11	134317602	G	GT	.	0/1	1	56	0	28	0	5	2	14	3	11
indels	Yes	chr11	134430800	TG	T	.	0/1	25	39	13	29	0	12	6	9	1	1
indels	Yes	chr11	134534236	ACCCACACGCCGTCCACCGAGGGCAGGTCGCCCACACGCCGTCCACCGAGGGCAGGTCGCCCACTCGCCGTCCACAGAGGGCAGGTCG	A	.	2018-01-01	6	12	6	8	6	6	7	7	0	0
indels	Yes	chr11	134596547	T	TCACACACACA	.	2018-01-01	46	47	23	23	20	20	12	12	2	2
indels	No	chr11	134610041	TGCGTGTGGGTTGTGTGTG	T	.	0/1	2	19	2	21	167	249	20	385	66	208
indels	No	chr11	134694953	CATAT	C	.	2018-01-01	7	42	5	12	4	5	1	2	0	1
indels	Yes	chr11	134802056	GAAGAAAGAAAGA	G	.	0/1	11	32	13	23	0	7	9	10	1	1
indels	Yes	chr11	134886289	C	CAGGAAGGA	.	0/1	12	25	2	8	11	13	1	10	2	5
indels	Yes	chr11	13628001	AT	A	.	0/1	25	54	13	24	0	14	12	13	1	2
indels	Yes	chr11	13628002	T	TT	.	0/1	21	54	10	22	14	14	0	11	1	2
indels	Yes	chr1	113958605	ATATTAATTATATAATTAAT	A	.	0/1	25	41	11	25	22	23	0	25	0	1
indels	Yes	chr1	113991982	G	GGTGTGTGTGTGT	.	0/1	19	31	7	23	1	7	13	13	2	2
indels	Yes	chr11	14067174	T	TATA	.	2018-01-01	46	48	23	23	9	9	4	4	1	1
indels	Yes	chr11	14162575	C	CCCCCCA	.	0/1	15	30	9	21	0	9	3	3	2	5
indels	Yes	chr11	14168563	CTTTT	C	.	0/1	24	35	4	19	0	10	3	4	0	0
indels	Yes	chr1	114240774	AACACACAC	A	.	0/1	14	39	17	28	22	22	0	9	2	4
indels	Yes	chr11	14262135	TTGTG	T	.	2018-01-01	10	33	23	24	3	3	2	3	3	3
indels	No	chr11	14306369	G	GC	.	0/1	5	41	0	27	5	5	0	13	2	9
indels	No	chr11	14306376	AG	A	.	0/1	8	41	0	25	5	5	0	12	2	8
indels	Yes	chr11	14346856	AT	A	.	2018-01-01	31	43	16	19	3	5	6	8	5	7
indels	Yes	chr11	14483779	CT	C	.	0/1	23	39	0	25	1	3	2	6	2	11
indels	Yes	chr11	14486608	TACACAC	T	.	0/1	11	35	9	11	4	4	0	3	4	5
indels	Yes	chr11	14492445	TACACACACACACAC	T	.	2018-01-01	33	39	23	23	4	4	4	4	5	5
indels	Yes	chr11	14613900	G	GTCTCTC	.	0/1	9	23	15	27	0	3	5	5	0	1
indels	Yes	chr11	14615159	TGAGAGAGAGAGA	T	.	0/1	10	28	4	6	0	2	10	10	0	2
indels	No	chr1	11464665	TCTCTCTCTCCTTCCTTCCTTCCTTCCTTCCTTCCTTCCTTCCTTCCTTCC	T	.	0/1	3	31	1	14	1	6	4	5	0	8
indels	No	chr11	14676333	TAC	T	.	0/1	9	45	6	14	9	11	1	6	5	10
indels	Yes	chr11	14743321	GC	G	.	2018-01-01	29	34	5	5	2	2	0	0	3	3
indels	Yes	chr11	14756332	CT	C	.	0/1	18	45	1	28	0	2	2	2	17	26
indels	Yes	chr11	14771445	C	CATATATATATATATATATATATATATATAT	.	2018-01-01	43	43	11	11	2	2	2	2	12	12
indels	Yes	chr1	11525225	AAGAAAGAAAGAAAGAAAGAAAGAAAGAGAGAGAGAGAGAGAGAGAGAGAGAGAGAGAGAGAGAG	A	.	0/1	17	27	3	6	5	5	0	4	0	5
indels	Yes	chr1	115331634	TTTTCTTTCTTTCTTTCTTTC	T	.	0/1	16	36	4	13	5	5	0	2	1	3
indels	Yes	chr11	15394155	T	TTTTC	.	2018-01-01	22	41	4	12	2	2	0	1	2	4
indels	Yes	chr1	115417795	A	ATG	.	2018-01-01	33	33	14	14	11	12	9	9	1	1
indels	No evidence	chr11	154216	CACACAA	C	.	0/1	0	3	0	13	0	6	5	5	2	3
indels	Yes	chr11	15493847	C	CGTGTGTGTGTGT	.	2018-01-01	47	47	25	25	6	6	6	6	8	8
indels	Yes	chr11	15493879	T	TGTGTGTGTG	.	0/1	42	45	16	25	7	8	4	6	6	8
indels	No	chr1	1155285	CCCAT	C	.	0/1	0	26	0	27	1	4	1	10	2	10
indels	Yes	chr11	15530301	C	CTTAT	0/1	2018-01-01	25	46	14	17	3	3	0	0	0	1
indels	Yes	chr11	1564283	T	TAC	.	0/1	15	24	8	15	0	6	12	12	2	2
indels	Yes	chr11	1564295	T	TAC	.	0/1	12	24	7	14	0	6	10	11	2	2
indels	Yes	chr11	1566895	CTCCTTCCTTCCT	C	.	2018-01-01	12	20	6	14	0	3	3	3	1	1
indels	No	chr1	115864197	ATGTG	A	.	0/1	4	35	9	21	0	5	7	9	2	7
indels	Yes	chr11	16000588	C	CAT	.	2018-01-01	33	35	12	12	4	4	2	2	1	1
indels	No	chr11	16014496	TG	T	.	2018-01-01	5	39	1	33	7	17	3	15	0	2
indels	No	chr11	16014501	T	TC	.	2018-01-01	0	39	1	34	6	17	4	13	0	2
indels	Yes	chr11	16031671	TACACACACAC	T	.	0/1	23	52	6	13	0	9	10	10	4	6
indels	Yes	chr11	16147362	T	TAGGAAGGA	.	2018-01-01	36	36	7	7	5	5	4	4	5	5
indels	Yes	chr11	16153812	AGAAG	A	.	0/1	22	25	8	9	3	3	4	4	3	5
indels	Yes	chr11	16261821	A	AGTGT	.	2018-01-01	37	39	18	18	8	8	4	6	4	4
indels	Yes	chr1	116281910	GTAT	G	.	0/1	18	40	1	7	2	13	0	0	1	2
indels	Yes	chr11	16304635	G	GTATATATA	.	0/1	36	39	17	17	4	4	3	3	4	4
indels	No	chr1	116393528	AGTGT	A	.	2018-01-01	10	41	5	18	9	10	3	8	1	2
indels	Yes	chr11	16468990	T	TTCTC	0|1	2018-01-01	38	39	15	15	18	18	17	18	9	9
indels	Yes	chr11	16469000	C	CTCTCTCTT	1|0	2018-01-01	36	38	15	15	16	19	18	19	9	10
indels	Yes	chr1	116514598	T	TAAATAAATTAAA	.	2018-01-01	32	34	25	25	4	4	1	1	9	9
indels	No	chr11	16582093	CATATGTTTATACGTACATATATGTTTATACGTACATATATGTTTATACGTACATGTATGTTTATACGTACATATATGTTTATACGTACAT	C	.	0/1	2	23	4	19	3	3	0	17	0	1
indels	Yes	chr1	116616331	T	TAC	.	0/1	40	42	24	24	9	10	1	1	26	28
indels	Yes	chr1	116616341	C	CA	2018-01-01	0/1	36	43	26	27	9	10	2	2	25	29
indels	No	chr1	116693884	AACACACAC	A	.	2018-01-01	11	46	13	22	3	6	7	7	1	3
indels	No	chr1	116787637	GAC	G	.	0/1	0	46	0	24	1	4	1	13	2	8
indels	Yes	chr11	16840338	C	CT	2018-01-01	0/1	12	26	25	25	16	17	4	6	3	3
indels	Yes	chr1	11692512	GAGGAAGGAAGGAAGGAAGGA	G	.	2018-01-01	12	23	6	8	1	1	0	0	2	2
indels	Yes	chr11	17004327	T	TACACACAC	.	2018-01-01	29	33	36	36	26	27	13	15	1	2
indels	Yes	chr11	1705723	ACCCAGGACAGCAAAGGGTCCGGGAGGGCAGAGGATCCAGGAGGACAGGGGG	A	.	2018-01-01	20	21	5	5	5	5	2	2	10	10
indels	No	chr11	1705757	ATCCAGGAGGACAGGGGG	A	.	0/1	1	22	1	4	0	4	0	3	2	3
indels	Yes	chr1	117213810	AGAAGGAAGGAAG	A	.	0/1	15	37	8	13	0	8	4	4	0	2
indels	Yes	chr1	117326148	TA	T	.	0/1	22	41	15	26	2	7	6	6	1	3
indels	Yes	chr1	117373371	T	TCTCACACACA	.	2018-01-01	53	54	35	35	9	11	2	2	17	18
indels	No	chr1	117631882	CTA	C	.	0/1	5	43	8	18	0	8	13	13	2	3
indels	Yes	chr1	117680068	A	AACACACACACACACACACACACACAC	.	0/1	25	46	11	18	14	14	0	4	1	5
indels	Yes	chr11	17755810	G	GGTGTGTGTGTGTGTGTGTGT	.	2018-01-01	26	26	25	25	20	20	5	5	4	4
indels	No	chr11	17761220	CTGTG	C	.	0/1	5	30	0	14	1	8	5	12	0	6
indels	Yes	chr11	17828883	CA	C	0|1	2018-01-01	34	41	17	18	15	15	10	10	5	5
indels	Yes	chr11	1790946	GAAAT	G	.	2018-01-01	14	28	13	20	2	2	1	3	1	5
indels	No	chr11	17911991	CTG	C	.	0/1	0	47	0	33	4	24	2	7	0	0
indels	Yes	chr1	117913360	A	AGTGTGT	.	2018-01-01	49	49	22	22	4	4	4	4	20	21
indels	No evidence	chr11	179246	GAA	G	.	0/1	4	8	10	46	1	9	13	19	0	12
indels	Yes	chr1	117960156	A	AATATATATATATATAT	.	2018-01-01	43	44	12	12	0	0	1	1	11	11
indels	Yes	chr1	117960312	G	GCACACA	.	0/1	41	43	19	19	0	1	11	11	10	10
indels	No	chr11	1797376	GGGATGGAGAGGA	G	.	0/1	3	31	0	2	10	32	15	65	33	85
indels	Yes	chr11	18020075	A	ATG	0/1	2018-01-01	37	43	17	17	10	11	13	15	2	3
indels	Yes	chr1	118055372	T	TACACACACAC	.	2018-01-01	32	37	27	27	1	1	3	4	17	20
indels	Yes	chr11	183691	T	TA	.	0/1	7	20	11	40	4	4	2	20	3	14
indels	Yes	chr1	118396764	GTA	G	.	2018-01-01	11	40	25	26	4	5	0	0	13	15
indels	Yes	chr11	184503	CCCA	C	.	0/1	11	20	24	51	0	9	29	30	0	23
indels	Yes	chr1	118502732	CGTGT	C	.	0/1	19	60	13	24	8	9	0	4	3	8
indels	Yes	chr1	11853206	C	CT	.	0/1	9	34	14	25	14	16	2	10	1	2
indels	Yes	chr11	185352	A	AAAG	.	0/1	14	22	36	56	1	3	19	22	4	18
indels	Yes	chr11	1855045	C	CGT	.	0/1	29	40	12	24	4	4	0	5	0	0
indels	Yes	chr11	185509	A	AT	.	0/1	17	32	19	38	0	3	11	11	1	12
indels	No	chr1	118551871	AACAC	A	.	0/1	6	30	0	12	2	7	1	2	5	18
indels	No	chr1	118551873	CAC	C	.	0/1	7	30	10	13	6	7	1	2	16	20
indels	Yes	chr11	18702052	CTGTGTG	C	.	2018-01-01	22	33	12	12	6	6	3	3	1	1
indels	Yes	chr1	11872721	TTGTGTGTGTG	T	.	0/1	13	38	20	27	5	6	0	7	0	0
indels	No	chr11	18898581	GAT	G	0/1	2018-01-01	9	48	17	35	11	13	2	6	2	2
indels	No	chr1	118987918	AAG	A	.	0/1	2	42	0	35	0	11	3	9	1	4
indels	Yes	chr1	119067387	ATTTTCAAT	A	2018-01-01	0/1	44	46	21	21	0	0	10	10	12	12
indels	Yes	chr1	119097734	T	TACACACACAC	.	2018-01-01	29	30	22	22	4	4	1	1	4	4
indels	Yes	chr11	19226252	TAATA	T	.	2018-01-01	7	27	9	18	4	4	0	2	1	2
indels	Yes	chr1	11924109	A	AGTGT	.	2018-01-01	33	40	23	24	10	10	8	9	3	4
indels	No	chr1	119370598	GGA	G	.	0/1	7	36	1	15	0	8	6	7	1	4
indels	Yes	chr1	119435892	A	AGAAG	.	2018-01-01	18	26	4	5	6	6	7	9	7	8
indels	Yes	chr1	119436108	GGAAA	G	.	0/1	14	28	4	12	6	6	1	9	2	4
indels	Yes	chr1	119600945	T	TA	0/1	2018-01-01	21	53	7	17	0	15	15	15	1	1
indels	No	chr11	19651088	GAC	G	.	0/1	4	29	0	25	0	3	0	0	4	16
indels	Yes	chr1	119678338	C	CAGATAGAT	0/1	2018-01-01	32	32	17	17	12	13	6	6	3	3
indels	Yes	chr1	119678384	G	GAGAGAT	0/1	2018-01-01	22	28	17	24	14	16	4	9	3	3
indels	No	chr11	19822218	GGT	G	.	0/1	2	39	0	23	1	5	0	1	2	6
indels	Yes	chr1	119849976	GACACACACACAC	G	.	2018-01-01	18	32	10	11	1	4	10	10	3	3
indels	Yes	chr1	119886516	G	GTATATA	.	2018-01-01	33	34	10	10	8	8	6	6	2	3
indels	No	chr1	119908422	A	AAATAATGCAACCATTTCTTGAGCATTTATTGGTACTAAGAGCAATGATAAGGCATGTAAACGGCCTAGCATTGCCCTTAGTACC	.	0/1	0	35	0	26	1	6	1	2	1	4
indels	Yes	chr1	1200983	T	TTGTG	.	2018-01-01	20	21	16	16	4	4	1	1	10	12
indels	Yes	chr1	120110724	C	CGGAAAG	.	0/1	17	39	8	28	4	4	0	13	0	1
indels	No	chr1	120110731	AAGG	A	.	0/1	5	28	6	25	4	4	0	12	0	1
indels	Yes	chr1	120110737	AGG	A	.	0/1	17	40	7	27	4	4	0	11	0	1
indels	Yes	chr1	120110741	AG	A	.	0/1	24	40	8	28	5	5	1	9	0	1
indels	Yes	chr11	20122092	GGTGTGTGTGT	G	.	0/1	11	30	11	19	6	7	2	6	3	4
indels	Yes	chr11	20122096	TGTGTGT	T	.	0/1	14	24	16	17	7	7	5	6	3	4
indels	Yes	chr11	20179749	ATGGTGG	A	.	0/1	10	23	4	6	0	3	9	9	0	12
indels	Yes	chr11	20207732	TTGTGTGTGTGTG	T	.	2018-01-01	28	42	20	20	8	9	7	9	1	1
indels	Yes	chr1	120268802	AGTGT	A	.	0/1	12	40	9	19	0	2	6	6	1	1
indels	No	chr1	120296033	AAC	A	.	2018-01-01	9	52	19	21	7	8	7	10	1	1
indels	Yes	chr11	20431200	A	AACACACAC	.	2018-01-01	43	47	34	34	2	2	11	11	11	12
indels	Yes	chr1	120537152	TACAC	T	.	0/1	18	47	49	52	19	19	5	17	20	23
indels	No	chr1	120543225	CA	C	.	0/1	5	30	0	22	5	5	1	24	0	0
indels	Yes	chr1	120545152	G	GAA	.	0/1	12	40	18	69	39	71	4	23	6	14
indels	Yes	chr1	120547403	A	AT	.	0/1	11	23	1	29	2	2	6	29	0	5
indels	No	chr1	120551571	A	AAT	.	0/1	2	24	2	21	22	22	0	36	0	1
indels	No	chr1	120551572	G	GGAA	.	0/1	0	17	2	20	22	22	0	34	0	1
indels	No	chr1	120552515	CTGT	C	.	0/1	1	24	0	7	8	8	0	25	0	3
indels	No	chr1	120553360	CTCTT	C	.	0/1	8	34	0	27	8	8	0	39	0	1
indels	Yes	chr1	120557786	G	GA	.	0/1	11	34	8	29	12	14	0	22	1	3
indels	No	chr1	120558406	TGTCA	T	.	0/1	3	35	4	42	12	23	0	35	1	7
indels	No	chr1	120558751	AG	A	.	0/1	4	35	9	49	8	15	1	36	1	5
indels	No	chr1	120560007	T	TA	.	0/1	8	35	21	60	34	35	0	30	5	16
indels	No	chr1	120567269	TATA	T	.	0/1	4	26	11	40	0	17	11	19	0	3
indels	Yes	chr1	120567627	G	GT	.	0/1	8	27	9	29	10	13	3	20	2	4
indels	No	chr1	120568507	A	AAAC	.	0/1	3	19	6	66	25	25	0	25	2	5
indels	Yes	chr1	120569573	C	CT	.	2018-01-01	20	35	21	54	16	17	13	20	0	2
indels	Yes	chr1	120571063	C	CAT	.	0/1	13	30	12	38	26	26	0	46	2	3
indels	Yes	chr1	120571064	G	GT	.	0/1	8	29	5	36	24	27	4	45	0	3
indels	Yes	chr1	120571528	GA	G	.	0/1	15	28	19	42	21	22	1	20	1	3
indels	Yes	chr1	120571637	G	GA	.	0/1	9	28	12	23	20	21	0	17	1	1
indels	Yes	chr1	120571972	A	AT	.	0/1	8	30	9	47	8	21	0	21	2	6
indels	No	chr1	120571973	T	TA	.	0/1	5	30	11	53	14	23	0	22	2	7
indels	No	chr1	120576447	CACTA	C	.	0/1	5	27	28	56	32	32	0	24	3	13
indels	No	chr1	120576547	T	TA	.	0/1	5	26	20	44	17	17	1	23	2	7
indels	No	chr1	120577239	TAATA	T	.	0/1	3	24	7	9	18	18	0	24	0	1
indels	Yes	chr1	120580296	G	GAA	.	0/1	12	28	22	44	17	20	1	19	0	0
indels	Yes	chr1	120580307	A	AAC	.	0/1	16	28	22	45	16	18	2	19	0	0
indels	No	chr1	120580678	AT	A	.	0/1	6	25	11	40	28	28	0	28	3	4
indels	Yes	chr1	120581608	C	CAT	.	0/1	8	22	0	25	12	12	0	32	0	2
indels	Yes	chr1	120584462	A	AAGAGAG	.	0/1	11	24	2	10	0	14	13	20	2	4
indels	Yes	chr1	120584493	GA	G	.	0/1	16	27	2	16	8	18	0	22	1	5
indels	Yes	chr1	120586487	G	GA	.	0/1	6	23	8	55	22	25	2	13	1	6
indels	Yes	chr1	120588583	T	TATA	.	0/1	6	17	11	46	10	20	0	23	1	9
indels	Yes	chr1	120590662	TA	T	.	0/1	5	17	7	39	21	21	0	44	5	5
indels	Yes	chr1	120591068	C	CTTTTTTTTGTT	.	2018-01-01	10	16	0	13	14	15	14	23	3	4
indels	No	chr1	120591245	A	AT	.	0/1	4	18	0	25	10	11	0	21	0	3
indels	Yes	chr1	120598346	C	CA	.	0/1	4	15	1	27	13	13	0	25	0	5
indels	Yes	chr1	120601779	TA	T	.	0/1	9	17	22	62	14	16	7	27	3	8
indels	No	chr1	120606314	A	AAAAC	.	0/1	1	12	0	23	11	11	0	25	0	2
indels	Yes	chr1	120607458	CA	C	.	0/1	5	15	0	12	18	18	0	23	2	5
indels	No	chr1	120607695	ACC	A	.	0/1	0	15	0	20	20	20	0	30	0	3
indels	Yes	chr1	120608795	TC	T	.	0/1	8	17	3	33	20	20	0	20	1	3
indels	No	chr1	120610087	ATAT	A	.	0/1	2	21	0	28	4	4	0	26	1	4
indels	Yes	chr1	120612040	T	TCCTCCTCCG	.	0/1	10	37	21	65	22	22	1	38	7	14
indels	No	chr1	120612417	AC	A	.	0/1	7	34	2	9	17	17	0	45	0	4
indels	Yes	chr1	120613684	TGG	T	.	0/1	16	43	14	43	18	18	0	29	1	5
indels	No	chr1	120613819	G	GAAA	.	0/1	9	40	14	28	16	16	0	14	1	6
indels	Yes	chr1	120615089	C	CAAAAAAAA	.	2018-01-01	43	47	5	5	7	7	18	18	1	1
indels	Yes	chr1	120619250	C	CAA	.	2018-01-01	69	107	46	54	25	26	19	28	18	18
indels	Yes	chr1	120621508	GACACACAC	G	.	0/1	23	64	2	32	8	10	1	19	0	2
indels	No	chr1	120621551	A	ACAC	.	0/1	12	48	29	36	0	19	10	16	1	2
indels	No	chr11	20621881	GGAAGAAGAAGAAGAA	G	.	2018-01-01	1	14	6	15	3	3	0	1	0	0
indels	No	chr1	120623000	C	CG	.	0/1	11	45	3	15	0	34	24	35	2	6
indels	No	chr1	120623007	C	CT	CCCG	.	2018-02-01	7	37	3	16	0	26	23	chr1	2	4
indels	Yes	chr1	120624264	C	CCT	.	0/1	17	29	16	60	12	21	5	29	5	16
indels	Yes	chr1	120625609	T	TTTG	.	0/1	7	14	13	25	21	21	0	28	3	6
indels	Yes	chr1	120625953	C	CA	.	0/1	12	22	0	30	9	9	0	31	1	3
indels	Yes	chr1	120627349	GT	G	.	0/1	21	33	13	38	24	24	3	44	1	8
indels	Yes	chr1	120639945	AC	A	.	2018-01-01	24	26	2	2	0	0	12	12	2	2
indels	No	chr1	120677297	T	TG	.	0/1	1	27	29	60	3	3	1	18	6	9
indels	Yes	chr1	120687940	C	CA	.	0/1	7	20	12	29	0	0	11	12	5	10
indels	Yes	chr1	120750047	G	GT	.	2018-01-01	10	16	29	29	1	1	15	17	2	2
indels	No evidence	chr1	120762214	CAAAAAAAAAAAAA	C	.	2018-01-01	7	9	0	10	1	1	4	4	0	2
indels	No evidence	chr1	120762989	ACTTGAGC	A	.	0/1	3	8	6	24	5	5	0	17	1	2
indels	No evidence	chr1	120763849	C	CT	.	2018-01-01	3	7	7	8	0	0	6	8	0	0
indels	No evidence	chr1	120765366	AC	A	.	0/1	2	2	1	7	4	4	2	21	0	1
indels	No evidence	chr1	120766220	AT	A	.	0/1	4	5	12	12	0	2	12	12	0	1
indels	No	chr11	20768112	TCACACACA	T	.	0/1	8	36	2	21	0	7	5	5	0	4
indels	No evidence	chr1	120768908	G	GT	.	0/1	4	9	20	23	0	5	14	14	0	6
indels	Yes	chr11	20777411	GTTTTTTTTTTTT	G	.	0/1	30	68	9	17	0	5	2	2	1	2
indels	No evidence	chr1	120778767	G	GA	.	2018-01-01	1	4	0	0	0	0	6	7	0	0
indels	No evidence	chr1	120779530	C	CAAA	.	2018-01-01	2	3	0	0	0	0	7	7	4	4
indels	No evidence	chr1	120811859	G	GATGT	.	0/1	1	2	13	15	0	0	11	12	6	6
indels	No evidence	chr1	120812999	TC	T	2018-01-01	0/1	1	1	11	11	0	0	16	16	5	5
indels	No evidence	chr1	120818266	C	CT	.	2018-01-01	3	3	8	8	0	0	8	8	2	5
indels	No evidence	chr1	120822280	G	GA	2018-01-01	0/1	4	6	4	4	0	0	10	11	7	7
indels	Yes	chr1	120827022	CT	C	.	0/1	9	11	0	0	0	0	7	9	2	3
indels	Yes	chr1	120836932	GT	G	.	0/1	11	12	8	8	0	1	7	7	8	8
indels	No evidence	chr1	120845738	CAATAATAAT	C	.	0/1	4	6	5	5	0	0	0	0	9	9
indels	No evidence	chr1	120845741	TAATAAT	T	.	0/1	6	6	8	8	0	0	0	0	11	11
indels	No evidence	chr1	120846974	CA	C	.	2018-01-01	7	9	1	1	0	0	0	0	6	8
indels	No evidence	chr1	120871905	CT	C	.	2018-01-01	0	0	5	7	0	0	0	0	10	13
indels	No evidence	chr1	120875120	C	CT	.	2018-01-01	0	0	6	7	0	0	0	0	15	17
indels	No evidence	chr1	120877567	G	GT	0/1	2018-01-01	0	1	1	3	0	0	0	0	13	20
indels	No evidence	chr1	120881111	G	GTGT	2018-01-01	0/1	1	1	2	2	0	0	4	4	11	11
indels	No evidence	chr1	120882400	C	CA	.	2018-01-01	0	4	0	0	0	1	1	1	8	8
indels	Yes	chr1	120888066	CT	C	.	2018-01-01	10	15	1	1	0	1	2	2	6	8
indels	Yes	chr1	120890349	CTAAAA	C	.	2018-01-01	16	17	7	7	1	1	3	3	5	5
indels	Yes	chr1	120894171	C	CAA	.	2018-01-01	19	26	0	0	6	6	4	5	9	9
indels	Yes	chr1	120897949	T	TTCCTGAG	.	2018-01-01	18	18	0	0	3	3	2	2	3	3
indels	Yes	chr11	21068223	ATTAT	A	.	2018-01-01	12	35	10	15	5	5	1	4	1	2
indels	No evidence	chr1	121092171	G	GTGGCTAGAAACAAATTTAATTCCTCTAGAGAGGATTTAAATTTGTTTCTAGCCAC	.	0/1	0	3	0	10	0	2	2	4	1	7
indels	Yes	chr11	21396433	CTGTGTGTG	C	.	0/1	14	35	6	19	8	9	0	12	0	0
indels	Yes	chr1	12147131	TATCCATCC	T	.	2018-01-01	29	30	13	13	7	12	1	3	1	8
indels	Yes	chr11	21505536	CATATATATATATATATAT	C	.	2018-01-01	22	41	6	13	4	4	0	4	0	0
indels	No	chr11	2159324	T	TC	.	0/1	4	21	1	38	5	20	4	19	4	22
indels	Yes	chr11	21826923	TATATATATATATATATAAAAATAA	T	0|1	2018-01-01	25	39	11	19	1	4	9	9	0	1
indels	No	chr11	22028546	T	TTATATATATTCATTCCAAGTCAGCTGTAAGCTGTCTTGGAATGAATATATATAAATGTCTATAATATG	.	0/1	1	40	0	22	0	10	2	6	1	2
indels	No	chr11	22438896	GTTCTTTCTTTCT	G	0/1	2018-01-01	6	31	7	14	5	5	0	0	0	2
indels	Yes	chr11	22560549	TGA	T	1|0	2018-01-01	15	36	17	25	2	5	9	11	1	2
indels	No	chr11	22591724	CTG	C	.	0/1	0	25	0	14	5	17	0	9	0	4
indels	Yes	chr11	22591726	G	GTG	.	0/1	22	26	9	14	1	16	7	9	3	4
indels	Yes	chr11	22617825	T	TACACACAC	.	2018-01-01	33	34	13	13	10	11	19	19	2	3
indels	No	chr11	2265162	CGT	C	.	0/1	1	40	0	24	1	16	4	9	0	2
indels	Yes	chr11	22732051	GTGTGTGTC	G	1|0	2018-01-01	29	48	29	29	11	11	11	13	4	4
indels	Yes	chr11	2278032	C	CGTGT	.	0/1	29	36	24	37	1	13	11	12	1	3
indels	Yes	chr11	22785162	TACACACAC	T	.	2018-01-01	43	64	20	20	8	8	5	5	0	0
indels	No	chr11	22796514	AAG	A	.	0/1	1	38	0	20	2	5	1	11	0	1
indels	Yes	chr11	22920993	CTATATATATATA	C	.	0/1	14	34	10	19	0	7	3	4	1	4
indels	Yes	chr11	23000533	T	TC	.	2018-01-01	21	32	25	25	6	8	3	3	8	9
indels	Yes	chr11	23066811	GATATATATAT	G	.	0/1	13	47	6	17	8	10	0	8	1	2
indels	Yes	chr11	23115993	A	ATG	0/1	2018-01-01	41	43	21	21	6	6	9	9	3	3
indels	Yes	chr11	23115994	T	TG	0/1	2018-01-01	39	43	20	21	6	6	9	9	3	3
indels	Yes	chr11	23215079	ATATTT	A	.	0/1	22	36	7	24	8	9	0	7	0	1
indels	No	chr11	23215866	G	GT	.	0/1	6	24	7	9	1	13	8	8	0	0
indels	Yes	chr11	23216954	C	CCACACACACACACACACACA	.	2018-01-01	30	30	8	9	8	9	16	16	0	0
indels	Yes	chr11	2327276	C	CTGTGTG	.	2018-01-01	18	18	29	29	14	14	15	15	11	11
indels	No	chr11	23315009	TAC	T	.	2018-01-01	3	37	7	12	0	10	12	12	1	2
indels	Yes	chr11	23330753	C	CATATAT	.	2018-01-01	37	38	16	16	3	3	12	12	2	2
indels	Yes	chr11	23376895	A	ATCTCTCTCTCTC	.	0/1	22	45	13	31	0	6	11	11	0	1
indels	Yes	chr11	23397860	TATACACAC	T	1|0	2018-01-01	24	48	17	20	8	11	17	18	3	5
indels	Yes	chr11	23411460	TTTA	T	.	2018-01-01	13	15	11	12	4	4	5	5	1	1
indels	No evidence	chr1	12359	TGGAG	T	.	0/1	0	2	0	0	2	2	0	6	0	1
indels	Yes	chr11	23609787	T	TGTGAGA	.	2018-01-01	57	58	12	12	14	14	19	19	7	7
indels	No	chr11	23673278	AAG	A	.	2018-01-01	0	36	0	25	2	12	1	8	1	4
indels	No	chr11	23673282	A	ACT	.	2018-01-01	2	36	0	25	2	12	3	10	1	4
indels	Yes	chr11	23717160	T	TTG	.	2018-01-01	52	53	17	17	8	8	7	7	4	4
indels	Yes	chr11	23856776	GTATATATATATATATA	G	.	0/1	19	46	11	22	4	4	0	5	6	12
indels	Yes	chr1	12388602	CT	C	.	0/1	20	40	0	18	1	3	0	0	5	22
indels	Yes	chr11	2392696	TACACACAC	T	.	2018-01-01	14	23	25	25	2	2	7	7	3	3
indels	Yes	chr11	23928513	AT	A	.	0/1	18	37	0	27	3	3	2	11	3	3
indels	No	chr11	24028372	CA	C	.	0/1	11	47	0	27	0	5	0	14	5	13
indels	Yes	chr11	24043275	AT	A	.	0/1	17	35	6	17	0	9	4	4	0	1
indels	Yes	chr11	24306945	GCACA	G	.	0/1	11	33	12	19	2	6	8	8	0	1
indels	Yes	chr1	12461017	G	GCACACACA	.	2018-01-01	36	39	21	21	0	0	0	0	12	12
indels	No	chr1	12462283	CTTTG	C	.	0/1	0	33	0	29	1	1	0	4	6	24
indels	No	chr1	12462288	T	TACAA	.	0/1	1	33	0	31	1	1	0	4	4	26
indels	Yes	chr11	24651095	C	CAT	.	2018-01-01	36	38	16	16	9	11	8	11	1	1
indels	No	chr11	24807095	T	TTC	.	0/1	6	31	0	22	4	9	2	19	0	9
indels	No	chr11	24830782	AT	A	.	0/1	2	53	0	31	0	16	5	5	6	10
indels	Yes	chr11	25006095	T	TATATATATATATATATAA	.	2018-01-01	29	30	17	17	7	7	5	5	4	5
indels	No	chr11	25030709	A	AGGAGGGAGGAACAGAGGACATAGCAATGTCCTCTGTTCCTCCCTCCTCAAAATTGTT	.	0/1	0	30	0	20	0	7	2	2	0	3
indels	Yes	chr11	25407097	CATATATATATATATATATATAT	C	.	0/1	22	51	4	15	6	6	0	3	0	0
indels	Yes	chr11	25425227	CATAT	C	.	2018-01-01	16	43	10	22	2	4	0	4	3	3
indels	Yes	chr11	25446778	T	TA	.	2018-01-01	32	34	0	0	1	1	2	2	0	0
indels	Yes	chr11	25479111	T	TGA	.	2018-01-01	50	50	14	14	4	4	9	9	0	0
indels	Yes	chr11	25544308	GTGTT	G	0|1	2018-01-01	37	38	22	22	10	10	6	6	4	4
indels	Yes	chr11	25558840	ATATATGTGTGTG	A	1|0	2018-01-01	36	42	21	21	14	14	11	12	4	4
indels	Yes	chr11	25625153	ATAT	A	.	0/1	11	39	6	15	0	4	3	3	0	0
indels	No	chr11	25645990	A	ACAAAATTTAAAATGTGGAACAACTTTATATTTTAAACTTTGTCCAATGTGTAAGGG	.	0/1	0	44	0	28	3	14	1	13	0	4
indels	Yes	chr11	25701624	C	CCACACACACACACACACACA	.	2018-01-01	30	32	16	16	9	9	7	7	4	4
indels	Yes	chr11	25749675	T	TTCTCTCTCTCTCTC	.	2018-01-01	42	42	23	23	11	11	12	12	4	4
indels	Yes	chr11	25790164	GGTGTGTGTGTGTGTGTGT	G	.	0/1	18	36	7	21	0	7	9	9	1	2
indels	Yes	chr11	25852124	TTGTGTGTGTG	T	.	0/1	11	33	10	17	7	9	1	5	0	0
indels	Yes	chr11	25926560	T	TTG	.	0/1	42	46	19	27	2	6	9	9	3	3
indels	Yes	chr11	25967627	G	GCA	.	2018-01-01	31	35	24	24	7	8	9	12	1	1
indels	Yes	chr11	26207062	TTCTCTCTCTCTC	T	.	0/1	15	37	8	16	8	8	0	7	0	3
indels	Yes	chr11	26256549	A	AAGAGAGAGAGAGAGAGAGAG	.	0/1	15	28	10	21	6	6	1	9	2	2
indels	Yes	chr11	26268003	TTATATA	T	.	0/1	10	29	11	18	6	6	0	2	0	0
indels	No	chr11	26270997	C	CAA	.	0/1	3	51	0	30	4	16	2	16	0	1
indels	Yes	chr11	26273569	G	GT	.	0/1	11	38	20	32	8	9	1	6	1	3
indels	Yes	chr11	26295179	GCACACACA	G	.	2018-01-01	18	48	19	29	11	12	0	13	3	3
indels	Yes	chr11	26436603	ATGTGTG	A	.	0/1	9	33	9	17	1	16	13	14	2	4
indels	Yes	chr11	26530652	C	CTA	.	0/1	36	36	21	21	9	10	9	11	2	4
indels	Yes	chr11	26586231	C	CAT	.	0/1	24	33	6	12	14	14	1	8	2	3
indels	Yes	chr11	26621788	T	TTCCTC	.	0/1	31	43	11	13	10	10	2	6	2	2
indels	Yes	chr11	26848726	A	AAAAT	0/1	2018-01-01	23	43	9	16	1	2	5	7	7	7
indels	Yes	chr1	12687255	G	GA	.	2018-01-01	31	48	26	27	6	6	14	14	0	0
indels	Yes	chr1	12698833	CCTTTCTTTCTTTCTTT	C	.	2018-01-01	8	11	8	14	0	2	4	4	1	1
indels	No	chr11	27192097	TTTATTA	T	.	0/1	4	25	18	28	6	6	0	2	1	3
indels	Yes	chr11	27219237	TACACACAC	T	.	0/1	11	36	6	17	1	9	7	7	1	3
indels	Yes	chr11	2729944	T	TG	.	0/1	6	23	14	29	1	11	7	7	2	2
indels	No	chr11	27338122	A	AAAAATTAGCCATGCCCGGCTAATTTTTGTATTTTTT	.	0/1	0	42	0	19	0	3	1	10	1	2
indels	Yes	chr11	27459245	T	TGTGTGTGTG	.	0/1	31	49	7	24	0	20	6	13	4	10
indels	Yes	chr11	27505323	AAAACAAAC	A	.	0/1	22	34	12	19	1	13	11	11	3	3
[truncated: 110,276 more rows]
