# Supplementary material for: Resolving the full spectrum of human genome variation using Linked-Reads
Source: HighWire-hosted journal article supplement (doi:10.1101/gr.234443.118), 2019-03-20
Supplement: Supplemental_longranger-2.2.zip [file coreos-meetup-2016-01-27.pdf › lr2.2-public/lib/go/src/code.google.com/vitess/docs/resources/coreos-meetup-2016-01-27.pdf]

# YouTube Vitess

## Anatomy of a Distributed Database on Kubernetes

CoreOS Meetup

January 27, 2016

Anthony Yeh, Software Engineer, YouTube

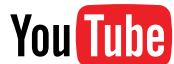

<http://vitess.io/>

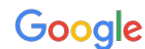

# Outline

1. Vitess
2. Kubernetes
3. Databases on Kubernetes
4. Vitess on Kubernetes

# Vitess

# Vitess 1.0

- YouTube is a MySQL app
- Vitess started in YouTube data centers
  - Connection-pooling proxy
- Early adopter of Go (golang.org)
  - First commit (in original repo) in 2010
  - 2 years before Go 1.0
  - Cheap connections, goroutines
- In production at YouTube since 2011

[golang.org](https://golang.org)

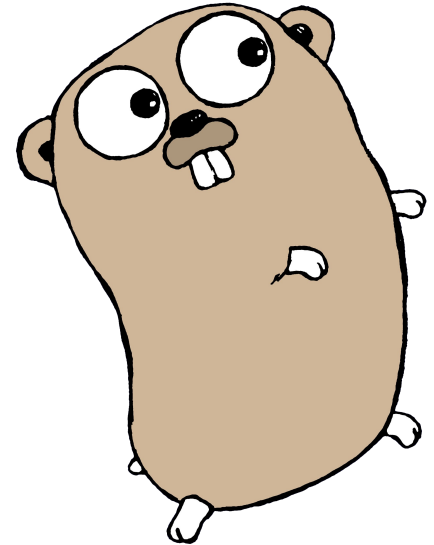

*Renee French  
(not pictured)*

# Vitess 1.5

- YouTube moved into Borg<sup>[1]</sup>
  - Google MySQL
- Adapted Vitess to Borg environment
  - Dynamically scheduled container cluster
- Over time, Vitess evolved within Borg
  - Database protection
  - Query rewriting/blacklisting
  - Row-based cache
  - Shard routing
  - Cluster management
  - Monitoring

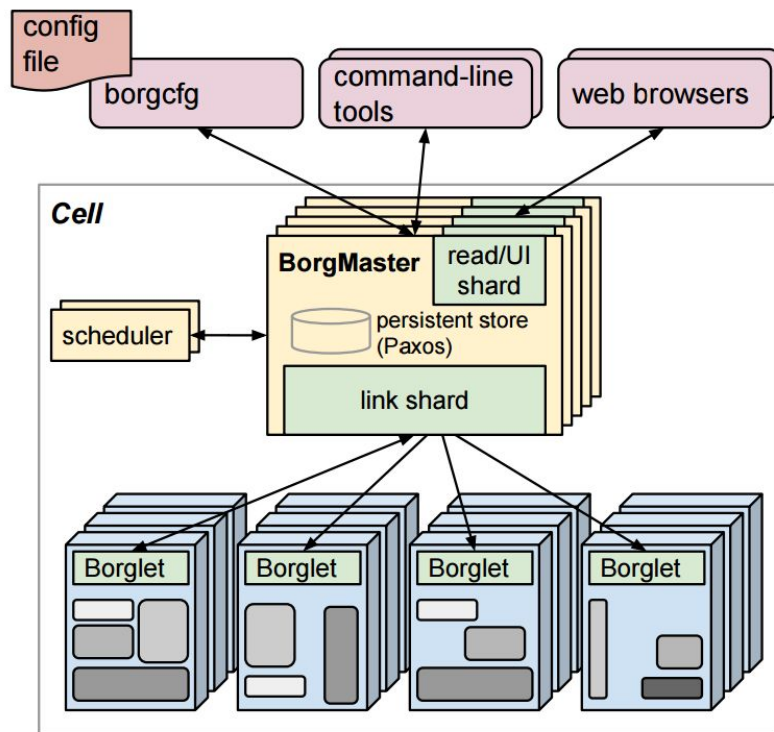

[1] <http://research.google.com/pubs/pub43438.html>

# Growing with YouTube

- YouTube stats<sup>[1]</sup>
  - >1B users
  - 400 hrs/min of new videos (24K s/s)
  - 80% of views from outside U.S.
- Schema constantly evolving
  - Content ID, channel admin, live streams, video editing, music
- Developed live resharing

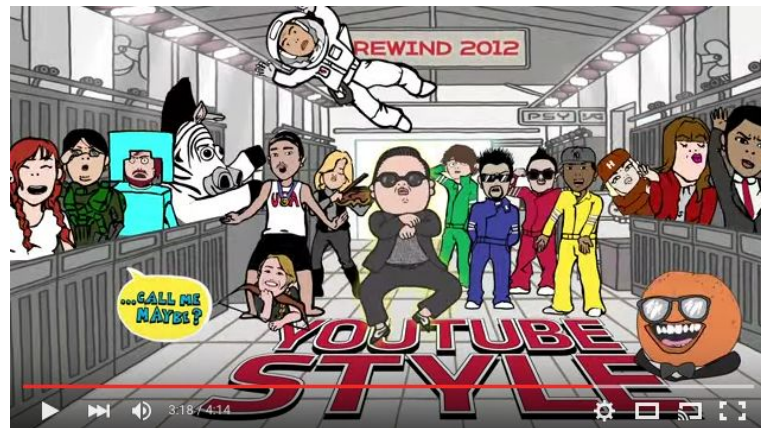

[1] [youtube.com/yt/press/statistics.html](https://youtube.com/yt/press/statistics.html)

# Vitess 2.0

## Vitess in 2014

- Worked great in YouTube, but outside...
  - Users can't get past build step
  - Custom patched MySQL
  - No docs for setting up a deployment
  - Only client is Python
- Along comes Kubernetes
  - Like open-source Borg

## Vitess in 2015

- BYO MySQL 5.6 or MariaDB 10
- Docker images
- Out-of-the-box deployment config
  - Anywhere Kubernetes runs (AWS, GCP, rackspace, ...)
- Step-by-step guides
- Clients in Python, PHP, Java, Go

## Vitess in 2016...

- Moving toward drop-in MySQL compatibility (Vindexes, drivers)

# Vitess Terminology

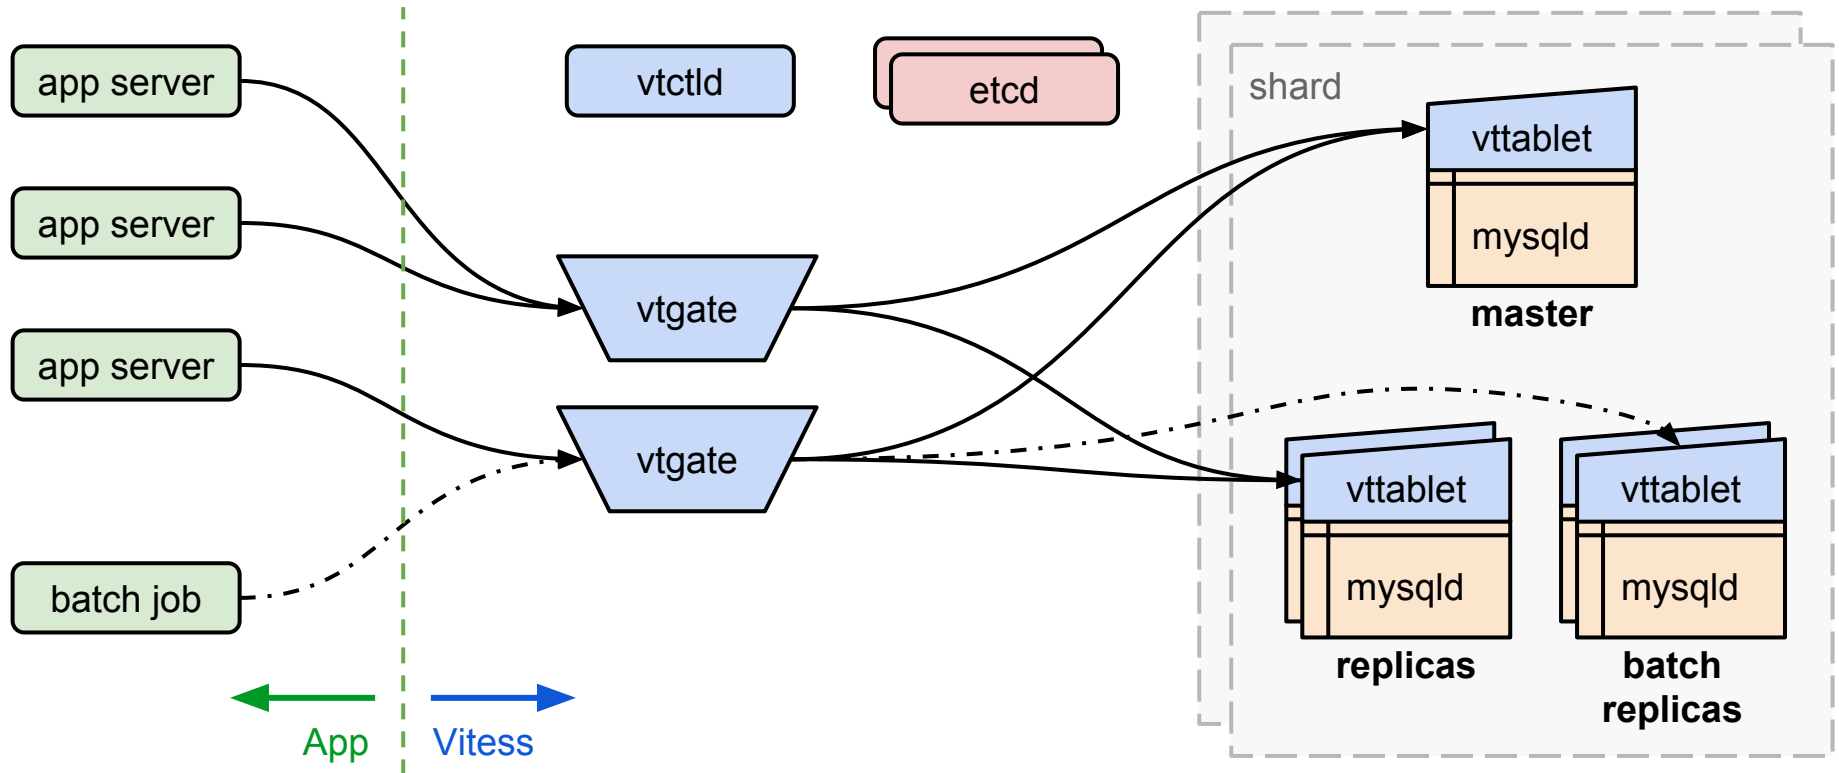



# Kubernetes

# Kubernetes (k8s)

- Provides glue for distributed apps
  - Dynamic scheduling
  - Declarative deployment config
  - Service discovery
  - High-availability replica pools
  - Rolling updates
  - Component grouping/metadata
- Abstracts cloud-platform-specific pieces
  - VM instance creation and config
  - Networking config
  - External load balancers
  - Persistent storage volumes (PD, EBS)

kubernetes.io

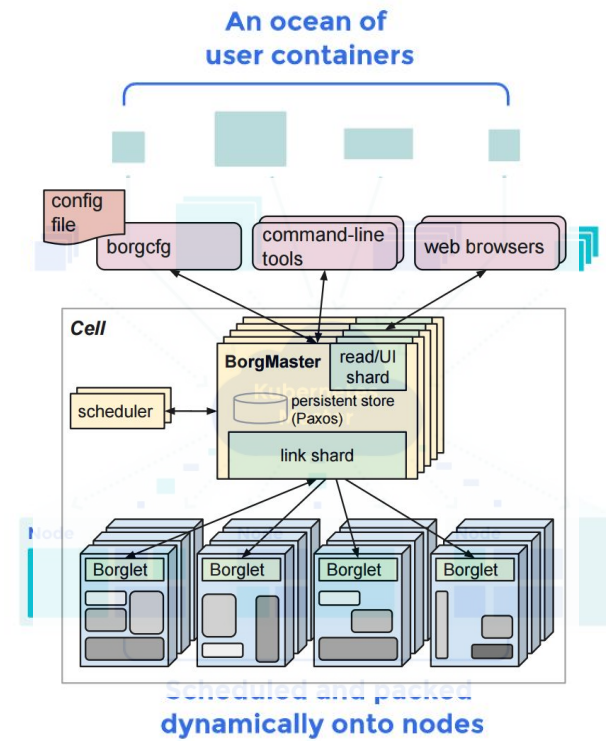

# Kubernetes Terminology

- **Node** - Physical machine or VM, member of k8s cluster
- **Container** - Docker, rkt
- **Pod** - Scheduling unit (group of containers)
- **Volume** - Storage mounted into pods/containers
- **Replication Controller** - Ensures a pool of N copies of a pod template.
- **Service** - Discovery + LB Proxy based on Labels.

# Databases on Kubernetes

# Pets vs. Cattle<sup>[1]</sup>

| Your servers might be <b>pets</b> if...                | Your servers might be <b>cattle</b> if...                      |
|--------------------------------------------------------|----------------------------------------------------------------|
| You can log into them by hostname or IP.               | You know only that a bunch of them are out there, somewhere.   |
| You load data onto them and tell them what to do.      | They go off and join the herd without being told to.           |
| You try to fix them when they go down.                 | You wait for others to take over their jobs when they go down. |
| Your app knows which servers to send which queries to. | Your app throws queries over a magic wall and results appear.  |
| You know when your last master failover was.           | You have a monitoring graph of failovers per day.              |

[1] Noah Slater, [blog.engineyard.com/2014/pets-vs-cattle](http://blog.engineyard.com/2014/pets-vs-cattle)

# Cattle Databases

- Why do we want to run databases in Kubernetes?
  - It's how we run them in Google (Borg)
  - Resource utilization
  - Horizontal scalability
  - Cluster management
- Why is it hard?
  - Make 1000s of servers look like 1 DB to the app
  - Pods are, by design, not durable
  - Durability comes only from pools of replicas

# Where do you put data in Kubernetes?

- emptyDir
  - Local, ephemeral
- hostPath
  - Local, node-specific
- gcePersistentDisk,  
awsElasticBlockStore
  - Manually create one for every pod
- Persistent Volumes
  - PV : EBS :: node : VM
  - Pool of PVs
  - PV Claim (PVC)
  - PVC : PV :: pod : node
  - Compute and storage decoupled

# Pet Set Proposal [1]

## Replication Controller

- Ensure there are N **identical** copies of this pod template.

## Pet Set

- Ensure there are N **similar** copies of this pod template, such that:
  - At most 1 has ID 0
  - At most 1 has ID 1
  - ...
  - (at any point in time)

[1] <https://github.com/kubernetes/kubernetes/pull/18016>



# Vitess on Kubernetes

[vitess.io/getting-started](https://vitess.io/getting-started)

# Vitess Terminology Review

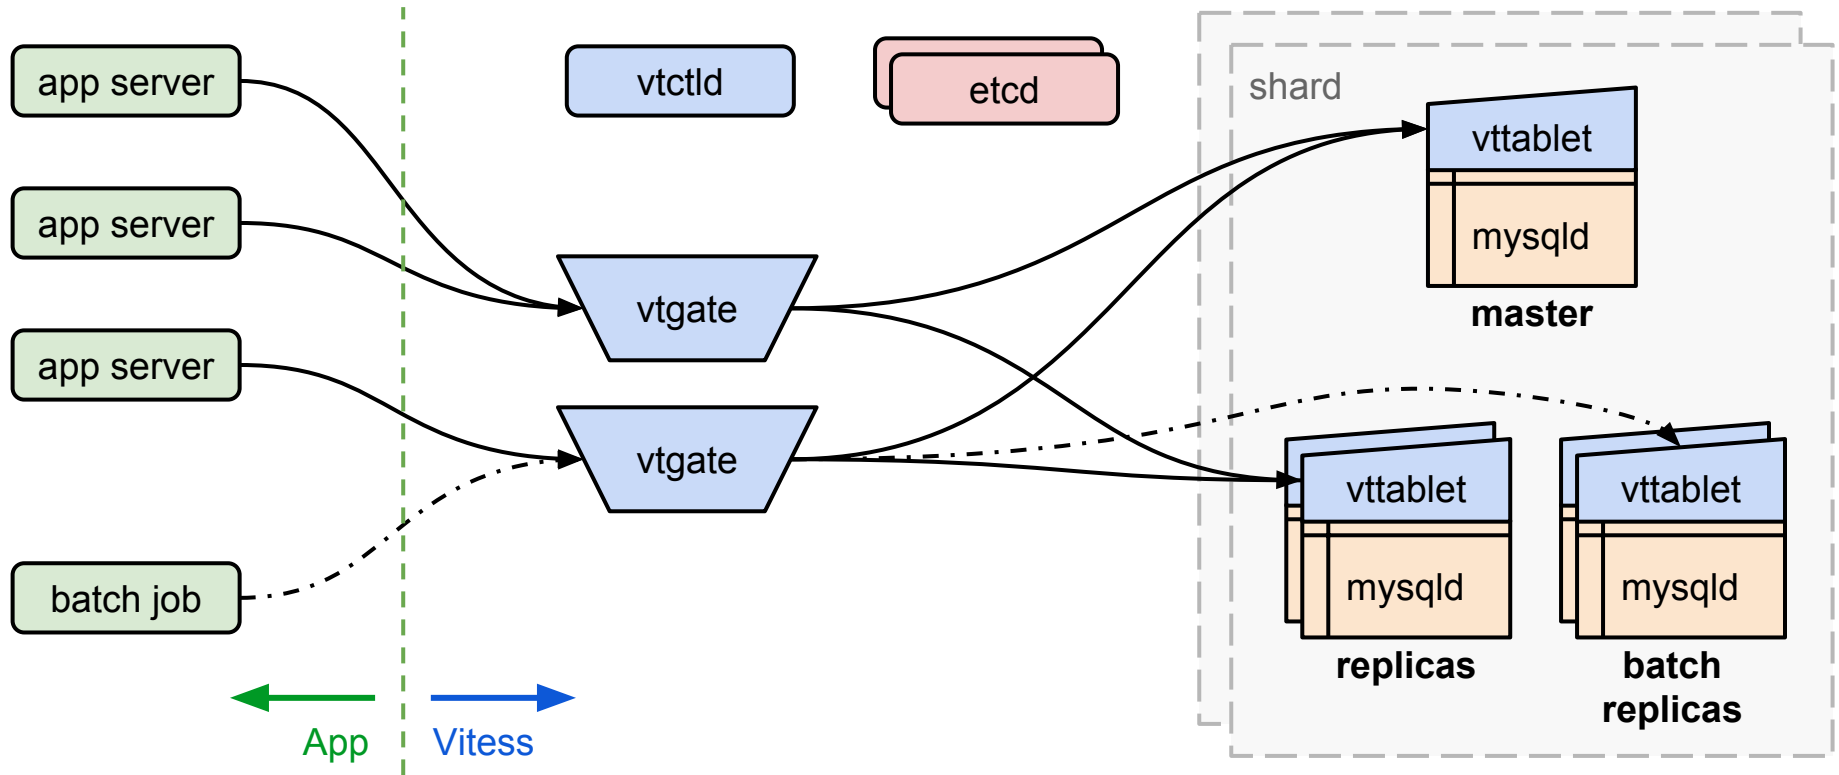

# etcd (distributed config)

- Replication Controller
- Crazy bootstrap script
  - ETCD\_DISCOVERY\_SRV
  - Make identical replicas do different things (needs PetSet!)
- Service: etcd-global
- DNS: http://etcd-global:4001

```
ipaddr=$(hostname -i)
peer_url="http://$ipaddr:7001"
client_url="http://$ipaddr:4001"

export ETCD_NAME=$HOSTNAME
export ETCD_DATA_DIR=/vt/vdataroot/etcd-SETCD_NAME
export ETCD_STRICT_RECONFIG_CHECK=true
export ETCD_ADVERTISE_CLIENT_URLS=$client_url
export ETCD_INITIAL_ADVERTISE_PEER_URLS=$peer_url
export ETCD_LISTEN_CLIENT_URLS=$client_url
export ETCD_LISTEN_PEER_URLS=$peer_url

if [ -d $ETCD_DATA_DIR ]; then
  # We've been restarted with an intact datadir.
  # Just run without trying to do any bootstrapping.
  echo "Resuming with existing data dir: $ETCD_DATA_DIR"
else
  # This is the first run for this member.

  # If there's already a functioning cluster, join it.
  echo "Checking for existing cluster by trying to join..."
  if result=$(etcdctl -c http://etcd-{{cell}}:4001 member add SETCD_NAME $peer_url); then
    [[ "$result" =~ ETCD_INITIAL_CLUSTER="{[\w\+]*}" ]] && \
    export ETCD_INITIAL_CLUSTER="$BASH_REMATCH[1]"
    export ETCD_INITIAL_CLUSTER_STATE=existing
    echo "Joining existing cluster: $ETCD_INITIAL_CLUSTER"
  else
    # Join failed. Assume we're trying to bootstrap.

    # First register with global topo, if we aren't global.
    if [ "{{cell}}" != "global" ]; then
      echo "Registering cell '{{cell}}' with global etcd..."
      until etcdctl -c "http://etcd-global:4001" \
        set "/vt/cell/{{cell}}" "http://etcd-{{cell}}:4001"; do
        echo "[${date}] waiting for global etcd to register cell '{{cell}}'"
        sleep 1
      done
    fi

    # Use DNS to bootstrap.

    # First wait for the desired number of replicas to show up.
    echo "Waiting for {{replicas}} replicas in SRV record for etcd-{{cell}}-srv..."
    until [ $(getsrv etcd-server top etcd-{{cell}}-srv | wc -l) -eq {{replicas}} ]; do
      echo "[${date}] waiting for {{replicas}} entries in SRV record for etcd-{{cell}}-srv"
      sleep 1
    done

    export ETCD_DISCOVERY_SRV=etcd-{{cell}}-srv
    echo "Bootstrapping with DNS discovery:"
    getsrv etcd-server top etcd-{{cell}}-srv
  fi
fi

# We've set up the env as we want it. Now run.
etcd
```

[github.com/youtube/vitess/tree/master/examples/kubernetes](https://github.com/youtube/vitess/tree/master/examples/kubernetes)

# vtctld (admin interface)

- Replication Controller
- Service
- kubectl proxy
  - Web UI
- kubectl port-forward
  - CLI (gRPC.io)

The screenshot shows the Vitess admin interface. The top navigation bar includes 'Vitesse' and 'Shard Status'. A left sidebar contains navigation options: DASHBOARD, TOPOLOGY BROWSER, SCHEMA MANAGER, and ROUTING INDEXES. The main content area is titled 'Shard Status' and displays the following information:

**Shard Record**

|                |                 |
|----------------|-----------------|
| Keyspace/Shard | test_keyspace/0 |
| Master Tablet  | test-100        |

**Tablets (by cell)**

TEST

| Tablet Name        | Host                              | IP Address         | Seconds Behind Master | Health Error | STATUS |
|--------------------|-----------------------------------|--------------------|-----------------------|--------------|--------|
| test-100 [master]  | enisoc0.mtv.corp.google.com:15100 | 172.27.74.97:15100 | 0                     | None         | STATUS |
| test-101 [replica] | enisoc0.mtv.corp.google.com:15101 | 172.27.74.97:15101 | 0                     | None         | STATUS |
| test-102 [replica] | enisoc0.mtv.corp.google.com:15102 | 172.27.74.97:15102 | 0                     | None         | STATUS |

# vtgate (client entrypoint)

- Replication Controller
- Service
- DNS

```
conn = vtgatev2.connect({'vt': ['vtgate:15001']}, timeout)
```

# vtablet (the hard part)

- Pod
  - vtablet container
  - mysqld container
- No RC yet...
  - Containers restart
  - But pods don't get rescheduled
- emptyDir
  - Shared by both containers
  - It's... an empty dir.
  - Where does the data come from?
- Vitess Backup/Restore
  - Pulls latest snapshot from GCS/NFS

# Sneak Peeks

# Toward Drop-in Sharding (Vindexes)

- [vitess.io/doc/VTGateV3Features](http://vitess.io/doc/VTGateV3Features)
- VTGate parses and understands queries.

```
def my_hash(user_id):  
    m = hashlib.md5()  
    m.update(uint64.pack(user_id))  
    return m.digest()[:8]
```

```
cursor = conn.cursor('test_keyspace', 'replica', keyspace_ids=[my_hash(user_id)])  
cursor.execute(  
    'SELECT message FROM messages WHERE user_id=%(user_id)s ORDER BY time_created_ns',  
    {'user_id': user_id})  
return [row[0] for row in cursor.fetchall()]
```



# Automated Master Election (Orchestrator)

- Orchestrator
  - by Shlomi Noach (GitHub, formerly Booking.com)
  - [github.com/outbrain/orchestrator](https://github.com/outbrain/orchestrator)

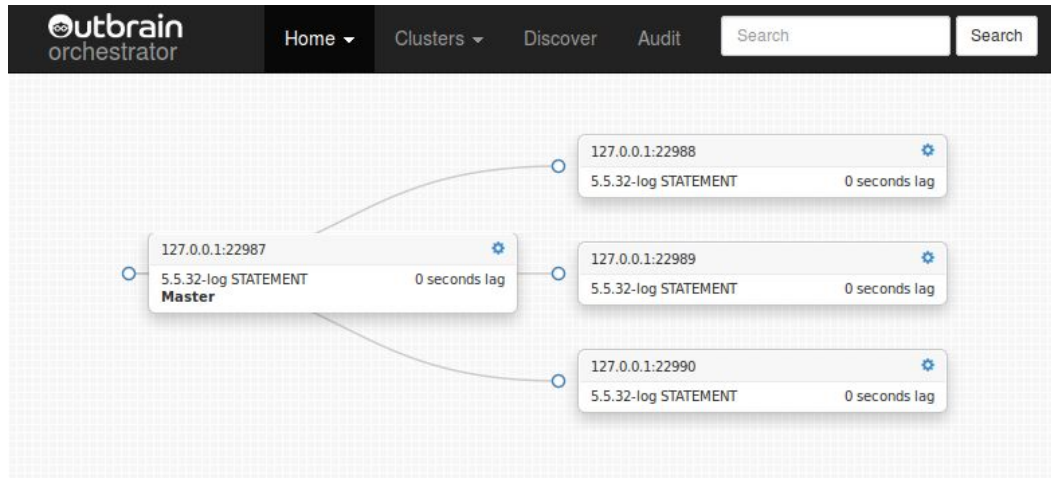

# Resources

## Try Vitess

[vitess.io/getting-started](https://vitess.io/getting-started)

[vitess.io/user-guide/sharding-kubernetes.html](https://vitess.io/user-guide/sharding-kubernetes.html)

## Contribute

[github.com/youtube/vitess](https://github.com/youtube/vitess)

## Contact Us

[vitess@googlegroups.com](mailto:vitess@googlegroups.com)

## Get Updates

[groups.google.com/d/forum/vitess-announce](https://groups.google.com/d/forum/vitess-announce)

## Cloud Native Computing Foundation

[cncf.io](https://cncf.io)

## Kubernetes

[kubernetes.io](https://kubernetes.io)
