# Supplementary material for: Resolving the full spectrum of human genome variation using Linked-Reads
Source: HighWire-hosted journal article supplement (doi:10.1101/gr.234443.118), 2019-03-20
Supplement: Supplemental_longranger-2.2.zip [file openworld-2015-vitess.pdf › lr2.2-public/lib/go/src/code.google.com/vitess/docs/resources/openworld-2015-vitess.pdf]

# YouTube Vitess

## Cloud-Native MySQL

Oracle OpenWorld Conference

October 26, 2015

Anthony Yeh, Software Engineer, YouTube

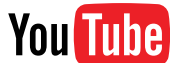

<http://vitess.io/>

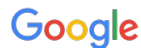

# Spoiler Alert

# Spoilers

1. History of Vitess
2. What is Cloud-Native Computing?
3. What is Cloud-Native MySQL?
4. Vitess Architecture
5. Transparent Live Resharding
6. Example Resharding Workflow
7. Cloud Scaling Benchmarks
8. Vitess Roadmap
9. It was all a dream

# Histoire de Vitess

# Vitess 1.0

golang.org

- YouTube is a MySQL app
- Vitess started in YouTube data centers
  - Connection-pooling proxy
- Early adopter of Go (golang.org)
  - First commit (in original repo) in 2010
  - 2 years before Go 1.0
  - Cheap connections, goroutines
- In production at YouTube since 2011

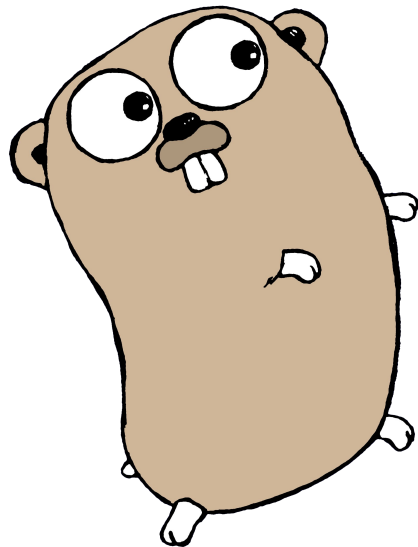

# Vitess 1.5

- YouTube moved into Borg<sup>[1]</sup>
  - Google MySQL
- Adapted Vitess to Borg environment
  - Dynamically scheduled container cluster
- Over time, Vitess evolved within Borg
  - Database protection
  - Query rewriting/blacklisting
  - Row-based cache
  - Shard routing
  - Cluster management
  - Monitoring

[1] <http://research.google.com/pubs/pub43438.html>

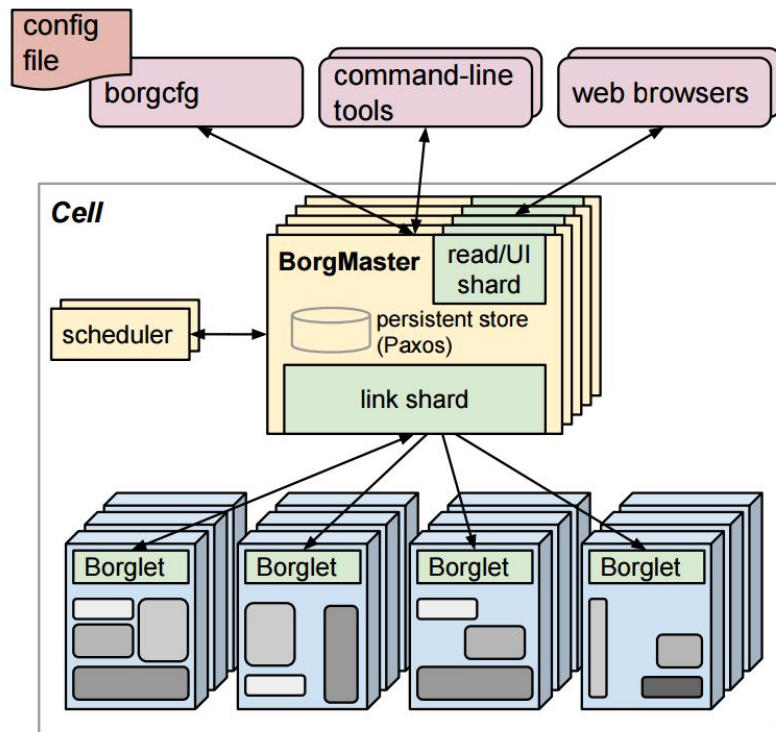

# Growing with YouTube

- YouTube stats<sup>[1]</sup>
  - >1B users
  - 400 hrs/min of new videos (24K s/s)
  - 80% of views from outside U.S.
- Schema constantly evolving
  - Content ID, channel admin, live streams, video editing, music
- Developed live resharing

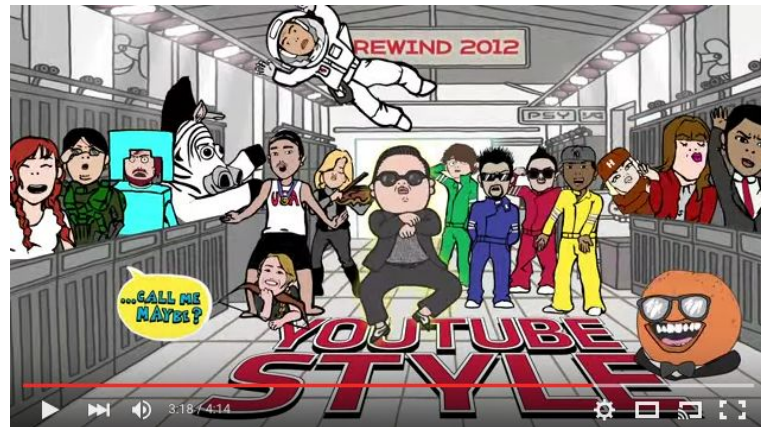

[1] [youtube.com/yt/press/statistics.html](https://youtube.com/yt/press/statistics.html)

# Vitess 2.0

## Vitess in 2014

- Worked great in YouTube, but outside...
  - Users can't get past build step
  - Custom patched MySQL
  - No docs for setting up a deployment
- Along comes Kubernetes
  - Like open-source Borg

## Vitess in 2015

- Bring-your-own MySQL 5.6
- Docker images
- Out-of-the-box deployment config
  - Runs on any cloud platform supported by Kubernetes (AWS, Azure, GCP, ...)
- Lots more documentation
- Step-by-step guides



# Cloud-Native Computing

# Cloud Native Computing Foundation (cncf.io)

## Distributed systems paradigm

- Container packaged
  - Dependency management
  - Resource isolation
- Dynamically scheduled
  - Increase utilization
  - Simplify operations
- Microservices-oriented
  - Distributed applications
  - Service endpoints

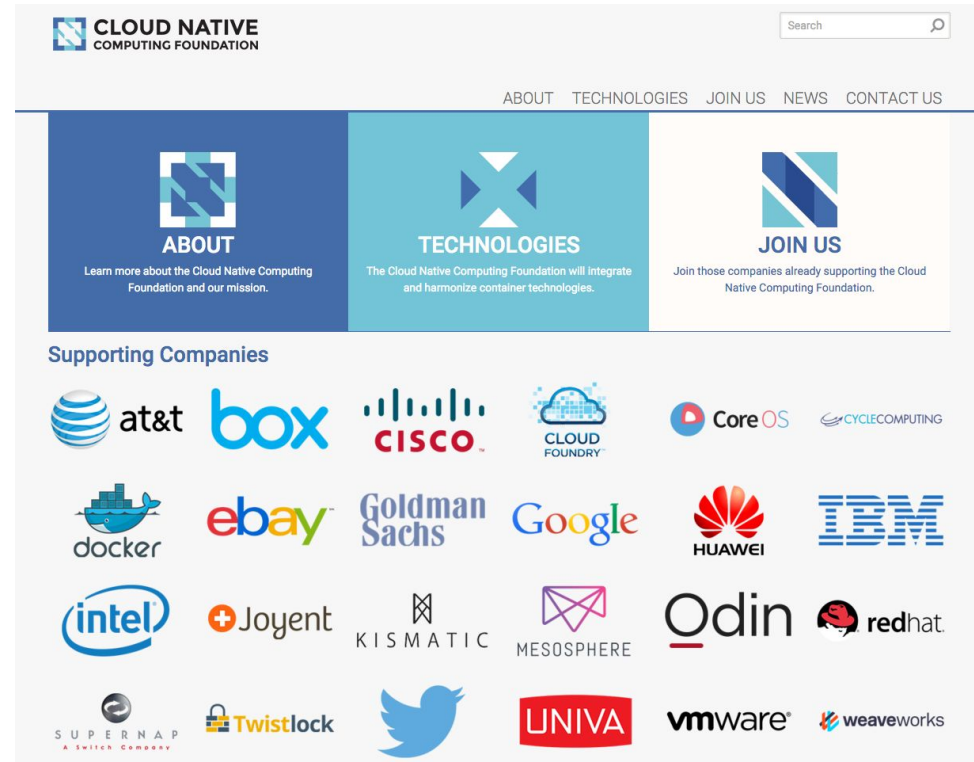

# Kubernetes (κυβερνήτης)

kubernetes.io

- Provides glue for distributed apps
  - Dynamic scheduling
  - Declarative deployment config
  - Service discovery
  - High-availability replica pools
  - Rolling updates
  - Component grouping/metadata
- Abstracts cloud-platform-specific pieces
  - VM instance creation and config
  - Networking config
  - External load balancers
  - Persistent storage volumes (PD, EBS)

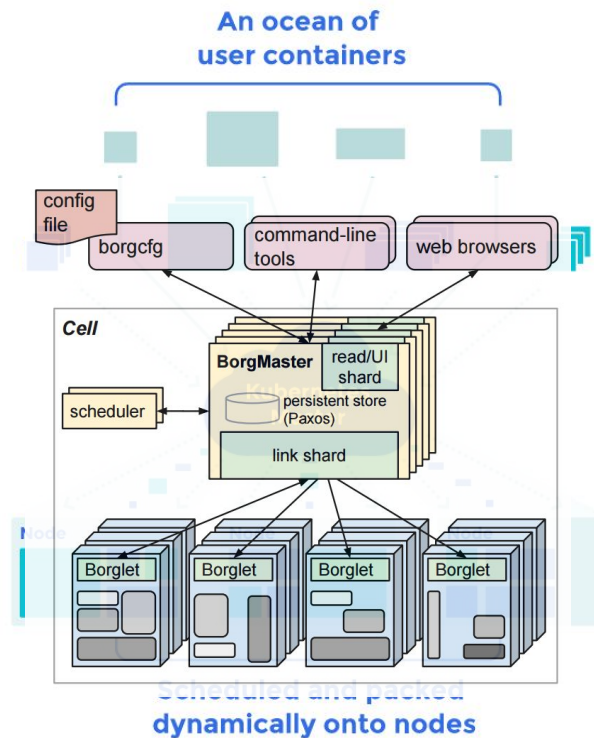

# Cloud-Native MySQL

# Pets vs. Cattle<sup>[1]</sup>

| Your servers might be <b>pets</b> if...                | Your servers might be <b>cattle</b> if...                      |
|--------------------------------------------------------|----------------------------------------------------------------|
| You can log into them by hostname or IP.               | You know only that a bunch of them are out there, somewhere.   |
| You load data onto them and tell them what to do.      | They go off and join the herd without being told to.           |
| You try to fix them when they go down.                 | You wait for others to take over their jobs when they go down. |
| Your app knows which servers to send which queries to. | Your app throws queries over a magic wall and results appear.  |
| You know when your last master failover was.           | You have a monitoring graph of failovers per day.              |

[1] Noah Slater, [blog.engineyard.com/2014/pets-vs-cattle](http://blog.engineyard.com/2014/pets-vs-cattle)

# Dynamic Scale-Out

- Scale-out by adding more cattle to the herd

```
$ kubectl create -f vtablelet.yaml
```

- Dynamic scheduling means you don't worry about...
  - What server is this going to be launched on?
  - How is it going to get a snapshot of existing data?
  - How is it going to find and connect to the master?
  - How are app servers going to find out it exists?
- With live resharding, it even works for scaling master traffic.

# Query Routing as a Service

- Separation of concerns
  - App doesn't know anything about cluster topology
  - MySQL doesn't know it's inside Kubernetes
  - Vitess connects everything
- Distributed Vitess components
  - Use service discovery to find each other
  - Communicate over defined RPC APIs

# Vitess Architecture



# Vitess Components

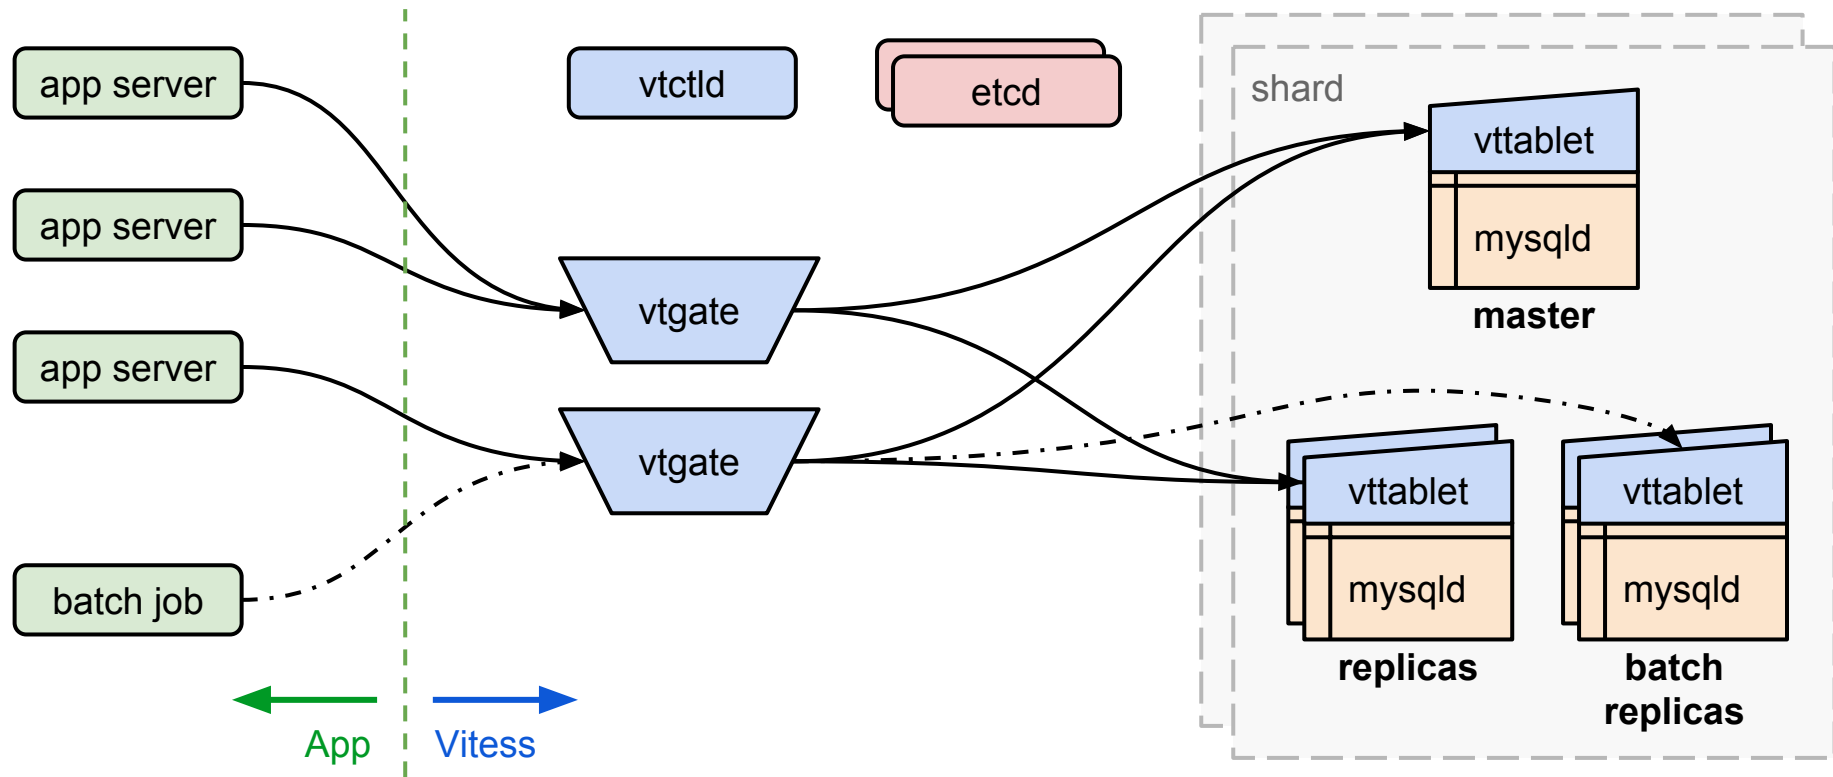

# Vitess Concepts

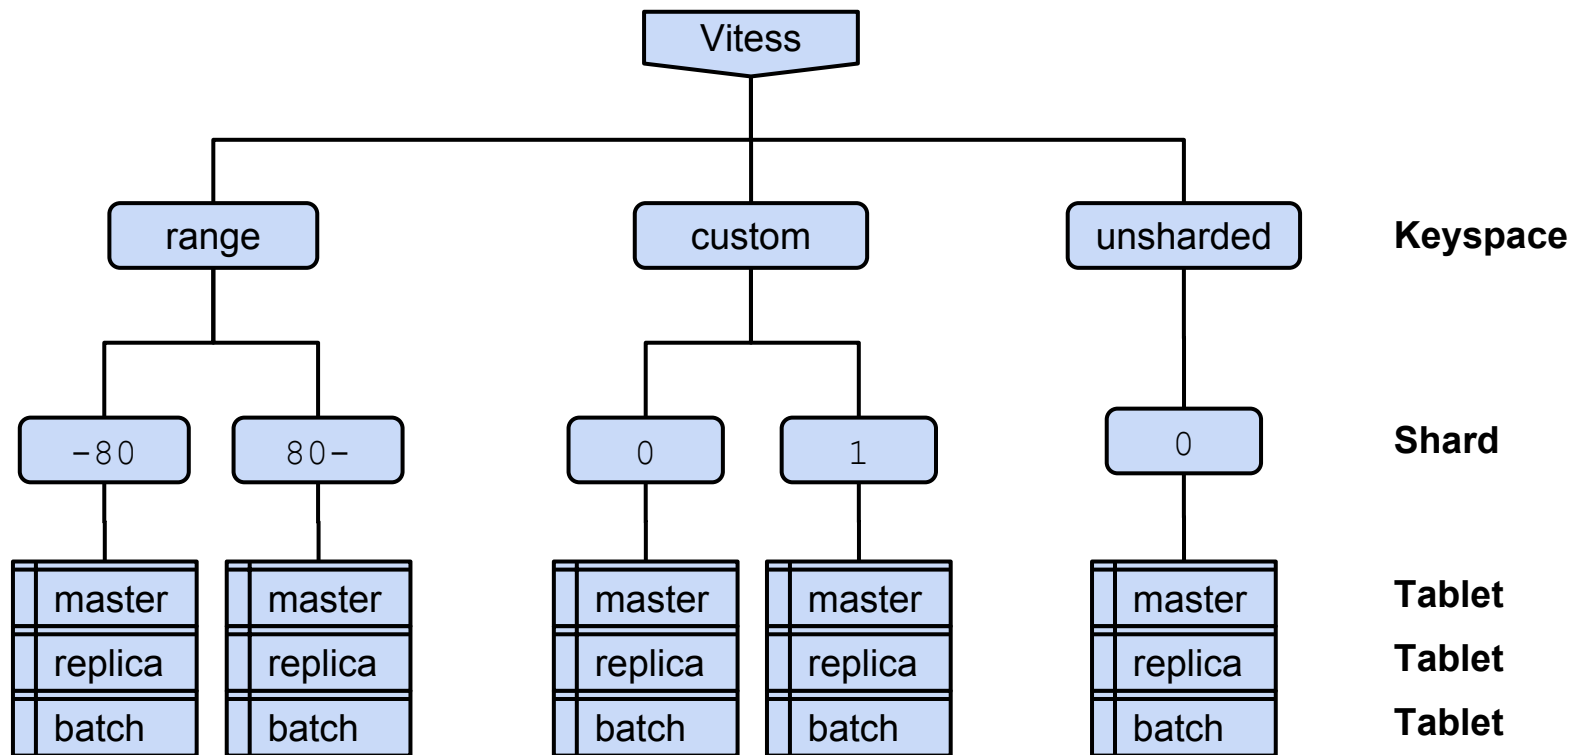

# Range-Based Sharding

## Basic Hashing

User ID

Shard

...

1234

1235

1236

...

0

1

2

## Consistent Hashing

User ID

Keyspace ID

Shard

...

1234

1235

1236

...

...

7F FF FF FF

80 00 00 00

80 00 00 01

...

-40

40-80

80-

```
cursor = conn.cursor('test_keyspace', 'replica', keyspace_ids=[my_hash(user_id)])
cursor.execute(
    'SELECT message FROM messages WHERE user_id=%(user_id)s ORDER BY time_created_ns',
    {'user_id': user_id})
return [row[0] for row in cursor.fetchall()]
```

# Transparent Live Resharding

# Vitess Resharding

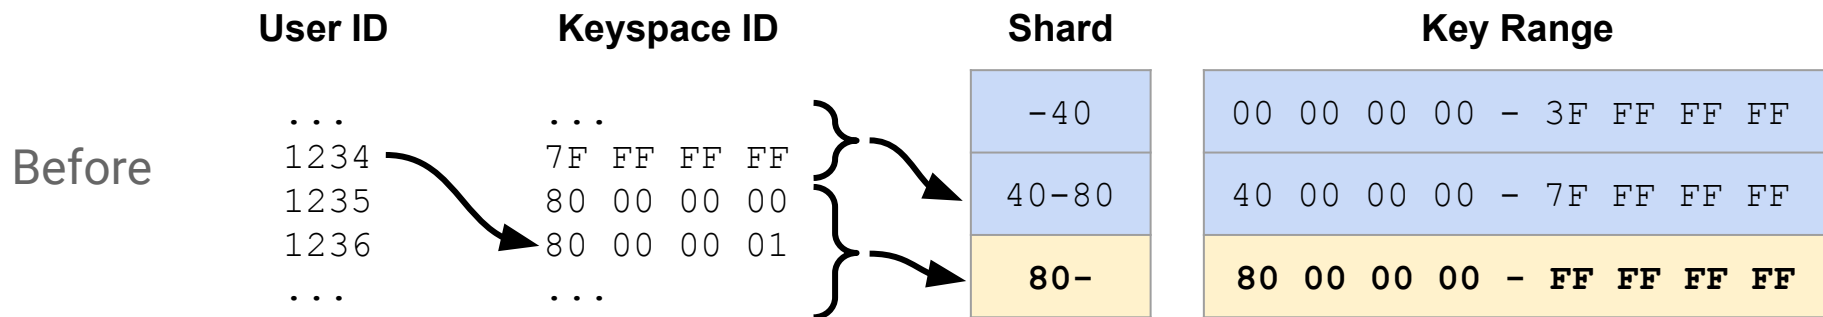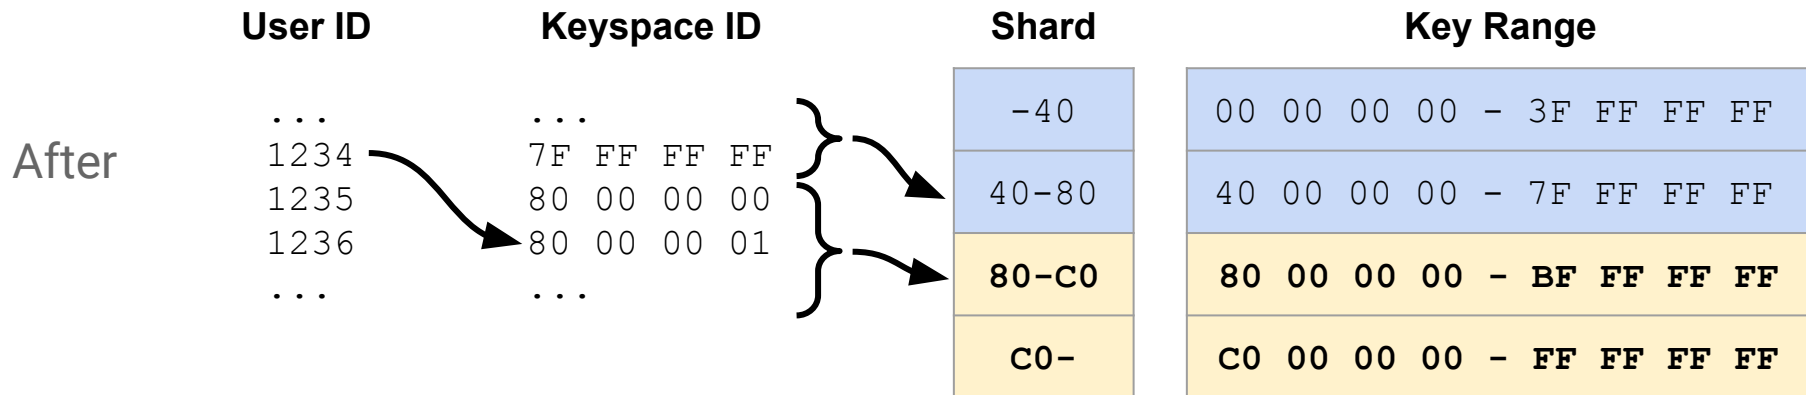

# Transparent to the Application

- The app has no knowledge of what shards exist.
- The app keeps running normally during resharding.

```
def my_hash(user_id):  
    m = hashlib.md5()  
    m.update(uint64.pack(user_id))  
    return m.digest()[:8]
```

```
cursor = conn.cursor('test_keyspace', 'replica', keyspace_ids=[my_hash(user_id)])  
cursor.execute(  
    'SELECT message FROM messages WHERE user_id=%(user_id)s ORDER BY time_created_ns',  
    {'user_id': user_id})  
return [row[0] for row in cursor.fetchall()]
```

# Live Migration

- Old and new shards overlap during migration.

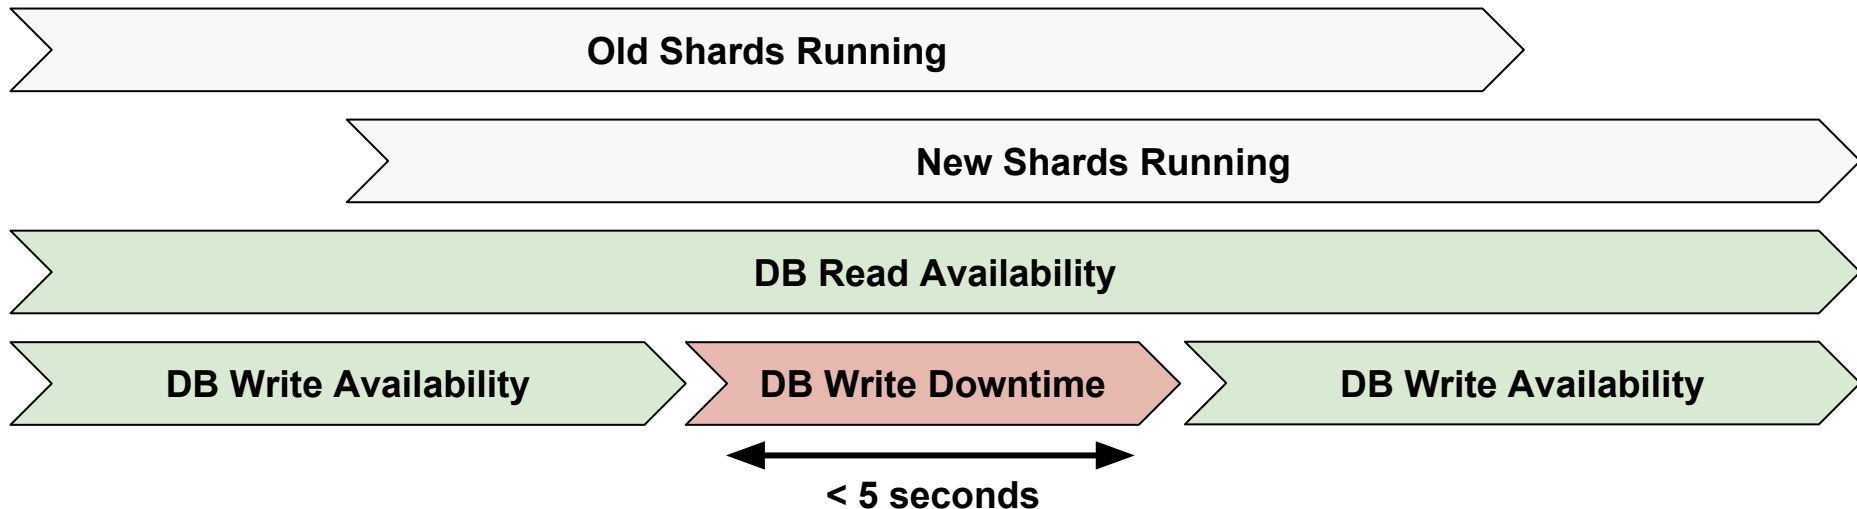

# Masters are cattle too

- Transparent Live Resharding means you can scale master traffic too, by adding cattle.
- When resharding stops being scary...
  - You don't have to predict and provision for years of growth.
  - Provision for good utilization.
  - Start small and scale out as needed.
  - Cool down hot shards one at a time.



# Resharding Workflow

[vitess.io/user-guide/sharding-kubernetes.html](https://vitess.io/user-guide/sharding-kubernetes.html)

# Prepare Schema

- Initial sharding
  - Add Keyspace ID column
  - Populate along with new rows
  - Backfill Keyspace ID for existing rows
- Example: Multi-tenant Guestbook ([vitess.io/getting-started/](http://vitess.io/getting-started/))

```
CREATE TABLE messages (  
  page BIGINT(20) UNSIGNED,  
  time_created_ns BIGINT(20) UNSIGNED,  
  keyspace_id BIGINT(20) UNSIGNED,  
  message VARCHAR(10000),  
  PRIMARY KEY (page, time_created_ns)  
) ENGINE=InnoDB
```

## Guestbook Page 72

I just wanna tell you how I'm feeling  
Gotta make you understand

<http://162.222.180.161/page/72>  
[/env](#)

# Provision New Shards

Moo

```
$ kubectl create -f vttablet.yaml
```

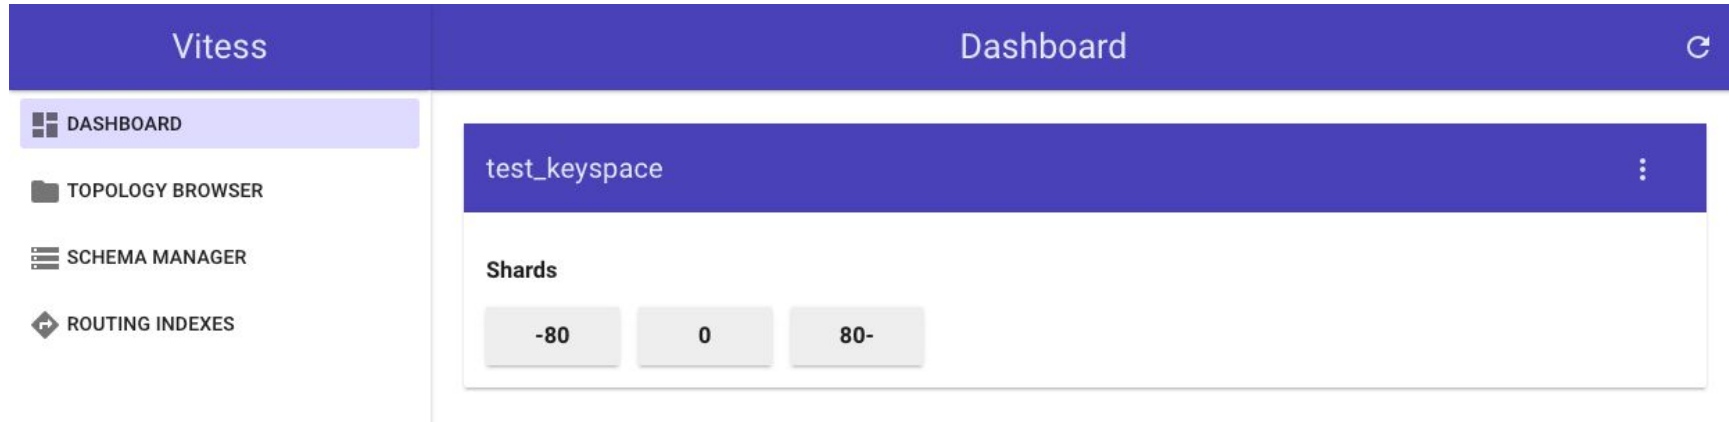

The screenshot displays the Vitess Dashboard interface. On the left, a sidebar contains navigation links: DASHBOARD (highlighted), TOPOLOGY BROWSER, SCHEMA MANAGER, and ROUTING INDEXES. The main content area is titled 'test\_keyspace' and shows the 'Shards' configuration. Three input fields are visible, containing the values '-80', '0', and '80-'. A refresh icon is located in the top right corner of the dashboard header.

| Vitess                                                                                                                                                                                                                                                                                                                                                                                                                                                                    |  | Dashboard                                                                                       |  |
|---------------------------------------------------------------------------------------------------------------------------------------------------------------------------------------------------------------------------------------------------------------------------------------------------------------------------------------------------------------------------------------------------------------------------------------------------------------------------|--|------------------------------------------------------------------------------------------------------------------------------------------------------------------------------------|--|
| <ul style="list-style-type: none"><li> DASHBOARD</li><li> TOPOLOGY BROWSER</li><li> SCHEMA MANAGER</li><li> ROUTING INDEXES</li></ul> |  | <div>test_keyspace </div> <div>Shards</div> <div><div>-80</div><div>0</div><div>80-</div></div> |  |

# Copy Data

- Split Clone
  - Pauses replication on a backup slave
    - So it's consistent with a known GTID set
  - Streams rows to new shards
    - Doesn't use extra disk space on source shard

```
$ vtworker SplitClone --strategy=--populate_blp_checkpoint test_keyspace/0
```

# Filtered Replication

- Vitess annotates DMLs with the Keyspace ID
- New shards subscribe to filtered replication stream
- Let new shards catch up to old shard master

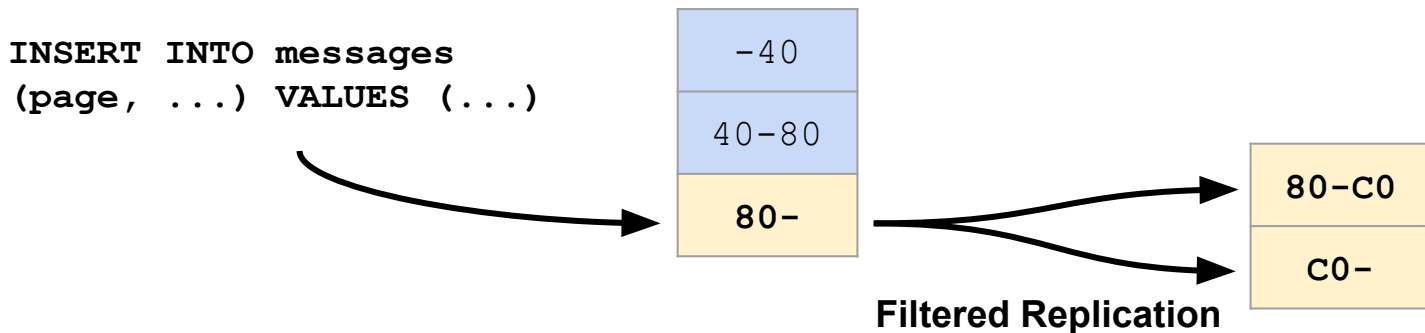

# Verify Data Integrity

- Split Diff
  - Pauses replication on backup slave in old shard
  - Pauses filtered replication on new shards
    - At the equivalent GTID set
  - Performs a row-by-row comparison
    - Also detects rows only present on one side

```
$ vtworker SplitDiff test_keyspace/0
```

# Shard Migration

## Migrate non-master traffic to new shards

```
$ vtctlclient MigrateServedTypes test_keyspace/0 replica
```

## Migrate master traffic to new shards

```
$ vtctlclient MigrateServedTypes test_keyspace/0 master
```

# Scaling Benchmarks



# Scaling Writes by adding Shards

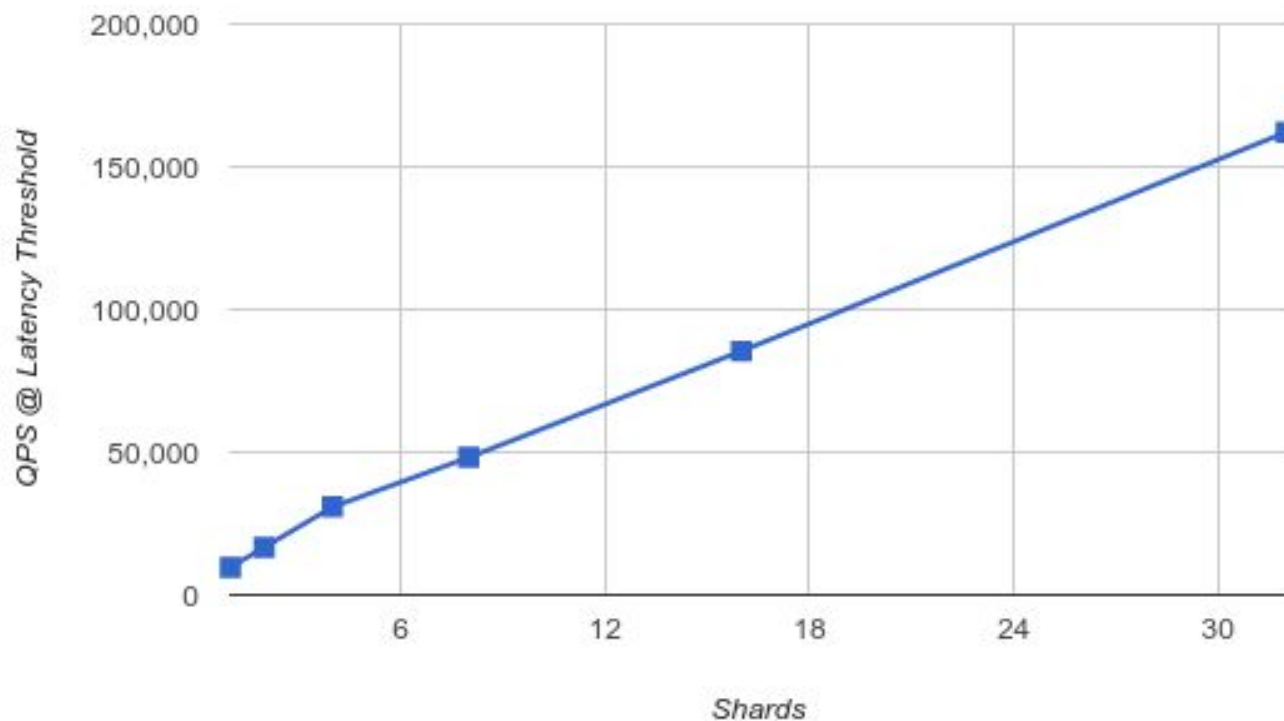

# Scaling Reads by adding Replicas

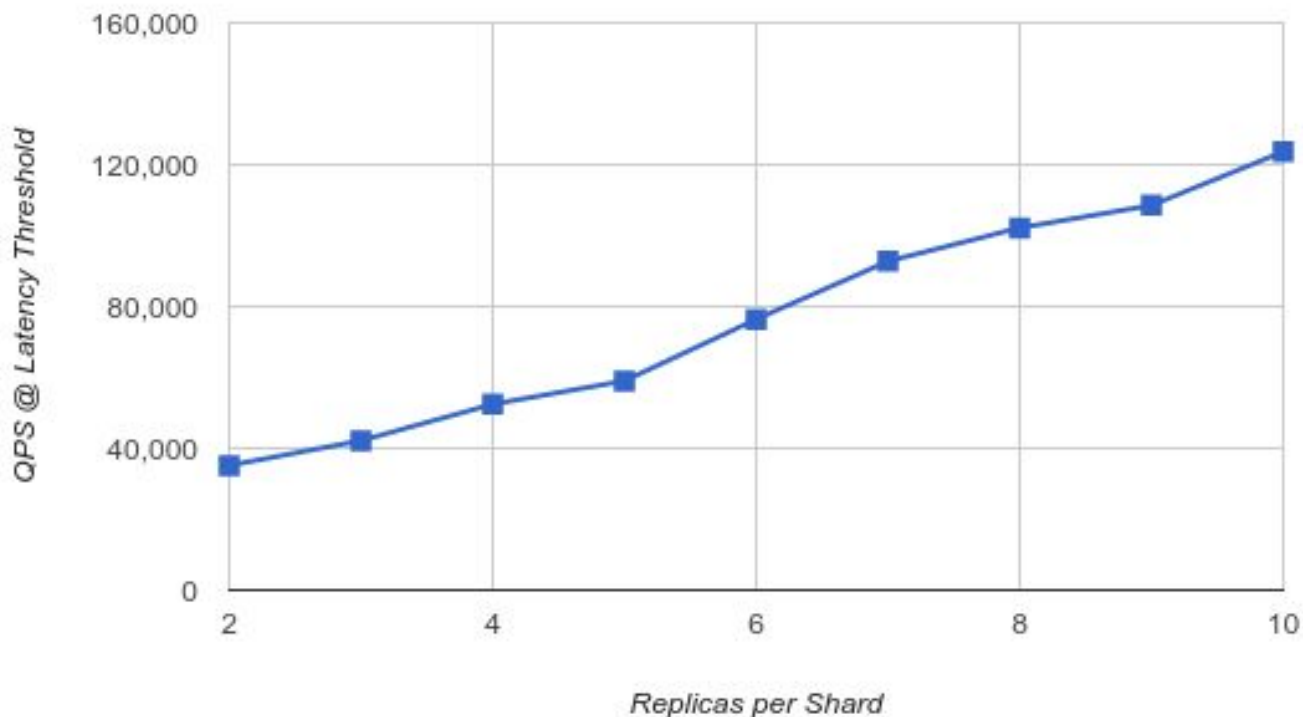

# Vitess Roadmap

# Vitess 2.0.0

- Stable releases
  - API freeze (no breaking changes)
  - Release changelogs ([github.com/youtube/vitess/releases](https://github.com/youtube/vitess/releases))
  - Versioned Docker images ([hub.docker.com/u/vitess/](https://hub.docker.com/u/vitess/))
- What's new in 2.0
  - Deployment configs for Kubernetes 1.0
    - Users reported success on both AWS and Google Cloud Platform
  - Official client libraries for Java, Python, PHP, Go, and Hadoop
  - MySQL 5.6 support
  - Built-in cloud backup/restore
  - HTTP/2-based gRPC protocol ([grpc.io](https://grpc.io))

# Future Plans

- Drop-in drivers for JDBC, PDO, PEP 249
  - Already have Go driver for database/sql
- Cross-shard joins/aggregations
- Automatic master election
- Automated out-of-band schema changes

# Resources

## **Try Vitess**

[vitess.io/getting-started/](https://vitess.io/getting-started/)

[vitess.io/user-guide/sharding-kubernetes.html](https://vitess.io/user-guide/sharding-kubernetes.html)

## **Contribute**

[github.com/youtube/vitess](https://github.com/youtube/vitess)

## **Contact Us**

[vitess@googlegroups.com](mailto:vitess@googlegroups.com)

## **Get Updates**

[groups.google.com/d/forum/vitess-announce](https://groups.google.com/d/forum/vitess-announce)

## **Cloud Native Computing Foundation**

[cncf.io](https://cncf.io)

## **Kubernetes**

[kubernetes.io](https://kubernetes.io)
