# Supplementary material for: Resolving the full spectrum of human genome variation using Linked-Reads
Source: HighWire-hosted journal article supplement (doi:10.1101/gr.234443.118), 2019-03-20
Supplement: Supplemental_longranger-2.2.zip [file percona-2015-vitess-and-kubernetes.pdf › lr2.2-public/lib/go/src/code.google.com/vitess/docs/resources/percona-2015-vitess-and-kubernetes.pdf]

# YouTube ViteSS

Scaling MySQL in the cloud with ViteSS and Kubernetes

Percona Live MySQL Conference

April 14, 2015

Anthony Yeh, Software Engineer, YouTube

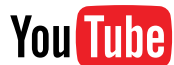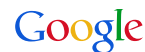

# Vitess in a Nutshell

# Vitess Overview

## Performance

- Connection pooling
- Query deduplication
- Transaction manager
- Rowcache

## Management

- Reparent (master failover)
- Web console
- Multi-region coordination

## Protection

- Query sanitation
- Query blacklist
- Query killer
- Table ACLs
- Health check

## Sharding

- Range-based or app-defined
- Live resharding
- Split by row
- Split by table

## Monitoring / Analysis

- Performance analysis
- Query stream
- Update stream
- MapReduce (Hadoop)

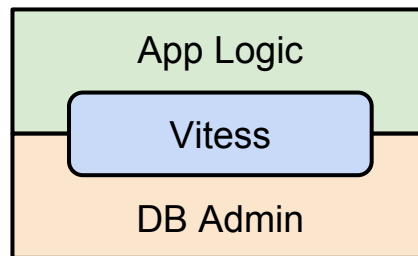

It looks like you're sharding MySQL.

Would you like help?

- Get help with sharding MySQL
- Just do it at the app layer without help
- Don't show me this tip again

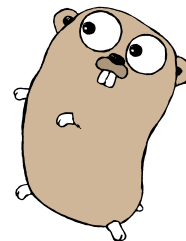

Details: [vitess.io/overview](https://vitess.io/overview)

# App View of Vitess

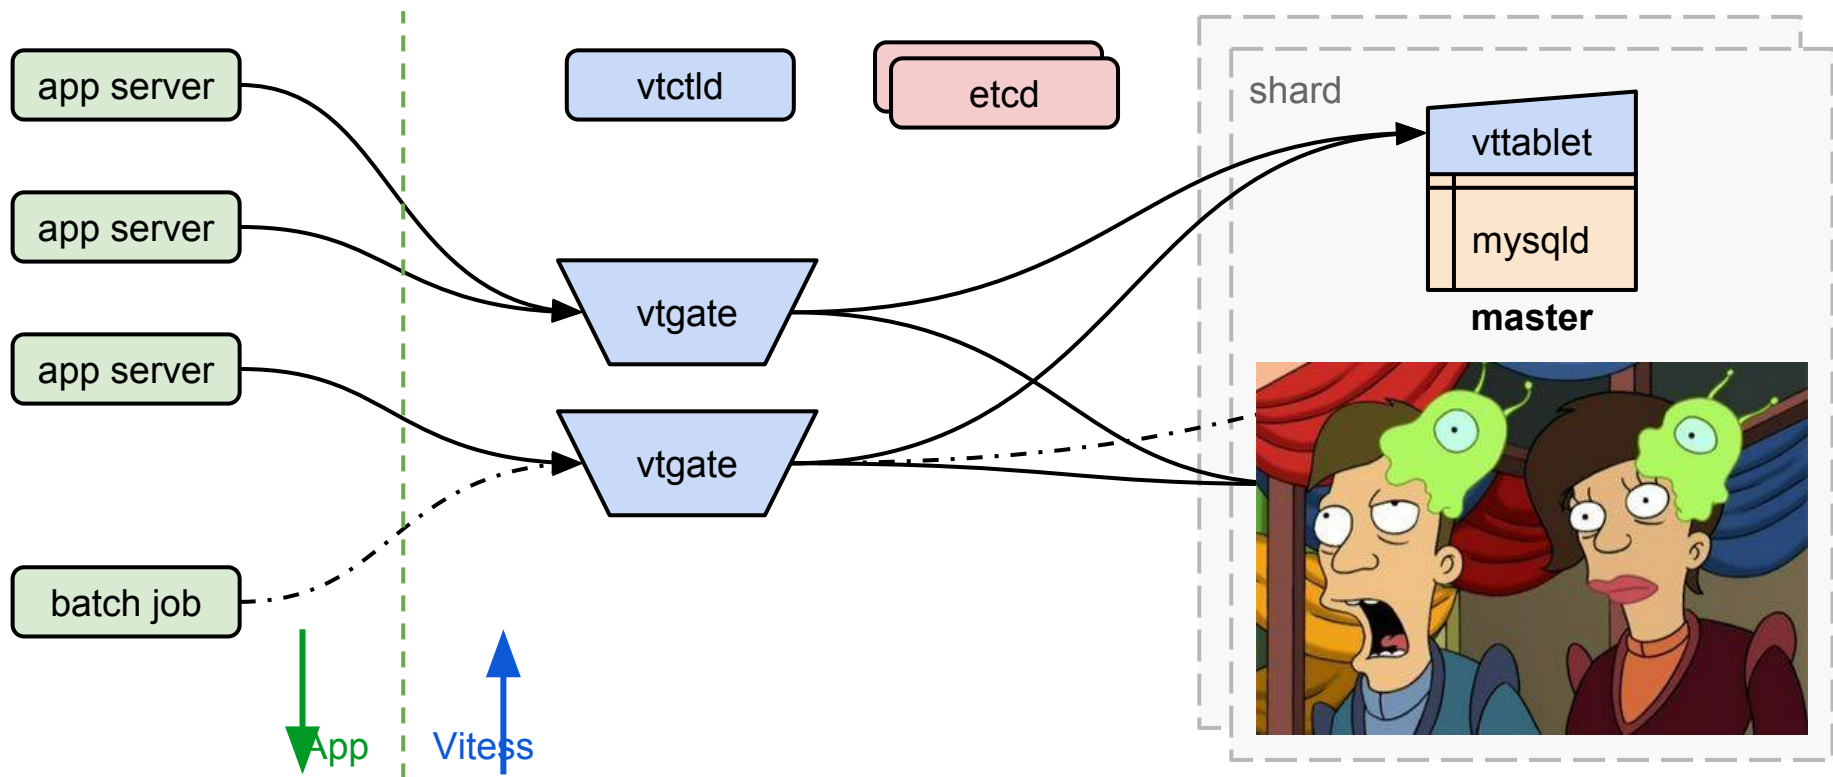

# Admin View of Vitess

## GUI / CLI / RPC

- Examine/modify tablets, shards, keyspaces
- Backup/Restore
- Reparent (failover)
- Schema changes
- Live migrations (e.g. resharding)

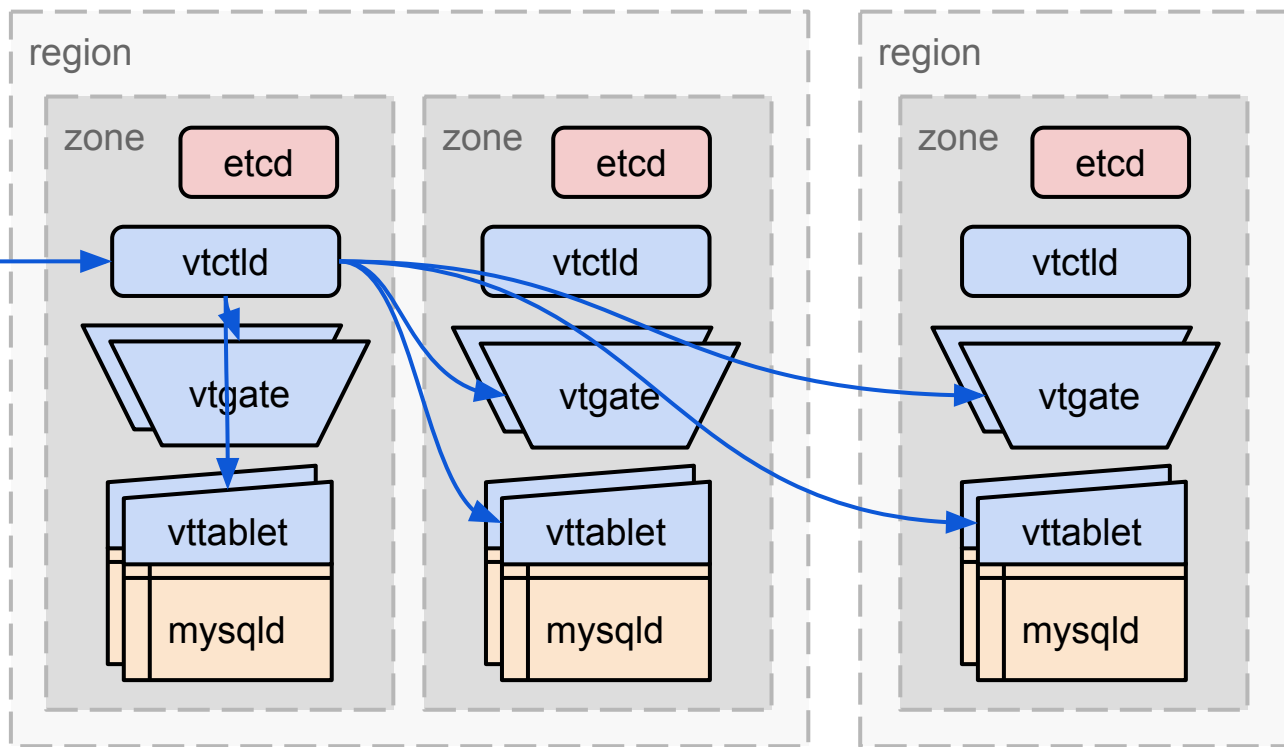

# Performance and Protection

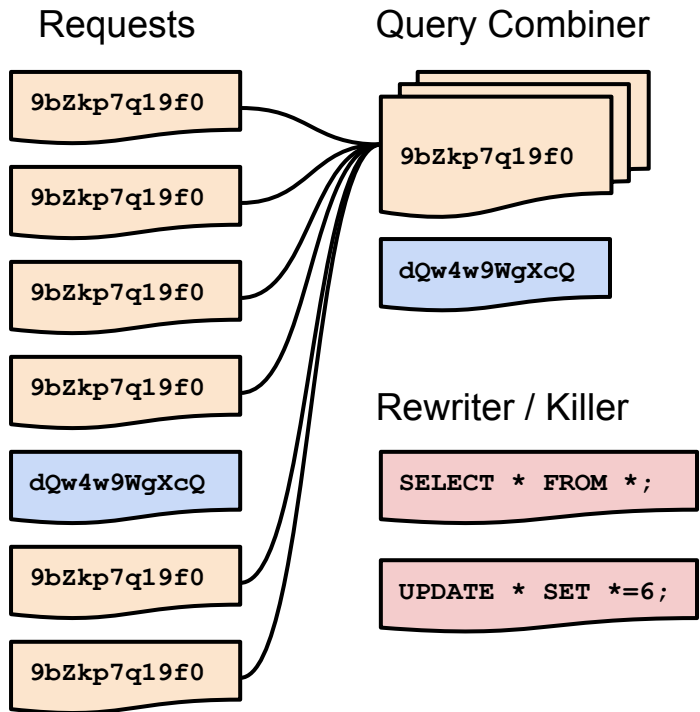

## Row Cache (Vitess)

| id          | title | views      | ... |
|-------------|-------|------------|-----|
| 9bZkp7q19f0 | 강남스타일 | 2298169867 | ... |

## Block Cache (MySQL)

| id          | title | views      | ... |
|-------------|-------|------------|-----|
| ...         | ...   | ...        | ... |
| 9bZkp7q19f0 | 강남스타일 | 2298169867 | ... |
| dQw4w9WgXcQ | ...   | 114838229  | ... |
| ...         | ...   | ...        | ... |

# Sharding Schemes

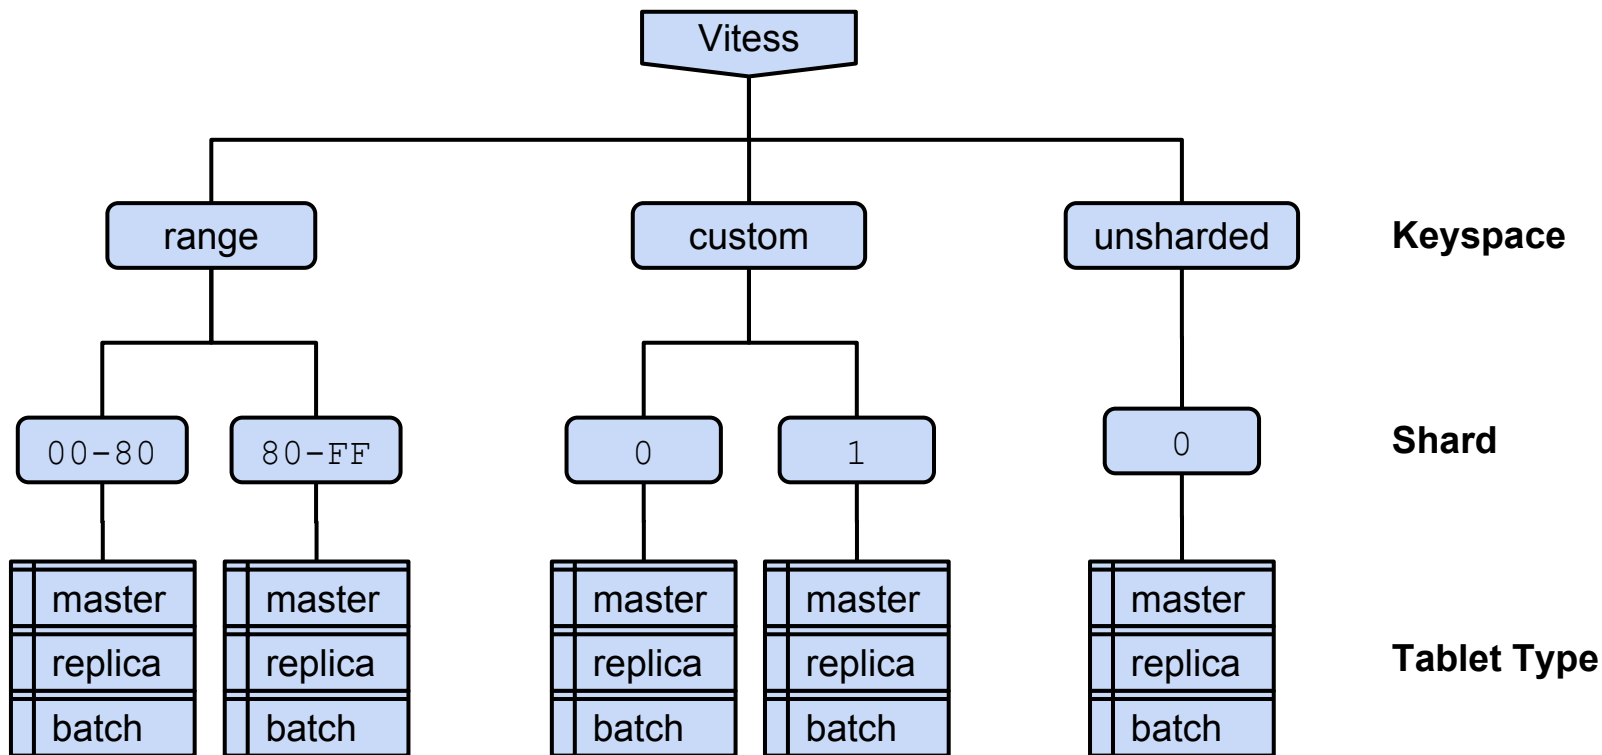

# Vitess in a Container Cluster



# Docker and Kubernetes

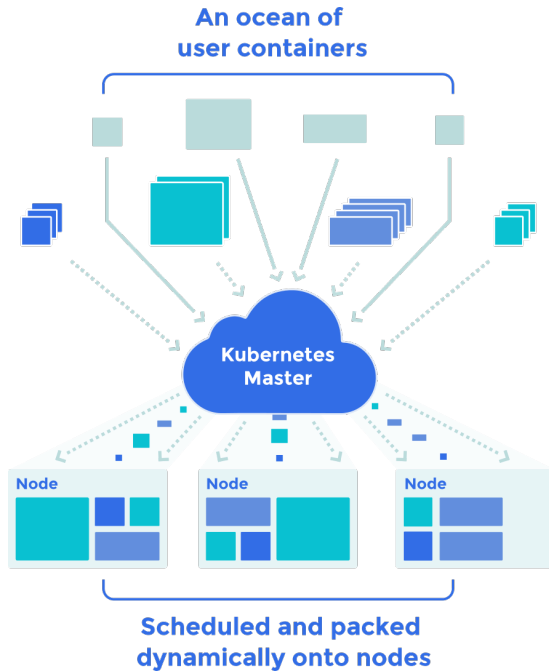

kubernetes.io

- **Container:** Lightweight kernel-level VM
- **Docker:** Container image compiler and runtime
- **Kubernetes:** Container Cluster OS

Shortcut for starting Vitess on Google Container Engine:

```
$ go get github.com/youtube/vitess/go/cmd/vtctlclient
$ cd $GOPATH/src/github.com/youtube/vitess/examples/kubernetes
$ export KUBECTL='gcloud alpha container kubectl'
$ ./cluster-up.sh
```

Detailed guide: [vitess.io/getting-started](http://vitess.io/getting-started)

# Vitess in Kubernetes

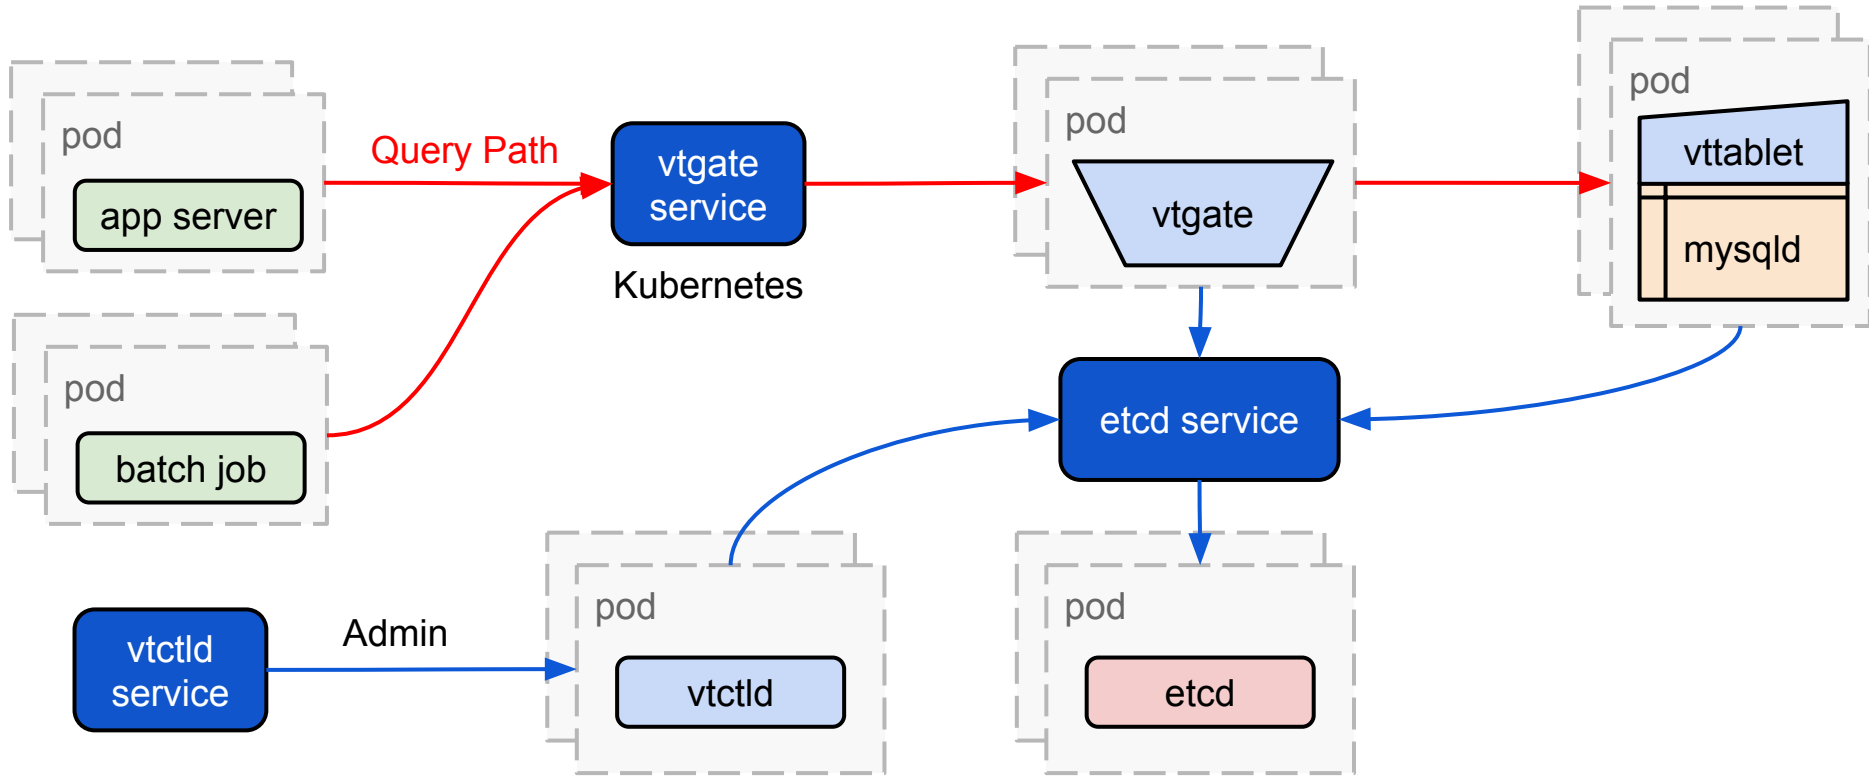

# Vitess in the Cloud

# Transparent Rerouting

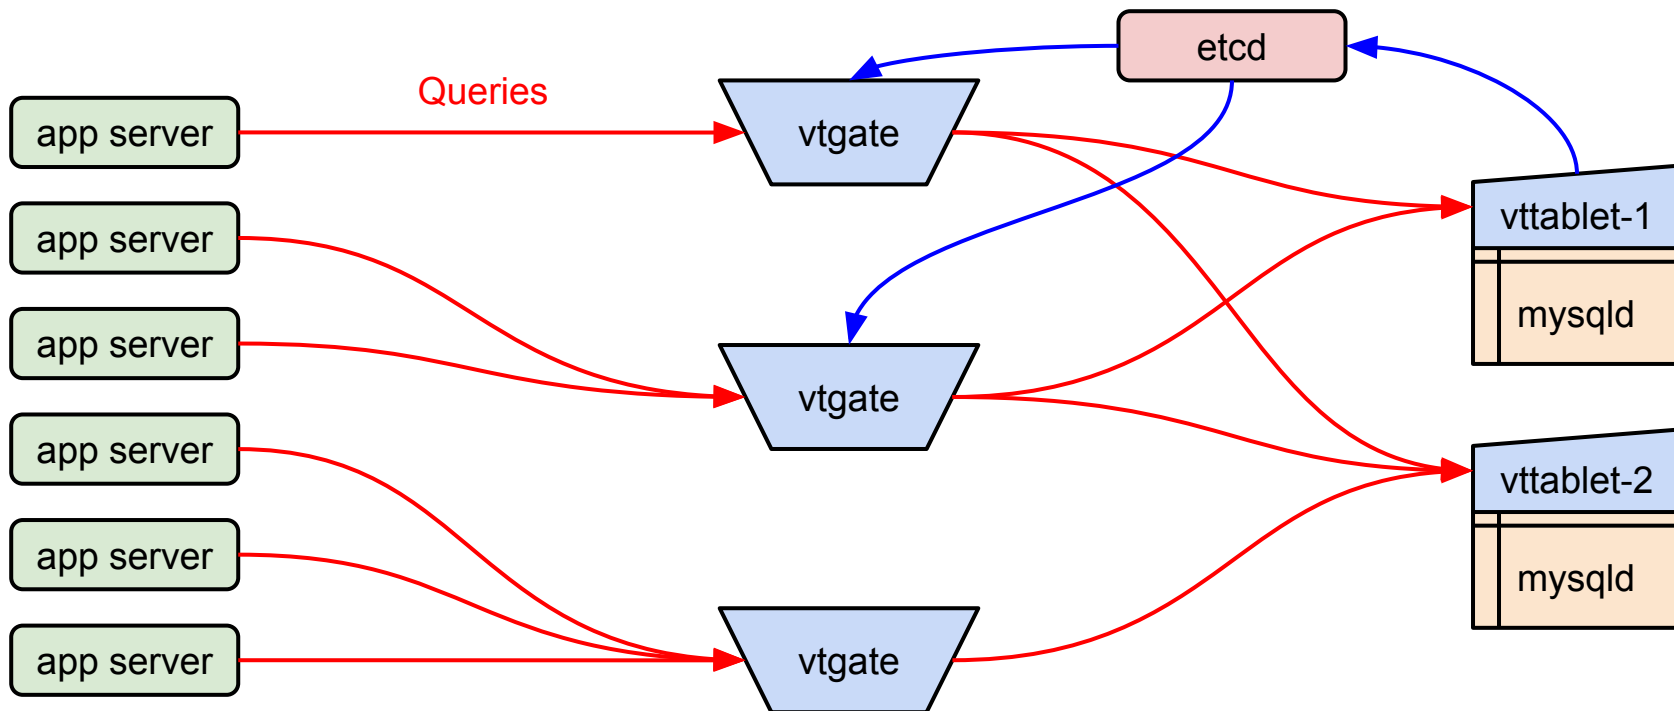

# Routine Reparent

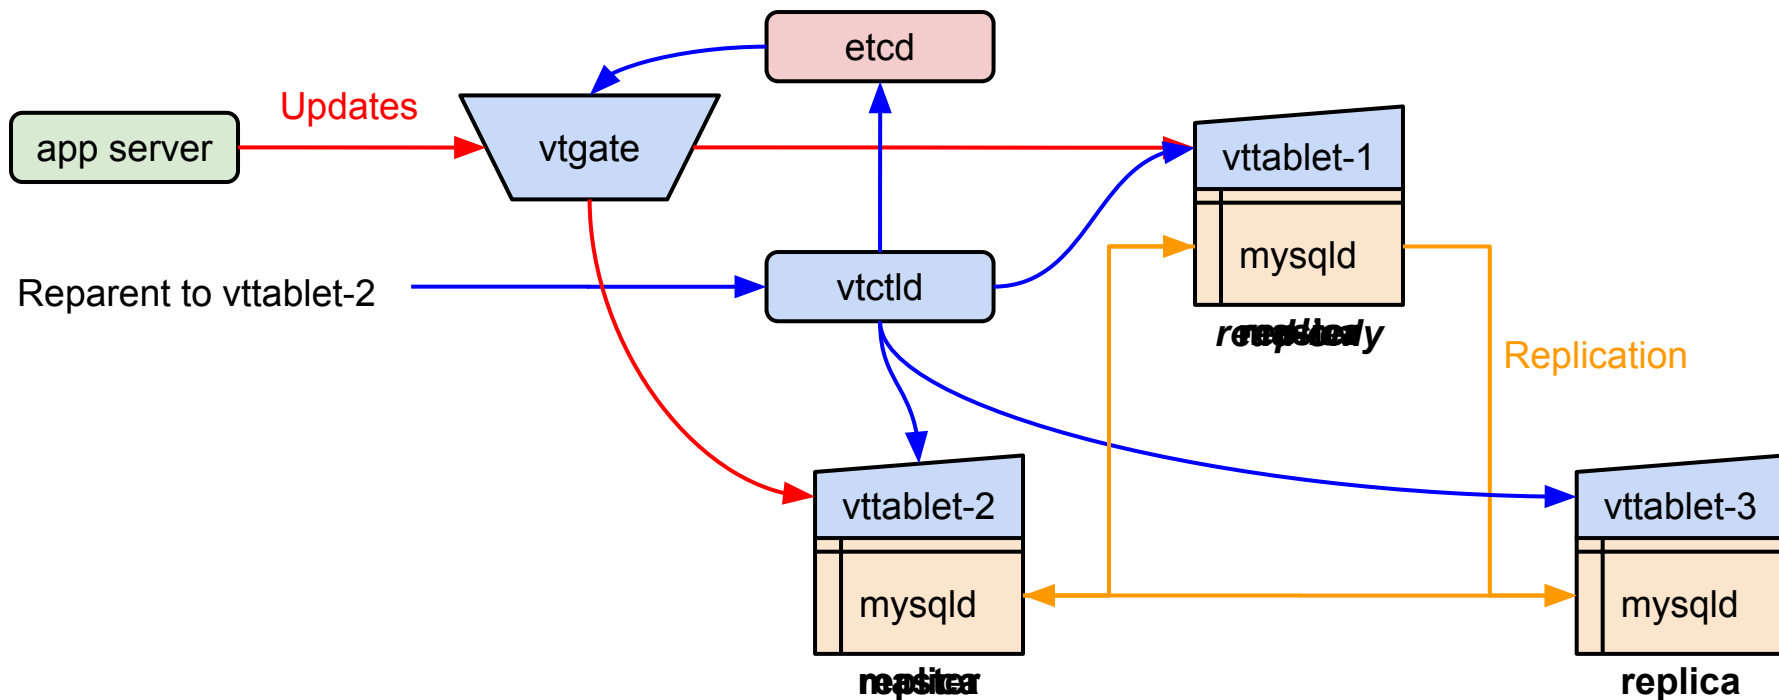

# Live Resharding

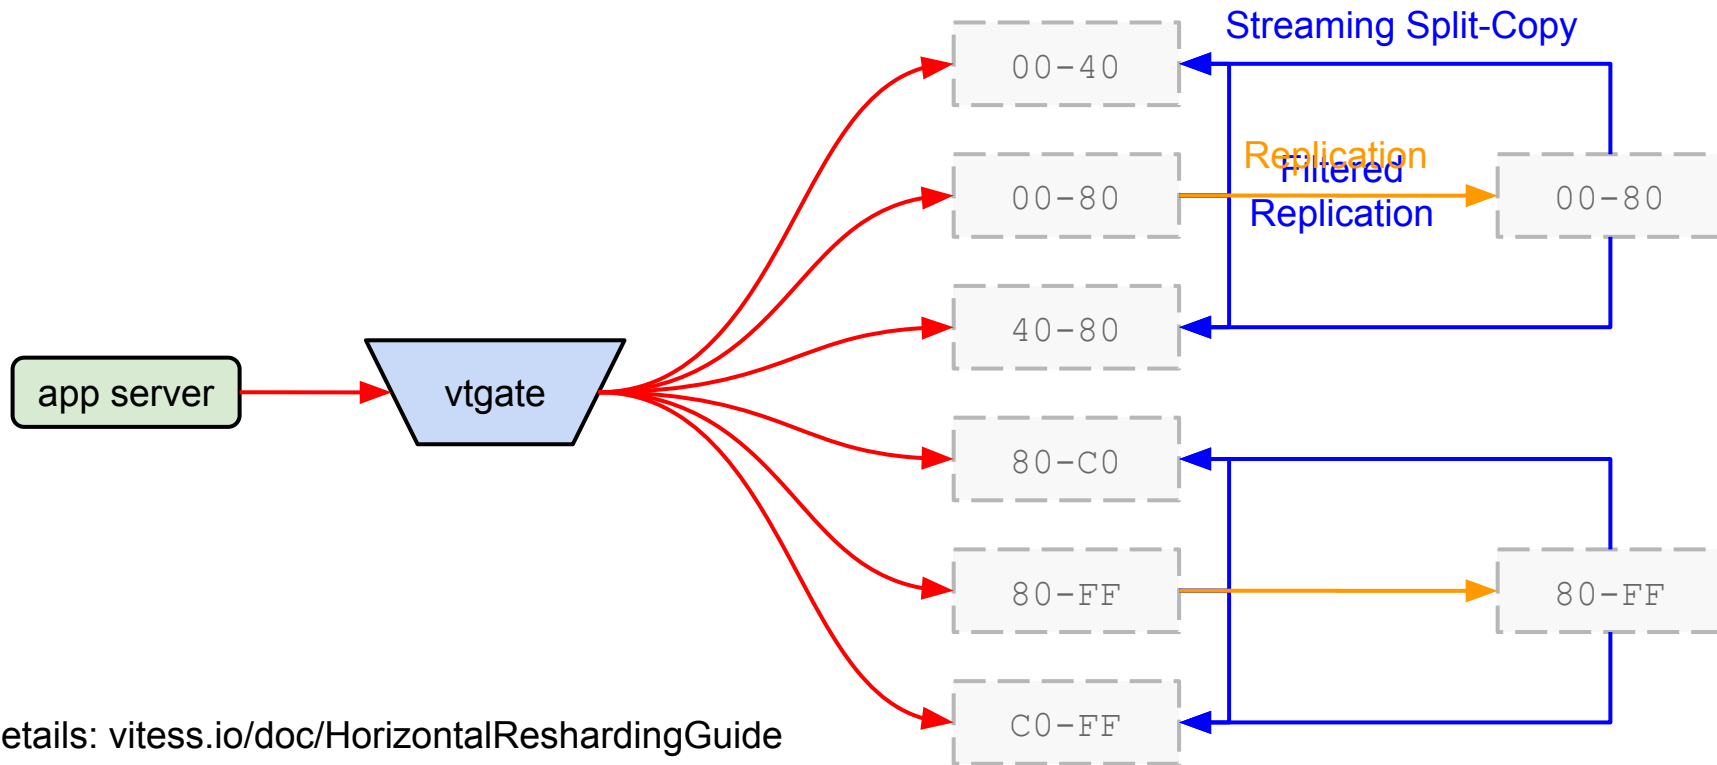

Details: [vitess.io/doc/HorizontalReshardingGuide](https://vitess.io/doc/HorizontalReshardingGuide)

# Vitess in the Future

# Roadmap

- MySQL 5.6
- Benchmarks (YCSB)
- VTGate V3
  - Automatic lookup tables
  - Cross-shard auto\_increment
  - MySQL binary protocol
- High-level automation
  - One-click resharding
  - Rolling (OOB) schema changes
- More documentation
  - Architecture / design
  - How-to guides
- Kubernetes
  - API server proxy for debug access
  - Replication controllers for tablets
  - Cloud plugins for backup/restore (Google Cloud Storage)
- More client support
  - gRPC
  - PHP
- Long-term
  - Cross-shard transactions (2PC)
  - Cross-shard joins/aggregation

Let us know what you'd like to see at [vitess@googlegroups.com](mailto:vitess@googlegroups.com), or better yet...



# Contribute!

- Vitess in Kubernetes on other platforms (AWS, Azure, OpenShift, ...)
  - Backup/Restore plugins (e.g. Amazon S3)
  - Startup guides (firewall rules, load balancers, etc.)
- InfluxDB (monitoring)
  - Vitess can already publish to InfluxDB, but needs work to integrate with Kubernetes
- Other client languages
  - PHP was started, but needs someone who can patch a BSON plugin for PHP

<https://github.com/youtube/vitess>

# Questions?

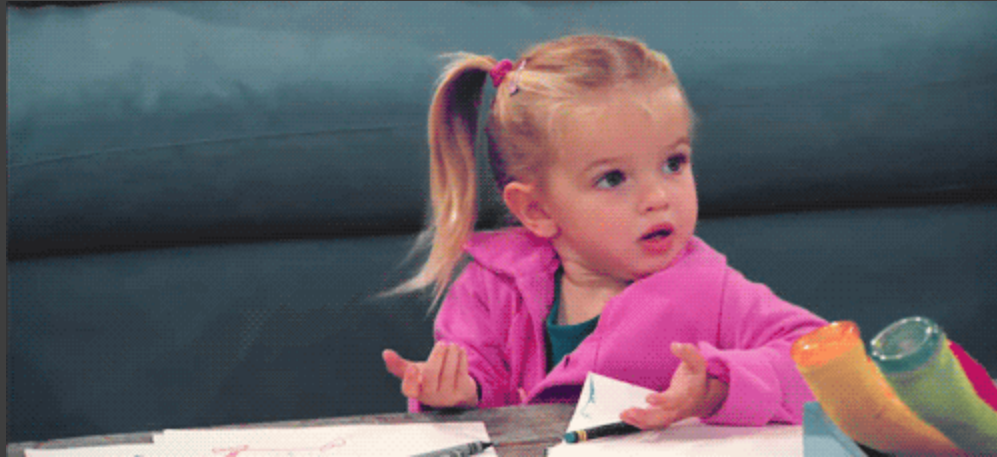

# Resources

## Vitess

vitess.io

github.com/youtube/vitess

vitess@googlegroups.com

## Kubernetes

kubernetes.io

github.com/GoogleCloudPlatform/kubernetes

## Google's MariaDB 10.0 Branch

code.google.com/p/google-mysql

## Other Percona Live talks about MySQL at Google

*Exploring Your Data with InnoDB Explorer* - Jeremy Cole (Wednesday 1pm @ Ballroom A)

*Encrypting MySQL Data at Google* - Jeremy Cole, Jonas Orelund (Thursday 11am @ Ballroom D)
