# Supplementary material for: Resolving the full spectrum of human genome variation using Linked-Reads
Source: HighWire-hosted journal article supplement (doi:10.1101/gr.234443.118), 2019-03-20
Supplement: Supplemental_longranger-2.2.zip [file Vitess2014.pdf › lr2.2-public/lib/go/src/code.google.com/vitess/doc/slides/Vitess2014.pdf]

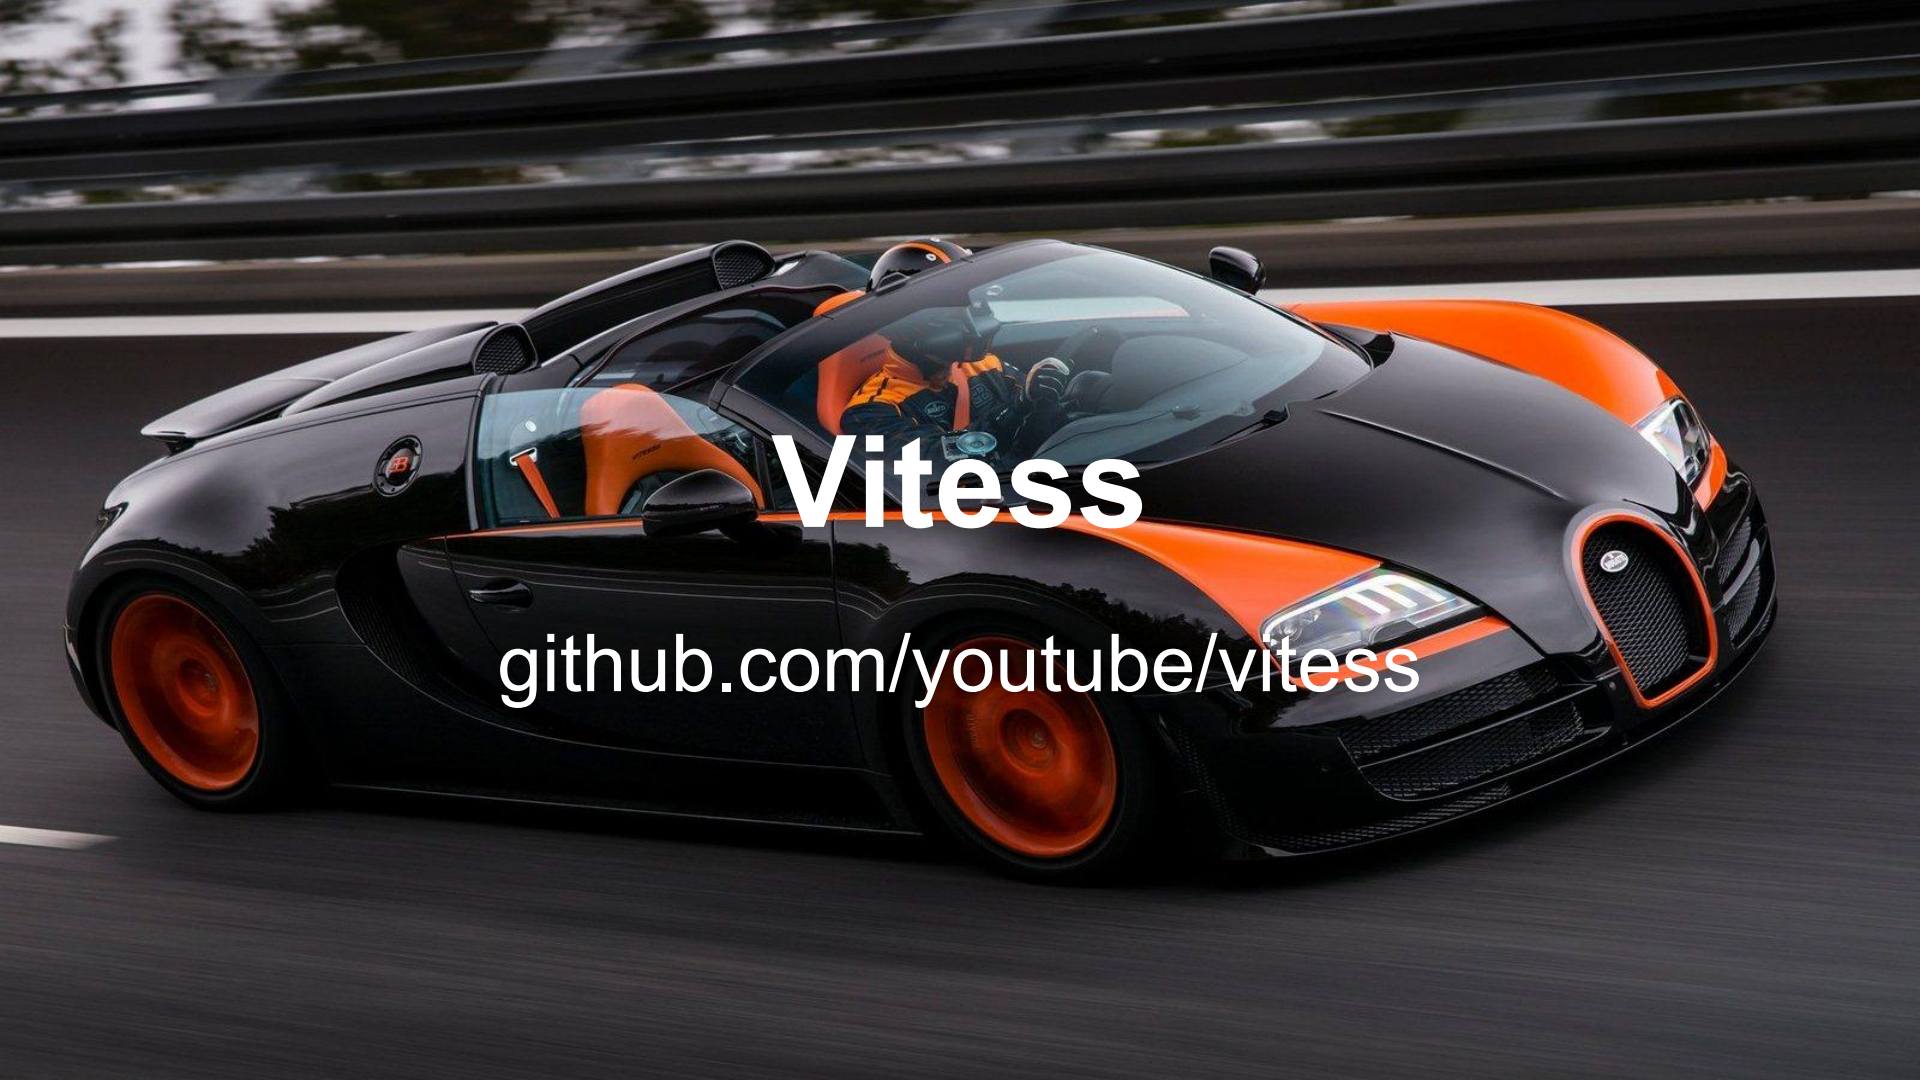

Vitess

[github.com/youtube/vitess](https://github.com/youtube/vitess)

# What is Vitess

- A scalable and efficient storage solution for the web
- Tools
  - Clone, remaster, sharding, split, etc.
- Servers
  - Optimize MySQL performance

# The sweet spot

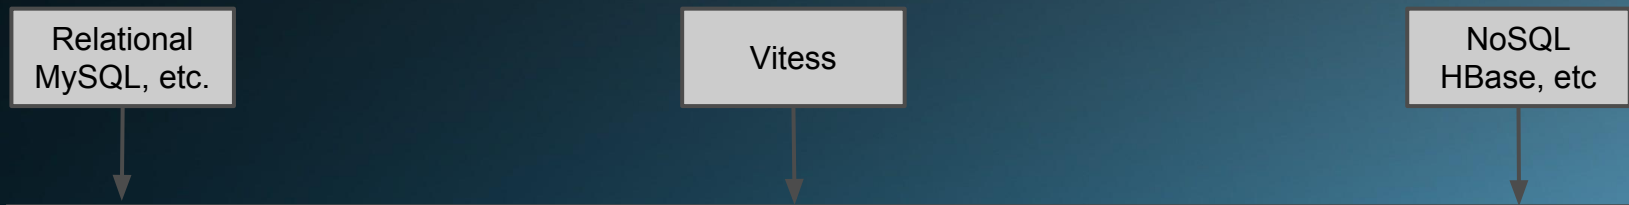

- Pros

- Transactions
- Indexes
- Joins

- Cons

- No sharding
- ACID
- Schema

- Pros

- Transactions (limited)
- Indexes
- Joins
- Sharding

- Cons

- Eventual consistency
- Schema

- Pros

- Sharding
- Unstructured data

- Cons

- Eventual consistency
- No transactions
- No indexes
- No joins

# Why tools?

- Start off simple
- Issues:
  - Data size
  - QPS
  - Uptime
  - Backups
  - Crash recovery
  - Number of connections
    - Let's ignore this for now

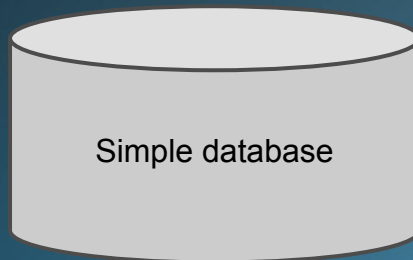

# Add replication

- Issues
  - Utilization
- And
  - Data size
  - Write QPS
  - Write uptime
  - ~~Backups~~
  - ~~Read Uptime~~
  - ~~Read QPS~~
  - ~~Crash recovery~~

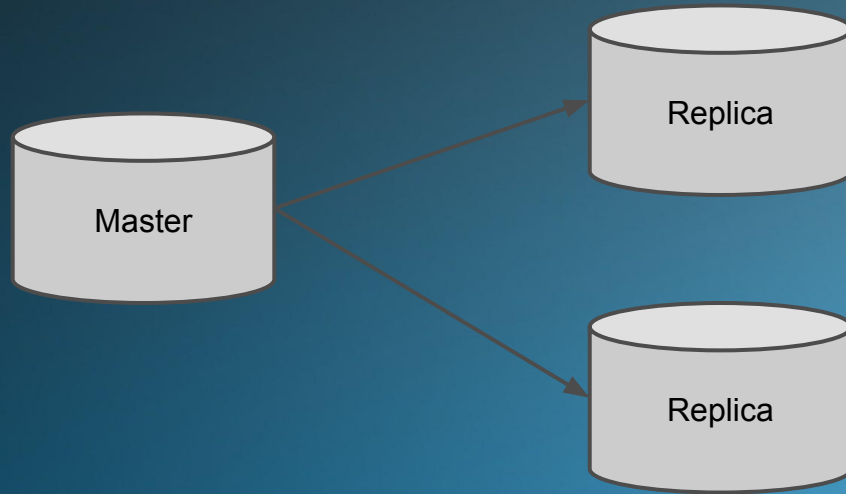

# Add categories

- Issues
  - Track categories
- And
  - Data size
  - Write QPS
  - Write uptime
  - Utilization

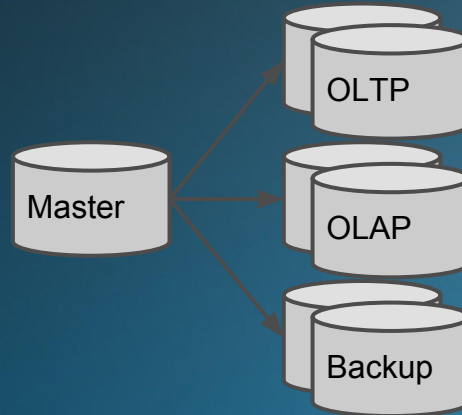

# Add sharding

- Issues
  - Complex client
  - Resharding workflow
  - Track shards
  - Track replication
  - Disaster recovery
- And
  - Track categories
  - Write uptime
  - ~~Data size~~
  - ~~Write QPS~~

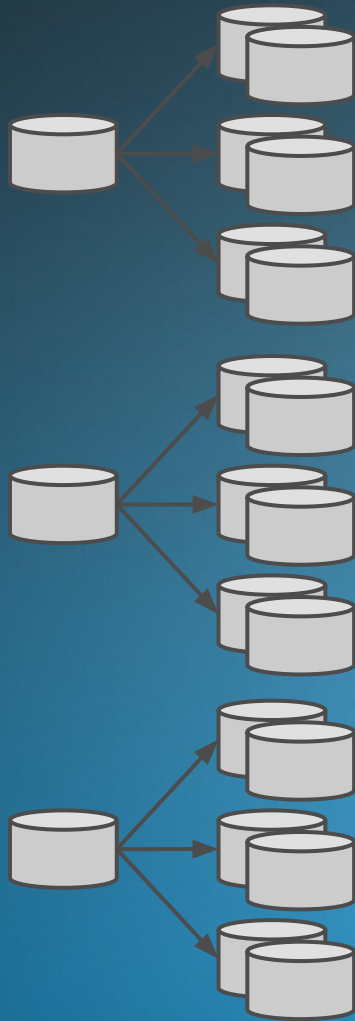

# Add data centers

- Issues
  - Failover workflow
  - Number of connections
- And
  - Complex client
  - Resharding workflow
  - Track shards
  - Track replication
  - Track categories
  - Write uptime
  - ~~Disaster recovery~~

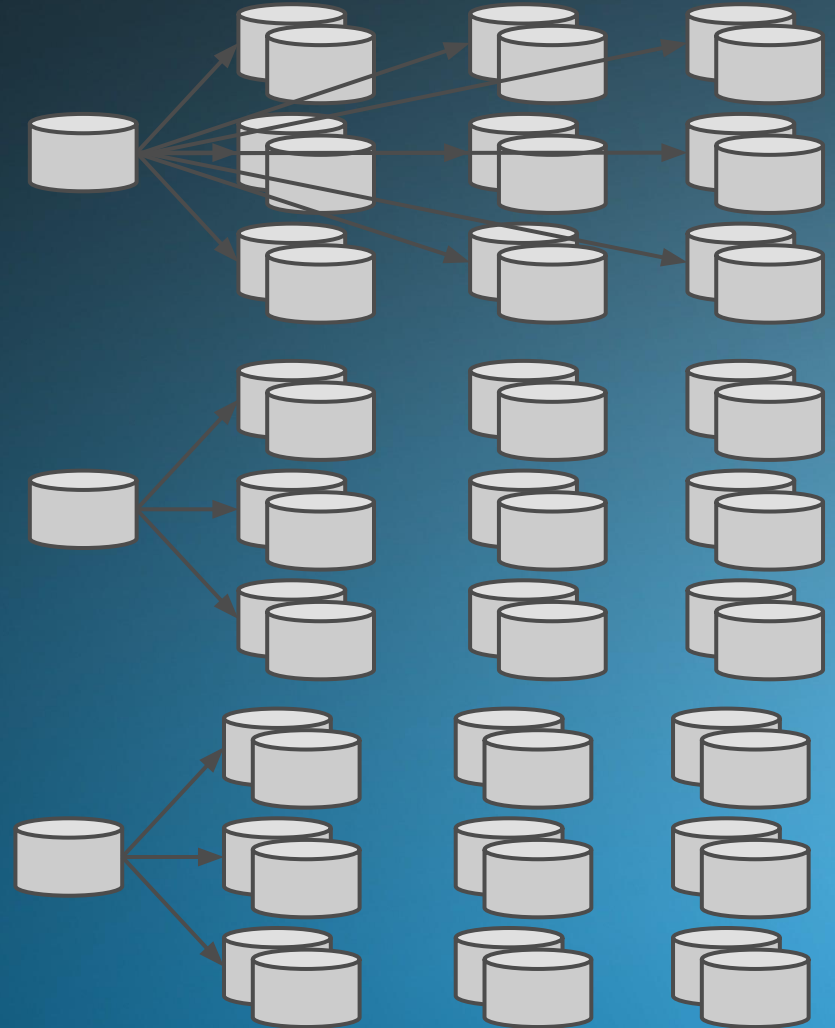



# More complexity

- Multiple logical databases (keyspaces)
- Lookup database

# Vitess lock server (zookeeper)

- Global info
  - Keyspaces
  - Shard graph
  - Master databases
  - List of data centers
- Per-data center
  - Replicas
  - Categories
  - Serving graph

# Vitess tools

- vtctl command-line tool
  - Failover workflow
  - Resharding workflow
  - Track shards
  - Track replication
  - Track categories
- vtctld web server
  - Topology browser

# Vitess servers

- vttablet
  - Sits in front of MySQL and mediates all queries
  - Pools connections
  - Performs local management tasks requested by vtctl
- vtgate query server
  - Complex client
  - Failover workflow
  - Resharding workflow

# The big picture

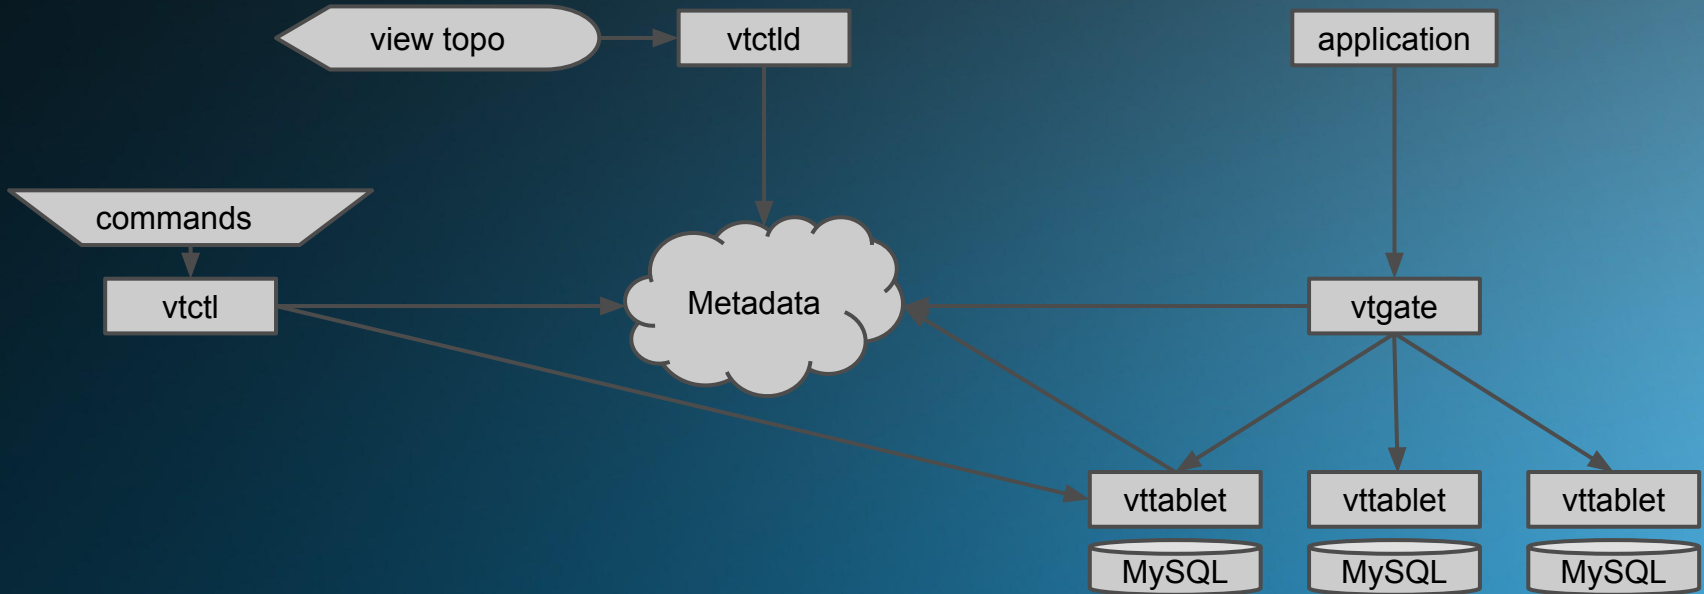

# viteess journey

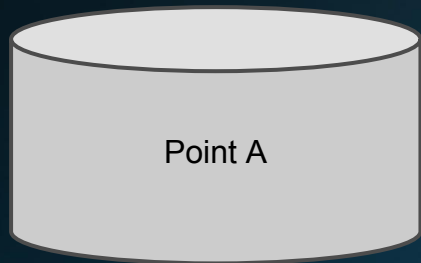

Point A

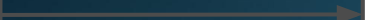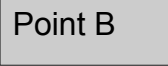

Point B

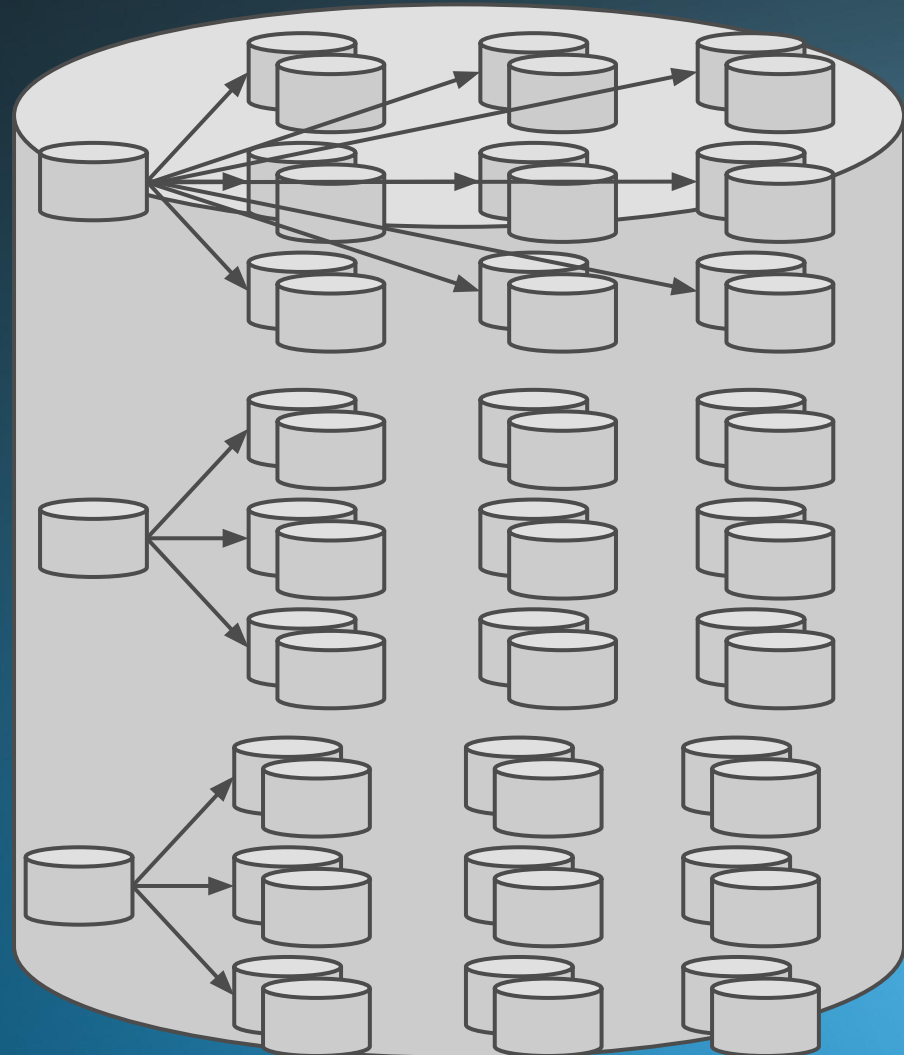

# Why servers?

- MySQL shortcomings
  - Cost of connections
  - No throttling
  - Unbounded results
  - Buffer cache
  - No blacklisting
  - Insufficient stats & diagnostics
- Sharding abstraction
  - Query routing
  - Results aggregation
  - Joins
  - Index lookups
  - Retries

# vtablet: Turbo-charging MySQL

- Co-exists with every MySQL instance
- Query service
- Tablet management
- Binlog streaming services



# Query service: efficiency

- Connection pooling
- Results reuse
- SQL parser, query rewriter
- Rowcache
  - Primary key based fetches
  - Consistent
  - More efficient than MySQL buffer cache
  - Used for subquery lookups

# Query service: failsafes

- Transaction management
- Row count limit
- Transaction limit
- Query and transaction timeouts
- Query blacklisting

# Query service: enrichment

- DML annotations
- Stats
- Info & error logs
- Verbose streamlog
- Zero downtime restarts

# vtablet submodules

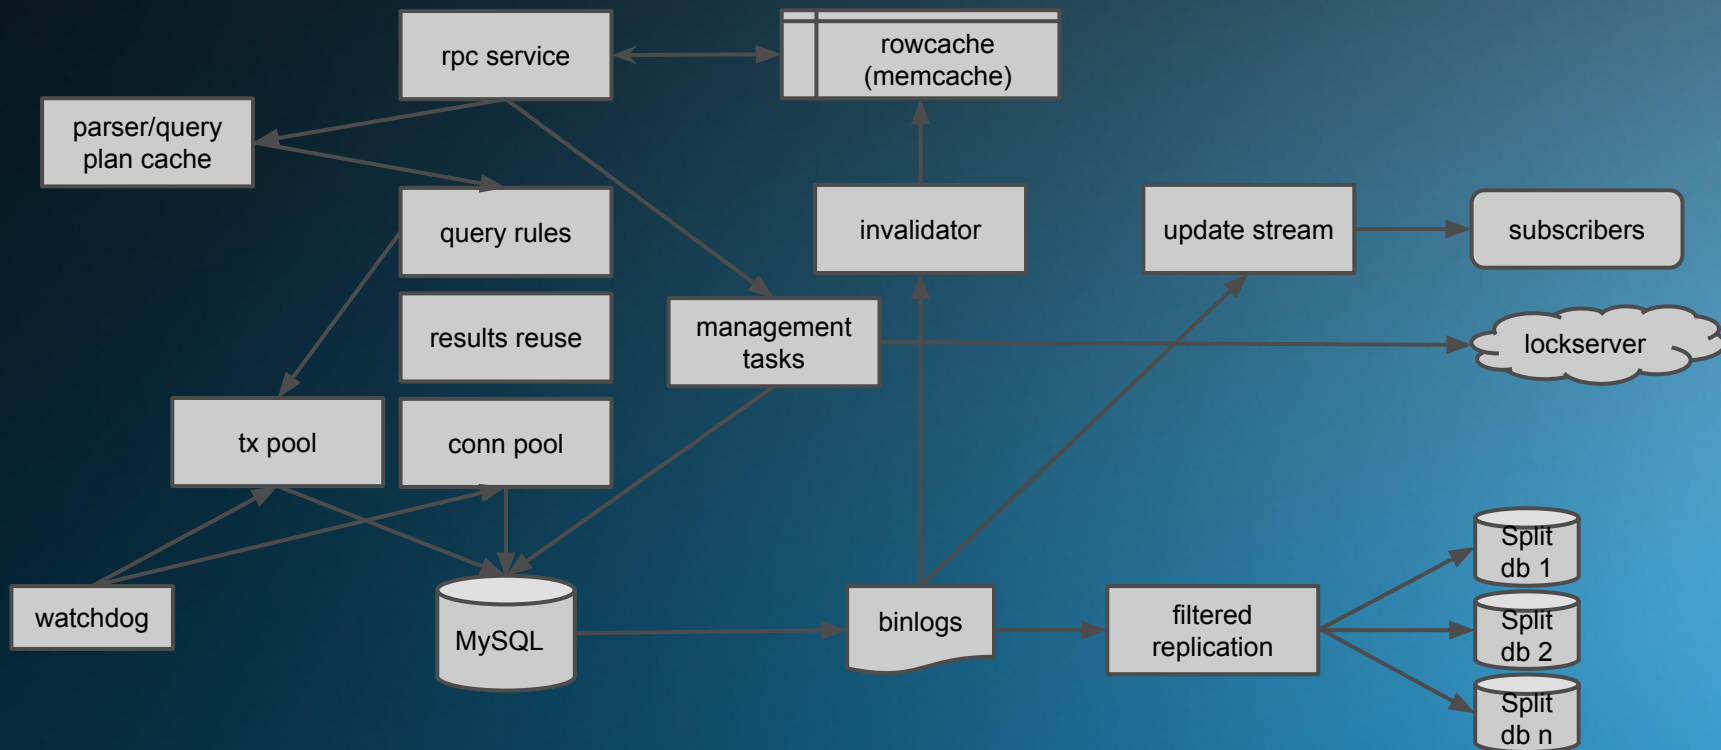

# Production ready

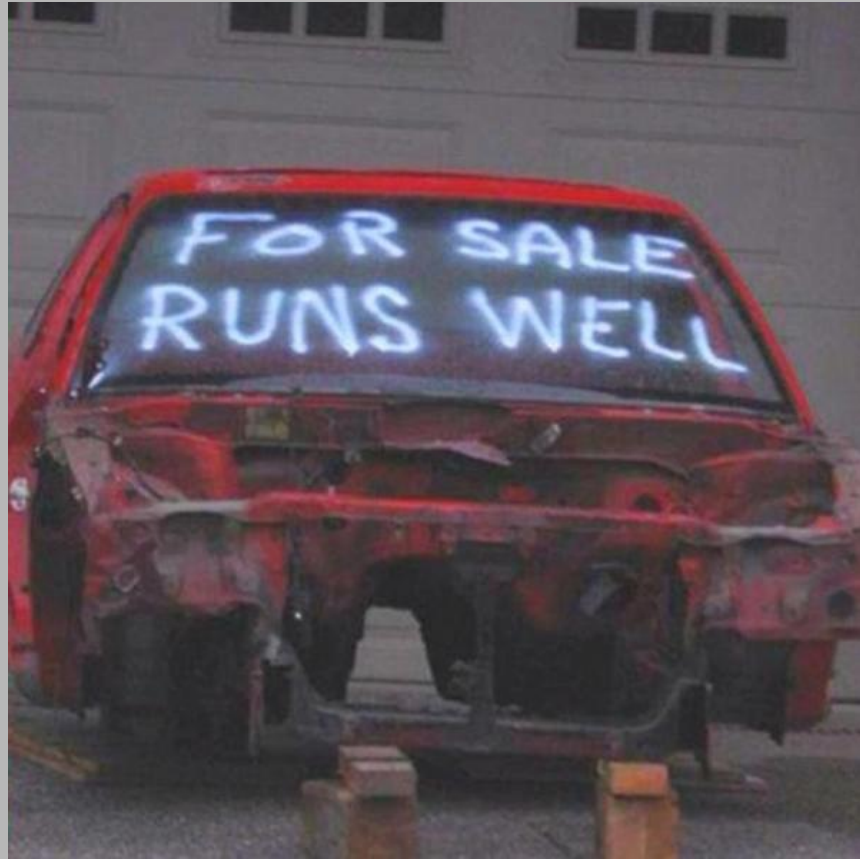

# vtablet in production

- Serves all of YouTube's MySQL traffic
- In production since 2011
- 10K-40K connections
- Vast increase in MySQL serving capacity
- Config, logging, stats & monitoring
- Rowcache getting ready to launch

# Dependencies

- Google MySQL (group id)
- Zookeeper
- Go 1.2
- Python
- Other misc Linux tools (apt-get)

# vtgate

- Route client queries to the right vtablet
- Balance load
- Built-in retries
- Up-to-date with db state changes
- Multi-shard queries
- Multi-db transactions



# vtgate future

- Cross-shard indexes
- Cross-shard aggregations
- Cross-db joins
- Map-reduce
- Resumable streaming queries

# RPC protocol: rpcplus

- Fork of go's rpc
  - Call context
  - Streaming
- Security
  - SASL Authentication
  - SSL
- Encoding agnostic
  - bson, gob, json
  - Other encodings
- Clients
  - go
  - python

# Go experience

- Vitess & Go
- Go tips

# Code base

- memcache, zookeeper and mysql clients
- bson protocol
- rpcplus
- connection pooling
- process management
- stats
- stream logging
- servers: vttablet, vtgate, zk proxy, vtctld
- tools: vtctl, mysqlctl, vtworker, zk browser
- Lines of code: ?

# Expressive

- LRU Cache: 224 lines
- Connection pooler: 260 lines
- memcache client: 280 lines

# Challenges

- Started in 2010: pre-1.0
- rpc performance
- cgo calls
- garbage collector
- network I/O
- runtime scheduler
- memory leaks

# List in LRU Cache

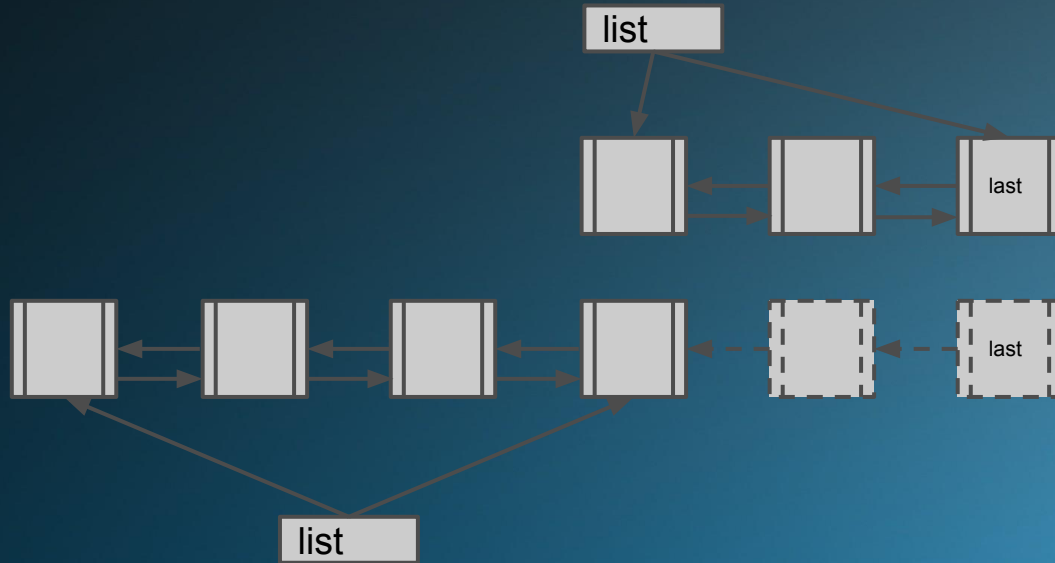

# Go highlights

- Language

- minimalist
- interfaces
- goroutines
- channels & selects
- closures
- defers
- type conversions
- type switch

- Tools

- compiler
- libraries
- cgo
- /debug/pprof
- /debug/vars
- race detector
- gofmt
- goimports



# Generics

- High level generics
  - Use interfaces
  - Closures can also be used
  - Requires little bit of forethought (struct->interface)
  - Not efficient for primitive types/operations
- Language defined generics
  - maps, slices & channels
- Other low level generics
  - Requires code generation

```
~/gotest> cat min.go
```

```
package min
```

```
func Min(v1, v2 Generic) Generic {  
    if v1 < v2 {  
        return v1  
    }  
    return v2  
}
```

```
~/gotest> gofmt -r 'Generic -> int' min.go
```

```
package min
```

```
func Min(v1, v2 int) int {  
    if v1 < v2 {  
        return v1  
    }  
    return v2  
}
```

```
~/go/src/pkg/container/list> gofmt -r 'interface{} -> int' list.go
```

# C++ vs Go

- Performance: C++ generally wins (for now)
- Real-time systems: C++ wins
- Pretty much loses on everything else
  - Readability & maintainability
  - Type safety
  - Compiler speed
  - Platform independence
  - Debuggability
  - Null terminated strings

# Python vs Go

- Expressibility
  - Python wins for small programs
  - Go comes out ahead for large programs/teams
- Libraries: Python wins (for now)
- Debuggability: Python wins
- Performance: Go wins

# Pain points

- []byte vs string
- error vs panic
- channels are one way
- buffered vs. unbuffered channels
- GC for large footprints

# Pitfalls - nil interface

```
func x() error {  
    return y()  
}
```

```
func y() *MyError {  
    return nil  
}
```

Is `x() == nil`?

Mitigation: Never return custom error types

# Pitfalls - range vars

```
for _, url := range urls {  
    go func() {  
        fmt.Println(url)  
    }()  
}
```

How many urls get printed?

Mitigation(s):

```
for _, url := range urls {  
    url := url  
    go func() {  
        fmt.Println(url)  
    }()  
}
```

```
for _, url := range urls {  
    go func(url string) {  
        fmt.Println(url)  
    }(url)  
}
```

# Pitfalls - implicit conversions

```
var a int
var b interface{} = a
fmt.Printf("Types: %T, %T\n", a, b)
```

What gets printed?

- A conversion to interface is implicit
- An interface cannot contain another interface



# Pitfalls - scoping

```
var a int
a, err := func() // only err new
```

```
var a int
if ... {
    a, err := func() // a and err are new
}
```

# Cool constructs

- Wrapping interfaces
- Methods on primitive types
- Closures are first class variables
- defer
- switch a.(type)

# Wrapping interfaces

```
var accepts = sync2.AtomicInt64(0)

// CountingListener tracks the total number accepted connections
type CountingListener struct {
    net.Listener
}

// Accept increments the 'accepts' counter before returning a connection.
func (l *CountingListener) Accept() (c net.Conn, err error) {
    c, err := l.Listener.Accept()
    if err != nil {
        return nil, err
    }
    accepts.Add(1)
    return c, nil
}
```

# Methods on primitive types

```
type AtomicInt64 int64

func (i *AtomicInt64) Add(n int64) int64 {
    return atomic.AddInt64((*int64)(i), n)
}

func (i *AtomicInt64) Set(n int64) {
    atomic.StoreInt64((*int64)(i), n)
}

func (i *AtomicInt64) Get() int64 {
    return atomic.LoadInt64((*int64)(i))
}
```

# Closures

```
import "http"

func foo() {
    ...
    http.HandleFunc(path, func(w http.ResponseWriter, r *http.Request) {
        myfunc(path, w, r)
    })
}
```

- Create them anywhere
- Use them anywhere
- maps, slices, function arguments, return variables, go calls, defers, ...

# Generics using closures

```
func withRetry(action func(conn *Conn) error) error {  
    for i := 0; i < 3; i++ {  
        conn, err = GetConn()  
        if err != nil {  
            continue  
        }  
        err = action(conn)  
        if err == nil {  
            return nil  
        }  
    }  
    return err  
}
```

```
func Begin() error {  
    return withRetry(func(conn *Conn) error {  
        return conn.Begin()  
    })  
}  
  
func Execute(query *Query) (*Result, error) {  
    var r *Result  
    err := withRetry(func(conn *Conn) error {  
        var innerErr error  
        r, innerErr = conn.Execute(query)  
        return innerErr  
    })  
    return r, err  
}
```

# Closures (another example)

```
func foo() {  
    mu.Lock()  
    defer mu.Unlock()  
    ...  
    func() {  
        mu.Unlock()  
        defer mu.Lock()  
        // Perform some unlocked ops here, like waiting  
    }()  
    // Resume locked operation here  
}
```

# switch on type

```
switch value.(type) {  
  case []byte:  
    out = fmt.Sprintf("%q", value)  
  default:  
    out = fmt.Sprintf("%v", value)  
}
```



# Reusable parts of vitess

- bson
- bytes2: ChunkedWriter
- cache: LRUCache
- cgzip: A faster gzip (wraps C library)
- flagutil: flags for string lists & maps
- hack: Unsafe (but efficient) casts

# Reusable parts of vites (contd)

- memcache: memcache client
- mysql: Low level mysql client
- netutil: Convenience ip & dns functions
- pools: Resource pools
- proc: Zero-downtime restart
- rpcplus: rpc+context+streaming

# Reusable parts of vites (contd)

- stats: advanced stats for expvar
- streamlog: non-blocking http logger
- sync2: nifty sync wrapper
- timer: time, with housekeeping conveniences

# Vitess team

- Dev

- Alain Jobart
- Sugu Sougoumarane
- Shruti Patil
- Ric Szopa
- Liang Guo

- Ops

- Prashanth Labhane
- Jojo Antonio
- Dan Rogart
- Prem Gogineni

We're hiring!

# Questions?

- Vitess: <https://github.com/youtube/vitess>
- Go: <http://golang.org>
