# Supplementary figures and images for: Resolving the full spectrum of human genome variation using Linked-Reads
Source: HighWire-hosted journal article supplement (doi:10.1101/gr.234443.118), 2019-03-20

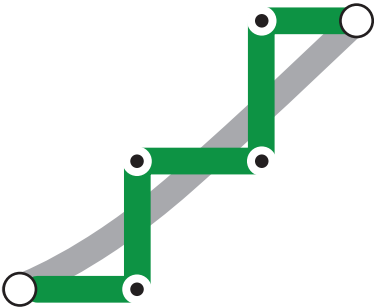

# Gibbs

# Local

Discrete or Constrained  
Parameters

Supplement: Supplemental_longranger-2.2.zip [file gibbs-local.pdf › lr2.2-public/lib/stan/cmdstan/stan/logos/gibbs-local.pdf]

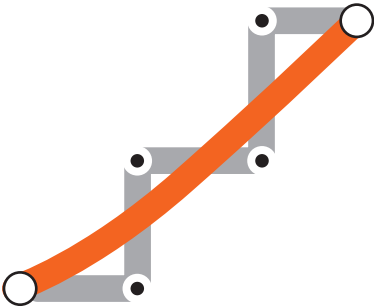

# Hamiltonian Express

Unconstrained Parameters

Supplement: Supplemental_longranger-2.2.zip [file hamiltonian-express.pdf › lr2.2-public/lib/stan/cmdstan/stan/logos/hamiltonian-express.pdf]

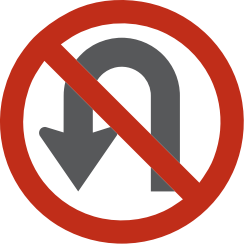

# No U-Turn Sampler

Automatic Step Size and  
Number Adaptation

Supplement: Supplemental_longranger-2.2.zip [file nuts.pdf › lr2.2-public/lib/stan/cmdstan/stan/logos/nuts.pdf]

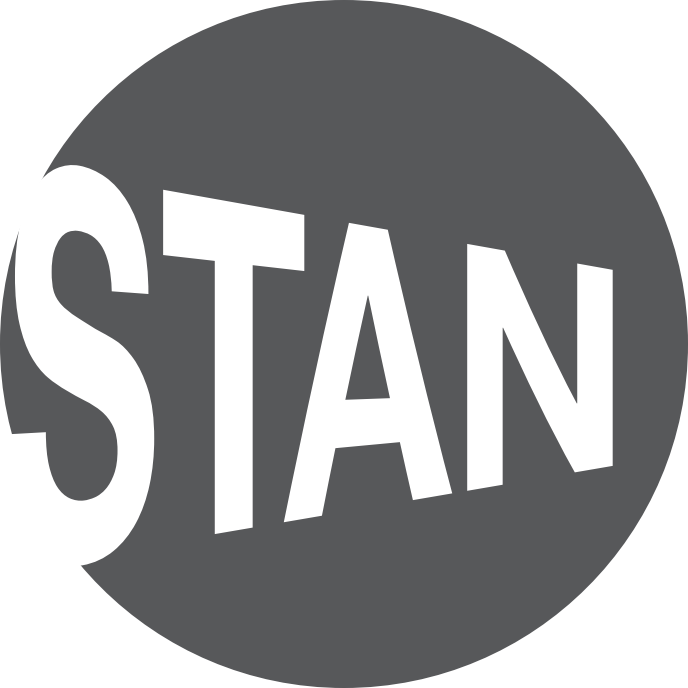

Supplement: Supplemental_longranger-2.2.zip [file stanlogo-main.pdf › lr2.2-public/lib/stan/cmdstan/stan/logos/stanlogo-main.pdf]

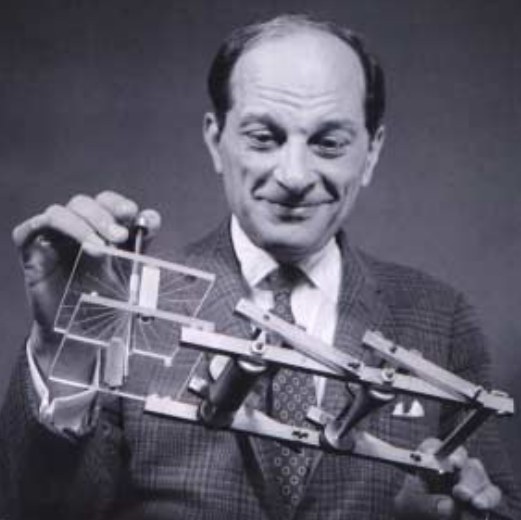

Supplement: Supplemental_longranger-2.2.zip [file ulam-fermiac.pdf › lr2.2-public/lib/stan/cmdstan/stan/logos/ulam-fermiac.pdf]

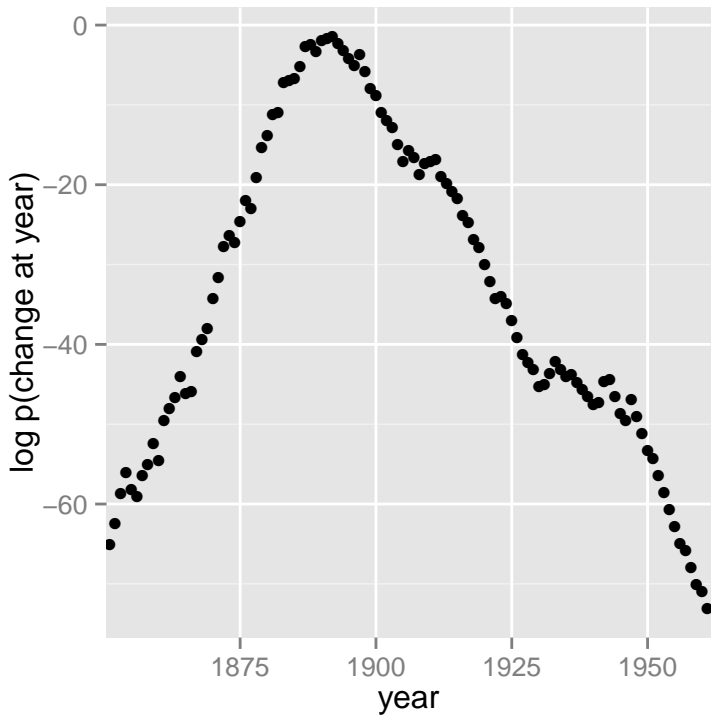

Supplement: Supplemental_longranger-2.2.zip [file change-point-posterior.pdf › lr2.2-public/lib/stan/cmdstan/stan/src/docs/stan-reference/img/change-point-posterior.pdf]

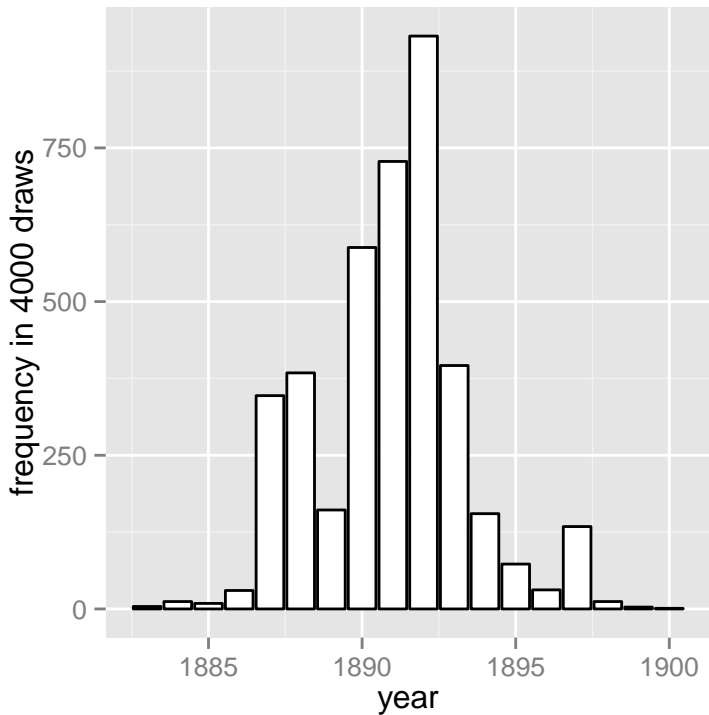

Supplement: Supplemental_longranger-2.2.zip [file s-discrete-posterior.pdf › lr2.2-public/lib/stan/cmdstan/stan/src/docs/stan-reference/img/s-discrete-posterior.pdf]

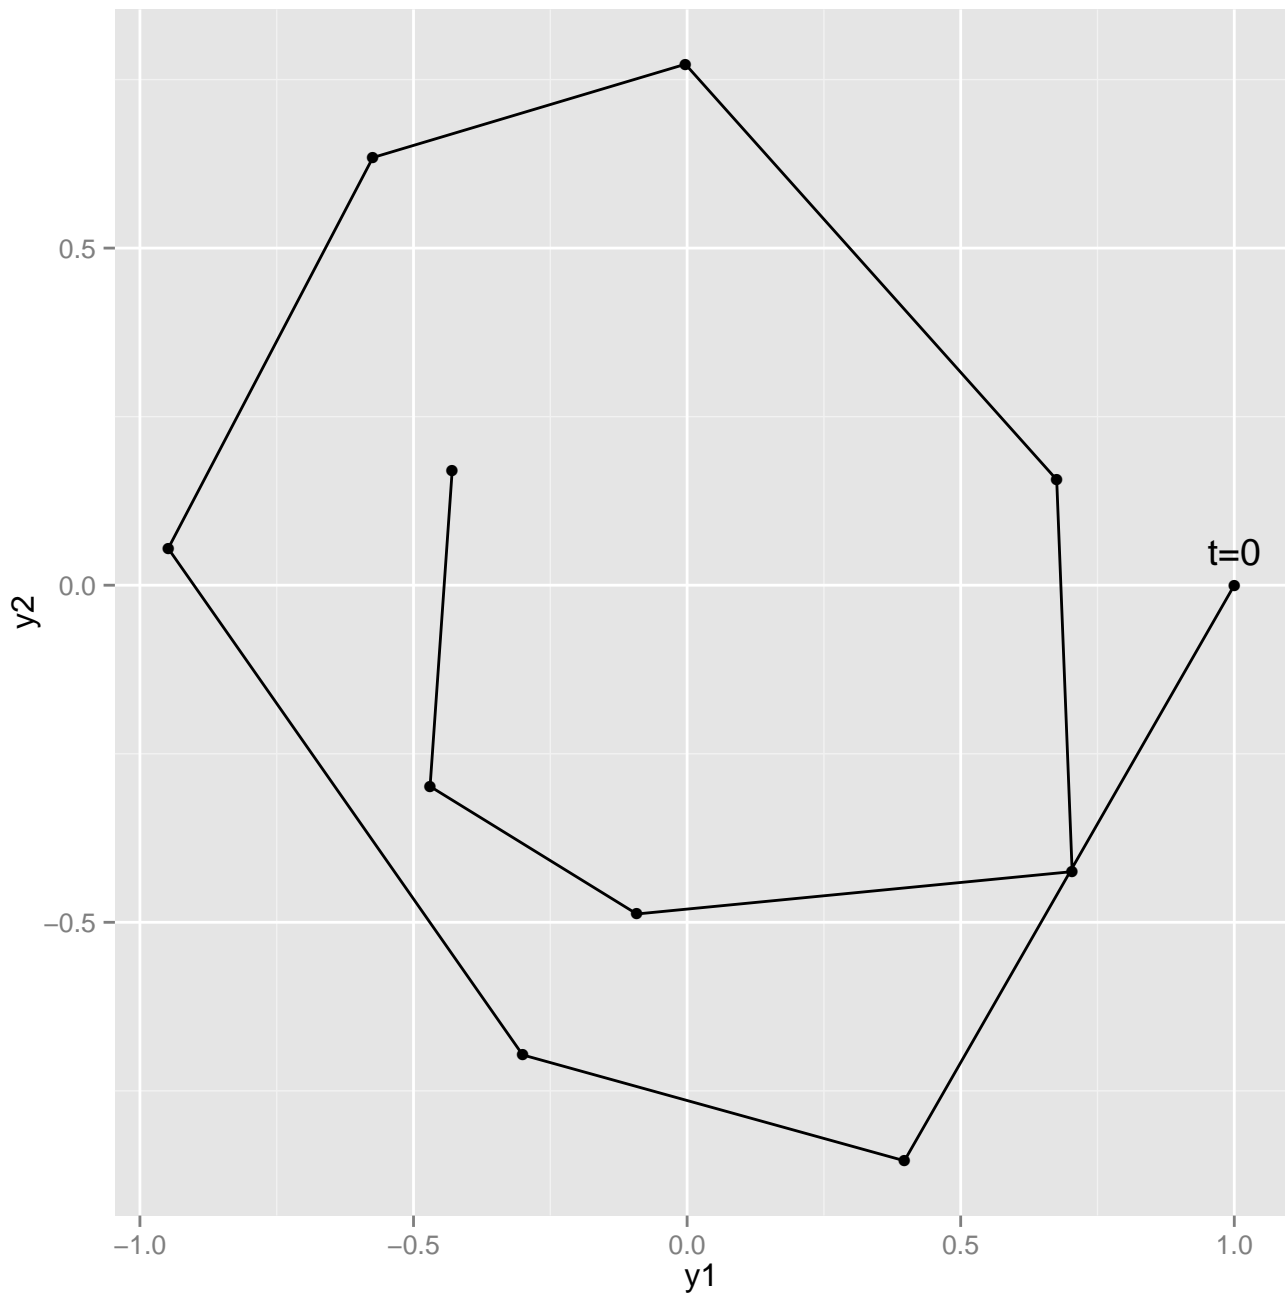

Supplement: Supplemental_longranger-2.2.zip [file sho-ode-trajectory.pdf › lr2.2-public/lib/stan/cmdstan/stan/src/docs/stan-reference/img/sho-ode-trajectory.pdf]

Histogram of log\_Pr\_s

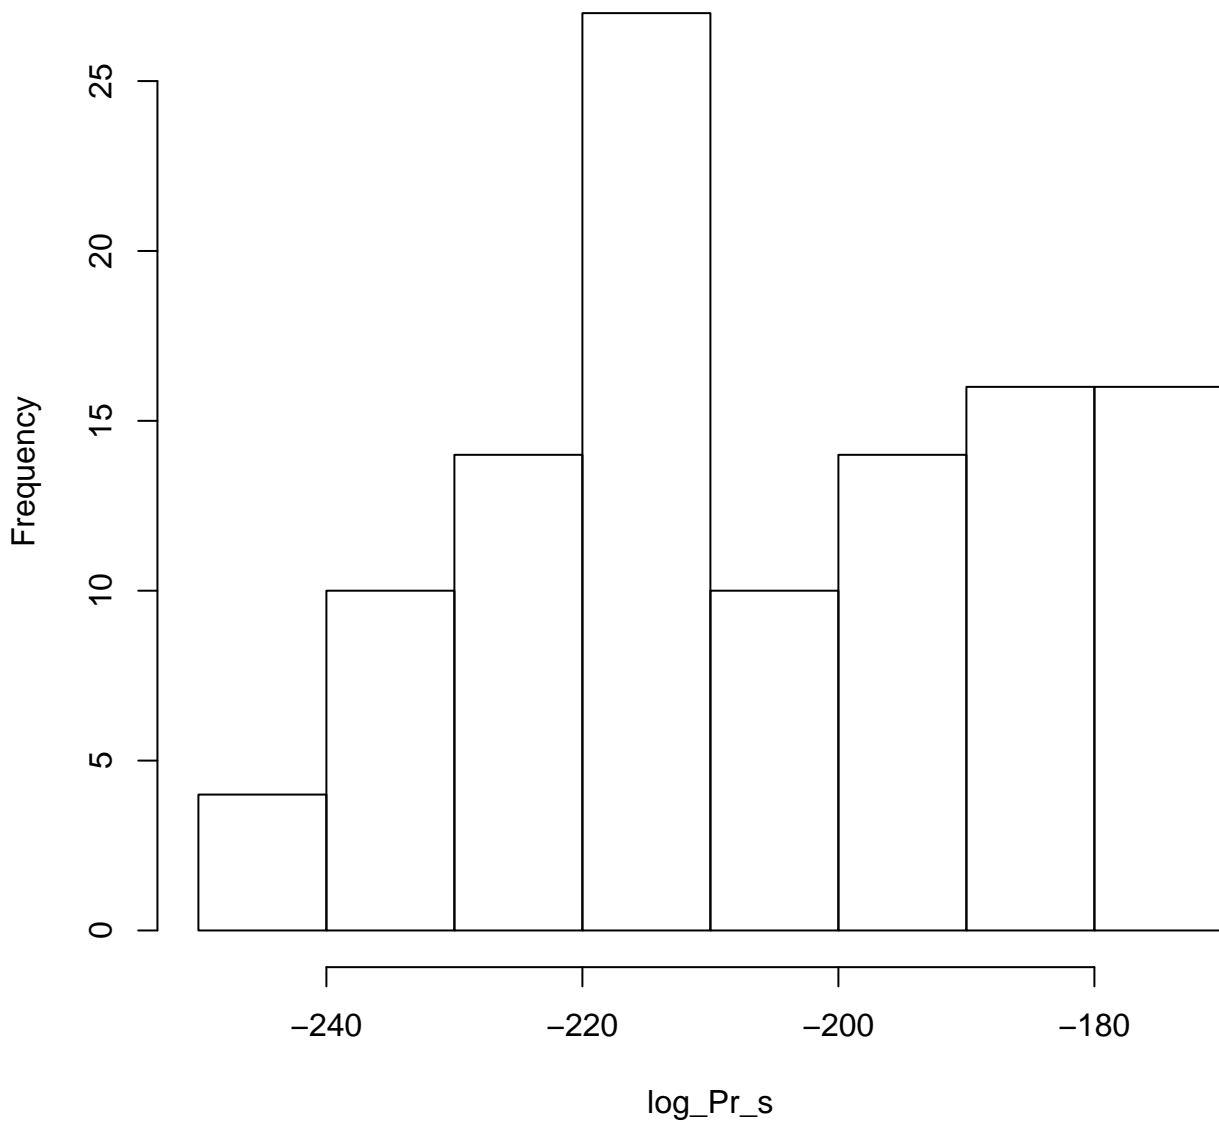

Supplement: Supplemental_longranger-2.2.zip [file sho-trajectory.pdf › lr2.2-public/lib/stan/cmdstan/stan/src/docs/stan-reference/programs/ode/sho/sho-trajectory.pdf]

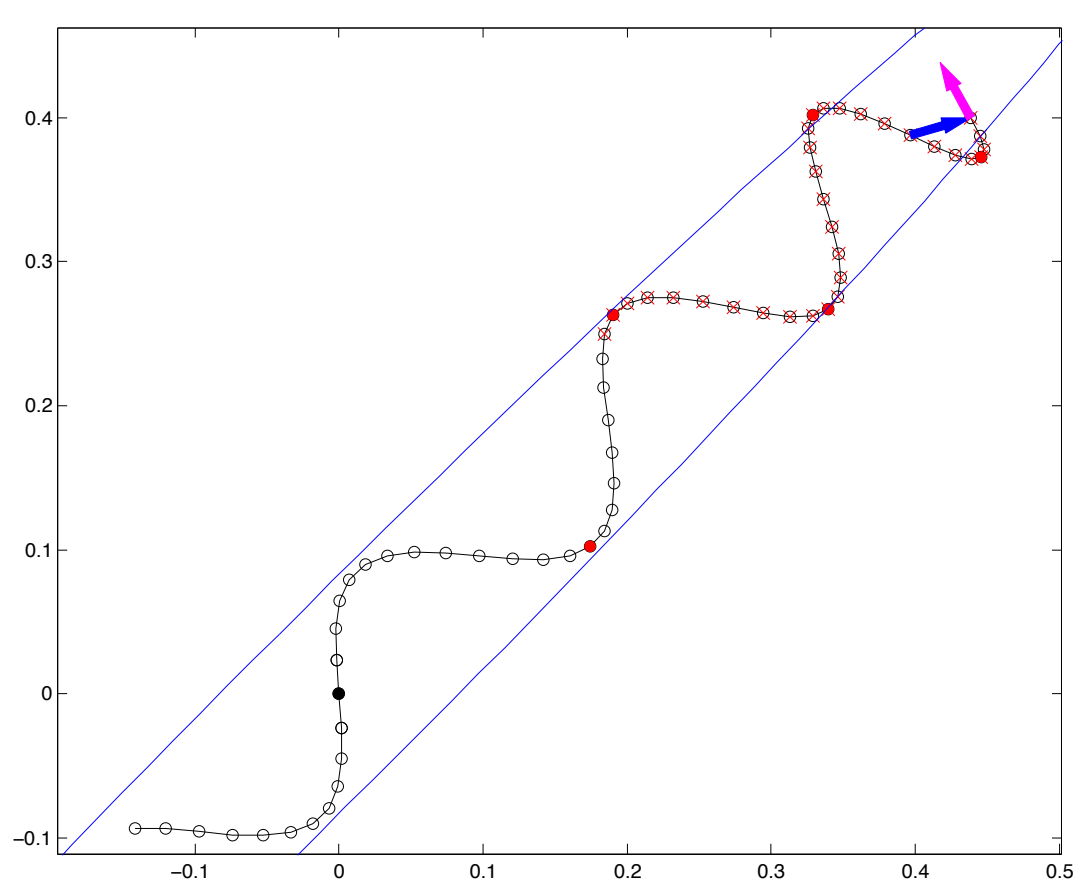

Supplement: Supplemental_longranger-2.2.zip [file hamiltonian-path.pdf › lr2.2-public/lib/stan/cmdstan/stan/src/docs/talks/nyc-ml-meetup-2012/img/hamiltonian-path.pdf]

## 250-D Normal

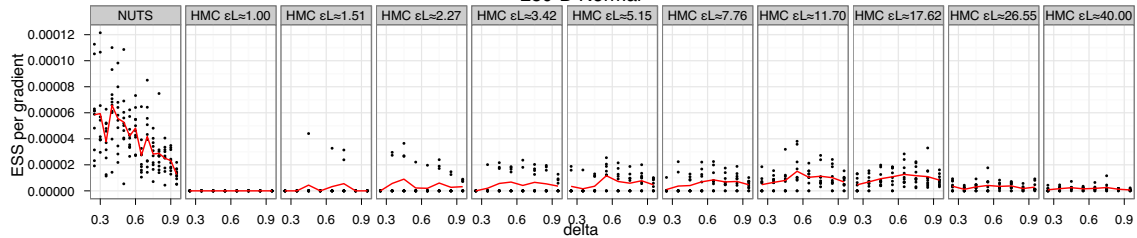

## Logistic Regression

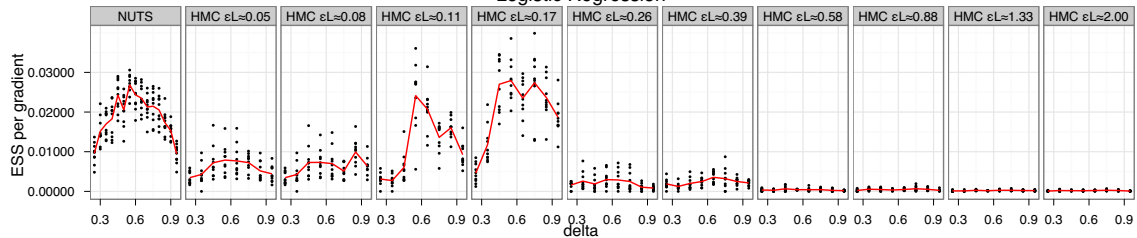

Supplement: Supplemental_longranger-2.2.zip [file nuts-ess-1.pdf › lr2.2-public/lib/stan/cmdstan/stan/src/docs/talks/nyc-ml-meetup-2012/img/nuts-ess-1.pdf]

## Hierarchical Logistic Regression

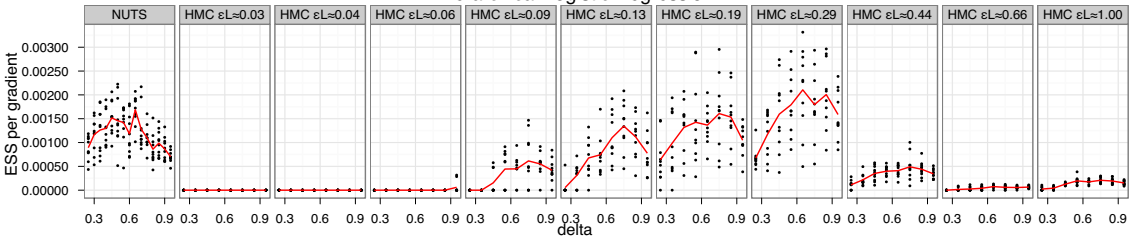

## Stochastic Volatility

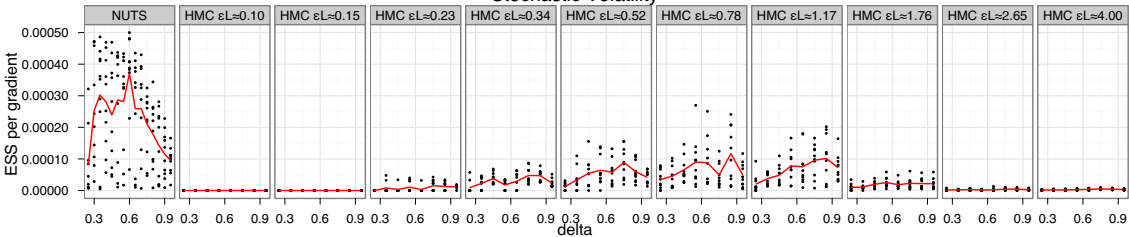

Supplement: Supplemental_longranger-2.2.zip [file nuts-ess-2.pdf › lr2.2-public/lib/stan/cmdstan/stan/src/docs/talks/nyc-ml-meetup-2012/img/nuts-ess-2.pdf]

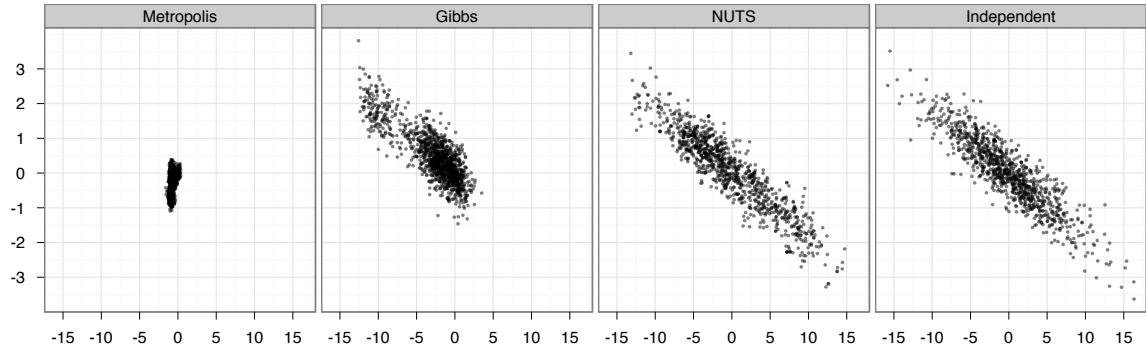

Supplement: Supplemental_longranger-2.2.zip [file nuts-vs.pdf › lr2.2-public/lib/stan/cmdstan/stan/src/docs/talks/nyc-ml-meetup-2012/img/nuts-vs.pdf]
